# Supplementary material for: Proteomics-Based Data Integration of Wheat Cultivars Facing Fusarium graminearum Strains Revealed a Core-Responsive Pattern Controlling Fusarium Head Blight
Source: Front Plant Sci. 2021 May 31;12:644810. doi: 10.3389/fpls.2021.644810 (PMC8201412; doi:10.3389/fpls.2021.644810)
Supplement: Supplementary Table 4 — Summary table indicating the presence/absence analysis of the wheat proteins identified in the different samples. [file Table_4.XLSX]

## Sheet: Sheet2
Supplementary Table S4. Summary table indicating the presence/absence analysis of the wheat proteins identified in the different samples.
	Core-proteome	Extended core-proteome											Accessory core-proteome
Recital F. graminearum-inoculated samples		Undetected									Undetected		Undetected	Undetected	Undetected
Cadenza F. graminearum-inoculated samples			Undetected								Undetected			Undetected
Renan F. graminearum-inoculated samples				Undetected							Undetected			Undetected		Undetected
Recital water-inoculated samples					Undetected			Undetected	Undetected			Undetected	Undetected		Undetected	Undetected
Cadenza water-inoculated samples						Undetected		Undetected		Undetected		Undetected		Undetected	Undetected	Undetected
Renan water-inoculated samples							Undetected		Undetected	Undetected		Undetected			Undetected	Undetected
	TraesCS1A01G002200.1	TraesCS3A01G461100.1	TraesCS4A01G081700.1	TraesCS3A01G029400.1	TraesCS1A01G102900.1	TraesCS1A01G331300.1	TraesCS1A01G047000.1	TraesCS2A01G364400.1	TraesCS1A01G097200.1	TraesCS1A01G088100.2	TraesCS4A01G239100.2	TraesCS1A01G058900.1	TraesCS1A01G008000.1	TraesCS5A01G097800.1	TraesCS7B01G483400.1	TraesCS1A01G007400.1
	TraesCS1A01G005600.3		TraesCS4B01G375000.1	TraesCS3A01G329900.1	TraesCS1D01G000200.1	TraesCS1D01G148500.1	TraesCS1A01G067300.1	TraesCS2D01G588800.1	TraesCS1A01G364600.1	TraesCS1D01G236800LC.1		TraesCS1A01G137800.3				TraesCS2A01G019400.2
	TraesCS1A01G007500.1		TraesCS7A01G285000.1	TraesCS3B01G161000.1	TraesCS2B01G182900.1	TraesCS2B01G086200.1	TraesCS1A01G071700.1	TraesCS3A01G059600.1	TraesCS2D01G005000.1	TraesCS2A01G317700.2		TraesCS1A01G154400LC.1				TraesCS4A01G044000.1
	TraesCS1A01G007700.1			TraesCS3B01G530500.1	TraesCS2D01G163300.1	TraesCS3A01G109900.4	TraesCS1A01G214600.1	TraesCS5D01G210600.1	TraesCS2D01G218800.1	TraesCS2D01G023700.1		TraesCS2A01G320900.1
	TraesCS1A01G009000.3			TraesCS4A01G283200.1	TraesCS2D01G571400.1	TraesCS3A01G268600.1	TraesCS1B01G513200LC.1	TraesCS6A01G130900.1	TraesCS5A01G151700.2	TraesCS3A01G097200.1		TraesCS3A01G316600.3
	TraesCS1A01G011300.1			TraesCS5A01G283100.2	TraesCS3A01G386000.1	TraesCS3A01G455600.1	TraesCS1D01G435600LC.1		TraesCS5A01G271700.1	TraesCS3A01G483700.1		TraesCS3A01G334000.2
	TraesCS1A01G015400.1			TraesCS7A01G285600.1	TraesCS3B01G361100.1	TraesCS3B01G272700.1	TraesCS2A01G052900.1		TraesCS5A01G396700.1	TraesCS4A01G091200.1		TraesCS4A01G055200.1
	TraesCS1A01G015600.1			TraesCSU01G651300LC.1	TraesCS4A01G138400.2	TraesCS4A01G045900.1	TraesCS2A01G367700.1		TraesCS5B01G016300.1	TraesCS5A01G355300.1		TraesCS4A01G244300.1
	TraesCS1A01G017300LC.1				TraesCS4A01G416700.1	TraesCS4A01G509900LC.1	TraesCS2A01G405300.1		TraesCS5B01G032100LC.1	TraesCS5A01G460700.1		TraesCS4D01G122800.1
	TraesCS1A01G024100.1				TraesCS4B01G392700.1	TraesCS5A01G090800.2	TraesCS2A01G583500.1		TraesCS6A01G005100.1	TraesCS6B01G047900.1		TraesCS5A01G402700.1
	TraesCS1A01G027100.1				TraesCS5A01G380800.1	TraesCS5A01G408700.1	TraesCS2A01G583600.1		TraesCS6A01G384300.1	TraesCS7A01G266000.1		TraesCS5A01G532900LC.1
	TraesCS1A01G030000.1				TraesCS5A01G417000.1	TraesCS6A01G150000LC.1	TraesCS2B01G594600.1		TraesCS6D01G360400.1	TraesCS7B01G119500.1		TraesCS5B01G001300.1
	TraesCS1A01G030100.1				TraesCS6D01G198700.1	TraesCS6A01G228000.1	TraesCS2D01G256500.1		TraesCS7A01G035500.1			TraesCS5B01G150300.2
	TraesCS1A01G033000.1				TraesCS7A01G228300LC.1	TraesCS6B01G095900.1	TraesCS3A01G035300.1		TraesCS7A01G126600.1			TraesCS5D01G488500.1
	TraesCS1A01G033500.1				TraesCS7A01G450100.1	TraesCS7A01G278900.1	TraesCS3A01G093900.1		TraesCS7A01G302100.1			TraesCS6A01G059300.1
	TraesCS1A01G033600.1				TraesCS7B01G089800.1	TraesCS7A01G546400.1	TraesCS3A01G301900.1		TraesCS7D01G722700LC.1			TraesCS6A01G375400.1
	TraesCS1A01G035000.1				TraesCS7D01G368700.1	TraesCS7B01G162500.1	TraesCS3A01G316400.1		TraesCSU01G490700LC.1			TraesCS7D01G251000LC.1
	TraesCS1A01G035600.1					TraesCS7D01G278700.1	TraesCS3A01G443700.1
	TraesCS1A01G035800.1					TraesCSU01G008800.1	TraesCS3A01G471900.1
	TraesCS1A01G036200.1						TraesCS3B01G048900.1
	TraesCS1A01G038200.1						TraesCS3B01G389200.1
	TraesCS1A01G040600.1						TraesCS3D01G086800.1
	TraesCS1A01G041700.1						TraesCS4A01G219500.1
	TraesCS1A01G045400.1						TraesCS4A01G226200.1
	TraesCS1A01G045700.1						TraesCS4A01G410800.1
	TraesCS1A01G045800.1						TraesCS4A01G460200.1
	TraesCS1A01G046300.1						TraesCS4B01G042300LC.1
	TraesCS1A01G046500.1						TraesCS4B01G090200.1
	TraesCS1A01G046600.1						TraesCS4D01G039200.1
	TraesCS1A01G052200.2						TraesCS5A01G149200.2
	TraesCS1A01G054400.2						TraesCS5A01G182800.1
	TraesCS1A01G056600.1						TraesCS5A01G286800.1
	TraesCS1A01G064000.1						TraesCS5A01G427400.1
	TraesCS1A01G066100.1						TraesCS5B01G069600.1
	TraesCS1A01G066400.1						TraesCS5B01G251600.1
	TraesCS1A01G070300.1						TraesCS5D01G021400.1
	TraesCS1A01G072000.1						TraesCS5D01G030100.1
	TraesCS1A01G072000LC.1						TraesCS6A01G193300.1
	TraesCS1A01G072100.1						TraesCS6B01G140200.1
	TraesCS1A01G072200.1						TraesCS6B01G766700LC.1
	TraesCS1A01G072300.1						TraesCS6D01G286100.1
	TraesCS1A01G075000.1						TraesCS7A01G266500.2
	TraesCS1A01G075100.1						TraesCS7A01G272900.1
	TraesCS1A01G076100.1						TraesCS7B01G072000.1
	TraesCS1A01G077700.2						TraesCS7B01G206800.1
	TraesCS1A01G078800.1						TraesCS7B01G289000.2
	TraesCS1A01G078900.1						TraesCS7B01G455800.1
	TraesCS1A01G082000.1						TraesCS7D01G030700LC.1
	TraesCS1A01G082200.1						TraesCS7D01G036900.1
	TraesCS1A01G085600.1
	TraesCS1A01G088000.2
	TraesCS1A01G088700.1
	TraesCS1A01G089500.1
	TraesCS1A01G089900.1
	TraesCS1A01G090000.1
	TraesCS1A01G090600.1
	TraesCS1A01G091100.1
	TraesCS1A01G092700.2
	TraesCS1A01G092900.1
	TraesCS1A01G093900.3
	TraesCS1A01G094700.2
	TraesCS1A01G095500.1
	TraesCS1A01G096000.1
	TraesCS1A01G096200.2
	TraesCS1A01G097000.1
	TraesCS1A01G097400.1
	TraesCS1A01G097700.1
	TraesCS1A01G099300.1
	TraesCS1A01G099400.1
	TraesCS1A01G099500.2
	TraesCS1A01G100600.1
	TraesCS1A01G101000.2
	TraesCS1A01G102500.1
	TraesCS1A01G102700.1
	TraesCS1A01G103600.1
	TraesCS1A01G105400.1
	TraesCS1A01G105500.1
	TraesCS1A01G105600.1
	TraesCS1A01G105800.1
	TraesCS1A01G105900.1
	TraesCS1A01G106600.1
	TraesCS1A01G107100.1
	TraesCS1A01G107200.2
	TraesCS1A01G107800.1
	TraesCS1A01G108300.1
	TraesCS1A01G109200.1
	TraesCS1A01G110200.1
	TraesCS1A01G110300.1
	TraesCS1A01G110900.1
	TraesCS1A01G112500.1
	TraesCS1A01G112800.1
	TraesCS1A01G112900.1
	TraesCS1A01G115400.1
	TraesCS1A01G120100.4
	TraesCS1A01G120200.1
	TraesCS1A01G120900.2
	TraesCS1A01G121000.1
	TraesCS1A01G122000.1
	TraesCS1A01G122500.1
	TraesCS1A01G122700.1
	TraesCS1A01G123900.2
	TraesCS1A01G124200.1
	TraesCS1A01G124600.1
	TraesCS1A01G127000.1
	TraesCS1A01G127900.1
	TraesCS1A01G128600.1
	TraesCS1A01G129100.1
	TraesCS1A01G129100LC.1
	TraesCS1A01G129200.1
	TraesCS1A01G130000LC.1
	TraesCS1A01G130800.1
	TraesCS1A01G131500.2
	TraesCS1A01G132400.1
	TraesCS1A01G133100.2
	TraesCS1A01G133700.4
	TraesCS1A01G134600LC.1
	TraesCS1A01G135700.1
	TraesCS1A01G136100.1
	TraesCS1A01G137900.1
	TraesCS1A01G138500.3
	TraesCS1A01G138800.1
	TraesCS1A01G139300.1
	TraesCS1A01G140100.1
	TraesCS1A01G142000.1
	TraesCS1A01G142800.3
	TraesCS1A01G142900.1
	TraesCS1A01G143000.1
	TraesCS1A01G143500.1
	TraesCS1A01G143800.1
	TraesCS1A01G143900.2
	TraesCS1A01G145000.1
	TraesCS1A01G145800.1
	TraesCS1A01G146000.1
	TraesCS1A01G146200.1
	TraesCS1A01G147000.1
	TraesCS1A01G147700.1
	TraesCS1A01G148600.1
	TraesCS1A01G150600.1
	TraesCS1A01G151500.1
	TraesCS1A01G152500.1
	TraesCS1A01G152600.1
	TraesCS1A01G152800.1
	TraesCS1A01G153300.1
	TraesCS1A01G153900.1
	TraesCS1A01G154300.4
	TraesCS1A01G154400.2
	TraesCS1A01G154700.2
	TraesCS1A01G155200.1
	TraesCS1A01G158300.1
	TraesCS1A01G158500.1
	TraesCS1A01G158700.1
	TraesCS1A01G158800.1
	TraesCS1A01G159100.1
	TraesCS1A01G159300.1
	TraesCS1A01G164900.1
	TraesCS1A01G165300.1
	TraesCS1A01G165700.1
	TraesCS1A01G165800.1
	TraesCS1A01G166100.1
	TraesCS1A01G168100.1
	TraesCS1A01G168400.1
	TraesCS1A01G168900.1
	TraesCS1A01G170300.1
	TraesCS1A01G170600.1
	TraesCS1A01G171000.1
	TraesCS1A01G173200.3
	TraesCS1A01G174000.2
	TraesCS1A01G174600.1
	TraesCS1A01G175200.1
	TraesCS1A01G175900.1
	TraesCS1A01G176500.1
	TraesCS1A01G177700.1
	TraesCS1A01G177800.1
	TraesCS1A01G178300.1
	TraesCS1A01G179000.2
	TraesCS1A01G179500.1
	TraesCS1A01G180800.1
	TraesCS1A01G181500.1
	TraesCS1A01G181900.1
	TraesCS1A01G182500.1
	TraesCS1A01G182700.1
	TraesCS1A01G183800.1
	TraesCS1A01G184300.1
	TraesCS1A01G184500.1
	TraesCS1A01G184600.1
	TraesCS1A01G184900.1
	TraesCS1A01G186200.1
	TraesCS1A01G186600.1
	TraesCS1A01G187000.1
	TraesCS1A01G190800.1
	TraesCS1A01G190900.1
	TraesCS1A01G191700.1
	TraesCS1A01G191800.1
	TraesCS1A01G191900.1
	TraesCS1A01G192300.1
	TraesCS1A01G193000.1
	TraesCS1A01G193300.1
	TraesCS1A01G193500.1
	TraesCS1A01G194000.1
	TraesCS1A01G194100.1
	TraesCS1A01G195200.2
	TraesCS1A01G195300.1
	TraesCS1A01G196100LC.1
	TraesCS1A01G196300.1
	TraesCS1A01G197300.1
	TraesCS1A01G198400.1
	TraesCS1A01G199000.2
	TraesCS1A01G200000.2
	TraesCS1A01G201600.2
	TraesCS1A01G203400.1
	TraesCS1A01G203600.1
	TraesCS1A01G203700.1
	TraesCS1A01G204700.1
	TraesCS1A01G205600LC.1
	TraesCS1A01G206900.1
	TraesCS1A01G210200.1
	TraesCS1A01G210600.1
	TraesCS1A01G212400.1
	TraesCS1A01G212600.1
	TraesCS1A01G212800.1
	TraesCS1A01G213000.1
	TraesCS1A01G213100.1
	TraesCS1A01G213600.1
	TraesCS1A01G213900.2
	TraesCS1A01G215600.1
	TraesCS1A01G215900.1
	TraesCS1A01G217200.1
	TraesCS1A01G217300.1
	TraesCS1A01G217700.1
	TraesCS1A01G218700.1
	TraesCS1A01G219900.1
	TraesCS1A01G220200.2
	TraesCS1A01G221100.3
	TraesCS1A01G221800.1
	TraesCS1A01G222000.1
	TraesCS1A01G222500.1
	TraesCS1A01G222800.2
	TraesCS1A01G223300.2
	TraesCS1A01G223800.1
	TraesCS1A01G224000.1
	TraesCS1A01G224800.1
	TraesCS1A01G225000.1
	TraesCS1A01G227000.1
	TraesCS1A01G227300.1
	TraesCS1A01G229100.1
	TraesCS1A01G230400.1
	TraesCS1A01G231000.1
	TraesCS1A01G231100.1
	TraesCS1A01G233200.1
	TraesCS1A01G233400.1
	TraesCS1A01G233600.1
	TraesCS1A01G233700.1
	TraesCS1A01G234600.1
	TraesCS1A01G235200.1
	TraesCS1A01G236100.4
	TraesCS1A01G237100.2
	TraesCS1A01G237900.1
	TraesCS1A01G238900.1
	TraesCS1A01G239600.1
	TraesCS1A01G239700.2
	TraesCS1A01G239800.1
	TraesCS1A01G241000.1
	TraesCS1A01G241900.1
	TraesCS1A01G242600.1
	TraesCS1A01G244700.1
	TraesCS1A01G245000.3
	TraesCS1A01G246400.1
	TraesCS1A01G246600.1
	TraesCS1A01G246900.1
	TraesCS1A01G247800.1
	TraesCS1A01G247900.1
	TraesCS1A01G248400.1
	TraesCS1A01G249600.1
	TraesCS1A01G250000.1
	TraesCS1A01G250300.1
	TraesCS1A01G251000.1
	TraesCS1A01G251200.1
	TraesCS1A01G251900.1
	TraesCS1A01G252400.1
	TraesCS1A01G253200.1
	TraesCS1A01G256500.1
	TraesCS1A01G257000.1
	TraesCS1A01G258800.1
	TraesCS1A01G259700.2
	TraesCS1A01G259800.1
	TraesCS1A01G260200.2
	TraesCS1A01G262400.1
	TraesCS1A01G262500.1
	TraesCS1A01G263300.1
	TraesCS1A01G264000.2
	TraesCS1A01G265600.1
	TraesCS1A01G265800.1
	TraesCS1A01G266000.1
	TraesCS1A01G268500.1
	TraesCS1A01G269300.1
	TraesCS1A01G270100.1
	TraesCS1A01G270300.1
	TraesCS1A01G273500.1
	TraesCS1A01G273900.1
	TraesCS1A01G274400.1
	TraesCS1A01G276500.1
	TraesCS1A01G277500.1
	TraesCS1A01G277600.1
	TraesCS1A01G278300.1
	TraesCS1A01G278800.1
	TraesCS1A01G279000.4
	TraesCS1A01G280700.1
	TraesCS1A01G281400.1
	TraesCS1A01G281700.1
	TraesCS1A01G282000.1
	TraesCS1A01G282600.1
	TraesCS1A01G284900.1
	TraesCS1A01G286200.1
	TraesCS1A01G286300.1
	TraesCS1A01G286900.1
	TraesCS1A01G288800.1
	TraesCS1A01G290500.2
	TraesCS1A01G295600.1
	TraesCS1A01G296200.1
	TraesCS1A01G297900.1
	TraesCS1A01G298800.1
	TraesCS1A01G299100.1
	TraesCS1A01G299500.2
	TraesCS1A01G299700.1
	TraesCS1A01G300200.1
	TraesCS1A01G301400.1
	TraesCS1A01G301600.1
	TraesCS1A01G302200.2
	TraesCS1A01G302300.1
	TraesCS1A01G304100.1
	TraesCS1A01G305700.1
	TraesCS1A01G306400.1
	TraesCS1A01G307400.1
	TraesCS1A01G307700.1
	TraesCS1A01G309700.1
	TraesCS1A01G310500.1
	TraesCS1A01G313900.1
	TraesCS1A01G314100.1
	TraesCS1A01G316900.1
	TraesCS1A01G317900.1
	TraesCS1A01G318900.1
	TraesCS1A01G319300.1
	TraesCS1A01G319400.1
	TraesCS1A01G321000.1
	TraesCS1A01G322300.1
	TraesCS1A01G323400.1
	TraesCS1A01G325600.1
	TraesCS1A01G330900.1
	TraesCS1A01G333700.1
	TraesCS1A01G337800.1
	TraesCS1A01G338200.1
	TraesCS1A01G338300.1
	TraesCS1A01G339300.1
	TraesCS1A01G339900.1
	TraesCS1A01G340100.1
	TraesCS1A01G340400.1
	TraesCS1A01G341300.1
	TraesCS1A01G342500.1
	TraesCS1A01G342700.1
	TraesCS1A01G343100.1
	TraesCS1A01G343400.1
	TraesCS1A01G344000.1
	TraesCS1A01G346600.1
	TraesCS1A01G346800.3
	TraesCS1A01G348000.1
	TraesCS1A01G348500.1
	TraesCS1A01G349200.1
	TraesCS1A01G349400LC.1
	TraesCS1A01G350200.1
	TraesCS1A01G350500.1
	TraesCS1A01G350800.1
	TraesCS1A01G353000.1
	TraesCS1A01G353300.1
	TraesCS1A01G353800.1
	TraesCS1A01G354400.1
	TraesCS1A01G354700.1
	TraesCS1A01G355200.1
	TraesCS1A01G355300.1
	TraesCS1A01G356500.1
	TraesCS1A01G357100.1
	TraesCS1A01G357200.1
	TraesCS1A01G357700.1
	TraesCS1A01G357900.1
	TraesCS1A01G360000.1
	TraesCS1A01G360500.1
	TraesCS1A01G360700.3
	TraesCS1A01G361200.1
	TraesCS1A01G362000.1
	TraesCS1A01G365600.1
	TraesCS1A01G365800.1
	TraesCS1A01G366600.1
	TraesCS1A01G369400.1
	TraesCS1A01G369600.1
	TraesCS1A01G369700.1
	TraesCS1A01G369800.1
	TraesCS1A01G371900.1
	TraesCS1A01G372400.2
	TraesCS1A01G378000.1
	TraesCS1A01G379000.1
	TraesCS1A01G379300.1
	TraesCS1A01G379800.1
	TraesCS1A01G381700LC.1
	TraesCS1A01G381800.1
	TraesCS1A01G382800.1
	TraesCS1A01G383500.1
	TraesCS1A01G385400.2
	TraesCS1A01G386300.1
	TraesCS1A01G387700.1
	TraesCS1A01G388500.1
	TraesCS1A01G388800.1
	TraesCS1A01G389100.1
	TraesCS1A01G389600.1
	TraesCS1A01G392000.1
	TraesCS1A01G392400.1
	TraesCS1A01G395300.1
	TraesCS1A01G396000.1
	TraesCS1A01G396800.1
	TraesCS1A01G397300.1
	TraesCS1A01G397400.1
	TraesCS1A01G400300.1
	TraesCS1A01G402500.1
	TraesCS1A01G403200.1
	TraesCS1A01G403700.1
	TraesCS1A01G403800.1
	TraesCS1A01G404200.1
	TraesCS1A01G404500.1
	TraesCS1A01G406500.1
	TraesCS1A01G407100.1
	TraesCS1A01G407600.1
	TraesCS1A01G408900.1
	TraesCS1A01G410200.1
	TraesCS1A01G411600.2
	TraesCS1A01G411900.1
	TraesCS1A01G412900.1
	TraesCS1A01G413000.1
	TraesCS1A01G413700.1
	TraesCS1A01G413900.1
	TraesCS1A01G415000.1
	TraesCS1A01G416500.1
	TraesCS1A01G417500.1
	TraesCS1A01G419600.2
	TraesCS1A01G420500.1
	TraesCS1A01G423800.1
	TraesCS1A01G424200.1
	TraesCS1A01G425000.1
	TraesCS1A01G425100.1
	TraesCS1A01G425700.1
	TraesCS1A01G427000.1
	TraesCS1A01G427100.1
	TraesCS1A01G428400.1
	TraesCS1A01G429400.1
	TraesCS1A01G433000.1
	TraesCS1A01G433400.1
	TraesCS1A01G437500.2
	TraesCS1A01G438600.2
	TraesCS1A01G440200.1
	TraesCS1A01G442500.1
	TraesCS1A01G442600.1
	TraesCS1A01G443400.1
	TraesCS1A01G443500.1
	TraesCS1A01G443600.1
	TraesCS1A01G445900.1
	TraesCS1A01G499000LC.1
	TraesCS1A01G512200LC.1
	TraesCS1A01G538600LC.1
	TraesCS1A01G540700LC.1
	TraesCS1A01G541900LC.1
	TraesCS1A01G542100LC.1
	TraesCS1A01G542300LC.1
	TraesCS1A01G542900LC.1
	TraesCS1A01G543400LC.1
	TraesCS1A01G543600LC.1
	TraesCS1A01G543700LC.1
	TraesCS1A01G544000LC.1
	TraesCS1A01G564700LC.1
	TraesCS1A01G611800LC.1
	TraesCS1B01G001100.1
	TraesCS1B01G011000.1
	TraesCS1B01G011100.1
	TraesCS1B01G011600.1
	TraesCS1B01G011700.1
	TraesCS1B01G013500.1
	TraesCS1B01G017800.1
	TraesCS1B01G018900.1
	TraesCS1B01G019100.2
	TraesCS1B01G024500.1
	TraesCS1B01G024700.1
	TraesCS1B01G037100.1
	TraesCS1B01G042300.1
	TraesCS1B01G053600.1
	TraesCS1B01G058700.1
	TraesCS1B01G059000.1
	TraesCS1B01G059800.2
	TraesCS1B01G060900.1
	TraesCS1B01G067300.1
	TraesCS1B01G071700LC.1
	TraesCS1B01G077500.1
	TraesCS1B01G084700.1
	TraesCS1B01G085100.1
	TraesCS1B01G090500.1
	TraesCS1B01G090600.1
	TraesCS1B01G090700.1
	TraesCS1B01G093600.1
	TraesCS1B01G093700.1
	TraesCS1B01G095800.1
	TraesCS1B01G096900.1
	TraesCS1B01G097700.1
	TraesCS1B01G098000.1
	TraesCS1B01G098800.1
	TraesCS1B01G100800.1
	TraesCS1B01G106400.2
	TraesCS1B01G107600.1
	TraesCS1B01G107700.1
	TraesCS1B01G108700.1
	TraesCS1B01G113300.3
	TraesCS1B01G113400.1
	TraesCS1B01G113500.1
	TraesCS1B01G113700.1
	TraesCS1B01G115900.1
	TraesCS1B01G120300.2
	TraesCS1B01G120800.1
	TraesCS1B01G123200.1
	TraesCS1B01G124100.1
	TraesCS1B01G124900.1
	TraesCS1B01G127500.3
	TraesCS1B01G128500.1
	TraesCS1B01G129500.1
	TraesCS1B01G135200.1
	TraesCS1B01G138700LC.1
	TraesCS1B01G139000.1
	TraesCS1B01G139500.1
	TraesCS1B01G139600.1
	TraesCS1B01G141900.1
	TraesCS1B01G142600.2
	TraesCS1B01G142800.1
	TraesCS1B01G146200.1
	TraesCS1B01G150200.1
	TraesCS1B01G150900.1
	TraesCS1B01G151300.1
	TraesCS1B01G155700.3
	TraesCS1B01G158000.1
	TraesCS1B01G158100.1
	TraesCS1B01G159100.1
	TraesCS1B01G159700.1
	TraesCS1B01G161300.1
	TraesCS1B01G162300.1
	TraesCS1B01G164000.2
	TraesCS1B01G164500.1
	TraesCS1B01G164900.1
	TraesCS1B01G165900.2
	TraesCS1B01G167100.1
	TraesCS1B01G173900LC.1
	TraesCS1B01G174700.1
	TraesCS1B01G174800.1
	TraesCS1B01G181000.3
	TraesCS1B01G181800.2
	TraesCS1B01G182400.1
	TraesCS1B01G182500.1
	TraesCS1B01G184700.1
	TraesCS1B01G186700.1
	TraesCS1B01G188000.1
	TraesCS1B01G189400.1
	TraesCS1B01G191000.1
	TraesCS1B01G192400.1
	TraesCS1B01G192900.1
	TraesCS1B01G194200.1
	TraesCS1B01G194700.1
	TraesCS1B01G195200.1
	TraesCS1B01G196000.1
	TraesCS1B01G199500.1
	TraesCS1B01G199600.1
	TraesCS1B01G200200.2
	TraesCS1B01G202000.1
	TraesCS1B01G202100.2
	TraesCS1B01G202800LC.1
	TraesCS1B01G205300.1
	TraesCS1B01G206000.1
	TraesCS1B01G206600.1
	TraesCS1B01G206800.1
	TraesCS1B01G208000LC.1
	TraesCS1B01G208100LC.1
	TraesCS1B01G208500.1
	TraesCS1B01G209100.1
	TraesCS1B01G209800.1
	TraesCS1B01G213600.1
	TraesCS1B01G217000.1
	TraesCS1B01G217700.1
	TraesCS1B01G222300.1
	TraesCS1B01G222500.1
	TraesCS1B01G223300.1
	TraesCS1B01G224100.1
	TraesCS1B01G224200.1
	TraesCS1B01G225700.1
	TraesCS1B01G226500.1
	TraesCS1B01G227100.1
	TraesCS1B01G227600.1
	TraesCS1B01G229700.1
	TraesCS1B01G229900.1
	TraesCS1B01G230500.1
	TraesCS1B01G231000.2
	TraesCS1B01G231400.2
	TraesCS1B01G232200.2
	TraesCS1B01G235500.1
	TraesCS1B01G236100.3
	TraesCS1B01G237300.1
	TraesCS1B01G241400.1
	TraesCS1B01G242100.1
	TraesCS1B01G246400.1
	TraesCS1B01G250600.1
	TraesCS1B01G251000.1
	TraesCS1B01G251800.1
	TraesCS1B01G255900.1
	TraesCS1B01G257500.1
	TraesCS1B01G258200.1
	TraesCS1B01G260400.1
	TraesCS1B01G261700.1
	TraesCS1B01G261800.1
	TraesCS1B01G263100.1
	TraesCS1B01G264600.1
	TraesCS1B01G264900.1
	TraesCS1B01G268000.1
	TraesCS1B01G269700LC.2
	TraesCS1B01G270100.1
	TraesCS1B01G270200LC.1
	TraesCS1B01G270600.1
	TraesCS1B01G271700.1
	TraesCS1B01G271800.2
	TraesCS1B01G272800.3
	TraesCS1B01G273000.2
	TraesCS1B01G273100.2
	TraesCS1B01G274600.1
	TraesCS1B01G277000.2
	TraesCS1B01G277100.1
	TraesCS1B01G279100.2
	TraesCS1B01G279800.1
	TraesCS1B01G280200LC.1
	TraesCS1B01G280600.1
	TraesCS1B01G283300.1
	TraesCS1B01G286800.1
	TraesCS1B01G288000.1
	TraesCS1B01G289700.1
	TraesCS1B01G290800.1
	TraesCS1B01G291500.1
	TraesCS1B01G291900.2
	TraesCS1B01G293000.1
	TraesCS1B01G294300.1
	TraesCS1B01G294600.1
	TraesCS1B01G297800.1
	TraesCS1B01G302400.1
	TraesCS1B01G303200.1
	TraesCS1B01G303300.1
	TraesCS1B01G305000.1
	TraesCS1B01G311200.1
	TraesCS1B01G312000.1
	TraesCS1B01G312100.1
	TraesCS1B01G312400.1
	TraesCS1B01G314600.1
	TraesCS1B01G316400.1
	TraesCS1B01G317500.1
	TraesCS1B01G319100.1
	TraesCS1B01G319400.1
	TraesCS1B01G319500.1
	TraesCS1B01G321800.1
	TraesCS1B01G322100.1
	TraesCS1B01G322900.1
	TraesCS1B01G325100.1
	TraesCS1B01G330200.1
	TraesCS1B01G332700.1
	TraesCS1B01G334600.2
	TraesCS1B01G336300.1
	TraesCS1B01G338500.1
	TraesCS1B01G340300.2
	TraesCS1B01G340600.1
	TraesCS1B01G346200.2
	TraesCS1B01G349300.1
	TraesCS1B01G349900.1
	TraesCS1B01G350700.1
	TraesCS1B01G351000.1
	TraesCS1B01G352200.2
	TraesCS1B01G354000.1
	TraesCS1B01G355600.1
	TraesCS1B01G356900.1
	TraesCS1B01G359600LC.1
	TraesCS1B01G359800.1
	TraesCS1B01G361400.1
	TraesCS1B01G361700.1
	TraesCS1B01G367100.1
	TraesCS1B01G368900.1
	TraesCS1B01G372600.1
	TraesCS1B01G373900.1
	TraesCS1B01G374200.1
	TraesCS1B01G374500.1
	TraesCS1B01G375900LC.1
	TraesCS1B01G376100.1
	TraesCS1B01G377000.1
	TraesCS1B01G378000.1
	TraesCS1B01G379200.1
	TraesCS1B01G380800.1
	TraesCS1B01G383400.1
	TraesCS1B01G384100.1
	TraesCS1B01G384400.1
	TraesCS1B01G386200.1
	TraesCS1B01G386600.1
	TraesCS1B01G386900.1
	TraesCS1B01G388000.1
	TraesCS1B01G388500.1
	TraesCS1B01G388700.1
	TraesCS1B01G388900.1
	TraesCS1B01G389200.1
	TraesCS1B01G391900.1
	TraesCS1B01G393500.1
	TraesCS1B01G398800.1
	TraesCS1B01G400300.1
	TraesCS1B01G404900.1
	TraesCS1B01G405000.1
	TraesCS1B01G405200.1
	TraesCS1B01G405300.1
	TraesCS1B01G407300.1
	TraesCS1B01G409200.1
	TraesCS1B01G409200LC.1
	TraesCS1B01G410300.1
	TraesCS1B01G411200LC.1
	TraesCS1B01G411700.3
	TraesCS1B01G417000.1
	TraesCS1B01G422200.1
	TraesCS1B01G424400.1
	TraesCS1B01G427900.1
	TraesCS1B01G428800.1
	TraesCS1B01G428900.1
	TraesCS1B01G431000.1
	TraesCS1B01G432600.1
	TraesCS1B01G433200.1
	TraesCS1B01G433300.1
	TraesCS1B01G433400.1
	TraesCS1B01G434000.1
	TraesCS1B01G434100.2
	TraesCS1B01G437500.1
	TraesCS1B01G437600.1
	TraesCS1B01G441500.1
	TraesCS1B01G443200.1
	TraesCS1B01G443700.1
	TraesCS1B01G444900.1
	TraesCS1B01G449700.2
	TraesCS1B01G451100.1
	TraesCS1B01G455900.1
	TraesCS1B01G457600.1
	TraesCS1B01G458700.1
	TraesCS1B01G463400.1
	TraesCS1B01G464800.1
	TraesCS1B01G466300.1
	TraesCS1B01G468300.1
	TraesCS1B01G472500.1
	TraesCS1B01G477600.1
	TraesCS1B01G478800.1
	TraesCS1B01G570600LC.1
	TraesCS1B01G598400LC.1
	TraesCS1B01G613000LC.1
	TraesCS1B01G627800LC.1
	TraesCS1B01G627900LC.1
	TraesCS1B01G643900LC.1
	TraesCS1B01G680300LC.1
	TraesCS1B01G729100LC.1
	TraesCS1B01G754600LC.1
	TraesCS1B01G772000LC.1
	TraesCS1B01G772500LC.1
	TraesCS1B01G791800LC.1
	TraesCS1B01G793300LC.1
	TraesCS1D01G000700.1
	TraesCS1D01G001200.1
	TraesCS1D01G003900.3
	TraesCS1D01G007700.1
	TraesCS1D01G011700.3
	TraesCS1D01G013400.1
	TraesCS1D01G015100.1
	TraesCS1D01G021600.1
	TraesCS1D01G030600.1
	TraesCS1D01G034700.1
	TraesCS1D01G037000.1
	TraesCS1D01G039300.1
	TraesCS1D01G041200.1
	TraesCS1D01G046400.1
	TraesCS1D01G049200LC.1
	TraesCS1D01G052500.1
	TraesCS1D01G052900.1
	TraesCS1D01G053500.1
	TraesCS1D01G060500.1
	TraesCS1D01G063500.1
	TraesCS1D01G066600.1
	TraesCS1D01G067100.1
	TraesCS1D01G067500.1
	TraesCS1D01G074600.1
	TraesCS1D01G074700.1
	TraesCS1D01G077600.1
	TraesCS1D01G077700.2
	TraesCS1D01G079800.1
	TraesCS1D01G081700.1
	TraesCS1D01G082800.1
	TraesCS1D01G086700.1
	TraesCS1D01G087600.1
	TraesCS1D01G088300LC.1
	TraesCS1D01G089200LC.1
	TraesCS1D01G090000.1
	TraesCS1D01G090100.1
	TraesCS1D01G091000.1
	TraesCS1D01G094600.1
	TraesCS1D01G094800.1
	TraesCS1D01G098100.1
	TraesCS1D01G098200LC.1
	TraesCS1D01G101300.1
	TraesCS1D01G102400.1
	TraesCS1D01G104800.2
	TraesCS1D01G105200.2
	TraesCS1D01G105500.2
	TraesCS1D01G106200.1
	TraesCS1D01G111300.2
	TraesCS1D01G111600.1
	TraesCS1D01G121200.3
	TraesCS1D01G123400.2
	TraesCS1D01G124600.2
	TraesCS1D01G125300.1
	TraesCS1D01G128800.1
	TraesCS1D01G129500.2
	TraesCS1D01G130500.1
	TraesCS1D01G134600.1
	TraesCS1D01G137400.1
	TraesCS1D01G141800.1
	TraesCS1D01G144000.1
	TraesCS1D01G144100.1
	TraesCS1D01G144200.1
	TraesCS1D01G144400.1
	TraesCS1D01G148000.1
	TraesCS1D01G149400.1
	TraesCS1D01G149800.1
	TraesCS1D01G149900.1
	TraesCS1D01G152300.1
	TraesCS1D01G153900.1
	TraesCS1D01G156400.2
	TraesCS1D01G161000.1
	TraesCS1D01G161900.1
	TraesCS1D01G162200.1
	TraesCS1D01G163900.1
	TraesCS1D01G165400.1
	TraesCS1D01G165500.1
	TraesCS1D01G166100.1
	TraesCS1D01G166900.1
	TraesCS1D01G168300.4
	TraesCS1D01G168700.2
	TraesCS1D01G169900.1
	TraesCS1D01G170000.1
	TraesCS1D01G174900.1
	TraesCS1D01G175000.1
	TraesCS1D01G176800.1
	TraesCS1D01G179700.1
	TraesCS1D01G180800.1
	TraesCS1D01G181100.1
	TraesCS1D01G181200.1
	TraesCS1D01G181400.1
	TraesCS1D01G181600.1
	TraesCS1D01G183200.1
	TraesCS1D01G184000.1
	TraesCS1D01G184600.1
	TraesCS1D01G189600.1
	TraesCS1D01G190000.1
	TraesCS1D01G191100.1
	TraesCS1D01G191900.1
	TraesCS1D01G193400.1
	TraesCS1D01G194600.1
	TraesCS1D01G195400.1
	TraesCS1D01G199700.1
	TraesCS1D01G206100LC.1
	TraesCS1D01G207100.3
	TraesCS1D01G208500.1
	TraesCS1D01G211500.1
	TraesCS1D01G213500.1
	TraesCS1D01G213900.2
	TraesCS1D01G215100.2
	TraesCS1D01G218700.1
	TraesCS1D01G219000.1
	TraesCS1D01G219700.1
	TraesCS1D01G220400.1
	TraesCS1D01G222600.2
	TraesCS1D01G228500LC.1
	TraesCS1D01G228600.2
	TraesCS1D01G231000.1
	TraesCS1D01G232800.1
	TraesCS1D01G234700.1
	TraesCS1D01G236500.1
	TraesCS1D01G237800.3
	TraesCS1D01G238900.1
	TraesCS1D01G245900.2
	TraesCS1D01G247900LC.1
	TraesCS1D01G249100.1
	TraesCS1D01G252900.1
	TraesCS1D01G256600.2
	TraesCS1D01G261000.1
	TraesCS1D01G262400.1
	TraesCS1D01G265600.1
	TraesCS1D01G266300.1
	TraesCS1D01G266300LC.1
	TraesCS1D01G267500LC.1
	TraesCS1D01G268500.1
	TraesCS1D01G268600.1
	TraesCS1D01G269000.1
	TraesCS1D01G270600.1
	TraesCS1D01G274000.1
	TraesCS1D01G276700.1
	TraesCS1D01G280700.2
	TraesCS1D01G281200.1
	TraesCS1D01G281800.1
	TraesCS1D01G283700LC.1
	TraesCS1D01G283900.1
	TraesCS1D01G284000.2
	TraesCS1D01G284100LC.1
	TraesCS1D01G284200LC.1
	TraesCS1D01G284600LC.1
	TraesCS1D01G285300LC.1
	TraesCS1D01G287400.1
	TraesCS1D01G292000LC.1
	TraesCS1D01G294200LC.1
	TraesCS1D01G295600.1
	TraesCS1D01G295900.1
	TraesCS1D01G298400.2
	TraesCS1D01G301700.1
	TraesCS1D01G303600.1
	TraesCS1D01G305900.1
	TraesCS1D01G306200.1
	TraesCS1D01G308200.1
	TraesCS1D01G308300.1
	TraesCS1D01G308400.1
	TraesCS1D01G310300.1
	TraesCS1D01G313800.2
	TraesCS1D01G322400.3
	TraesCS1D01G327200.1
	TraesCS1D01G329000.1
	TraesCS1D01G329300.1
	TraesCS1D01G333500.1
	TraesCS1D01G342100.1
	TraesCS1D01G343400.1
	TraesCS1D01G344600.1
	TraesCS1D01G344900.1
	TraesCS1D01G346100.1
	TraesCS1D01G346200.1
	TraesCS1D01G348900.2
	TraesCS1D01G349700.1
	TraesCS1D01G350000.1
	TraesCS1D01G350100.1
	TraesCS1D01G350200.1
	TraesCS1D01G350900.1
	TraesCS1D01G352000.1
	TraesCS1D01G357000.1
	TraesCS1D01G359500.1
	TraesCS1D01G360700.1
	TraesCS1D01G361400.1
	TraesCS1D01G361600.1
	TraesCS1D01G361800.3
	TraesCS1D01G361900.1
	TraesCS1D01G362100.1
	TraesCS1D01G362200.1
	TraesCS1D01G362700.1
	TraesCS1D01G364700.1
	TraesCS1D01G365100.1
	TraesCS1D01G368700.1
	TraesCS1D01G372000.1
	TraesCS1D01G374100.1
	TraesCS1D01G374700.1
	TraesCS1D01G375200.1
	TraesCS1D01G375400.1
	TraesCS1D01G375700.1
	TraesCS1D01G378600.1
	TraesCS1D01G386800.1
	TraesCS1D01G390900.1
	TraesCS1D01G395700.1
	TraesCS1D01G396100.1
	TraesCS1D01G396600.1
	TraesCS1D01G403100.1
	TraesCS1D01G403300LC.1
	TraesCS1D01G404700.1
	TraesCS1D01G408100.1
	TraesCS1D01G409400.1
	TraesCS1D01G410800.1
	TraesCS1D01G411300.1
	TraesCS1D01G411500.1
	TraesCS1D01G412200.1
	TraesCS1D01G412300.1
	TraesCS1D01G419800.2
	TraesCS1D01G422300.1
	TraesCS1D01G424300.1
	TraesCS1D01G429600.1
	TraesCS1D01G432400.1
	TraesCS1D01G435700LC.1
	TraesCS1D01G436300LC.1
	TraesCS1D01G439500.1
	TraesCS1D01G442400.1
	TraesCS1D01G448800.1
	TraesCS1D01G451900LC.1
	TraesCS1D01G452300.1
	TraesCS1D01G452500.1
	TraesCS1D01G453600.1
	TraesCS1D01G454400.2
	TraesCS1D01G489300LC.1
	TraesCS1D01G507900LC.1
	TraesCS1D01G578400LC.1
	TraesCS1D01G581600LC.1
	TraesCS1D01G589400LC.1
	TraesCS2A01G000600.1
	TraesCS2A01G005200.1
	TraesCS2A01G007300.1
	TraesCS2A01G007800.1
	TraesCS2A01G007900.1
	TraesCS2A01G009400.2
	TraesCS2A01G010100.1
	TraesCS2A01G012200.1
	TraesCS2A01G014300.1
	TraesCS2A01G017100.1
	TraesCS2A01G017500.1
	TraesCS2A01G025700.1
	TraesCS2A01G026600.1
	TraesCS2A01G028000.1
	TraesCS2A01G028700.1
	TraesCS2A01G032500.1
	TraesCS2A01G032600.1
	TraesCS2A01G033300.2
	TraesCS2A01G033600.1
	TraesCS2A01G034800.1
	TraesCS2A01G035100.1
	TraesCS2A01G036100.1
	TraesCS2A01G037200.1
	TraesCS2A01G037400.1
	TraesCS2A01G037800.2
	TraesCS2A01G040200.1
	TraesCS2A01G041100.1
	TraesCS2A01G041900.1
	TraesCS2A01G042100.1
	TraesCS2A01G044600.1
	TraesCS2A01G044900.1
	TraesCS2A01G048600.1
	TraesCS2A01G053200.1
	TraesCS2A01G056500.1
	TraesCS2A01G060200.1
	TraesCS2A01G061100.3
	TraesCS2A01G063500.1
	TraesCS2A01G064700.2
	TraesCS2A01G065000.1
	TraesCS2A01G065100.4
	TraesCS2A01G065700.1
	TraesCS2A01G066200.1
	TraesCS2A01G067700.1
	TraesCS2A01G067800.1
	TraesCS2A01G069400.1
	TraesCS2A01G069500.1
	TraesCS2A01G070200.1
	TraesCS2A01G070300.1
	TraesCS2A01G072500.3
	TraesCS2A01G074700.1
	TraesCS2A01G075000.1
	TraesCS2A01G075900LC.1
	TraesCS2A01G076300.1
	TraesCS2A01G076600.1
	TraesCS2A01G076700.1
	TraesCS2A01G076900.1
	TraesCS2A01G078200.1
	TraesCS2A01G079500.1
	TraesCS2A01G081100.1
	TraesCS2A01G082100.1
	TraesCS2A01G082200.1
	TraesCS2A01G083300.1
	TraesCS2A01G086400.1
	TraesCS2A01G087100LC.1
	TraesCS2A01G088000.1
	TraesCS2A01G088300.2
	TraesCS2A01G088500.1
	TraesCS2A01G088900.3
	TraesCS2A01G089300.1
	TraesCS2A01G090000.1
	TraesCS2A01G092400.1
	TraesCS2A01G092800.1
	TraesCS2A01G094200.1
	TraesCS2A01G095700.1
	TraesCS2A01G097500.2
	TraesCS2A01G097800.1
	TraesCS2A01G098100.1
	TraesCS2A01G098200.1
	TraesCS2A01G098400.2
	TraesCS2A01G099800.1
	TraesCS2A01G101600.1
	TraesCS2A01G101700.2
	TraesCS2A01G102100.2
	TraesCS2A01G102400.1
	TraesCS2A01G102500.1
	TraesCS2A01G102600.1
	TraesCS2A01G105400.1
	TraesCS2A01G105500.1
	TraesCS2A01G105900.1
	TraesCS2A01G107300.1
	TraesCS2A01G107500.1
	TraesCS2A01G107600.1
	TraesCS2A01G108400.1
	TraesCS2A01G108700.1
	TraesCS2A01G108900.1
	TraesCS2A01G109600.1
	TraesCS2A01G109700.1
	TraesCS2A01G109900.1
	TraesCS2A01G110300.1
	TraesCS2A01G111600.2
	TraesCS2A01G112400.1
	TraesCS2A01G112700.1
	TraesCS2A01G113900.1
	TraesCS2A01G114000.1
	TraesCS2A01G114100.1
	TraesCS2A01G114300.1
	TraesCS2A01G114400.1
	TraesCS2A01G114700LC.1
	TraesCS2A01G115100.1
	TraesCS2A01G117300.1
	TraesCS2A01G120800.1
	TraesCS2A01G121200.2
	TraesCS2A01G121800.1
	TraesCS2A01G122100.1
	TraesCS2A01G123000.1
	TraesCS2A01G123800.1
	TraesCS2A01G124200.1
	TraesCS2A01G126700.2
	TraesCS2A01G127200.3
	TraesCS2A01G128600.1
	TraesCS2A01G129600.3
	TraesCS2A01G130900.1
	TraesCS2A01G132200.2
	TraesCS2A01G133700.1
	TraesCS2A01G134000.1
	TraesCS2A01G134300.1
	TraesCS2A01G138300.1
	TraesCS2A01G138700.1
	TraesCS2A01G142400.1
	TraesCS2A01G143100.1
	TraesCS2A01G144200.1
	TraesCS2A01G145500.1
	TraesCS2A01G145800.1
	TraesCS2A01G146000.1
	TraesCS2A01G146800.1
	TraesCS2A01G147200.1
	TraesCS2A01G147400.1
	TraesCS2A01G147500.1
	TraesCS2A01G149300.1
	TraesCS2A01G151800.1
	TraesCS2A01G154100.1
	TraesCS2A01G155500.1
	TraesCS2A01G158300.1
	TraesCS2A01G160500.1
	TraesCS2A01G161300.1
	TraesCS2A01G161700.1
	TraesCS2A01G162700.3
	TraesCS2A01G163000.1
	TraesCS2A01G163100.1
	TraesCS2A01G163600.1
	TraesCS2A01G163700.1
	TraesCS2A01G163800.1
	TraesCS2A01G164000.1
	TraesCS2A01G164600.1
	TraesCS2A01G165100.1
	TraesCS2A01G166800.2
	TraesCS2A01G167000LC.1
	TraesCS2A01G168200.1
	TraesCS2A01G168300.1
	TraesCS2A01G168400.1
	TraesCS2A01G168500.2
	TraesCS2A01G168900.1
	TraesCS2A01G169100.1
	TraesCS2A01G169800.1
	TraesCS2A01G170200.1
	TraesCS2A01G170300.1
	TraesCS2A01G170800.1
	TraesCS2A01G171600.1
	TraesCS2A01G171800.1
	TraesCS2A01G172000.1
	TraesCS2A01G172100.2
	TraesCS2A01G172400.1
	TraesCS2A01G172600.1
	TraesCS2A01G172700.1
	TraesCS2A01G174700.1
	TraesCS2A01G175500.1
	TraesCS2A01G176100.1
	TraesCS2A01G177000.1
	TraesCS2A01G177100.1
	TraesCS2A01G177700.1
	TraesCS2A01G180200.1
	TraesCS2A01G182500.1
	TraesCS2A01G184000.1
	TraesCS2A01G184400.2
	TraesCS2A01G184500.1
	TraesCS2A01G184900.1
	TraesCS2A01G185500.2
	TraesCS2A01G185700.1
	TraesCS2A01G187300.1
	TraesCS2A01G188200.1
	TraesCS2A01G189400.1
	TraesCS2A01G190400.1
	TraesCS2A01G190700.1
	TraesCS2A01G190900.1
	TraesCS2A01G191500.1
	TraesCS2A01G192000.1
	TraesCS2A01G192100.2
	TraesCS2A01G192200.1
	TraesCS2A01G192900.1
	TraesCS2A01G197600.1
	TraesCS2A01G197900.1
	TraesCS2A01G198000.1
	TraesCS2A01G198500.1
	TraesCS2A01G199600.1
	TraesCS2A01G202300.1
	TraesCS2A01G202900.1
	TraesCS2A01G203600.1
	TraesCS2A01G206000.1
	TraesCS2A01G206100.1
	TraesCS2A01G206200.1
	TraesCS2A01G207900.1
	TraesCS2A01G209800.1
	TraesCS2A01G211100.1
	TraesCS2A01G211800.1
	TraesCS2A01G211900.1
	TraesCS2A01G212100.1
	TraesCS2A01G214600.1
	TraesCS2A01G214700.1
	TraesCS2A01G215000.1
	TraesCS2A01G215100.1
	TraesCS2A01G215800.2
	TraesCS2A01G215900.1
	TraesCS2A01G216100.1
	TraesCS2A01G216500.1
	TraesCS2A01G218700.1
	TraesCS2A01G220100.1
	TraesCS2A01G220400.1
	TraesCS2A01G221300.1
	TraesCS2A01G221900.2
	TraesCS2A01G222600.1
	TraesCS2A01G223600.1
	TraesCS2A01G224000.1
	TraesCS2A01G225200.1
	TraesCS2A01G226200.1
	TraesCS2A01G226300.1
	TraesCS2A01G226800.1
	TraesCS2A01G227300.1
	TraesCS2A01G227500.1
	TraesCS2A01G228000.1
	TraesCS2A01G228300.1
	TraesCS2A01G228800.1
	TraesCS2A01G229400.1
	TraesCS2A01G231500.2
	TraesCS2A01G232400.1
	TraesCS2A01G232500.1
	TraesCS2A01G233000.1
	TraesCS2A01G233100.1
	TraesCS2A01G233500.1
	TraesCS2A01G234200.2
	TraesCS2A01G234300.1
	TraesCS2A01G234500.1
	TraesCS2A01G234900.1
	TraesCS2A01G235000.2
	TraesCS2A01G235900.1
	TraesCS2A01G236600.1
	TraesCS2A01G237000.1
	TraesCS2A01G239100LC.1
	TraesCS2A01G239200.2
	TraesCS2A01G240000.1
	TraesCS2A01G240200.1
	TraesCS2A01G243200.1
	TraesCS2A01G243500.1
	TraesCS2A01G244100.1
	TraesCS2A01G244800.1
	TraesCS2A01G245200.1
	TraesCS2A01G245900.1
	TraesCS2A01G246000.1
	TraesCS2A01G246600.1
	TraesCS2A01G246900.1
	TraesCS2A01G247300.3
	TraesCS2A01G248300.1
	TraesCS2A01G249100.1
	TraesCS2A01G249700.1
	TraesCS2A01G250800.1
	TraesCS2A01G252600.1
	TraesCS2A01G253600.1
	TraesCS2A01G253700.1
	TraesCS2A01G254100.1
	TraesCS2A01G254200.1
	TraesCS2A01G254600.3
	TraesCS2A01G254800.2
	TraesCS2A01G255000.2
	TraesCS2A01G255100.1
	TraesCS2A01G256400.1
	TraesCS2A01G257000.1
	TraesCS2A01G259000.1
	TraesCS2A01G259900.1
	TraesCS2A01G261600.1
	TraesCS2A01G262500.1
	TraesCS2A01G263500.1
	TraesCS2A01G263900.1
	TraesCS2A01G266700.1
	TraesCS2A01G272000.1
	TraesCS2A01G272700.1
	TraesCS2A01G272800.1
	TraesCS2A01G273000.2
	TraesCS2A01G273100.1
	TraesCS2A01G274700.1
	TraesCS2A01G274800.1
	TraesCS2A01G274900.2
	TraesCS2A01G276100.1
	TraesCS2A01G277900.1
	TraesCS2A01G279600.1
	TraesCS2A01G280100.1
	TraesCS2A01G280500.1
	TraesCS2A01G281500.1
	TraesCS2A01G281700.1
	TraesCS2A01G282100.1
	TraesCS2A01G282900.1
	TraesCS2A01G283300.1
	TraesCS2A01G284300.1
	TraesCS2A01G284400.1
	TraesCS2A01G288400.1
	TraesCS2A01G291200.1
	TraesCS2A01G292000.1
	TraesCS2A01G292400.1
	TraesCS2A01G292900.2
	TraesCS2A01G293300.1
	TraesCS2A01G293400.1
	TraesCS2A01G293700.1
	TraesCS2A01G294000.1
	TraesCS2A01G294200.1
	TraesCS2A01G294500.1
	TraesCS2A01G295400.1
	TraesCS2A01G295600.1
	TraesCS2A01G295800.2
	TraesCS2A01G296000.1
	TraesCS2A01G297500.1
	TraesCS2A01G299300.1
	TraesCS2A01G300100.3
	TraesCS2A01G301900.1
	TraesCS2A01G302000.1
	TraesCS2A01G302600.1
	TraesCS2A01G303400.1
	TraesCS2A01G303900.1
	TraesCS2A01G304200.1
	TraesCS2A01G304400.1
	TraesCS2A01G305700.1
	TraesCS2A01G305800.1
	TraesCS2A01G306200.1
	TraesCS2A01G306400.3
	TraesCS2A01G307300.1
	TraesCS2A01G308600.4
	TraesCS2A01G309200.1
	TraesCS2A01G311200.3
	TraesCS2A01G312400.1
	TraesCS2A01G313000.1
	TraesCS2A01G313500.1
	TraesCS2A01G314500.1
	TraesCS2A01G314800.2
	TraesCS2A01G315300.1
	TraesCS2A01G315600.1
	TraesCS2A01G315700LC.1
	TraesCS2A01G316700.1
	TraesCS2A01G316900.1
	TraesCS2A01G317000.1
	TraesCS2A01G317900.1
	TraesCS2A01G320700.2
	TraesCS2A01G321200.1
	TraesCS2A01G321300.1
	TraesCS2A01G322400.2
	TraesCS2A01G323300.1
	TraesCS2A01G324700.1
	TraesCS2A01G324800.1
	TraesCS2A01G324900.1
	TraesCS2A01G325400.1
	TraesCS2A01G325600.1
	TraesCS2A01G327100.1
	TraesCS2A01G330200.1
	TraesCS2A01G331400.1
	TraesCS2A01G331600.1
	TraesCS2A01G331700.1
	TraesCS2A01G333500.1
	TraesCS2A01G334000.1
	TraesCS2A01G334600.1
	TraesCS2A01G335200.1
	TraesCS2A01G335700.1
	TraesCS2A01G336000.1
	TraesCS2A01G336100LC.1
	TraesCS2A01G336500.1
	TraesCS2A01G337100.1
	TraesCS2A01G337300.1
	TraesCS2A01G338100.1
	TraesCS2A01G339200.1
	TraesCS2A01G340000.1
	TraesCS2A01G342600.1
	TraesCS2A01G342800.1
	TraesCS2A01G343600.1
	TraesCS2A01G343800.1
	TraesCS2A01G343900.1
	TraesCS2A01G344200.1
	TraesCS2A01G344400.1
	TraesCS2A01G344600.1
	TraesCS2A01G346200.1
	TraesCS2A01G347900.1
	TraesCS2A01G348100.1
	TraesCS2A01G348500.1
	TraesCS2A01G349600.1
	TraesCS2A01G349700.1
	TraesCS2A01G350700.1
	TraesCS2A01G352000.1
	TraesCS2A01G352500.1
	TraesCS2A01G352600.1
	TraesCS2A01G353500.1
	TraesCS2A01G354200.2
	TraesCS2A01G354500.1
	TraesCS2A01G354900.1
	TraesCS2A01G355600.2
	TraesCS2A01G355800.2
	TraesCS2A01G356300.2
	TraesCS2A01G356900.1
	TraesCS2A01G358000.2
	TraesCS2A01G358900.2
	TraesCS2A01G359300.1
	TraesCS2A01G362600.3
	TraesCS2A01G362700.1
	TraesCS2A01G363600.1
	TraesCS2A01G364000.1
	TraesCS2A01G368500.1
	TraesCS2A01G369800.1
	TraesCS2A01G370800.1
	TraesCS2A01G371100.1
	TraesCS2A01G371600.1
	TraesCS2A01G372500.1
	TraesCS2A01G373600.1
	TraesCS2A01G374600.1
	TraesCS2A01G377100.1
	TraesCS2A01G378200.1
	TraesCS2A01G380500LC.2
	TraesCS2A01G382100.1
	TraesCS2A01G382700.1
	TraesCS2A01G383100.1
	TraesCS2A01G383600.1
	TraesCS2A01G384200.1
	TraesCS2A01G385900.2
	TraesCS2A01G386600.1
	TraesCS2A01G386800.1
	TraesCS2A01G387000.1
	TraesCS2A01G387800.1
	TraesCS2A01G388900.1
	TraesCS2A01G389000.1
	TraesCS2A01G397100.1
	TraesCS2A01G397300LC.1
	TraesCS2A01G397400.1
	TraesCS2A01G397700.1
	TraesCS2A01G398500.1
	TraesCS2A01G398900.1
	TraesCS2A01G399000.1
	TraesCS2A01G399100.1
	TraesCS2A01G400000.1
	TraesCS2A01G400300.1
	TraesCS2A01G401300.1
	TraesCS2A01G403100.4
	TraesCS2A01G404100.1
	TraesCS2A01G407500.1
	TraesCS2A01G407900.1
	TraesCS2A01G408500.1
	TraesCS2A01G408900.1
	TraesCS2A01G409200.1
	TraesCS2A01G410700.1
	TraesCS2A01G410800.1
	TraesCS2A01G413700.1
	TraesCS2A01G414700.1
	TraesCS2A01G419900.1
	TraesCS2A01G421100.1
	TraesCS2A01G421400.1
	TraesCS2A01G422500.1
	TraesCS2A01G423300.1
	TraesCS2A01G423900.1
	TraesCS2A01G424600.1
	TraesCS2A01G424700.2
	TraesCS2A01G426000.1
	TraesCS2A01G426900.1
	TraesCS2A01G427600.1
	TraesCS2A01G430100.2
	TraesCS2A01G430300.1
	TraesCS2A01G431000.1
	TraesCS2A01G432100.2
	TraesCS2A01G432600.1
	TraesCS2A01G434500LC.1
	TraesCS2A01G434600.2
	TraesCS2A01G436200.1
	TraesCS2A01G437100.1
	TraesCS2A01G437500.1
	TraesCS2A01G437600.1
	TraesCS2A01G437700.1
	TraesCS2A01G439400.1
	TraesCS2A01G442400.2
	TraesCS2A01G443200.1
	TraesCS2A01G443900.1
	TraesCS2A01G444100.1
	TraesCS2A01G445100.1
	TraesCS2A01G447700.1
	TraesCS2A01G448400.1
	TraesCS2A01G449500.1
	TraesCS2A01G449600.1
	TraesCS2A01G449900.1
	TraesCS2A01G451000.1
	TraesCS2A01G456100.1
	TraesCS2A01G457600LC.1
	TraesCS2A01G457900.2
	TraesCS2A01G459600.1
	TraesCS2A01G459800.1
	TraesCS2A01G459900.1
	TraesCS2A01G461600.1
	TraesCS2A01G463000.1
	TraesCS2A01G464100.1
	TraesCS2A01G464300.3
	TraesCS2A01G465200LC.1
	TraesCS2A01G466800.1
	TraesCS2A01G467700.1
	TraesCS2A01G468300.1
	TraesCS2A01G468500.1
	TraesCS2A01G468800.1
	TraesCS2A01G469000.1
	TraesCS2A01G471300.1
	TraesCS2A01G473000.1
	TraesCS2A01G473600.1
	TraesCS2A01G476600.1
	TraesCS2A01G477600.1
	TraesCS2A01G477700.1
	TraesCS2A01G477900.1
	TraesCS2A01G478700.1
	TraesCS2A01G481300.1
	TraesCS2A01G481400.1
	TraesCS2A01G483100.1
	TraesCS2A01G485400.1
	TraesCS2A01G487400.1
	TraesCS2A01G487500.1
	TraesCS2A01G487900.2
	TraesCS2A01G488000.1
	TraesCS2A01G488300.1
	TraesCS2A01G488400.1
	TraesCS2A01G488900.1
	TraesCS2A01G489600.2
	TraesCS2A01G489700.2
	TraesCS2A01G490200.1
	TraesCS2A01G490900.1
	TraesCS2A01G492400.4
	TraesCS2A01G493500.1
	TraesCS2A01G493600.2
	TraesCS2A01G493700.1
	TraesCS2A01G495800.1
	TraesCS2A01G497200.1
	TraesCS2A01G497600.1
	TraesCS2A01G497700.1
	TraesCS2A01G498600.1
	TraesCS2A01G498900LC.1
	TraesCS2A01G500400.1
	TraesCS2A01G501400LC.1
	TraesCS2A01G501600.1
	TraesCS2A01G502100.1
	TraesCS2A01G502200.1
	TraesCS2A01G502400.1
	TraesCS2A01G504300.2
	TraesCS2A01G504600.1
	TraesCS2A01G505800.2
	TraesCS2A01G506400.1
	TraesCS2A01G506900.1
	TraesCS2A01G507400.2
	TraesCS2A01G507500.1
	TraesCS2A01G508900.1
	TraesCS2A01G511900.1
	TraesCS2A01G512400.1
	TraesCS2A01G512400LC.1
	TraesCS2A01G515700.1
	TraesCS2A01G516500.1
	TraesCS2A01G517100.3
	TraesCS2A01G517900.3
	TraesCS2A01G518600.1
	TraesCS2A01G519900.1
	TraesCS2A01G520300.1
	TraesCS2A01G520400.1
	TraesCS2A01G521900.1
	TraesCS2A01G522400.1
	TraesCS2A01G523600.1
	TraesCS2A01G525500.1
	TraesCS2A01G526400.1
	TraesCS2A01G526700.1
	TraesCS2A01G528900.1
	TraesCS2A01G529900.1
	TraesCS2A01G531400LC.1
	TraesCS2A01G532800.1
	TraesCS2A01G537100.1
	TraesCS2A01G537800LC.1
	TraesCS2A01G543000.1
	TraesCS2A01G543500.1
	TraesCS2A01G543700LC.1
	TraesCS2A01G543800.2
	TraesCS2A01G543900.1
	TraesCS2A01G545700.1
	TraesCS2A01G548000.1
	TraesCS2A01G548700.1
	TraesCS2A01G549200.2
	TraesCS2A01G549500.1
	TraesCS2A01G549700.1
	TraesCS2A01G551300.1
	TraesCS2A01G552000.1
	TraesCS2A01G552800.1
	TraesCS2A01G553500.2
	TraesCS2A01G556900.1
	TraesCS2A01G558100.1
	TraesCS2A01G559500.1
	TraesCS2A01G559600.1
	TraesCS2A01G560300.1
	TraesCS2A01G562400.1
	TraesCS2A01G562500.1
	TraesCS2A01G563100.1
	TraesCS2A01G566700.1
	TraesCS2A01G567900.1
	TraesCS2A01G568000LC.1
	TraesCS2A01G570700.1
	TraesCS2A01G571300.1
	TraesCS2A01G573900.1
	TraesCS2A01G574400LC.1
	TraesCS2A01G574600.1
	TraesCS2A01G575500.1
	TraesCS2A01G576400.1
	TraesCS2A01G576900.1
	TraesCS2A01G577600.1
	TraesCS2A01G580600.1
	TraesCS2A01G580800.2
	TraesCS2A01G581600.1
	TraesCS2A01G582300.1
	TraesCS2A01G583000LC.1
	TraesCS2A01G583100.1
	TraesCS2A01G583800.2
	TraesCS2A01G584800.1
	TraesCS2A01G584900.1
	TraesCS2A01G586500.1
	TraesCS2A01G587900.1
	TraesCS2A01G588300.1
	TraesCS2A01G588700.1
	TraesCS2A01G590000.2
	TraesCS2A01G590600.1
	TraesCS2A01G591600.1
	TraesCS2A01G591900.1
	TraesCS2A01G593000.1
	TraesCS2A01G593600LC.1
	TraesCS2A01G594800LC.1
	TraesCS2A01G602800LC.1
	TraesCS2A01G609900LC.1
	TraesCS2A01G646700LC.1
	TraesCS2A01G659700LC.1
	TraesCS2A01G661700LC.1
	TraesCS2A01G696400LC.1
	TraesCS2A01G730600LC.1
	TraesCS2A01G739600LC.1
	TraesCS2B01G003600.1
	TraesCS2B01G006700.1
	TraesCS2B01G012800.1
	TraesCS2B01G023500.1
	TraesCS2B01G026100.1
	TraesCS2B01G031200.1
	TraesCS2B01G031800.1
	TraesCS2B01G035900.1
	TraesCS2B01G037200.1
	TraesCS2B01G040000.1
	TraesCS2B01G040300.1
	TraesCS2B01G040500.1
	TraesCS2B01G040600.1
	TraesCS2B01G041800.1
	TraesCS2B01G046500.1
	TraesCS2B01G047400.1
	TraesCS2B01G047900.1
	TraesCS2B01G048700.1
	TraesCS2B01G049200.1
	TraesCS2B01G050400.1
	TraesCS2B01G051000.1
	TraesCS2B01G053100.4
	TraesCS2B01G053600.1
	TraesCS2B01G053700.1
	TraesCS2B01G053800.1
	TraesCS2B01G054700.2
	TraesCS2B01G062500.1
	TraesCS2B01G063000LC.1
	TraesCS2B01G063900.1
	TraesCS2B01G066800.1
	TraesCS2B01G066900.1
	TraesCS2B01G074400LC.1
	TraesCS2B01G076900.1
	TraesCS2B01G077200.1
	TraesCS2B01G079300.1
	TraesCS2B01G079500.1
	TraesCS2B01G079900.1
	TraesCS2B01G082700.1
	TraesCS2B01G083400LC.1
	TraesCS2B01G084200.1
	TraesCS2B01G087400.1
	TraesCS2B01G090300.1
	TraesCS2B01G091300.1
	TraesCS2B01G093000.1
	TraesCS2B01G093100.1
	TraesCS2B01G094300.1
	TraesCS2B01G096200.1
	TraesCS2B01G096600.1
	TraesCS2B01G098400LC.1
	TraesCS2B01G099700.1
	TraesCS2B01G100400.1
	TraesCS2B01G101700.1
	TraesCS2B01G102700.1
	TraesCS2B01G102800.1
	TraesCS2B01G102900.3
	TraesCS2B01G103600.1
	TraesCS2B01G103900.1
	TraesCS2B01G107500.1
	TraesCS2B01G116200.1
	TraesCS2B01G116300.1
	TraesCS2B01G117100.1
	TraesCS2B01G118700.1
	TraesCS2B01G118800.2
	TraesCS2B01G119600.1
	TraesCS2B01G122300.1
	TraesCS2B01G124600.1
	TraesCS2B01G124800.1
	TraesCS2B01G124900.1
	TraesCS2B01G125200.1
	TraesCS2B01G125300.1
	TraesCS2B01G125500.1
	TraesCS2B01G126500.1
	TraesCS2B01G127100.1
	TraesCS2B01G127400.1
	TraesCS2B01G127700.1
	TraesCS2B01G129300.1
	TraesCS2B01G131100.1
	TraesCS2B01G131400.1
	TraesCS2B01G133200.1
	TraesCS2B01G133300.3
	TraesCS2B01G143900.1
	TraesCS2B01G144100.1
	TraesCS2B01G144200.1
	TraesCS2B01G145700.1
	TraesCS2B01G147700.1
	TraesCS2B01G148000.1
	TraesCS2B01G148400.1
	TraesCS2B01G149000.2
	TraesCS2B01G152600.1
	TraesCS2B01G152900.1
	TraesCS2B01G154400.1
	TraesCS2B01G156400.3
	TraesCS2B01G157800.1
	TraesCS2B01G157900LC.1
	TraesCS2B01G162500.1
	TraesCS2B01G168300.1
	TraesCS2B01G168600LC.1
	TraesCS2B01G169200.1
	TraesCS2B01G171200.1
	TraesCS2B01G171300.1
	TraesCS2B01G172100.1
	TraesCS2B01G172200.1
	TraesCS2B01G173500LC.1
	TraesCS2B01G174500.1
	TraesCS2B01G177300.1
	TraesCS2B01G180900.1
	TraesCS2B01G181600.1
	TraesCS2B01G181900.1
	TraesCS2B01G183500.1
	TraesCS2B01G184900.1
	TraesCS2B01G187300.1
	TraesCS2B01G189300.1
	TraesCS2B01G189900.1
	TraesCS2B01G191200.1
	TraesCS2B01G193600.1
	TraesCS2B01G194200.1
	TraesCS2B01G195200.2
	TraesCS2B01G195700LC.1
	TraesCS2B01G196100.1
	TraesCS2B01G196600.1
	TraesCS2B01G197100.1
	TraesCS2B01G197200.1
	TraesCS2B01G200100.1
	TraesCS2B01G200900.1
	TraesCS2B01G204100.1
	TraesCS2B01G207000.1
	TraesCS2B01G209000.1
	TraesCS2B01G209100.1
	TraesCS2B01G214000.3
	TraesCS2B01G214100.3
	TraesCS2B01G216100.1
	TraesCS2B01G219000.1
	TraesCS2B01G219100.1
	TraesCS2B01G220000.1
	TraesCS2B01G221600.1
	TraesCS2B01G222400.2
	TraesCS2B01G224300.1
	TraesCS2B01G225400.1
	TraesCS2B01G225800.2
	TraesCS2B01G226900.1
	TraesCS2B01G230000.2
	TraesCS2B01G233400.1
	TraesCS2B01G234100.1
	TraesCS2B01G234600.1
	TraesCS2B01G237200.1
	TraesCS2B01G239200.1
	TraesCS2B01G241500.1
	TraesCS2B01G244100.1
	TraesCS2B01G246000.1
	TraesCS2B01G248700.2
	TraesCS2B01G250500.2
	TraesCS2B01G253100.2
	TraesCS2B01G253300.1
	TraesCS2B01G255100LC.1
	TraesCS2B01G256800.1
	TraesCS2B01G257000.1
	TraesCS2B01G259400.1
	TraesCS2B01G260200.1
	TraesCS2B01G262600.1
	TraesCS2B01G263200.1
	TraesCS2B01G264100.2
	TraesCS2B01G267900.1
	TraesCS2B01G271800.1
	TraesCS2B01G274800.1
	TraesCS2B01G275700.1
	TraesCS2B01G278500.1
	TraesCS2B01G279400.1
	TraesCS2B01G279700.1
	TraesCS2B01G280200.1
	TraesCS2B01G280600.1
	TraesCS2B01G281300.1
	TraesCS2B01G282000.1
	TraesCS2B01G284900.1
	TraesCS2B01G285600.1
	TraesCS2B01G287600.1
	TraesCS2B01G287700.1
	TraesCS2B01G291000.1
	TraesCS2B01G292000.3
	TraesCS2B01G292100.1
	TraesCS2B01G294500.1
	TraesCS2B01G295300.1
	TraesCS2B01G295400.1
	TraesCS2B01G296200.1
	TraesCS2B01G296500.1
	TraesCS2B01G296700.1
	TraesCS2B01G297300.1
	TraesCS2B01G298400.1
	TraesCS2B01G300200.2
	TraesCS2B01G301400.2
	TraesCS2B01G303300.1
	TraesCS2B01G304200.1
	TraesCS2B01G304900.1
	TraesCS2B01G305000.1
	TraesCS2B01G305200.1
	TraesCS2B01G306700LC.1
	TraesCS2B01G306800.1
	TraesCS2B01G308000.2
	TraesCS2B01G308600.3
	TraesCS2B01G309500.3
	TraesCS2B01G311900.1
	TraesCS2B01G313700.1
	TraesCS2B01G315300.1
	TraesCS2B01G315600.2
	TraesCS2B01G316300.1
	TraesCS2B01G320000.1
	TraesCS2B01G321000.1
	TraesCS2B01G322400.1
	TraesCS2B01G323100.1
	TraesCS2B01G326700.1
	TraesCS2B01G327200.1
	TraesCS2B01G328200.1
	TraesCS2B01G329100.1
	TraesCS2B01G329300.1
	TraesCS2B01G332300.1
	TraesCS2B01G332900.1
	TraesCS2B01G333300.1
	TraesCS2B01G333900.1
	TraesCS2B01G334800.1
	TraesCS2B01G339700.1
	TraesCS2B01G340500.2
	TraesCS2B01G341200.1
	TraesCS2B01G341400.2
	TraesCS2B01G342200.1
	TraesCS2B01G342600.2
	TraesCS2B01G346200.1
	TraesCS2B01G346800.1
	TraesCS2B01G351400LC.1
	TraesCS2B01G354100.1
	TraesCS2B01G354900.1
	TraesCS2B01G355900.1
	TraesCS2B01G360400.1
	TraesCS2B01G361100.1
	TraesCS2B01G361900.1
	TraesCS2B01G362700.1
	TraesCS2B01G369100.1
	TraesCS2B01G369600.1
	TraesCS2B01G371800.1
	TraesCS2B01G373600.1
	TraesCS2B01G375600.1
	TraesCS2B01G376100.1
	TraesCS2B01G377500.1
	TraesCS2B01G378400.1
	TraesCS2B01G378600.1
	TraesCS2B01G380600.1
	TraesCS2B01G381500.1
	TraesCS2B01G386900.1
	TraesCS2B01G388800.1
	TraesCS2B01G389400.1
	TraesCS2B01G390700.1
	TraesCS2B01G392500.1
	TraesCS2B01G398100.1
	TraesCS2B01G398200.1
	TraesCS2B01G400000.1
	TraesCS2B01G400300.1
	TraesCS2B01G401400.1
	TraesCS2B01G402800.1
	TraesCS2B01G403000.1
	TraesCS2B01G408600.2
	TraesCS2B01G409300.1
	TraesCS2B01G416400.1
	TraesCS2B01G416900.1
	TraesCS2B01G421300LC.1
	TraesCS2B01G423900.1
	TraesCS2B01G425000.1
	TraesCS2B01G425600.1
	TraesCS2B01G426700.1
	TraesCS2B01G427200.1
	TraesCS2B01G429100.1
	TraesCS2B01G429500.1
	TraesCS2B01G440200.4
	TraesCS2B01G442100.1
	TraesCS2B01G442900.4
	TraesCS2B01G443100.1
	TraesCS2B01G443500.1
	TraesCS2B01G444400.2
	TraesCS2B01G445500.1
	TraesCS2B01G446300.1
	TraesCS2B01G450800.2
	TraesCS2B01G450900.1
	TraesCS2B01G453900.1
	TraesCS2B01G455200LC.1
	TraesCS2B01G457000.1
	TraesCS2B01G457600.1
	TraesCS2B01G462800.1
	TraesCS2B01G463500.1
	TraesCS2B01G471000.1
	TraesCS2B01G471300.1
	TraesCS2B01G471800.1
	TraesCS2B01G478100.1
	TraesCS2B01G479800.1
	TraesCS2B01G481600.1
	TraesCS2B01G486000.4
	TraesCS2B01G489600.3
	TraesCS2B01G489800.1
	TraesCS2B01G490700.1
	TraesCS2B01G490800.1
	TraesCS2B01G494100.1
	TraesCS2B01G495700.1
	TraesCS2B01G499600.1
	TraesCS2B01G500300.1
	TraesCS2B01G501000.1
	TraesCS2B01G501200.1
	TraesCS2B01G504900.1
	TraesCS2B01G505100.1
	TraesCS2B01G505500.1
	TraesCS2B01G505600.1
	TraesCS2B01G506600.1
	TraesCS2B01G507500.1
	TraesCS2B01G507700.1
	TraesCS2B01G515500.1
	TraesCS2B01G517000LC.1
	TraesCS2B01G518400.1
	TraesCS2B01G518500.1
	TraesCS2B01G520600.3
	TraesCS2B01G521600.2
	TraesCS2B01G521900LC.1
	TraesCS2B01G523600LC.1
	TraesCS2B01G523700LC.1
	TraesCS2B01G526700.1
	TraesCS2B01G528300.1
	TraesCS2B01G529800.1
	TraesCS2B01G530300.1
	TraesCS2B01G532600.1
	TraesCS2B01G535000.2
	TraesCS2B01G537100.1
	TraesCS2B01G539100LC.1
	TraesCS2B01G540100.2
	TraesCS2B01G546500.2
	TraesCS2B01G546800.2
	TraesCS2B01G549000.1
	TraesCS2B01G549400.1
	TraesCS2B01G549500.1
	TraesCS2B01G553100.1
	TraesCS2B01G555400.2
	TraesCS2B01G556700.1
	TraesCS2B01G557000.2
	TraesCS2B01G562300.1
	TraesCS2B01G567600.1
	TraesCS2B01G575900LC.1
	TraesCS2B01G576300.1
[truncated: 5,760 more rows]
