# Supplementary material for: Proteomics-Based Data Integration of Wheat Cultivars Facing Fusarium graminearum Strains Revealed a Core-Responsive Pattern Controlling Fusarium Head Blight
Source: Front Plant Sci. 2021 May 31;12:644810. doi: 10.3389/fpls.2021.644810 (PMC8201412; doi:10.3389/fpls.2021.644810)
Supplement: Supplementary Table 5 — Table showing the average of wheat protein abundances quantified in the three biological replicates for each cultivar × F. graminearum strain combination and control samples. [file Table_5.XLSX]

## Sheet: sheet1 -1
Supplementary Table S5. Table showing the average of wheat protein abundances quantified in the three biological replicates for each cultivar × F. graminearum strain combination and control samples.
	Cadenza_MDC_FG1	Cadenza_MDC_FG13	Cadenza_MDC_FU01	Cadenza_Mock	Recital_MDC_FG1	Recital_MDC_FG13	Recital_MDC_FU01	Recital_Mock	Renan_MDC_FG1	Renan_MDC_FG13	Renan_MDC_FU01	Renan_Mock
TraesCS1A01G002200.1	8.54122536817565	8.99541275651117	8.59609392909407	8.50628982764028	9.0737234526645	8.66332931496685	8.62653875837348	8.48761909487363	8.60390492299603	8.71648862254716	8.59707130860555	8.4481301847099
TraesCS1A01G005600.3	7.24129448247107	7.04564235977135	7.13540915092599	6.02192092993015	7.01972272074751	6.80098564409339	7.0695228796149	6.0013570978634	7.08272435736483	6.99116258671412	7.17378548952728	6.0781842750749
TraesCS1A01G007400.1	7.30442542725345	5.19662709944188	7.12861761628636	5.19662709944188	5.19662709944188	5.19662709944188	5.19662709944188	5.19662709944188	5.19662709944188	5.19662709944188	5.19662709944188	5.19662709944188
TraesCS1A01G007500.1	9.29195193164167	9.43267868651017	9.33864764265164	9.36078858966304	9.23368873839023	9.28588557613008	9.24347654195971	9.26359108367062	9.3188253097328	9.40994407197909	9.30941567919711	9.15988587234175
TraesCS1A01G007700.1	8.0964026279884	8.17307540604872	8.17575448061294	6.37939758542471	7.66105274147542	8.19019788616047	8.07324901052501	5.77028070457302	8.05695972052068	8.09865894825153	8.07999633427487	6.57377647871874
TraesCS1A01G008000.1	5.88368151845393	6.16249477718293	6.19725656888741	6.30091873362223	5.88368151845393	5.88368151845393	6.41491013311133	5.88368151845393	5.88368151845393	5.88368151845393	5.88368151845393	5.88368151845393
TraesCS1A01G009000.3	7.88738072368202	7.92649141125501	7.98758917017646	7.59930493518492	8.11531778980834	8.2031589787596	8.17124381932471	7.57658349255186	8.04812266216652	8.03188986278531	8.08803703739157	7.37059110518593
TraesCS1A01G011300.1	8.36094870727417	8.26461338143985	8.45548346064508	8.43344042868329	7.54654706315506	7.66788123992585	7.63875033046922	7.89160379603114	8.43734906772531	8.49235164982461	8.43910381894991	8.4504821302736
TraesCS1A01G015400.1	8.84811533689049	9.10397811651484	9.0867523211449	9.14308776127126	9.1956775120698	9.17214029924663	9.14742352870842	9.11119482369427	9.26026872507587	9.24034057808916	9.29292614159505	9.09246198975122
TraesCS1A01G015600.1	8.83767421687478	8.58223695277605	8.59626138571122	8.53207696671339	8.9230815793994	8.55729197219921	8.55553138736224	8.27526081001536	8.6469371284036	8.32408184596471	8.40431792355627	8.21272185073032
TraesCS1A01G017300LC.1	8.84345241478949	8.60913252984193	8.75842333631201	8.43338564690691	8.86247406670279	8.90112295480429	8.68690863712369	8.52143537929923	8.68090189422974	8.75663798633869	8.71295503569662	8.22194654401849
TraesCS1A01G024100.1	7.76601185885789	7.90494945273438	7.81025644006643	7.65759239697736	7.89933576206796	7.92224256211587	7.92693213327429	7.71960077778622	7.7923201275477	7.85232628517501	7.72091307521162	7.42292151663857
TraesCS1A01G027100.1	7.8386371039499	7.84205918074991	7.84342553172298	7.80331301279092	7.7459349306214	7.83886697102457	7.76680011271675	7.708303818883	8.07751176039265	8.03951386143381	8.02532602297785	7.70728858071306
TraesCS1A01G030000.1	7.57623471726207	8.16516119515597	7.70280485219104	6.87504582139378	7.95079825714826	7.91708873954412	7.82850017057548	6.03290341117111	7.78774838128541	7.95490103946819	7.79936035843299	7.06326792641184
TraesCS1A01G030100.1	8.42698939460677	8.64444498604577	8.56626041092668	8.4406735675303	8.29636125335069	8.45474438062367	8.41631971810984	8.10617183879222	8.54250120184071	8.63686484257419	8.56778363352814	8.4781234541869
TraesCS1A01G033000.1	8.05722590269379	8.162042478856	8.09192896971435	8.01925894419836	8.07391647135177	8.10484268765035	8.20368086788629	8.08351332630133	8.09618622460066	7.93808105411236	8.18392876802221	7.95456919202943
TraesCS1A01G033500.1	7.10069412343112	7.292469982377	7.23874357581497	7.50821009763084	7.51721469441732	7.47261306838374	7.53187844133663	7.39642337644935	7.87156780434413	7.94849789694651	7.87593417393664	8.1823555521319
TraesCS1A01G033600.1	7.81230091256701	7.93227496094174	7.91721133956728	8.11689224739459	7.70948951567236	7.79378747874179	7.74819224955152	7.89015876374215	8.26998485423245	8.337534706431	8.25965194184349	8.49318204585789
TraesCS1A01G035000.1	7.49817126596061	7.36437593996159	7.4282424603883	7.34319104216831	7.4003877887929	7.47402432537371	7.5147765455527	7.46982386570678	7.40194687777394	7.36827804016821	7.39632017677311	7.22590470941128
TraesCS1A01G035600.1	8.04719829449389	7.87445274495817	8.04351299553711	7.86612588011219	8.20937585685105	7.97845499636574	8.16678473483486	8.18610127746944	8.3098116181895	8.16544139375521	8.24449399383622	8.05815066266783
TraesCS1A01G035800.1	8.09035328377177	8.16509288458198	8.21847385326012	7.95616209391693	8.08864435068293	8.11810532292038	8.00935633300263	7.07186855834754	8.28190232643136	8.21371743144303	8.19067372236851	7.02005616039302
TraesCS1A01G036200.1	7.12417957964638	7.38806431158165	7.15525449303372	6.86461171312289	7.28137678598523	7.45767487749731	7.40639306124888	7.31264239938982	7.56323447505085	7.55972808575901	7.6219426056606	7.43299157243967
TraesCS1A01G038200.1	10.0936462001077	9.93409110186153	9.86893683576607	10.197733016938	10.2999191566994	9.58473073705538	9.55810822450538	10.3735892481234	10.2705286587084	9.56573598245962	9.55118064583385	10.3609965649434
TraesCS1A01G040600.1	9.45613025027956	9.45678772154323	9.44733546606623	9.3534867769389	9.52229264045579	9.43839019141794	9.44981146299002	9.43446707529149	9.49657459316573	9.48914604218646	9.44758004747968	9.39919065776382
TraesCS1A01G041700.1	8.31656793022857	8.31289674437584	8.3173691016661	8.39305053647725	8.32206152254589	8.37614380172223	8.35332573143008	7.46789669072043	8.34721594301438	8.41836670158668	8.39293928864765	7.18553411090555
TraesCS1A01G045400.1	8.75599073166512	8.78197023618882	8.76838631610851	8.63336307019659	8.77336147439869	8.74227289250159	8.76665641520545	8.62366913823839	8.807235234578	8.83131727939172	8.86850934691752	8.64364267786272
TraesCS1A01G045700.1	9.38520091996268	9.38142303451481	9.39042186927693	9.49276023352031	9.28306138249676	9.4549789117358	9.38835804199947	9.58691288404468	9.36191512960972	9.50623884969832	9.45716123537652	9.54609199330463
TraesCS1A01G045800.1	9.82792306864505	9.80148862718455	9.80609974630099	9.82581198882666	9.62835861836174	9.59854148653684	9.60129319029679	9.75020730405604	9.66295992961096	9.64023874195687	9.60066809261514	9.75864879813727
TraesCS1A01G046300.1	7.40992878510827	7.03142515250147	7.29269054214139	7.49040457597653	6.90360983547605	7.20127503400052	7.15025482668657	7.77816080035695	7.12601748227102	7.2910094143931	7.34552111425338	7.79997270548537
TraesCS1A01G046500.1	8.53919604504898	8.11564963461782	8.14104466530308	8.09332958078216	8.3626012631199	8.16241348880083	8.23558370502796	8.14000633457384	8.41077228786618	8.12890134700084	8.46207268416379	8.04447282622564
TraesCS1A01G046600.1	7.28676405159844	7.38187516091041	7.45311603016015	8.4517532015401	7.62681056151756	7.74234723831123	7.60629584218203	8.63486288420377	7.59657025919766	7.65292010711231	7.57787738750801	8.49134146804357
TraesCS1A01G047000.1	8.26130308737542	8.17018180422319	8.2455006123352	7.37543950036215	8.15418599327277	7.96754581599648	8.02787190493613	6.43963040685424	8.24702121429022	8.32555103346922	8.32702068373332	5.94923840917948
TraesCS1A01G052200.2	8.00017644436782	7.87010613055988	7.97710326967216	8.2407637477498	7.86974930217819	7.80883903952992	7.84987366948908	8.2303730617426	8.08847997548773	7.99584613003328	8.13846892896077	8.22235721877837
TraesCS1A01G054400.2	7.63187253134222	7.64910094654373	7.71390484951345	7.50722455292676	7.67140662698741	7.68645743370714	7.66685627956964	7.68113612636429	7.64641384311258	7.76124623974545	7.6693320941388	7.57946928406133
TraesCS1A01G056600.1	5.79612183021871	5.21808184013062	5.90804956658188	6.23876107429614	6.53968327254093	6.65682150718744	6.7395929645077	6.85792751354598	6.63795199006285	6.50860237895853	6.53960026426218	6.96077573437509
TraesCS1A01G058900.1	6.25122570090782	7.00607141497461	7.01236123389347	5.99966745712383	6.48480007740063	6.55018283038795	6.69449041959684	5.99966745712383	6.7585905937343	6.24284597969051	6.91730760584745	5.99966745712383
TraesCS1A01G064000.1	7.71264930180604	7.82910573853805	7.72874263480889	7.59553910443564	7.50037360707374	7.58475433265771	7.60268635051281	7.62837049529631	7.63559145811661	7.5800472233723	7.64443972201189	7.40282580159503
TraesCS1A01G066100.1	8.20428500282874	8.10505453900147	8.05696127961865	7.94908488275526	8.48844199325441	8.24049557975999	8.14936794976174	8.15336225166445	8.31967805460885	8.43742883693268	8.36095688348414	8.18122072001721
TraesCS1A01G066400.1	9.27949537965617	9.35204079824643	9.31761178825195	9.33703802687853	9.17589809627248	9.0393207445225	9.10406568547651	9.07820177404353	9.22244342979862	9.2964388416559	9.22956542316739	9.37019428722076
TraesCS1A01G067300.1	8.18509368015567	8.27269906031425	8.21898969599103	5.71781628420556	8.27716578377488	8.31251762896028	8.26122740724395	5.87104648943574	8.19093773086884	8.26136644226842	8.18928612451602	5.71781628420556
TraesCS1A01G070300.1	7.0896702661398	7.15097713613422	7.13951528245166	7.16423609171675	7.02740430896437	7.08149583656199	6.9237976751385	7.30188410283425	6.89439813264688	7.2533993275085	7.23454102672944	7.30582530220874
TraesCS1A01G071700.1	7.09928532106125	6.86483501262858	6.97679608006727	5.96326340646845	6.78492104984445	7.40466547960271	7.42620955361441	5.96326340646845	6.99209082614313	6.8732227036463	7.30485308877818	5.96326340646845
TraesCS1A01G072000.1	9.00680175339433	8.94674333448397	8.95281960252529	8.92102545175939	9.04419653632442	9.043638745137	9.02393088693055	8.99110831950871	9.03343273172242	9.01582700148672	9.0577378573148	9.00518712672309
TraesCS1A01G072000LC.1	7.50142670483989	7.3534444261535	7.70562326925443	7.99010087736074	7.36984803239256	7.5227605754625	7.57573326281797	7.85874560074019	7.63015920340408	7.6581956916302	7.45742733317906	8.27696079604209
TraesCS1A01G072100.1	8.14126105650042	8.25981066401526	8.22477920710557	7.86677058834809	8.21055260075249	8.18741276930664	8.04457704750796	7.77481435916002	8.26629407225353	8.3368165320896	8.23428524796743	7.35481258012152
TraesCS1A01G072200.1	9.09966548664383	8.93689311151696	8.91649386153352	8.88141512478693	9.27342588610242	9.03081995426287	8.91940500337689	8.84349005455471	9.16667498264812	8.94750785850238	8.97348939438016	8.81982023127843
TraesCS1A01G072300.1	8.20039667327092	8.25981066401526	8.28240613037042	8.16095925850514	8.36561112818475	8.21793052405712	8.08064480534463	8.15709252156598	8.28663862384287	8.34754520897198	8.24461179543697	7.85724660649159
TraesCS1A01G075000.1	9.1140202276842	9.15674486514941	9.21776530142612	9.44414018949904	9.14533570117337	9.18223138357655	9.16912556408816	9.30956468983035	9.07362899343163	9.17893866254519	9.11914834895329	9.33552882974394
TraesCS1A01G075100.1	8.32816554888243	8.33839039119158	8.36759088939234	8.14638220795961	8.30178110059992	8.40906523567778	8.37235185476724	8.2964776679336	8.23762638421562	8.21229847323037	8.25479034287572	8.25848608437372
TraesCS1A01G076100.1	7.66712677145012	7.46498846279866	7.55060402616188	7.53823947984596	8.07780845361465	8.09181370650694	8.21993368368997	8.1796749991728	8.12500138659895	8.08622773172865	8.16497612501021	8.11601239263199
TraesCS1A01G077700.2	9.00519705419736	9.01848917432329	8.97586042340096	8.84427130014438	8.94501780865461	8.93663937701468	8.9259532461583	8.8699600762863	8.93145592858374	8.85656360232189	8.92377754086104	9.00322890442299
TraesCS1A01G078800.1	9.11264485595154	9.03364534945829	8.99915011950198	9.0055155048821	9.25889562573873	9.17273686685581	9.10585837441891	8.94348286335206	9.25461966482312	9.26865049519025	9.20007198014958	8.99752767542214
TraesCS1A01G078900.1	8.8057803477988	8.73502613622958	8.68616304547032	8.71042676512626	8.95372505671651	8.87421167410124	8.81909160010901	8.68935399868151	8.94793830678377	8.9616415923531	8.96691677744144	8.78521670351247
TraesCS1A01G082000.1	7.95304338252823	8.12399476636488	7.94321333976997	7.79369266613727	8.20765380279609	8.20134515258972	8.11398119197609	7.73411047363347	8.09133337854374	8.08264766056066	8.10529803916489	7.72248727409306
TraesCS1A01G082200.1	8.0081016140226	7.69824738485058	7.70230567059104	7.47304783274411	8.22483101563519	7.88391418670337	7.80428589552357	7.7139835006697	7.98774681796566	7.84920033598592	7.81338797922896	7.79506319587611
TraesCS1A01G085600.1	9.45782408380179	9.33420620092185	9.33829595638039	9.37002105832371	9.5631577983369	9.4012496079414	9.36003335760536	9.39882142097063	9.4819112055792	9.38912834046631	9.45256366808413	9.32916042342176
TraesCS1A01G088000.2	8.09663352640082	8.01688375415573	8.12699261876968	8.19713839780617	8.22325123948615	8.23853589088638	8.26741230459676	8.15559809788126	8.13234606720156	8.07449857798543	8.15283266330785	8.38485791864134
TraesCS1A01G088100.2	6.99874090552144	7.05531626187681	7.15046914852368	5.41556401433739	7.22588875215124	7.14376045951473	7.24575183678828	5.41556401433739	7.2470875476284	7.13044982756864	7.16465931153229	5.41556401433739
TraesCS1A01G088700.1	8.84958338728786	8.84966645594986	8.8031189896585	8.79553702530454	8.56889224363405	8.75629755417252	8.73622205579054	8.85030135774847	8.57825546328302	8.53182658677923	8.56486186029128	8.46070260289352
TraesCS1A01G089500.1	8.19493505500239	7.67945222564763	7.61352975724332	7.81785863297771	8.36277417282164	8.07909903475609	7.75488136506315	7.73170002491071	8.50396068558122	8.14345814217843	8.09504260776956	7.83870367800316
TraesCS1A01G089900.1	8.96178762728817	8.83244990310888	8.8931586651828	8.51354888670079	8.962895345314	8.93034873638523	8.92163929645559	8.65222741978834	8.8880088386939	8.84922939607589	8.90680922911461	8.66815629324632
TraesCS1A01G090000.1	8.89969530765981	8.83585733476482	8.872163679834	8.5130361882979	8.91042134817617	8.87222789238626	8.86261914443831	8.68700907922861	8.86374727369353	8.82430277899125	8.89983581941984	8.65938363183971
TraesCS1A01G090600.1	8.18395927225965	8.1538302824054	8.15805925017022	8.3829612470226	8.09103630734573	8.05128612511653	7.81821483463861	8.18984038896576	8.06626437381563	8.1001796247678	8.06983833635275	8.08105960237154
TraesCS1A01G091100.1	8.83024270901377	8.70208773559237	8.80715824418724	8.26268617248197	8.55512253360682	8.77252254850285	8.75453395525366	8.39596475279184	8.93675421226497	8.94820661697312	8.96247346531334	8.32048038141602
TraesCS1A01G092700.2	9.03675649013646	8.93484886128909	8.99110146680448	8.90338656678538	9.04481431919827	8.96696258438479	8.9720426290682	8.96436221913724	9.04659440030748	8.99953577769407	9.05203910473634	8.97453836335782
TraesCS1A01G092900.1	9.82049265045565	9.70090013024895	9.67359391872467	9.95365972105601	9.94824326183675	9.86935057766358	9.90109366634205	10.0591895416445	9.902195453183	9.88952805837737	9.92293125735835	10.0406615339559
TraesCS1A01G093900.3	9.02322632387812	8.97070681873213	8.99253612505687	8.94613351167009	8.98641505874687	8.91342056019263	8.93319300895775	8.98752778856549	8.91704147685147	8.96148311848109	8.8815934998946	9.00639063111035
TraesCS1A01G094700.2	9.55531055496978	9.44192436805208	9.56469072051493	9.63366485304651	9.64635708250104	9.65153999572361	9.59981159087254	9.80787867538997	9.24410635771923	9.02029431589591	9.23774779269802	9.13450713047939
TraesCS1A01G095500.1	7.76092577774745	7.9232066595724	7.82237369244891	7.45967190416698	7.8728282361988	7.85335972951293	7.82253524838077	7.44888430757025	7.76936170211666	7.66938159836055	7.77004819073758	7.23148709154599
TraesCS1A01G096000.1	7.99474574374273	7.95358210672648	7.98839250913288	7.83198600120404	7.89915029675767	7.95034795653531	7.99499777064169	7.94698848086842	7.87633985276548	7.96399623091372	7.96023214486501	7.84635182153726
TraesCS1A01G096200.2	8.8358472775971	8.87286967865468	8.87856633223323	8.78204466562682	8.83151763914406	8.73896400278815	8.84057994781367	8.85674302245098	8.81840232813318	8.84678307649526	8.80310655741442	8.92577206351195
TraesCS1A01G097000.1	7.96757537999956	8.25937345653923	8.11473371703226	8.30151301563104	7.94698887148195	7.91505611579633	7.94479458158792	6.80857768859928	8.09124464167414	8.19173946397277	8.07755597141593	8.08100671616273
TraesCS1A01G097200.1	7.11117027441337	7.32274230694851	7.18359216131383	7.04833135442908	7.24119342322077	7.38067910072457	7.26959127198061	6.57553440453344	7.3945274117995	7.3897811202444	7.34027887524442	6.57553440453344
TraesCS1A01G097400.1	9.48694395383137	9.47416081173282	9.4842821690074	9.45495239801816	9.45094164951714	9.52960455893115	9.57509823485474	9.48874083847052	9.53636606157389	9.49208171401043	9.55163180316187	9.43275161466974
TraesCS1A01G097700.1	9.32303430969717	9.36783285390509	9.33136477083518	9.24028866279741	9.38001421317369	9.33816044935049	9.31152934446749	9.30402869807244	9.35216160589419	9.28175545227104	9.3414978855834	9.243973918888
TraesCS1A01G099300.1	7.87976185078019	7.94315352857916	7.96727452845526	7.9030119039712	8.03333610379492	7.97877743617348	8.07181642071671	7.68692364852272	7.97096637924812	7.75893962423728	7.92844683930499	7.59702698944072
TraesCS1A01G099400.1	8.47773730205892	8.26074578421716	8.42972660035027	8.30730644309978	8.55283826407217	8.37979416354966	8.49944014037965	8.34411604345353	8.30839163526889	8.38454446698754	8.22992408602419	8.21999504596954
TraesCS1A01G099500.2	9.34130030134036	9.34305876992108	9.34401347437468	9.4134173646176	9.29267054869957	9.28628281999311	9.28897506490146	9.39369390214767	9.22619683485047	9.26547608174112	9.27322121171545	9.35443611788911
TraesCS1A01G100600.1	8.45301038145239	8.49072239466721	8.53799249385137	8.43787314140117	8.4273261854851	8.35206178297872	8.39907009349247	8.19000494164777	8.54748195634978	8.55570835270801	8.57145139576486	8.57402935860857
TraesCS1A01G101000.2	8.98247185091706	9.12406094472913	9.08309375336455	8.67791210400259	8.79659059066666	8.95738017246282	9.02576684605142	8.57162676956323	8.86416685210343	9.01115351086063	8.87371626291968	8.54472473477907
TraesCS1A01G102500.1	7.88541720870669	7.86816894525418	7.91663845035548	7.88940678504382	7.73763401466569	7.85465388819368	7.94044399980771	7.77226293689316	7.82000581872941	7.84188659365237	7.98131237802014	7.66723974210811
TraesCS1A01G102700.1	8.23303957751592	8.19844905055701	8.19285205717164	8.18423221486953	8.32031225282479	8.21924467372724	8.08134239721253	7.94764118928291	8.39207085122102	8.33452794648918	8.29502181815999	8.08202415749414
TraesCS1A01G102900.1	7.86922491266611	7.76091086507325	7.72409853852926	7.76629783811805	8.10546521244422	7.92443832727784	7.81205456272707	6.19428774915978	8.03495530258561	8.09466942749264	8.0411264295538	6.19428774915978
TraesCS1A01G103600.1	9.16550372796009	9.09142017250095	9.15887174764337	9.25273027788142	9.14417984333097	9.08397407901426	9.15755482773848	9.27947649733475	9.12008551429411	9.03711893289729	9.15858611416115	9.21163071168378
TraesCS1A01G105400.1	9.7329846098626	9.63344433831743	9.75406819943325	9.71646627913061	9.8299768720602	9.78404310076695	9.75342696343081	9.68765951462684	9.81963098744292	9.8632756839561	9.83178571151484	9.66027597449148
TraesCS1A01G105500.1	7.79539068357478	7.40842454455017	7.95173103794555	7.91104171371487	7.58530341667366	7.81511939313905	7.47511184810589	7.80549220612856	7.95181887305106	7.96153970058473	8.13015222056996	8.08481616973754
TraesCS1A01G105600.1	9.8130825451661	9.77984771443354	9.78065843914617	9.98320321921878	9.88802948649703	9.79529039640606	9.7813983602223	10.0396629784259	9.82323389775963	9.83527832803348	9.78481351419784	10.1205414166604
TraesCS1A01G105800.1	7.3202732540332	7.22620228907614	7.32623751136632	7.43868376689468	6.98440351930611	7.27271394333623	7.3628717972123	7.62510732433017	6.95632163332202	7.50242946680718	7.00103057726648	7.43612703180926
TraesCS1A01G105900.1	7.43030171101968	7.03246063112823	7.40935734926689	7.17175132210674	7.53844596874287	7.35786655866386	7.28263358727443	7.29532238345026	7.18932464847648	6.86662072423962	7.20171098287457	6.9182022656287
TraesCS1A01G106600.1	8.77441994412926	8.78659536279524	8.74059172476258	8.70381645684266	8.77229701931475	8.81929810552637	8.82606971170147	8.8425407783958	8.92470233002073	8.99527496508139	8.92708027226785	8.93064270555975
TraesCS1A01G107100.1	7.25712410068495	7.50231748437631	7.59301122710417	7.53139789989418	6.87601549612156	7.13909472617804	6.98469823407539	7.42433071817074	5.28184348396709	5.28184348396709	5.28184348396709	5.28184348396709
TraesCS1A01G107200.2	8.2847334940836	8.13219146695904	8.23772949151927	8.04222705677924	8.17591459042239	8.13343688966633	8.11519662367585	8.02900907640651	8.08190066629226	8.19436293998164	8.10346767075853	8.25690228064909
TraesCS1A01G107800.1	8.84173742041799	8.85931588827675	8.84415060813237	8.80035889836706	8.88760837736292	8.90797945520945	8.88120741445544	8.80786406425325	8.85221020400273	8.85008690799837	8.83162113999306	8.72051234247581
TraesCS1A01G108300.1	8.08953949885265	8.12318908746141	8.11247428110979	7.97108582119793	8.08965050204669	8.19709032672326	8.05155463329861	7.79809598897726	8.04646127474065	8.12421909579241	8.1076953558802	7.47273752849051
TraesCS1A01G109200.1	7.55831224318221	7.32477021597943	7.39966001641739	7.34431498942952	7.56987840878092	7.4372875356817	7.64843921212147	7.66308828559316	7.47015638565571	7.25971064433724	7.30375660789642	7.65309083236244
TraesCS1A01G110200.1	7.77120187464178	7.91764329276346	7.83416686087734	7.3149853808843	7.90978175243614	7.8756816106029	7.89208571038213	7.54993291061844	7.67153954333723	7.82491853582943	7.69325484364726	6.9288300441875
TraesCS1A01G110300.1	9.15512489379111	9.0608787336836	9.13125246323657	9.03921013021106	9.0645200263344	9.04646461566564	9.07310198554694	9.03938501107462	9.15182888104024	9.11458443164251	9.19748984392143	9.03878743282511
TraesCS1A01G110900.1	9.13690415764647	9.30038694033174	9.23016997218811	9.03602112578425	9.26654033031711	9.2770857524784	9.23816807530207	8.81388844603909	9.34409176938313	9.33079477082547	9.29491727873247	9.12360014760792
TraesCS1A01G112500.1	9.30924426467566	8.95568186843309	9.07772929845075	9.55807853345612	9.65798297309493	9.62943910181443	9.55977815207618	9.58873497596109	9.57520355209457	9.56627773106965	9.58338898669862	9.43564214389986
TraesCS1A01G112800.1	8.33454173382388	8.32196851086921	8.41204348014998	8.25124492825031	8.15162216347909	8.16437111356512	8.30576127782007	7.9488360480389	8.34128763272024	8.3526587923388	8.28330503700029	7.94560882868921
TraesCS1A01G112900.1	7.58760285419685	7.25462584343439	7.58959614824164	7.12015893686941	7.69279842756303	7.64883445663945	7.44714311559027	7.13183919696232	7.53040668566045	7.55085459603721	7.42246624480688	7.11670627512103
TraesCS1A01G115400.1	8.17510786411837	7.8582263799009	8.06338630723066	8.1835818405348	7.79559071759945	7.8243962479266	7.9551434758453	8.24260154389935	7.37134149492096	7.34657650800173	7.44734888954815	7.64375808579536
TraesCS1A01G120100.4	9.5923295111691	9.61820701948304	9.61377989478616	9.47100945701535	9.65954901416628	9.6138227073224	9.62422216974732	9.46703497329027	9.56707798784031	9.57767588210949	9.56998043426131	9.36354239733007
TraesCS1A01G120200.1	9.71324927645581	9.7435570085067	9.74140317205384	9.60338886226556	9.77539477336936	9.73505224509426	9.74980219503091	9.59248329288326	9.71656966947285	9.72864555368426	9.71231816160269	9.53377684424032
TraesCS1A01G120900.2	7.3970167834983	7.32928317828194	7.38889461806425	7.47043103094865	7.43196732632629	7.47605250540188	7.32511156485545	7.64683786600945	7.70716385250872	7.68398485634679	7.74141725835487	7.59632011133465
TraesCS1A01G121000.1	8.47890254108733	8.40994943603227	8.43608662486253	8.50780521628769	8.36505747751321	8.32133598452365	8.34527492335037	8.61424605250069	8.38418923356784	8.40689312786532	8.39891013047025	8.27914113777108
TraesCS1A01G122000.1	7.95407123465695	8.0838112439604	7.94669784657078	7.63231909606437	7.87925096520325	7.82261621451861	8.00850559352823	7.62379823876927	7.71545224012846	7.79979954332737	8.16467106907845	7.85675349290873
TraesCS1A01G122500.1	9.61134783397762	9.45337239786423	9.51897390978613	9.75365296550202	9.74685708979615	9.71443831692219	9.54342602131613	9.44688171183704	9.64817583456107	9.56070927387168	9.52874341399681	9.92597968484642
TraesCS1A01G122700.1	8.77529095846992	8.85084471716595	8.80645026835191	9.01199466943175	8.82361152763146	8.81544868487094	8.82719424893773	8.89359351006355	8.78477014471873	8.99147356223924	8.96901023697125	8.96779221367746
TraesCS1A01G123900.2	7.33899662188185	7.19165974117317	7.30164908456009	7.70312539785505	7.40036537946704	7.26058866694465	7.30966670194602	7.53651261006474	7.26635483348515	7.29230547268026	7.27326508423418	7.45936061077055
TraesCS1A01G124200.1	8.54579364571652	8.40741127014574	8.4584886284607	7.90178086565764	8.37529503741448	7.94818229506477	8.435727689086	7.72560475725864	8.6360617739822	8.48351557892272	8.68622613217736	7.56900704731166
TraesCS1A01G124600.1	9.46211829880997	9.42527444070289	9.43506003341118	9.4357347756636	9.5093316042628	9.50239994676683	9.47014318958241	9.6074582676238	9.45653900335355	9.46772069469837	9.47051366285181	9.54512476338098
TraesCS1A01G127000.1	8.32853982745526	7.87457796732579	8.20328013282481	8.12187847651336	8.29298635292277	7.62266566546235	8.23348668751626	8.21778304149205	8.35011020175482	8.27558817014442	7.58981938640987	8.24270908435376
TraesCS1A01G127900.1	7.37940026537386	6.67414003781834	7.17234252713468	7.27842089232416	7.09274107447209	7.05132299094456	7.08775435695501	7.27015335671559	6.71645089256174	6.70412416306598	7.216061496179	6.91527068893024
TraesCS1A01G128600.1	8.14047828554637	7.96345095975439	8.02916188348017	8.26597640869767	7.97003795832659	7.86002100283085	7.86788841392091	8.27394122124903	8.03020471910227	8.05856894924561	8.11694033348714	8.34503288588087
TraesCS1A01G129100.1	8.7895415474117	8.77994338716879	8.73088993619265	8.78070703030992	8.85323469041198	8.92945866491876	8.83009499729555	8.84564352498803	8.81296407840384	8.8536114389425	8.79627215998711	8.44010196153789
TraesCS1A01G129100LC.1	8.76886057442437	8.62206777595082	8.68843554177405	8.76794312589676	8.77795730142599	8.76331855809144	8.75737331024536	8.83272879804313	8.76450410026681	8.82582967724091	8.70459112203871	8.80664012009451
TraesCS1A01G129200.1	7.48959576279532	7.50833890964642	7.52158792164894	8.15961144714295	7.49681342024309	7.53085282421933	7.51214978810523	8.1031923445303	7.34554867169227	7.39236876756475	7.42274334912621	8.13712873182179
TraesCS1A01G130000LC.1	9.03492635278676	8.83892467937755	8.99194328659796	8.95539516150154	8.95628391603252	8.95441368397405	8.96359763231966	9.09225167008105	8.92936848217088	8.90838492154355	8.92296372872455	8.98285505339028
TraesCS1A01G130800.1	8.19971463977451	8.2463234117973	8.20104739254922	7.88181809247333	8.2211040242176	8.25565798499713	8.24872739031039	8.23186793641479	8.16443038041821	8.20379892926059	8.17790989640636	7.70209983355978
TraesCS1A01G131500.2	8.82180619893292	8.60576571419133	8.64170569143709	9.28789881187324	8.78617694091233	8.78969000018739	8.74075788115043	9.27916091786546	8.82050646664072	8.70764563713642	8.85238215650402	9.40038143975603
TraesCS1A01G132400.1	10.0697918781572	9.91277102369343	9.86143975188101	10.1824136922412	10.2372942995451	8.98719214193373	9.08766742317247	10.3277857306591	10.231267928663	9.08362528488616	9.09138553938522	10.3302870560699
TraesCS1A01G133100.2	9.61725200944043	9.66519450251422	9.65050919940025	9.71170318817175	9.480338518885	9.52602441654217	9.59050117234123	9.74788649781354	9.65591662129104	9.70308348198731	9.71330733957177	9.83872155575305
TraesCS1A01G133700.4	8.48148784740076	8.64332327893749	8.53167997550465	8.36799034017185	8.65094327938891	8.47770748403005	8.47764535210819	8.26005293235569	8.50483092980896	8.48542118826831	8.40155164446882	8.32848692684354
TraesCS1A01G134600LC.1	8.25232830872325	8.1174426439745	8.19231907534323	8.09154047730051	8.21021307605606	8.16672851390186	8.14101879259748	7.79739898020276	8.1330644121236	8.13929937659903	8.1583671038234	7.9114814661387
TraesCS1A01G135700.1	6.80655317937959	6.64975536575329	7.27490383475111	7.42704676574368	7.31106200209937	7.35165610087204	7.34936616735468	7.39607773954208	6.83041915409989	7.25099001507722	7.23766235084987	7.44708717574308
TraesCS1A01G136100.1	8.07686677156456	8.0832710371152	8.14815652990362	7.72414152669062	8.17396545737999	8.12528772179856	8.15081754859437	7.62256408966767	8.16692194102725	8.16758372887982	8.18295752390154	7.55909175688034
TraesCS1A01G137800.3	6.21814262477696	6.12947825316227	6.33676476624688	5.80893633804108	7.28816683413847	6.35622253993853	6.25256992560071	5.80893633804108	6.35559146067801	6.36289189604092	6.36277352211196	5.80893633804108
TraesCS1A01G137900.1	8.45611429659789	8.35424351851492	8.41235635091002	8.35284132543229	8.47408444295604	8.38215742712788	8.48346427131399	8.49590701978591	8.34750402925501	8.32305586481264	8.35336002209601	8.42530454930799
TraesCS1A01G138500.3	7.20048986286463	7.35975736196822	7.21963134489343	7.59337158672742	7.48280799685173	7.47359714883998	7.37219819681203	7.73946831921055	6.74852925028577	7.17342353074211	6.89562288605841	7.5435681242132
TraesCS1A01G138800.1	9.46267849748164	9.45251575721035	9.4400366802325	9.42342433376405	9.4381690883534	9.4491130852264	9.42459474359259	9.50536841252356	9.45111538307829	9.36265905897365	9.46883616599298	9.52267779670077
TraesCS1A01G139300.1	7.70079115264329	7.84621122704164	7.80632709800066	7.7702226986983	7.56412167050037	7.67426236054721	7.68771051742523	7.65411510294169	7.71049073426278	7.80042980554148	7.76470888368622	7.77040368468925
TraesCS1A01G140100.1	8.7451162313956	8.54651459351962	8.67534690296005	8.798691757187	8.6782506216206	8.80979399829587	8.78113040546533	8.97290889000672	8.91077101640983	8.91900365618507	8.90810740191647	9.10740988288273
TraesCS1A01G142000.1	8.96056278830675	8.73892618073669	8.99319419143215	8.96393104938897	8.72610273793831	8.57628272926291	8.86627265083573	9.04542676528792	8.76917847757732	9.00426512650585	9.08925726472407	9.30201682246767
TraesCS1A01G142800.3	8.98251890924801	9.12251665078267	9.08682837979545	8.68661867453267	8.80984983151847	8.95920506383443	9.01246359228224	8.57162676956323	8.87157859887552	8.99928925944084	8.85776670579548	8.56109686368386
TraesCS1A01G142900.1	7.75283578289108	7.46201554567219	7.70665363381466	7.50955481718635	7.7777622231849	7.79182625678964	7.69093325814908	7.90176540837323	7.62787972416789	7.71006880716136	7.53110226828057	7.9340332066167
TraesCS1A01G143000.1	8.80634936125412	8.62849679436837	8.80831113377887	8.7075215573389	8.86452950745721	8.82874726049826	8.80905929723869	8.77475295063149	8.88314914768671	8.85829395479966	8.84293475804633	8.61478650729142
TraesCS1A01G143500.1	7.62573162757924	7.53760761809009	7.61320688569625	7.76776982870721	7.54350913031316	7.64833031319336	7.54446498852816	7.78668327832181	7.58851372032058	7.54410067655163	7.66688874798637	7.59705198399301
TraesCS1A01G143800.1	7.7799629438153	7.81041776815224	7.79244672209678	7.80224825501626	7.67416335932814	7.6433449627467	7.6423640329322	7.97417020833735	7.7594337479425	8.14038363558501	7.78060702401805	7.8750457017964
TraesCS1A01G143900.2	9.13608174314089	9.03333829139562	9.05169658372974	9.04898854530214	9.05306300751995	9.02520437443352	9.06832090248221	9.04286417969279	9.10359034411109	9.05580292226749	9.12231421497149	9.0455053571187
TraesCS1A01G145000.1	9.54904443933918	9.52478485491202	9.51601297833629	9.58659534982326	9.60623538405028	9.6168900381792	9.63260350182917	9.60002013987361	9.60477462908524	9.68203481607166	9.63379697989453	9.57052741965835
TraesCS1A01G145800.1	8.75921125384809	8.75379686913307	8.75740128026936	8.75826020377419	8.77044916234004	8.67454721917038	8.72683864077668	8.60251662836761	8.6693886387901	8.65545078981449	8.69614244225206	8.54444211603691
TraesCS1A01G146000.1	8.24153082946426	8.04320859947739	8.06714854641132	8.08471826249901	8.286236978695	8.25188008796123	8.20130148518569	8.30159020688516	8.22788145561868	8.37696324772105	8.24748675947422	8.08878185483268
TraesCS1A01G146200.1	7.51237275900134	7.74853476506382	7.80141460766258	7.19343877543424	7.68927814812574	7.72703488464675	7.73544105575609	7.59791873328386	7.59555707783057	7.48745746595256	7.57176026708221	7.6465801260191
TraesCS1A01G147000.1	9.0158966935287	8.7571208670303	8.90394965168271	9.11396017983456	9.32200327489004	9.17460022508483	9.09073522618286	9.15297390054233	9.17236689640372	9.25979290458491	9.17783123294173	9.0894053334391
TraesCS1A01G147700.1	7.42053175591709	7.40947122768461	6.97393053444265	7.07014718154822	7.47885883641921	7.51174103084101	7.45112361782468	7.8597954373507	7.50977316148273	7.47049618882711	7.48346438034286	7.70389286000065
TraesCS1A01G148600.1	8.77349863971945	8.64443984385419	8.65248775290003	8.26059325094424	8.27032851518654	8.46195293538491	8.30682072502521	8.16820392750602	8.66144443336222	8.48045068464159	8.70921609370069	8.41638102565532
TraesCS1A01G150600.1	8.43876518539849	8.53692637549657	8.46988476828983	8.35767048909004	8.37512856698087	8.46561003018949	8.53099741245669	8.03802933001238	8.46773771236886	8.31920990849267	8.29778652111576	8.09492123371486
TraesCS1A01G151500.1	7.29271180792449	7.20421089170367	7.20289507621677	6.98583109849938	6.91112140392453	7.11668919455468	7.28379690200457	7.02840428413914	7.29210231618434	7.23836389334938	7.33884536499365	6.84008053841445
TraesCS1A01G152500.1	8.95681349618005	8.99082793843924	8.90169711551154	8.84796163052268	8.99206598026364	8.87970859999143	8.82038426601279	8.83551920087342	8.93687375403152	8.86097401558358	8.9223299754178	8.72716702389814
TraesCS1A01G152600.1	7.79171049892593	7.59653452609277	7.62674829968799	7.34910145386169	6.94653373814457	7.03958004413781	6.9391646555303	6.20223852409884	7.2689389134078	7.61261104108462	7.49778662259595	8.32068356953878
TraesCS1A01G152800.1	7.5376836687377	7.36375562978735	7.46394331932922	7.87840036142075	6.62320998198494	6.50398489135789	6.36884476225486	7.49828292291648	7.75644925140084	7.74121246123326	7.72366016079254	8.68441705862791
TraesCS1A01G153300.1	8.45371298135208	8.53016533986165	8.58837283799697	7.64460530001736	8.33985955944194	8.31107505224044	8.38211241800496	7.3833124882882	8.52914478726026	8.51574543555648	8.17985597439644	7.34695994879009
TraesCS1A01G153900.1	8.41938976237946	8.39150210308391	8.41766652792461	8.45410292420894	8.4857111887137	8.50313745091658	8.54084179551197	8.44546895822116	8.45152076197147	8.43596115971967	8.45278100616953	8.43976248679928
TraesCS1A01G154300.4	7.09462368874463	7.26740537432203	7.16619495910401	6.85717460166195	7.42191851913529	7.55532701571317	7.3818154234519	6.95406626552032	7.40146247288765	7.32301755410873	7.36066259090512	6.63539113258133
TraesCS1A01G154400.2	7.10752355393792	6.96105604669829	7.04615430957779	7.08748391606	7.03142426150783	7.14191344732562	7.11384360159608	7.1898187634872	7.13840971543244	7.15104541022694	7.08932368857116	7.05983921086477
TraesCS1A01G154400LC.1	6.92836060103444	6.45861414191718	5.67856919902353	5.67856919902353	7.52459900488357	6.89249488591776	5.67856919902353	5.67856919902353	6.96237151459294	6.44650308377949	6.79867759627839	5.67856919902353
TraesCS1A01G154700.2	7.59912566880754	7.35207910044793	7.36602197234697	6.6888952926008	7.37536019126668	7.35705790242238	7.4430294039707	6.12959079793784	7.41103784532013	7.5001150008359	7.43728180701791	7.62961537069675
TraesCS1A01G155200.1	10.1561298802935	10.0450249682467	10.1164075348386	10.1642610763151	10.134593143344	10.0931952003138	10.1230154541901	10.2723700280111	10.0945254104176	10.0244568955348	10.0996338027663	10.1708479041147
TraesCS1A01G158300.1	7.53996915702699	7.39376606849559	7.50240797173385	7.65559166112667	7.56246714567297	7.58810465743389	7.40447092780111	7.38621650015305	7.36638841016106	7.51322026769397	7.38630117587343	7.67263493401084
TraesCS1A01G158500.1	7.85534349800869	7.83458612181231	7.92015183510125	7.67389101654982	7.93696301335068	7.93253432279443	7.96531360405255	7.72743640163472	7.92954481086717	7.91223175493163	7.91809930684001	7.817316452569
TraesCS1A01G158700.1	9.66388403323913	9.51154950784706	9.57426945884913	9.74520253657856	9.84649549621768	9.79279129971825	9.80333421588781	9.88246008182607	9.80155986723418	9.76276113856017	9.80298059692042	9.87206596907243
TraesCS1A01G158800.1	8.40529363485433	8.33768612060492	8.39720067539944	8.22204373422601	8.35323232381503	8.36968570639177	8.41817927554066	8.39063370440989	8.44877033345801	8.44806632416297	8.48713708428439	8.49004990711679
TraesCS1A01G159100.1	9.31472244290351	9.22230412568055	9.17288116260247	9.24495835084742	9.24421500509746	9.22487670316415	9.23985628631881	9.32165943389554	9.23584910059777	9.31123397667404	9.24681050617929	9.34698096122674
TraesCS1A01G159300.1	8.3288949971417	8.39662129274607	8.32415154805423	8.37987720980451	8.3063582733209	8.31817940221449	8.23720712279569	8.27541603698807	8.18785302121341	8.21628577978237	8.19682399604407	8.36260099411904
TraesCS1A01G164900.1	8.82833535630494	8.78111167759139	8.82558995554807	8.85987904671223	8.81641651955648	8.76778070669219	8.85921547874488	8.96034347379451	8.81700341768735	8.73207132470156	8.83871894990895	8.82598975518671
TraesCS1A01G165300.1	7.17730694053996	7.53450940063579	7.31174657857503	6.97348908439479	7.88618700427527	7.63920739408626	7.54094635765047	7.25454174487087	7.27755427112642	7.22517442362997	7.05472291074995	6.92875733191537
TraesCS1A01G165700.1	9.47828620059096	9.48984728819241	9.49613758732279	9.44709617530054	9.22688330554212	9.23824989234854	9.29992904851521	9.28379248567412	9.56192702936298	9.56797334869612	9.58107994717262	9.60032670596205
TraesCS1A01G165800.1	9.42314013944765	9.37670296781034	9.40618434633838	9.35706653423969	9.27992047577331	9.26442614571457	9.30215466542161	9.3712829143466	9.36821444745945	9.45567087749142	9.38898886277279	9.48980670239388
TraesCS1A01G166100.1	7.5506163211849	7.4519919161461	7.59122111326602	7.36340473522021	7.57935910675256	7.48088135120087	7.52594720930091	7.3472154365493	7.6925100182121	7.62535993634697	7.78259882553643	7.30566976944531
TraesCS1A01G168100.1	7.66114710047246	7.65005141514117	7.66163277930047	7.35237161502243	7.86563203598517	7.81638518535193	7.7534287641003	7.26031642501146	7.81969699454393	7.76649022270412	7.77621058615497	7.11331597382264
TraesCS1A01G168400.1	7.97072012338476	8.6539391415957	8.67887202519733	7.69999777605804	8.81083501284589	8.73099090850595	8.73050673976989	7.34330635893368	8.791544930018	8.70907563467765	8.80057853725655	7.47011602171353
TraesCS1A01G168900.1	8.74132401145167	8.77184167787272	8.77648148842895	8.6532326195966	8.74287138277665	8.7631318734723	8.77511690337246	8.55821467889361	8.98247921872054	8.9435139365388	9.00720831911101	8.58089150966325
TraesCS1A01G170300.1	7.27309277096233	7.21932962935865	7.29665052401789	6.73396689984931	7.17954397966661	7.22591414907495	7.34385224926285	6.9405272960912	7.14181078414816	7.08421336745563	7.15156709387238	6.7723626069558
TraesCS1A01G170600.1	8.41126423567561	8.43990830735609	8.51528638499322	8.46246034841451	8.45840564783983	8.3878332437871	8.5275648846555	8.48099552381554	8.50827793345655	8.4712179076063	8.61194162095196	8.53780796051812
TraesCS1A01G171000.1	9.17879088407105	9.20679810592648	9.21480804790885	9.40507217584202	8.96896757469836	9.06280610772794	9.1072995268132	9.50533844909062	8.96890966707527	8.97906028629088	9.01423856460642	9.52059490039125
TraesCS1A01G173200.3	8.16039745884302	8.02636278693413	8.18395396341086	8.10152378643955	8.20685879720659	8.19701156555788	8.25296025276711	7.75974116404139	8.2310748664034	7.98973056171733	8.24090758021269	7.75495485861356
TraesCS1A01G174000.2	9.13617074578156	9.1738800319518	9.15842501993701	9.03250496466112	9.18499022018499	9.18040887576898	9.20516627490526	9.01999679449903	9.1995257927373	9.1822050613106	9.16311214004331	9.03516448772661
TraesCS1A01G174600.1	8.66081443819986	8.63199299573003	8.65864160357131	8.78568647261899	8.73408256779945	8.73927491315577	8.76632412374354	8.79403012898371	8.65118965410646	8.62590425710842	8.60466160863592	8.6542959378095
TraesCS1A01G175200.1	8.26420152569276	8.23121539358883	8.21107764310985	7.82610406726526	8.21398833513028	8.21419743069968	8.32765634150249	7.87567644795122	8.31968924371288	8.37386165990547	8.44058339975352	8.02405928158601
TraesCS1A01G175900.1	8.66970526671341	8.63353716010424	8.64546586863024	8.73427653381201	8.65863557903235	8.56315930476832	8.51158087684593	8.50755882437535	8.74348312681931	8.77525297465484	8.76453514464053	8.58465983796013
TraesCS1A01G176500.1	8.12633595419565	7.98583950535144	7.9513578443007	8.08709596797614	8.00895019467286	7.85577400644764	7.98592640981704	7.99591562107309	8.04712335840515	8.01637792222327	8.03936824008351	8.26599923926037
TraesCS1A01G177700.1	8.10613282444795	7.99922143515726	8.06177513599394	7.96730501984543	8.1945828633067	8.26825321204672	8.21384410653176	8.0891058459059	8.20565362009271	8.14665778503081	8.21564545476013	8.02122561235807
TraesCS1A01G177800.1	7.65017364935022	7.54225060114875	7.72949115843939	8.41483699418471	7.4737739629052	7.45812870642335	7.57200023017269	8.54804618684144	6.9945390780131	7.27280769136781	6.92319357727985	8.84959709355589
TraesCS1A01G178300.1	8.77171297076149	8.74854304243233	8.7811204672841	8.83470177956648	8.80514752898801	8.76427355918077	8.8050162432774	8.74008044246812	8.76232552656092	8.78653846782671	8.77557488861022	8.74194141939775
TraesCS1A01G179000.2	10.4441507515771	10.4559148898001	10.4876485402245	10.410507903339	10.4406712159405	10.388363786689	10.463419839698	10.5182823815685	10.3394722335306	10.3440660621452	10.3826083101789	10.4806618012924
TraesCS1A01G179500.1	8.28594564671829	8.16402447250907	8.19530961675989	7.24827566694232	8.23037877781543	8.21504329132026	8.2682977892775	8.55372126018019	8.23197792893463	8.22788878697778	8.20608342782408	8.47314986659942
TraesCS1A01G180800.1	7.65284540399189	7.47064747346562	7.67064804470564	7.68071905289748	7.64519158924778	7.49010877401793	7.61836093029978	7.64908611197955	7.74843648250625	7.58710491111481	7.75166313023161	7.67451097717516
TraesCS1A01G181500.1	8.04005626584645	7.9696940493574	7.92183009052535	7.4407025100395	8.21640491148443	8.27086045908405	8.20112294855579	7.30748930785799	8.27413577724113	8.30605244388928	8.28216752471865	7.27502963760413
TraesCS1A01G181900.1	7.70069162406563	7.76577407009631	7.64552196615483	7.57072158367463	7.63811200082734	7.45935668760163	7.72313790679586	7.76460759510407	7.20507642158335	7.41453765502773	7.23927649258215	7.7045176629061
TraesCS1A01G182500.1	7.33753400863572	7.22508757954682	7.28418185318345	6.86518572250525	7.42589395269302	7.3507490609088	7.32521437568387	6.55651218764792	7.15020291903227	7.30234454625508	7.12030328762555	6.5781001790285
TraesCS1A01G182700.1	8.47061586014622	8.44011130486835	8.46349225065174	8.78590467200874	8.95397528721351	8.87171091029756	8.9514414540177	9.00629569966397	8.30394559798418	8.49746271441555	8.69075586707246	8.55485033197145
TraesCS1A01G183800.1	8.32922919764866	8.39518846123453	8.40299378086351	8.9905658627915	8.80026410938462	8.56569167552284	8.61856677336862	8.37854802356255	8.58955681842536	8.65787989189157	8.61986075277976	8.96218493315005
TraesCS1A01G184300.1	8.54618128094137	7.71849432505144	8.64826022167676	7.01615314219472	7.766549496786	7.73543712884188	7.85788929725692	7.22345611993712	7.50384944399017	7.86559109523922	7.62018551814634	6.79746909450711
TraesCS1A01G184500.1	8.50270804223228	8.5085024130094	8.47178609385824	8.29406003099099	8.68320820841549	8.6243715902406	8.62976828301197	8.36775476027665	8.64708388690113	8.59447341333588	8.58784438973152	8.38892732903356
TraesCS1A01G184600.1	8.03238504041969	7.87681079305988	7.96653955399053	7.65438928179602	7.87619644443399	7.92454103556068	7.91858802750002	7.59318669886748	7.78183622795664	7.83934601336671	7.86763517290355	7.27106884014076
TraesCS1A01G184900.1	8.14745687924136	8.07160418008714	8.06364752172865	7.54419656057165	8.18932829482129	8.17688056500598	8.05659658177551	7.69916505722038	8.27667595897379	8.17449804230582	8.09859045545194	7.53945225194305
TraesCS1A01G186200.1	7.92227138668111	7.46858617427204	7.54369844988548	7.11221730988844	8.04667885889861	7.94909407198593	7.67582786771735	6.83029462487487	8.00952776572813	7.74671229933934	7.7029940529482	6.25785316413477
TraesCS1A01G186600.1	8.252363913613	8.21485266198848	8.23038516759195	8.44929783998719	8.47076321946185	8.25822088263538	8.17117380666915	8.48849774342321	8.43537467256776	8.31946023838154	8.35229707134774	8.54731868805407
TraesCS1A01G187000.1	7.55964612036211	6.91900873771433	7.12659976109629	6.47788276360687	7.18780019142096	6.91801991799755	6.32960152705724	7.02646054137747	7.30240529089254	6.99696295207052	6.88591564828462	6.54480586561548
TraesCS1A01G190800.1	8.1964282616437	8.13165817868586	8.16045788783922	8.22883970494221	8.19634936135803	8.22373771054792	8.24368080242804	8.33152126780969	8.31489133035484	8.20323739436937	8.3581255892837	8.34270296104855
TraesCS1A01G190900.1	8.17668047291222	8.12024345530832	8.11812683453585	7.86205118268122	8.14335388429756	8.01750588765877	8.16636754969765	7.94558671902932	8.01177142206826	8.02390410412283	8.04992613832206	7.90186852514333
TraesCS1A01G191700.1	8.57548257115254	8.61100267911929	8.60958768714544	8.74825876720503	8.64127396051611	8.69298056298095	8.67292342728489	8.78932389458186	8.61012923943168	8.66861766613998	8.6993223270154	8.7129873540207
TraesCS1A01G191800.1	9.24070002276214	9.22156455105346	9.26003191525738	9.04861226018034	9.14280735034278	9.06130178279369	9.0929494469117	8.89618940682414	9.25504939725356	9.28025249869672	9.26219063752823	9.14983194583972
TraesCS1A01G191900.1	8.53994592319726	8.47644289714471	8.50396775723688	8.30853801754835	8.51627000653035	8.45031365537335	8.40987767912972	8.32042161183309	8.51102083228503	8.50425277165838	8.51566609600219	8.39067897727783
TraesCS1A01G192300.1	8.15310178882911	7.86091059358585	7.77001682446372	8.00885754790388	8.24104086431849	7.91907304603471	7.90964304114543	8.13067669919496	8.09200615101307	7.98313565802113	8.01881517945265	8.0260380453535
TraesCS1A01G193000.1	6.99287247234221	6.97352056780378	7.03797469679797	7.21763183132012	7.09912563168609	7.04687784381989	6.85636902545269	7.34544015714471	5.96040199462079	6.35714741074972	6.24589610420984	7.24354910074953
TraesCS1A01G193300.1	7.60428694562244	8.90959341258695	7.62752424593903	7.53995835274502	9.11677862832187	8.84692750922364	8.83985624785356	7.50704200464823	8.89411601496976	8.98112254226173	8.88531300965616	8.28568499953967
TraesCS1A01G193500.1	9.01358150446632	9.05748067717659	9.0545459210273	9.15487865119286	8.87736563188284	8.84607147728856	8.95234232354909	8.95694668782339	8.99690337065052	9.0353935591277	9.01971004935057	9.19406825899266
TraesCS1A01G194000.1	8.02459876897648	7.98718201087995	8.04973831501825	8.0992036054171	8.0370612945787	8.07010791681702	8.06366061080955	8.10436987918477	8.22048873773336	8.23131673710132	8.22039066088686	8.28353993636139
TraesCS1A01G194100.1	8.30456239845152	8.3469667487973	8.30558154641256	8.27059057324773	8.3037709760685	8.26118447162894	8.33241934286006	8.33786929957492	8.24545678530205	8.23275573007047	8.23567751420057	8.28480141023164
TraesCS1A01G195200.2	7.2507022011572	7.57577030692036	7.4905282840531	7.18097392161989	7.10336278248966	7.15774177024337	7.15861330088368	6.6784322663215	6.75327781443529	6.85444217759143	6.84994889226831	7.07487788424755
TraesCS1A01G195300.1	8.79868123214782	8.75794198774955	8.75132516796751	8.7327759099424	8.77406384598406	8.7734626722198	8.76058423250366	8.67110533875707	8.72050053091848	8.65709329247916	8.70870122176107	8.54730653541698
TraesCS1A01G196100LC.1	7.41015574362686	7.33282096838087	7.4002735730667	6.60029586795425	7.41890288290578	7.31562866000203	7.31114948909564	6.40383854306718	7.55381989055029	7.42166525851611	7.51216889046785	7.06316494670169
TraesCS1A01G196300.1	8.62793001280672	8.61066688814585	8.63805622593454	8.25765619524299	8.64882510960361	8.51510008285251	8.76249457022665	8.4643586507294	8.82091197261954	8.89422422277353	8.86801294958868	8.1614980986383
TraesCS1A01G197300.1	8.34744798734728	8.35293690480355	8.19173338042839	8.27455609331418	8.19640647895761	8.28115051395879	8.1999872111375	8.46233667298045	8.48197789454401	8.58663931493307	8.48799383808773	8.65573498040168
TraesCS1A01G198400.1	7.86253269224843	7.88064977041856	7.88180705527099	7.90226379191721	7.90893342492492	8.00280494387579	7.91802824911564	7.93025520607114	8.0360745754398	8.15075751000231	8.09953869075788	7.96724931780181
TraesCS1A01G199000.2	7.18080714080808	7.0792850124263	6.75201632543546	8.26031328324669	7.53154264592767	7.87081185133779	7.56468639045109	7.35227674645137	7.42586987616956	7.78556377955553	7.35148219319737	7.64722658014102
TraesCS1A01G200000.2	7.79637031956906	7.71849079114372	7.8814589935299	7.5572019300596	7.73563643933786	7.79649377025293	7.78675861854389	7.79198425990574	8.08982460858428	7.9233090168993	8.09363925993975	7.63705880304065
TraesCS1A01G201600.2	7.96737929937562	7.79792440295009	7.99400268630268	7.98397175530686	7.79751804384914	8.0122189670136	7.85089122427302	7.86245403044657	8.02000954336962	8.0751174354574	8.00640463507711	7.83150104414272
TraesCS1A01G203400.1	7.17571654815321	7.00999707267427	7.08548531695786	7.02593782345677	7.12441952721159	7.16984450883966	7.29581121755341	7.19153067254995	7.26071541893337	7.09871430572873	6.95655559641272	7.08447486439308
TraesCS1A01G203600.1	9.4227754252041	9.28478501243861	9.31207703293187	9.09305160228189	9.32556302701291	9.06732795461744	8.99049567236218	9.12640326984822	9.47764809828913	9.45647854075314	9.45869601776948	9.23779118844189
TraesCS1A01G203700.1	9.82265022749662	9.74316395556911	9.77024374374122	9.64147371951446	9.64938877668414	9.47992344232537	9.44379119967012	9.55286838991882	9.78430280866441	9.83607312891296	9.81984858240759	9.65199984648519
TraesCS1A01G204700.1	7.9000142356615	7.85457979272606	7.89748330865687	7.58037036761173	6.68480031866043	7.95047992191649	7.98455119236938	7.31612788104722	7.21541268159767	7.30411796462793	7.172868786952	7.23244192596125
TraesCS1A01G205600LC.1	9.22760040458808	9.2277055384914	9.21869112213316	9.08689492438452	9.18590433847352	9.19513044000586	9.23810375706537	9.12055236038135	9.27689823874808	9.2382091677814	9.32568120305544	9.33688815302795
TraesCS1A01G206900.1	7.76460102159664	7.81601197749138	7.68810156587613	7.49692297036108	7.70377872107797	7.62797407575296	7.70712706239599	7.46548765730559	7.7320743736891	7.53341800651347	7.55377395514587	7.37459048271128
TraesCS1A01G210200.1	8.64388562715907	8.63617785466034	8.63822095519684	8.69175524971352	8.63322124598355	8.56392643644476	8.63175936636592	8.41276207815867	8.60861302896249	8.58791066375771	8.62295435333906	8.49268991548524
TraesCS1A01G210600.1	7.88167556890944	7.59899374634314	7.68826157802399	7.30035492395291	7.68794115007598	7.61813665233521	7.45806897431484	7.5129938035745	7.7405301923135	7.84076045041917	7.87705647919375	7.16780882100405
TraesCS1A01G212400.1	8.93200009714347	9.02274528593108	8.96708054887728	8.76322206201314	8.81221129188091	8.86205978809721	8.91670652154269	8.738392184768	8.81439713710001	8.78663139616692	8.86738025912486	8.66570886358732
TraesCS1A01G212600.1	8.90822233337298	8.93088605975685	8.87866618044771	8.66567174931713	8.73950241308772	8.83624119906075	8.82107938967974	8.75330669324774	8.83072901646237	8.78080329285608	8.82882853706209	8.80872495080081
TraesCS1A01G212800.1	8.36085226655143	7.9472963212851	8.20130234881036	7.67813469192333	7.77017170665769	8.23540927209245	8.24621454006496	7.88802160607355	8.36953840597555	8.28428709662365	8.27914470013759	7.79025472728297
TraesCS1A01G213000.1	8.92715030970167	8.90815895696817	8.87231881775529	8.90016053333015	8.93625882579583	8.93684303263534	8.95306942318594	8.89133873264669	8.90348031883724	8.89482800819976	8.89622067003622	8.84749468768377
TraesCS1A01G213100.1	6.86119144698286	6.87172511080124	6.79051206870971	7.42794388317005	6.83665337449158	7.02462978488947	7.04456279476581	6.62271070102053	7.07015369267853	7.01034529468822	7.03842478080692	6.77055361413185
TraesCS1A01G213600.1	6.90515249563122	7.40708209166391	6.86675626227038	7.56554161259089	7.04699989574524	7.11837648219516	6.92145328376219	7.35200339871759	7.06067942912644	7.14890039016791	6.95505459728817	7.30130245861181
TraesCS1A01G213900.2	8.1876219949352	8.12933815627403	8.13343407095934	8.14900155317632	8.14185267119579	8.19484357934805	8.17653736832911	8.30719515917252	8.10825716093768	8.20760137063836	8.2254422573123	8.17219369069735
TraesCS1A01G214600.1	7.2050792882793	7.1163468028015	7.12510076178563	6.90356315513408	6.98462895781786	7.56007760338511	7.22635246335782	6.52129947340311	7.91143617256527	7.91650238036735	7.9206620021378	6.52129947340311
TraesCS1A01G215600.1	8.18998274520712	7.94168044706692	8.20388575160222	8.42315508720382	8.1302729479968	8.17253087315834	8.20154532118466	8.33548946022299	8.27915311386277	8.20865262064157	8.2998976178073	8.36478338859178
TraesCS1A01G215900.1	8.6136771718067	8.39858933793256	8.46613978785609	8.48571364936239	8.55704931577549	8.48168370772719	8.50172303170558	8.696256125696	8.54843450134772	8.54979646310198	8.5783432615542	8.64936040673653
TraesCS1A01G217200.1	9.68239798849563	9.60739671722931	9.68289683306641	9.78044874148132	9.78056159826143	9.75005527590762	9.73089686858992	9.81512864236888	9.60469782276292	9.68969031752028	9.7246721189527	9.77815276575097
TraesCS1A01G217300.1	8.85443829220043	8.93442267540755	8.87469468313562	9.0644312473379	8.72315975639126	8.7544150463621	8.72386375692909	8.98762339696557	8.8551581411863	8.8699791536034	8.88654173813676	9.07978173794721
TraesCS1A01G217700.1	8.92983523842072	8.63929250972742	8.70089540010298	8.75601321943387	8.83369702052009	8.47104712516111	8.42632007786158	8.24342977272269	8.62131518516773	8.24857308737613	8.35586220837176	8.09019624780754
TraesCS1A01G218700.1	9.57296054382492	9.4899869188343	9.51118370764643	9.46508541815786	9.56628446715624	9.51099097842362	9.51925999744198	9.540120611402	9.57885695185048	9.51683939473305	9.5419936807635	9.58207179564975
TraesCS1A01G219900.1	8.55306531271342	8.46534978369096	8.54331654402801	8.45334920601552	8.62364942402359	8.58902391476549	8.55432238512735	8.48027720460582	8.59759351505204	8.60066790897439	8.54756803966294	8.36303288460768
TraesCS1A01G220200.2	8.09685113524555	8.03561244599589	8.04545548263123	8.01175612852484	7.89254969382464	8.12937137244191	8.16478053620447	8.03034287755289	8.0580123622731	8.18867795904088	8.14565234211098	7.95522281804342
TraesCS1A01G221100.3	7.61812993056451	7.6424033576002	7.70820086161032	7.82609209433514	7.7082111528355	7.6432663645285	7.65315671918803	7.93544423340463	7.24140470497112	7.60897360369703	7.62466536022423	7.8061374042073
TraesCS1A01G221800.1	7.77304475460638	7.87695582950162	7.87982219840156	7.94959156912329	7.83900423348286	7.90311089469088	7.92122322031663	7.87440944221753	7.83170242905906	7.89288668819008	7.81028613915798	7.89862499378632
TraesCS1A01G222000.1	7.06580086237874	7.12149992035479	7.0551127701087	5.85830534270826	6.98469585612436	7.19775607065116	7.20751871579474	5.69199008780254	6.85495985206224	7.05886254508351	6.99715747479746	6.31093412763457
TraesCS1A01G222500.1	7.53480278618645	7.18001411632597	7.4077354025895	7.00847886108924	7.55233574581202	7.44467371443215	7.58878764034291	6.13083442375428	7.28493758617958	7.34693930417631	7.33721629266642	7.4627741801991
TraesCS1A01G222800.2	8.79876715924525	8.66589410046475	8.77946943095146	8.69108543728709	8.84186521505914	8.92809727531652	8.87841370230217	8.735842809858	8.88584807014148	8.88915888004693	8.85436408132803	8.67354696454668
TraesCS1A01G223300.2	7.68365797459337	7.8128929644212	7.72045265176013	7.07475107143264	7.74947115562923	7.8541227511037	7.80985420506217	5.69003062374986	7.97324248289317	7.83020163173253	7.76774175386617	7.10572496331947
TraesCS1A01G223800.1	8.71917704407188	8.81614239353503	8.73677859294416	8.73250811757046	8.7366781556672	8.79448552584794	8.73606786880093	8.68639922662543	8.69515775113277	8.72949547315918	8.70941728247304	8.57606804439843
TraesCS1A01G224000.1	9.58141518374487	9.50415696390757	9.54742812159419	9.56491375232832	9.53341659765635	9.50535967988175	9.54312419857764	9.62925701397486	9.50444021216395	9.4739711537978	9.51876587162047	9.58578282560944
TraesCS1A01G224800.1	8.12070701487787	8.11787011812671	8.11074824767369	8.16839692859949	8.22830332837303	8.48161050203457	8.16051842065355	8.36391322238427	8.38383576373259	8.58774061291656	8.54168833645541	8.44817023279235
TraesCS1A01G225000.1	7.44380635743062	7.19055177647302	7.35788869757446	6.99974898677866	7.47683152988575	7.63768941421303	7.64231302473958	6.58125342779238	7.41052632949244	7.30949037706683	7.77367904556737	6.96517351199017
TraesCS1A01G227000.1	7.63332828666578	7.56549843013231	7.75200713579397	7.50062899837616	7.6983222627501	7.7805094074224	7.77180940725902	7.67480168464714	7.72126400836387	7.70265951384485	7.74886569792915	7.5119397143114
TraesCS1A01G227300.1	7.72022062217262	7.88593631648982	7.83473350562215	7.71457736517276	7.86361282647135	7.96416672903303	7.91376992258184	7.77100839335684	7.85497730562255	7.75538729252507	7.75455872970888	7.63237864877906
TraesCS1A01G229100.1	10.1946870946	10.2064499062676	10.1922499992995	10.2730949191966	10.2889421783695	10.2786661670934	10.2312026466114	10.4030935753923	10.2731000194284	10.3610997491428	10.2020050039112	10.4127589612707
TraesCS1A01G230400.1	9.6077116243159	9.48862642533453	9.49490449373172	9.51741066092068	9.60614393890585	9.53977008821587	9.47819829205416	9.62350834143128	9.58670685942407	9.48851051231557	9.61588504732818	9.49620475266541
TraesCS1A01G231000.1	8.49082961847262	8.18451138013515	8.40461724316956	8.51138644563452	8.29452179799852	8.36332789965682	8.41528620744885	8.55195341417221	8.29926163993954	8.25607439438608	8.2336053986752	8.41329759439512
TraesCS1A01G231100.1	8.62379567048191	8.54235894628219	8.56008575875089	8.33111847550611	8.61228776896955	8.62577558559841	8.65307322108204	8.41302631511406	8.63113850123717	8.60979570022347	8.59532928118296	8.34845964221646
TraesCS1A01G233200.1	7.62657248636508	7.23229215036274	7.43515419350079	6.82396686647948	7.6304327596105	7.5224895317295	7.72351526085807	6.60906434230224	7.486112777473	7.58099717696783	7.57734176321295	6.36611740799326
TraesCS1A01G233400.1	8.13802547498146	8.26462409705255	8.1595279882023	7.77432064516499	8.4059704373797	8.06774936713703	8.4929705586007	8.00477059400413	8.2293950073518	8.19101303786698	8.1960235166469	7.74698522090686
TraesCS1A01G233600.1	8.49265155640317	8.52355330825562	8.50861083365407	7.60144086047791	8.47667420228329	8.50394686500183	8.55278206420586	7.99136346585107	8.50290683305732	8.49520821287664	8.55499410891685	7.83588848265813
TraesCS1A01G233700.1	7.24800740526097	7.30786998709383	7.17569345277455	7.20657602241801	7.2186492179985	7.32864478097527	7.38004315751764	7.40057832754699	7.56557016037853	7.6608473655653	7.62386815443064	7.52832197409136
TraesCS1A01G234600.1	8.3619350938102	8.36323022747583	8.34519870766447	8.35655516569746	8.38786244556612	8.29496299592797	8.32142242538838	8.44155568688128	8.41313319540691	8.33906288329682	8.2975892811855	8.68476918311355
TraesCS1A01G235200.1	8.205891342226	8.1120397356114	8.17077620978481	8.07805781241608	8.28414426794619	8.20586146156571	8.16585308604946	8.20876398125382	8.19715156779107	8.19400934172402	8.1820860469302	8.16696133560427
TraesCS1A01G236100.4	7.62158505451098	7.65402358128044	7.69016593030489	7.32272832543783	7.56545764890658	7.61355531024455	7.65887176756728	5.72563482181743	7.39789544540969	7.45458457509867	7.4310657173228	5.72563482181743
TraesCS1A01G237100.2	9.00938937808573	8.97276174634329	8.96943031961059	8.75067240617876	8.99128313693891	8.96253842736411	8.98447917731818	8.94424170915475	8.92572632237841	8.93259114906142	8.96619452837721	8.7244800727996
TraesCS1A01G237900.1	8.63484118943447	8.40113213604027	8.48306392099282	7.55304169341797	8.66085669592096	8.55518564553705	8.56699307527549	7.30814661975074	8.67062017731925	8.6042186769149	8.6866279571399	8.48501639814272
TraesCS1A01G238900.1	8.85376788041011	8.76011461061317	8.81785015503825	8.70919961893067	8.79668073943226	8.80976765681071	8.80048023075878	8.71412418192372	8.87911685776346	8.89116579031951	8.84171248594416	8.77143136166033
TraesCS1A01G239600.1	8.51938089405716	8.45461569155707	8.44970842192103	8.30211003199123	8.46615114927867	8.46180735546979	8.56779127733594	8.33687633829303	8.71024889828993	8.69473175513693	8.61566609437818	8.5501597116682
TraesCS1A01G239700.2	7.90633282953301	7.89370699564376	7.84062023974914	7.4886280559778	7.81929191979415	7.88833351952189	7.88239816000686	7.60794328981596	7.81093082961368	7.81927950424945	7.82246260658608	7.54222905649715
TraesCS1A01G239800.1	8.44963784108601	8.42410403004518	8.24105031574697	8.36754512675829	8.31405913734634	8.393506499594	8.45429434874254	8.36433920339058	8.50739491241643	8.53166350555943	8.54339256311013	7.59849921472079
TraesCS1A01G241000.1	8.2431245052843	8.18594212793941	8.251825819441	8.01587488995983	8.1654948173189	8.15309722861125	8.18381865402762	7.90667192841489	8.24500198876154	8.20722381799232	8.2167258254409	8.15501144771232
TraesCS1A01G241900.1	8.56903357986363	8.61907106869305	8.59962215826749	8.69891440024755	8.40235934688553	8.38881892668298	8.55246043531683	8.7522890214005	8.62008722922501	8.56389580718469	8.67640908393866	8.83837679231063
TraesCS1A01G242600.1	8.70766715977511	8.59230616701813	8.6573300821998	8.51030106360626	8.68011651326767	8.62530485225752	8.67366102857041	8.5944262102532	8.64053404936495	8.59192487777173	8.55079552762472	8.68643029905266
TraesCS1A01G244700.1	8.83172084851611	8.69831299519489	8.78675842994187	8.57670404810604	8.7245842359072	8.7048059824879	8.70087208941229	8.58584589406743	8.68337341756014	8.67477856399905	8.71446215303672	8.52031806710214
TraesCS1A01G245000.3	5.6875193640031	5.6875193640031	5.6875193640031	7.07636418602595	6.02586634219077	6.54519049706134	5.6875193640031	7.39461302919949	7.00003055675938	6.46549414794042	6.46502000560251	7.1294536059644
TraesCS1A01G246400.1	7.46136238453983	6.91611264527268	7.07519338692568	6.00279259906432	7.66067459120046	7.48388056079573	7.4059629989261	7.59787435612502	7.57367524903053	7.27611907714109	7.41097051513145	7.27184266288903
TraesCS1A01G246600.1	9.54902800105019	9.50645945744393	9.44780649627017	9.45626524647345	9.50021348596343	9.48186714868453	9.51560965433011	9.52573767072062	9.62475978673792	9.53882545768912	9.56394903921997	9.52834687486562
TraesCS1A01G246900.1	9.21726783788396	9.16680021433331	9.20388240893729	9.25401615842912	9.23939908283643	9.24769156818294	9.24004017604332	9.30486432084616	9.18426309479326	9.21858732565457	9.23864885000987	9.18954140674295
TraesCS1A01G247800.1	7.66757964731954	7.89546823998876	7.66002430886045	8.07233881812378	8.20994366475009	7.79400227214547	7.76985111459467	8.30903550859363	7.69326688024786	7.63024814251843	7.57519105935799	7.90981495361706
TraesCS1A01G247900.1	9.0757973206601	9.11766787012747	9.14544788901082	9.05567824351466	8.95090793687445	8.97692238743324	9.00627439575717	9.06090232136846	9.12937844085939	9.24137986064503	9.17230346027694	9.23832442739612
TraesCS1A01G248400.1	8.31599880853786	8.21548525279995	8.18149404889893	7.90194171509313	8.19579699188342	8.31238822295104	8.31115994485486	8.16918276212793	8.15072662625089	8.18550151160538	8.22843133350376	8.17084960003653
TraesCS1A01G249600.1	9.11927193354417	9.10470067720343	9.09786760897184	9.01689777413116	9.09570771304344	9.10825711150119	9.02275991690134	9.08556491993962	9.11659677541441	9.16373511490965	9.17988308950489	9.13910140435465
TraesCS1A01G250000.1	7.20784081290768	7.70903959310445	7.17857743729919	7.25962806755536	8.02645137959871	7.01284342915305	7.55961016734533	7.47496689776254	7.41417012896081	7.73970970739139	7.79746478780333	7.71569006725405
TraesCS1A01G250300.1	8.42744997108141	8.38834039184995	8.35701734029423	7.93928806834669	8.4835773754078	8.60344056066702	8.49618803753392	7.25332903842835	8.59607099987274	8.62832037068953	8.57515425143018	7.38528649146692
TraesCS1A01G251000.1	7.91886255786809	7.88773369296118	7.92559766232737	7.46648862281716	7.76915832519534	7.77828414813772	7.83879114133911	7.70778687469426	7.69592283718629	7.7890917584761	7.84886664926066	7.43445549490467
TraesCS1A01G251200.1	8.75804798104131	8.76226353468275	8.7565923463644	8.66549429722647	8.54575033961108	8.60226512193529	8.62238722602169	8.54059714390644	8.80657733403252	8.931672529696	8.79849698607396	8.88575049260174
TraesCS1A01G251900.1	7.63180323307257	7.18444324817982	7.18766594542897	7.84360858247868	8.07415774207479	7.6419303834462	7.39846117467515	7.65387440108405	7.8788298353847	7.60752233285627	7.39320998288353	7.5672412099332
TraesCS1A01G252400.1	7.0737312508691	7.15127267476218	7.22382388839455	7.60755657381615	7.00770000851984	7.17053515700338	7.21885336544811	7.31971351340463	7.37334471635228	7.16754291051429	7.2534123742559	7.08520927685136
TraesCS1A01G253200.1	9.47265214995018	9.42783178584142	9.5331632086138	9.48276587882495	9.7580240991444	9.38932286510955	9.43303806282617	9.27494450534921	9.52434153131047	9.61535816472942	9.52775077611375	9.29598871829091
TraesCS1A01G256500.1	8.62646236409593	8.60624299799617	8.6150360950769	8.71980545237849	8.4806396996883	8.64245886085252	8.18382835445749	8.8760141382977	8.32079380727666	8.28717849774841	8.12472586139015	8.88923101272306
TraesCS1A01G257000.1	7.97656948974001	7.99014711686155	8.03894663073135	8.47613018232651	8.01519132655216	8.20212790970661	8.19261782638645	8.41890544793448	8.26398640389059	8.31473524148465	8.24315937769074	8.72488479974651
TraesCS1A01G258800.1	10.2308492832631	10.2781323332635	10.2707725548245	10.1770776013475	10.1127717653881	10.1700137245768	10.2386017400345	10.1929292079051	10.1489389120961	10.1521868806047	10.2052722926864	9.98856937630104
TraesCS1A01G259700.2	7.33737150608911	7.35528846698855	7.28127039195041	7.60985708176601	6.98693923289992	7.10610946588863	7.2231044681668	7.52974819334019	7.39890534668255	7.56472488731973	7.48828325433955	7.88068281719526
TraesCS1A01G259800.1	8.312620870008	8.43166133256658	8.37294249607003	8.30237473308358	8.46153257702769	8.33207874942735	8.39039076279522	8.37907493600712	8.37550964985584	8.37406898438	8.36733438222036	8.13721812326723
TraesCS1A01G260200.2	7.51622072425251	7.35842723422053	7.40895832174421	7.51381676670923	7.16365978464447	7.5386770030055	7.50414889923836	7.47611457215564	7.68900889341671	7.54140470292607	7.6856521296731	7.50140393233182
TraesCS1A01G262400.1	9.11677172965115	9.1706250542224	9.11846810985185	9.22144217010055	9.09255816883978	9.18391268963877	9.10337780820987	9.08364873053408	9.06705698458175	9.16953691303409	9.1578568331354	9.08651269258916
TraesCS1A01G262500.1	9.14055066528673	9.18821596733767	9.13644154664063	9.24405049304504	9.10771301634844	9.19269239726924	9.12573206359172	9.11448121331265	9.08968726299966	9.19337696706139	9.17239388804208	9.12262646674376
TraesCS1A01G263300.1	8.77209400106387	8.66937512882628	8.63422342338481	8.74169833834647	8.71625241549643	8.61770588744348	8.63478864729161	8.92714446434971	8.78992771033104	8.8647173643205	8.81426065294537	9.00183816327975
TraesCS1A01G264000.2	9.3220732935698	9.23930709681107	9.36950385121733	8.86524745096258	8.93696975010536	8.96438058838909	8.92113561636315	9.01629795995001	8.92372110743501	8.97936535063848	8.941140814267	8.92163585110994
TraesCS1A01G265600.1	8.18242725290887	7.80298066395986	7.73810294390767	7.50751201566728	8.51048915275641	8.12772962701234	8.06052713279028	7.57877942916487	8.34523649118506	8.02850062046391	8.21835259163187	7.50510985826163
TraesCS1A01G265800.1	7.67312354123306	7.31121098122103	7.33428227536463	7.39241280453725	7.71710255970078	7.47762731624773	7.49208848679569	7.45685588176917	7.81640277728701	7.66580344991175	7.8331942954489	7.52684030364078
TraesCS1A01G266000.1	8.69930256104907	8.49897502147057	8.58821886175907	8.63611758640117	8.45041776644472	8.46019277925392	8.37037038171527	8.44196252827529	8.745967112726	8.53479846718881	8.64886861507257	8.63719317923735
TraesCS1A01G268500.1	8.39627356168824	8.44697304330561	8.46324787765734	8.08119921085211	8.6287068083343	8.48095134346501	8.56321699432103	8.26499132878466	8.48697293073456	8.42340027489089	8.43853949090335	8.20427511753769
TraesCS1A01G269300.1	8.47224760317703	8.25813746476266	8.37316458766578	8.50836484720464	8.36307829447726	8.38524524846117	8.47834287097461	8.52794024877296	8.51540715277366	8.23473351342012	8.5255340351602	8.71881842566826
TraesCS1A01G270100.1	7.13530575414339	7.11433955686075	7.0965899401615	7.28473641199938	7.21378649711918	7.43651502489034	7.18588367541837	7.34153737749063	6.9063515740239	7.21386950592408	6.86607999422504	7.74557367776894
TraesCS1A01G270300.1	8.9233454506062	8.81018954812991	8.84874000894252	8.82905944507041	8.988805180116	8.9326959583267	8.92414834933613	8.84704155182123	8.93945719697081	8.81161377160777	8.92713712046493	8.78000545840978
TraesCS1A01G273500.1	8.75049391074514	8.90008897583026	8.79878084650912	9.20435415535405	9.12429760188683	9.17017697223321	8.7607835071754	9.38405190834389	8.71437455267428	8.86477604348883	8.7320277413643	9.12758994515294
TraesCS1A01G273900.1	8.9653830318202	9.02605262961348	8.9870700611331	8.96074923870866	8.89062177887172	8.86379145477284	8.95753591166802	8.77926326951264	9.03715338271824	9.00597619321014	9.04827599362586	9.04178014539425
TraesCS1A01G274400.1	10.1525996227081	10.0711585840426	10.1579865091247	10.1013577268015	10.142749671088	10.021581899451	10.0827981893777	10.2062633994756	10.019436786306	9.97200354920075	10.0141401107326	10.1658725280783
TraesCS1A01G276500.1	7.76009011778699	7.73674816430464	7.80781155623242	8.05946713985213	7.77944138350157	7.67376375038035	7.87126799006188	7.84402821562814	7.6081650351128	7.61781791748398	7.66703881933347	7.73921554343348
TraesCS1A01G277500.1	8.50276304193661	8.49133143165762	8.4322267882798	8.64709531930415	8.36788728246009	8.60765122569098	8.58575954372149	8.74477592048277	8.57579358108707	8.58450547363128	8.64827296900736	8.7587000292953
TraesCS1A01G277600.1	7.73906268815797	7.54269482600456	7.64278161594849	7.62450322410951	7.68340949888446	7.7565436380931	7.69479148625409	6.08646556774313	7.72230922864238	7.78050600992027	7.74830935066427	7.87353076977568
TraesCS1A01G278300.1	7.35242013909516	7.31795692247919	7.26811885573898	7.40470599121142	7.27243980457421	7.27075027204567	7.30682223128078	7.43850688642514	7.22292653483542	7.15098957517885	7.13894833571895	7.46790544377873
TraesCS1A01G278800.1	8.11483901842596	7.59347211951848	7.77794955624699	7.65175291093909	7.99252074415589	7.88007756129803	7.65787310328041	7.78023486668359	8.12988062160201	8.03042195494086	7.9061176030387	7.39366260407964
TraesCS1A01G279000.4	8.96172654749925	8.91361010113365	8.95773892724227	9.06429986794602	8.86540971586913	8.85738398082727	8.95371915962704	9.06116117998063	8.84703579898855	8.91708215376688	8.87452505114609	9.01271609986891
TraesCS1A01G280700.1	8.88901065654226	8.7752580727319	8.81900296470754	8.85865139059521	9.00578505442215	9.01811847746399	8.98810574428902	8.73937455135956	8.99951276174672	9.02487934491283	9.052596109577	8.72018955234261
TraesCS1A01G281400.1	9.00369716227204	8.74921867843597	8.89948570371247	8.9569412689502	8.96560596222378	8.92079947471723	8.97803222804313	9.04576485949189	8.92957061806856	8.98049432410009	8.84094247393378	8.94568885808142
TraesCS1A01G281700.1	8.70373261431499	8.7653457400516	8.75528128313968	8.96476913295903	8.63952254638076	8.58562329636798	8.61930627684958	9.01831823859545	8.75726486320626	8.83200250738188	8.73232006900817	9.23568494731627
TraesCS1A01G282000.1	8.76760810747318	8.76635767464512	8.81150531912478	8.78581297697552	8.77776037718046	8.72408427006357	8.70063974118373	9.1131962224642	8.79574482916087	8.8005827966904	8.80029302872693	8.87489397451623
TraesCS1A01G282600.1	9.13468355568589	9.01192608323347	9.05136851898749	9.09878421853143	9.11866839032395	9.07620748673601	9.02590037421662	9.19491593962213	9.05748221030173	9.06670064461845	9.05225599986398	9.14722420066028
TraesCS1A01G284900.1	8.50879087548647	8.3258469573678	8.3861275793086	8.34439097408108	8.74186695531035	8.58948806976368	8.60228050848834	8.43435391570351	8.67441398505616	8.54856733848186	8.58681485266151	8.21555601449605
TraesCS1A01G286200.1	9.02484830530948	8.87402795723154	8.95137508355375	8.9956441893352	9.0134999908811	9.07405560650522	9.04126998254482	9.0717660877185	8.94247191258733	8.93419682115161	9.04094590546854	8.93835620617762
TraesCS1A01G286300.1	9.48512349883412	9.46892150384662	9.45686090116231	9.51544097428126	9.51133702795519	9.4506110469984	9.49934467838514	9.69476863615568	9.45832044688462	9.43062594441306	9.44573714477459	9.45422360515668
TraesCS1A01G286900.1	10.0326552294232	9.8478531478135	9.79982100980408	10.1567375239718	10.2194796629751	8.44908721472081	8.37149990916545	10.3107818893292	10.2121499973985	8.44660891026652	8.45326313918114	10.3099109267041
TraesCS1A01G288800.1	8.89711437411718	8.67391565087092	8.76991112603734	9.17340460741576	9.16806978348908	9.12775097771135	9.13451510601474	9.22855562641854	9.13090055752126	9.14056132282709	9.13234492919247	9.1625324430388
TraesCS1A01G290500.2	7.69325739314165	7.65350580441418	7.69324485941303	7.69056868374737	7.6221381033638	7.56675498677282	7.58829530319678	7.68971006152775	7.45692425518442	7.67640010137111	7.50399889131396	7.55574492941315
TraesCS1A01G295600.1	9.44505283285102	9.34271723869069	9.41212644459779	9.43933155474635	9.33436277034041	9.36144977620239	9.37315591470802	9.54391556973041	9.37904874507153	9.35930988989934	9.41897130578237	9.49310821861675
TraesCS1A01G296200.1	8.74561013937109	8.63286928704659	8.72340427402098	8.51178513223643	8.66985189749608	8.61751684110712	8.66353317042605	8.6747619876711	8.67840374339148	8.67442760913097	8.6673407568504	8.67587891576649
TraesCS1A01G297900.1	8.00005379192569	7.79095880004977	7.85252282948009	8.49116159148069	7.90011218716174	7.91762291488563	7.84175866954444	8.58169766437623	7.90612487492551	7.97072685600172	7.9779009143691	8.56393456616734
TraesCS1A01G298800.1	6.56098320670517	6.06902930862727	6.54671154486244	7.67288284265681	6.72642644649864	6.63930245518896	6.58032165112587	7.75672324535985	7.01685080260535	6.62536076689959	7.2276807090164	7.45031956235445
TraesCS1A01G299100.1	8.59207628578004	8.66414720905245	8.45352170139298	8.82691759608767	8.76994987712465	8.73522637415848	8.78978062435466	8.76704891317535	8.89727376255481	8.89456071370978	8.90337070103306	8.99296047644173
TraesCS1A01G299500.2	9.10804337900619	9.05322531008588	9.0957902070661	9.12475715702248	9.05888505482026	9.07114101399994	9.11281203636774	9.16848980965387	9.05268971280748	9.07192037624067	9.10568667399996	9.09331448457888
TraesCS1A01G299700.1	7.73024743024737	7.57299691062587	7.73332947081936	7.77859217335016	7.6980018192692	7.77780443148168	7.83812227284999	7.61507216118843	7.97813381273526	7.74233118743455	7.93628216810488	8.01855738209126
TraesCS1A01G300200.1	8.64103941912536	8.57952711489935	8.61202979307125	8.63037939733259	8.69565819738336	8.63731138254358	8.59830153418804	8.80784328725731	8.70493709983124	8.63304726475123	8.74573477452344	8.7958101937302
TraesCS1A01G301400.1	8.60024805693118	7.86908541696738	8.51473409652506	8.42758846525011	8.09794916409168	8.05151617461778	7.88802808504711	8.25117565383812	7.83383208265834	8.01497018802298	7.90109168002359	8.42906544801922
TraesCS1A01G301600.1	8.80256271831621	8.74667120813295	8.78639519994457	8.87088335959774	8.70079127119353	8.87781868635206	8.79914965265177	8.86537633161143	8.83624983522398	8.84365456827892	8.86846411565227	8.87748739443251
TraesCS1A01G302200.2	8.59755715148592	8.57353183351957	8.55063725622469	8.61181559689891	8.62097382509203	8.53753048774157	8.53454105047022	8.70273938638995	8.63654940463519	8.57946935282512	8.60932934940229	8.64808178351329
TraesCS1A01G302300.1	8.84930273493359	8.81292439315884	8.76808091905998	8.75128852902584	8.74586407080318	8.61702015970701	8.74512613379674	8.70934245146849	8.64682349548588	8.66972461083327	8.69182178959554	8.65176765378407
TraesCS1A01G304100.1	8.42784205684292	8.62074491317624	8.49635530815262	8.52391810755672	8.62017658164048	8.72315268700135	8.66709173487561	8.69491288856509	8.34575366862041	8.42206798532867	8.34102141217669	8.65938864338538
TraesCS1A01G305700.1	8.45308813443301	8.3904775830271	8.43234122623554	8.42226063027486	8.44756349162919	8.42132676538995	8.445913433942	8.43350190836909	8.44949027374227	8.43302144337944	8.46997521575742	8.34096612746818
TraesCS1A01G306400.1	9.65110715807104	9.45455975647452	9.50909288420072	9.88378486780886	9.90140908835936	9.92834006577205	9.90992996781804	10.009545902074	9.90408772310902	9.98131545683166	9.90550073950276	9.98589669393089
TraesCS1A01G307400.1	8.8998480758998	8.86530380051275	8.88945789752564	9.09212419807327	8.86254417032704	8.85441129434007	8.79340718317555	9.16258216736929	8.95226529657008	8.89400115592551	8.93981604307949	9.187690404234
TraesCS1A01G307700.1	8.25950409950386	8.13651785162761	8.20525214160435	8.21465708373198	8.24639987495859	8.26455129055459	8.2916631365123	8.15501951378553	8.30154839502683	8.23817665523593	8.29313761539424	8.21205294212629
TraesCS1A01G309700.1	10.2372524353639	10.2845911901059	10.2768351512387	10.1852213587647	10.1186380183836	10.1772016935836	10.2462559353935	10.2055105483627	10.1572335664169	10.159565199374	10.2138642443208	10.0063676279096
TraesCS1A01G310500.1	8.5156549676891	8.39713203121527	8.3899527714964	8.61505238034342	8.60013611713377	8.45701581631321	8.45479773298959	8.33268765711538	8.47487763234228	8.44720454854913	8.44985817696029	8.63039905288238
TraesCS1A01G313900.1	8.12376129174826	8.25736662648599	8.18027247622963	8.00236336852428	8.16175204166129	8.25022101229018	8.18449203708131	8.05944652091141	8.0281142764163	7.95147218613795	8.11136872385493	7.89628578126369
TraesCS1A01G314100.1	6.65297346305166	5.86456126896464	6.78199368380689	7.2022005605633	6.75115674532415	7.33116920680991	7.3724433597097	7.49336506126995	7.20671187723203	7.24907688446305	7.21306594467273	7.55139424365943
TraesCS1A01G316900.1	7.05872796630475	7.17189388442458	6.94340464973978	7.2137318569535	6.88591976830888	7.07412001640939	6.96163901829687	7.40872576186312	7.15245603510524	7.19355257524873	7.05825214079203	7.39849358386702
TraesCS1A01G317900.1	7.94479170425919	7.92866236020016	7.88874359933843	8.30035738544914	7.90264075704915	7.93684043621509	7.90162905670366	8.13359695043769	7.85849992336535	7.77348443706535	7.89659531776555	7.984900186336
TraesCS1A01G318900.1	8.05715335444035	7.98711541466897	8.00988863598705	7.95666235338113	8.06073375487942	8.06156161598353	8.01754693157078	8.12637221680686	8.03297180291917	7.84805361345418	8.07861346039104	8.01972231311103
TraesCS1A01G319300.1	8.32272770292862	8.30760371022048	8.35826954273112	7.99558798967612	8.22622571980963	8.18431694593526	8.22086168015056	7.91540434854376	8.17568273612869	8.21049322103441	8.22280247800987	7.81999193196823
TraesCS1A01G319400.1	7.71456533755568	7.59294199693769	7.69953401082934	6.88591524871477	7.6575707526429	7.69166371635882	7.73029157966392	7.69053258662217	7.85272176813475	7.76353101254765	7.80256797280544	7.68086356780656
TraesCS1A01G321000.1	8.90552254518919	8.75255919060943	8.84780431088003	8.72245920181778	8.78710957536346	8.99051322677338	8.94034573301224	9.06847442103274	8.61207387938677	8.75219095033342	8.9498402429156	8.88729193864747
TraesCS1A01G322300.1	8.83899268306457	8.75125525834496	8.81492363697786	8.62074708939212	8.81759132684535	8.75514750655382	8.81051279338195	8.69288049844918	8.86204709667569	8.86942514441576	8.83753391952685	8.71392544642435
TraesCS1A01G323400.1	9.18928078587543	9.06622725574016	9.1141468524417	8.97807693699847	9.14006477503247	8.98344048857759	8.91782582135936	8.84801965122771	9.15187316151043	9.37171166931648	9.03128729370087	8.92438046550938
TraesCS1A01G325600.1	8.65094765808274	8.57535753888479	8.56979881148535	8.58210534249276	8.61037835198382	8.72903328790878	8.66678949085401	8.56513988889585	8.75890879984247	8.87716062969649	8.79172027703862	8.62053539852728
TraesCS1A01G330900.1	7.78084111767838	7.67029808085237	7.65788495508702	7.90478320656083	7.69552785155127	7.71064271098737	7.77820673704312	7.77854780138334	7.74746492059013	7.75872619032758	7.74922135745558	7.80083309044248
TraesCS1A01G331300.1	6.31299320304346	7.04550787929474	7.07988332919564	6.2291602515997	7.16305475342192	7.34216910050935	7.19037527261004	6.2291602515997	7.2504243924214	6.95073941584911	6.96467901737935	6.2291602515997
TraesCS1A01G333700.1	8.80266313538433	8.67854142679321	8.73617014992078	8.46240021136726	8.57205170287551	8.65892899451482	8.68066159746298	8.39263701410195	8.77634380914836	8.70470313521706	8.79877173648617	8.4456887025473
TraesCS1A01G337800.1	8.84957657871645	8.9217028721021	8.92650273587871	8.84613747767716	8.69672735799662	8.89590163205566	8.91965343519048	8.74377995735662	9.03494826505073	9.04728190773636	9.02107752966215	8.77670582525105
TraesCS1A01G338200.1	7.90615288818597	7.86417861847688	7.88126339101099	8.00802179783625	8.02510109264574	8.04485404152367	7.9981547477717	8.13769586590902	7.83051262524433	7.80328455639382	7.7749156343573	8.06554128228406
TraesCS1A01G338300.1	8.23683961708904	8.24474020488603	8.20128986883151	8.11482433992993	8.14421596668557	8.08918092154996	8.11779747071683	8.07934172583827	8.11526840679558	8.0601055906058	8.09190945780645	7.82263037729221
TraesCS1A01G339300.1	7.82026369380686	7.82031846030152	7.82231921969955	7.82922308014011	8.10989393429827	8.0118842908641	7.94439185163621	7.86881138202309	8.01376581937743	8.01052175127506	7.87980736123069	7.62403463928618
TraesCS1A01G339900.1	9.17265280666406	9.10946993218604	9.16320983477164	9.1226943414901	9.15000297452398	9.14624068722034	9.16120672903333	9.12899616122747	9.1256615467222	9.1431258851636	9.12728935276938	9.08702965420302
TraesCS1A01G340100.1	9.08425906148864	9.02566759024967	9.09650498559321	9.02898195004043	8.99338891797323	8.86856267780353	8.96731222611771	9.01200261903374	9.05644686606385	9.07363399245396	9.13090654556553	9.10592061415366
TraesCS1A01G340400.1	7.5322467954456	7.5064343024963	7.4876636002328	7.22263312962474	7.76556671319135	7.70359968916659	7.49706967445936	6.98716190361928	7.61078350055346	7.66948371460966	7.59356853658376	7.2371518612038
TraesCS1A01G341300.1	9.34263021933896	9.31806893573033	9.40051231602564	9.35300762114092	9.29852254114115	9.38529571907841	9.42298511732614	9.44049576934057	9.25520738696349	9.34131083560177	9.34709551453903	9.29958444614332
TraesCS1A01G342500.1	9.49637093928473	9.43797818032064	9.46736966076324	9.37560806592992	9.49619578650381	9.56775283860584	9.49296697681368	9.50273442634351	9.39674552488582	9.44986325029672	9.34919251355871	9.43411676941957
TraesCS1A01G342700.1	8.61897228496858	8.53677804867306	8.54930175080373	8.40770581218033	8.63781479714801	8.67090552948152	8.63235629004707	8.74637474544687	8.55567685099294	8.62346094269873	8.61643577951394	8.64073899409186
TraesCS1A01G343100.1	7.49087848358947	7.43800837449595	7.07654832261508	7.2686525116885	7.70422623870913	7.66231442338967	7.59441227456198	7.44091605100383	7.49435294883193	7.73291371536296	7.53230667949463	7.57237245439967
TraesCS1A01G343400.1	8.5132711559369	8.6478088985401	8.40887933029774	8.61250439561352	8.59685513641232	8.85971233769633	8.80007082234712	8.80000185124618	8.72114105194959	8.55597869498919	8.49095872346986	9.03616082396375
TraesCS1A01G344000.1	8.66965976273417	8.58170243234284	8.69166110770835	8.70329031892213	8.70687202843973	8.72790655938659	8.75872289781781	8.61642731159973	8.79645072589335	8.70219130767461	8.76795685470354	8.591867756763
TraesCS1A01G346600.1	7.65546441466457	7.51767168139843	7.59967893363215	7.49233059198878	7.48858350559698	7.51435643286772	7.46156985493834	7.81234542605308	7.73748686394779	7.86065444308897	7.7764041861724	7.99519779004548
TraesCS1A01G346800.3	8.33822821242865	8.1207299925114	8.19376775946762	8.40177691887441	8.3484343465269	8.28182317328282	8.30465568660282	8.40661877520809	8.23780456736749	8.24278966832736	8.27239674067261	8.41727754445795
TraesCS1A01G348000.1	8.41580303195634	8.08774996817503	8.41184953054156	8.35116564786668	8.55069704179939	8.50027086527366	8.41220989347996	8.59807016071277	8.20737110052421	8.12542962187824	8.14296244441334	7.96755554661201
TraesCS1A01G348500.1	9.03650523178999	8.97317555585401	8.98453127268384	9.04815303261549	9.08456671518029	8.95469747782824	8.95532189673427	9.09608158943269	9.04702703890598	8.93108846738611	9.00912283979081	9.04988289354563
TraesCS1A01G349200.1	8.4640106212671	8.4400677359625	8.44623074908244	8.31348766363667	8.40969962236089	8.37181953829897	8.20525084266922	8.08457394031095	8.66648681880863	8.57876896257016	8.65907232926102	8.15229975124248
TraesCS1A01G349400LC.1	8.63824489473051	8.52316778224839	8.54178905303354	8.44093083231764	8.63391395378678	8.54516402090767	8.39766882936588	8.55063124553181	8.65840071193674	8.56751261460932	8.63715040742469	8.49324929501524
TraesCS1A01G350200.1	9.97319862652239	10.0236553526586	10.0349162743306	9.93063245600051	9.86990679695068	9.92529822593017	10.0191440296206	9.85514541797035	9.94067297261367	9.91556793405688	9.92850258842173	9.85510908563385
TraesCS1A01G350500.1	8.18299410140666	7.96822413711537	7.97210099152661	8.43089484004084	8.16626267001338	8.08528392783315	8.08464853697597	8.43803849371087	8.10781101084819	8.11972262646204	8.17546119272728	8.44004985943506
TraesCS1A01G350800.1	8.11939668922365	7.91888209694143	8.18836797013378	7.69381599479368	7.89804538184042	7.97334794278054	8.08909952075634	7.59271392405029	8.20225010543792	8.15338115016379	8.21193286556823	7.4011010826883
TraesCS1A01G353000.1	8.69108292688421	8.68709912199943	8.70347998347339	8.44830313327846	8.73328527564336	8.66665871499197	8.70105514786007	8.35369036384055	8.70539175928487	8.63550836610956	8.41859778704835	8.44172961587347
TraesCS1A01G353300.1	8.52203660622054	8.36468179247587	8.34541805715328	8.1775426167757	8.0423976836107	7.77938686405033	7.87180742143196	8.4537160758543	8.68550587964338	8.48060409459913	8.59631128334057	8.26699670647188
TraesCS1A01G353800.1	7.6754380567291	7.76687639155791	7.66032978388317	7.57115471454635	7.81571935578565	7.77049046422145	7.67170033546318	7.66020022103957	7.78405185545622	7.04319006466645	7.29841118851841	7.62263634915714
TraesCS1A01G354400.1	9.77405205629113	9.57064399232605	9.67173659034976	9.91669578987803	10.0892259698837	10.0019612313388	9.9795422321035	10.0204296563699	9.97076528446048	9.93628838006294	9.97089099017205	9.85874882825576
TraesCS1A01G354700.1	7.87776134924284	8.07323883404618	7.83518724598686	8.15369231035343	7.905232183969	8.00167085023281	7.99094274516989	7.98855799728291	7.58159667599553	7.18978926440077	7.67932771315319	7.94439820459558
TraesCS1A01G355200.1	8.72940397762564	8.65865665973401	8.67023677094662	8.60903976697335	8.71725723731536	8.80049026056274	8.7637096401472	8.78985158502642	8.47396953801737	8.56603103184441	8.45202631899094	8.64688911596595
TraesCS1A01G355300.1	8.01512238289093	7.40296642189801	7.65669583670325	7.48453724051409	7.73442117220062	7.60116323716983	7.23013393790683	6.81175931755859	7.86121529885711	7.7172951541999	7.88002326967657	7.23167600146692
TraesCS1A01G356500.1	8.19948409918745	8.30068187364552	8.18641599376598	8.32370692607006	8.29392439554512	8.34974836747513	8.32949845895458	8.24654998670447	8.20916563364012	8.14114608124342	8.150157797691	8.15029358320622
TraesCS1A01G357100.1	7.9365174322061	7.92569755991999	7.91349188735403	8.25298571987702	7.85117329411434	7.82089608215957	7.51156031134081	8.39570392038472	7.76429236586883	7.7417531031008	7.78687909399638	8.26443834329603
TraesCS1A01G357200.1	9.44361698567351	9.26677145161078	9.32139121604407	9.34546468678317	9.45281760072222	9.477840376859	9.55023994195306	9.40781326140533	9.50452192858841	9.44771195368349	9.50961670680777	9.46665087964248
TraesCS1A01G357700.1	8.19326480517246	8.1300815262534	8.14996505718245	8.13334209830317	8.04939346030817	7.92850728444025	7.99683818397253	8.08495062689469	8.14994821219436	8.26628727908819	8.22510692532736	8.40343865870087
TraesCS1A01G357900.1	9.62371723696468	9.57763945729594	9.60879343675852	9.54990625353028	9.57985030471283	9.5659694512534	9.6043782578485	9.62383902557161	9.66445016474001	9.63382345127834	9.66477148243721	9.60837210544757
TraesCS1A01G360000.1	9.69215193077191	9.65260203576638	9.55963524635774	10.2446432625572	10.072305881318	9.96153367751308	9.97376477019402	10.3892128098465	9.94187975871945	10.0680747162295	9.9414293423163	10.3582856681296
TraesCS1A01G360500.1	8.90327522783912	8.90119773606209	8.86667322801476	8.84415149273716	8.74171580444622	8.84190232007765	8.7533287567347	8.53184919864441	8.7985416919592	8.73553044110429	8.7427639471386	8.60199638093656
TraesCS1A01G360700.3	6.90508889193118	7.32273094889618	8.12961161851302	8.55181123304419	7.37488352557231	6.28680599914842	7.11463609303689	7.97794594191876	7.54488171561563	7.32945183822335	7.56653492964973	7.89657180519552
TraesCS1A01G361200.1	7.4183564426379	7.26693619497137	7.42362151962653	7.59989198921959	6.9050554802673	7.28429815786097	7.4216215578369	6.91657138584087	7.09126034543131	7.1606378862598	7.19795415270567	7.40399551971693
TraesCS1A01G362000.1	7.97002403970727	7.91496016777627	8.08514635884634	7.96562433578557	7.83694010860514	7.96992022748978	7.95483583360435	7.7323540431087	7.74753115726076	7.87935287762103	7.81336684047536	7.57974492802643
TraesCS1A01G364600.1	7.46676973857934	8.13172595617728	8.13029760534944	6.79447567152263	8.01989756553724	8.12921246293122	8.21937574865873	6.78699180710402	8.09945994656246	8.07816335407617	8.124403910446	6.78699180710402
TraesCS1A01G365600.1	8.29992812849273	8.1540543089715	8.23493075919664	8.29080789627466	8.33592789559654	8.33643027261254	8.33994788973604	8.24469438573761	8.23436587352978	8.17884802408125	8.29319064629078	8.38465322587368
TraesCS1A01G365800.1	8.30801441383587	8.07230708394111	8.13045483605218	7.58146779702512	8.29274325871772	8.37090760225132	8.3336768104576	7.8011660598255	8.34036089962283	8.32052434328203	8.34248008786183	7.66687675188382
TraesCS1A01G366600.1	7.56598020376549	7.35216909795596	7.49984370271434	6.87819566245287	7.62792218955653	7.44555711782908	7.60753185808247	6.2907440765026	7.54383002624365	7.53797555460564	7.60480340509617	6.07705353144233
TraesCS1A01G369400.1	8.88495326733821	8.63557678492191	8.7394330485483	8.7607837857529	8.88658909939074	8.83203642244648	8.86387832510609	8.77409800456753	8.83073040484149	8.82064379662422	8.83694277005198	8.71202975080091
TraesCS1A01G369600.1	9.29379470631271	9.37212507822986	9.31207116008037	9.25945052369821	9.14610852182915	9.2393611759746	9.23436335472296	9.27326879500388	9.20238543550496	9.18260454487448	9.25543894325923	9.26334359685273
TraesCS1A01G369700.1	8.17054208156796	8.04245367664851	8.10070842324505	7.86126355180205	8.4183036098457	8.40888021901022	8.38906027494759	7.75502779797638	7.87874126626877	7.72805856587987	7.76566210307076	7.4921506334787
TraesCS1A01G369800.1	7.83154905012798	7.89586525314284	7.83424236088855	7.72859716822461	7.06157435801537	7.23884969154148	7.36703522335993	7.70016282359823	7.41294732858974	7.43407341125639	7.47964819354527	7.96597480902374
TraesCS1A01G371900.1	8.98745021115139	9.01328639314686	9.02478623891626	9.0726635217903	8.92051394999631	8.94269816831983	8.9823922668075	8.96788841549716	8.96150689823587	8.9222459795974	8.97414218951363	9.04220221934943
TraesCS1A01G372400.2	7.98560403962064	7.83910556453684	7.87356656183478	7.51625460531631	7.82105810822577	7.82624980272597	7.80232782218353	7.91306031308612	7.96753721074421	7.84886361222855	7.91569067934971	7.97071948978716
TraesCS1A01G378000.1	9.43137795419461	9.41166282249375	9.44617471634037	9.51567903296558	9.43726403415055	9.43570848981632	9.44708288036258	9.56155738095922	9.41162538371964	9.34978828521281	9.43269798896944	9.60526746627436
TraesCS1A01G379000.1	10.5452837693385	10.5658555081507	10.6367208543944	10.6021602882761	10.5120673782719	10.4939708014706	10.4992367061175	10.6803785206746	10.5367143694185	10.5279222512464	10.4907698280893	10.7327676953735
TraesCS1A01G379300.1	9.20616788366188	9.07568864758178	9.11239420682287	8.98238989252809	9.17728956311973	9.11554242386829	9.08736159722296	9.06072802272055	9.12317595413743	9.0951522319331	9.02969654984778	8.9838538104867
TraesCS1A01G379800.1	7.48391319423288	7.3262009832479	7.32476609674943	7.17826433901864	7.35616133787456	7.15716138236227	7.25551235651233	7.47082367072873	7.08525019751827	7.15041246872065	7.06647206749725	7.40281308042625
TraesCS1A01G381700LC.1	8.97783030070124	9.09085664386899	9.03691525691619	9.01100095806233	8.80102676378225	8.85323833639031	8.94802929806251	9.05350791181735	9.06529068147179	9.07348964967946	9.13355378729998	9.27035576155966
TraesCS1A01G381800.1	7.25980846493756	7.28828547432636	7.51665359713721	7.0630125865675	7.66928025258685	7.52515283188229	7.50432767303375	7.2191526528659	7.72691895462897	7.46551063369482	7.60183881673894	6.60865372087398
TraesCS1A01G382800.1	8.24056971931205	8.15329149458677	8.22696144306163	8.22894580821075	8.25026912534803	8.2499255588648	8.29146418244092	8.25050779370122	8.45999272058728	8.37921937205931	8.16827493423262	8.24780916595832
TraesCS1A01G383500.1	8.30836207999255	8.26072202907048	8.23643872511587	8.74559540747714	8.31332825403282	8.15397865983524	8.16750500559476	8.71805022536807	8.32804789081777	8.43314823912546	8.39786090343985	9.04119461827696
TraesCS1A01G385400.2	9.36420333222599	9.32947523312269	9.32891111074789	9.29565569002001	9.3601632769194	9.32889232816723	9.35009516291414	9.37514321366188	9.29700103056504	9.2914757966344	9.29353056033383	9.24831214719623
TraesCS1A01G386300.1	8.44581375615758	8.31030655101382	8.27989830085377	8.67411840104335	8.69602431299796	8.64905427083656	8.58587036947084	8.58527724713023	8.63428540035209	8.60508093955794	8.651336242095	8.70695559812603
TraesCS1A01G387700.1	7.87300302295268	7.69613175655975	7.75770257576075	7.9491677206443	8.14173208054132	8.1270970202895	8.18111660922427	8.25091541849299	8.00031645147698	8.06740634381519	8.04963254426172	8.18964560599651
TraesCS1A01G388500.1	7.4950288188889	7.2088776516511	7.3724078694035	7.6696316318357	6.89671517363483	6.94661979339734	7.16319797692891	7.64738277752723	6.87144079936041	7.44384930692136	6.79472486886536	7.86197235954678
TraesCS1A01G388800.1	7.87898877728959	7.83563078063299	7.87083606164082	7.89998570523019	7.74275050304988	7.72435737214218	7.83322768288109	8.09345376767643	7.90924496484823	7.91418857694167	7.95575813439445	8.12832868706355
TraesCS1A01G389100.1	8.48970487330202	8.37730150049924	8.45852087553828	8.63664318718884	8.53994823137813	8.5207490317033	8.49699893624194	8.77605142304184	8.04013601380993	8.59795805471799	8.56985416119533	8.74894023670301
TraesCS1A01G389600.1	8.37958804243325	8.26718575986499	8.45327196001878	8.11431153521421	7.63285882931859	8.18026008328793	7.99041430626604	8.04851387805641	8.50010872472366	8.33568425787356	8.42816996946508	8.24029572035146
TraesCS1A01G392000.1	8.8330365160857	8.57935613339276	8.78528121181681	8.35976706265022	8.78988489538829	8.73752080032271	8.7258508648607	8.73154864479987	9.19759504509654	8.98408959124667	9.10126891813437	9.09717607492851
TraesCS1A01G392400.1	8.93322627208894	8.90376795965142	8.85388255720798	8.7216746632815	8.88291856558448	8.86335875721077	8.90256907919378	8.83195206758741	8.90313044420914	8.91985741897919	8.9520124131941	8.81287788378885
TraesCS1A01G395300.1	7.80511490934279	7.71092224623565	7.74827719927679	7.82039315351801	7.85889954322188	7.7984309038324	7.77884591293033	7.88385439165418	7.56973655649604	7.6315227984911	7.66457302909308	7.61206191980119
TraesCS1A01G396000.1	8.80371868073908	8.6218573303948	8.71232542120662	8.58837118152058	8.68480776147924	8.67933974089491	8.66953995932506	8.59570157596391	8.60669633897289	8.6392328956709	8.59670679467227	8.57827146107189
TraesCS1A01G396800.1	8.63209918890555	8.65506963835454	8.64619892604821	8.78634858720556	8.47107883571496	8.48088755907749	8.61269927674773	8.8012052504143	8.56627336223043	8.68793458371306	8.65081053135713	9.02115729892368
TraesCS1A01G397300.1	7.85044588354788	7.43460000607804	7.80340260038502	8.24371217521833	7.55398068003911	7.88180532127259	7.85636007539915	8.13486412449636	7.77156644976189	7.7574193102248	7.78969480738522	8.16659237467156
TraesCS1A01G397400.1	9.7329929407713	9.63312878566096	9.7538716250538	9.71636285028591	9.82974554280305	9.7836074355365	9.75345213048572	9.68772602927025	9.81822243565664	9.86228931734289	9.83007642817229	9.65970876803327
TraesCS1A01G400300.1	8.39420716217452	8.48555842107713	8.41698577588674	8.35083904524784	8.46454439659103	8.44427808028014	8.37519666937201	8.49366248683827	8.28214737469859	8.46770171339362	8.25664625907507	8.35804572192202
TraesCS1A01G402500.1	9.47101900952025	9.30004301600908	9.3434027482524	9.24498420075101	9.49190740099591	9.39946530478687	9.38405777090467	9.37082035861391	9.52729656607343	9.39657913132613	9.45406245831448	9.29990058616001
TraesCS1A01G403200.1	7.81794386524568	7.66602781003052	7.82634631225739	7.78819837190853	7.56903255413653	7.70232335197271	7.76800040226216	7.09359857436159	7.68666879276254	7.57565107989387	7.64288436503534	5.71428224962038
TraesCS1A01G403700.1	7.54322831487877	8.03567135079316	7.41461310720897	7.72737291894244	7.78957352931607	7.52708122116239	7.51127937966704	7.90937520434325	7.41584536608675	7.46757871776882	7.37122252486732	8.00119228393559
TraesCS1A01G403800.1	10.1846710731364	10.2118776480962	10.2060116878467	10.1146609903788	10.0910387965456	10.0426481337925	9.97773080051272	10.0822058949236	10.263136250869	10.2023556269817	10.2241795799626	10.3893224294287
TraesCS1A01G404200.1	7.67135159845922	7.57145891133645	7.28398102228769	7.77039146207857	8.05806048650017	7.86074427151743	7.46972306166774	7.84058967192652	7.99548181892473	7.87426491871641	7.78547153264558	7.48205400991796
TraesCS1A01G404500.1	9.59098864511109	9.63285512220861	9.6741807422655	9.67569807197697	9.59548377059497	9.68479494561778	9.69218515869432	9.69696268735185	9.60012171890689	9.65978299272756	9.65500983905554	9.64404830676477
TraesCS1A01G406500.1	8.05382185981279	8.22111426055356	8.15005224104978	8.14236675510491	7.92873051186042	8.08248933879995	8.09385267145549	7.78052756113091	8.31792268223777	8.2867636047975	8.30073056046462	8.13424876250179
TraesCS1A01G407100.1	9.3149168819107	9.30493847584862	9.25887913869166	9.31603183928927	9.40935808589119	9.43635739206428	9.38032899364914	9.44695286579181	9.34926203724307	9.39464484695896	9.38882231027871	9.47634702497624
TraesCS1A01G407600.1	8.23940176706394	8.19178012122843	8.25504887326838	8.0825513908867	8.22720912396685	8.1123899988895	8.13148427154268	8.16859369501297	8.1981665394759	8.11730916716944	8.0945663631239	8.05833960586503
TraesCS1A01G408900.1	9.17601806220811	9.11869708661214	9.15983959494951	8.5725911029197	9.01822749250573	9.09466872266786	9.09884292303896	8.68964073973396	9.11935099203254	9.11695803194955	9.14574436608303	8.7546869482775
TraesCS1A01G410200.1	7.55192261839319	7.50768215264916	7.56118566500894	7.691977644499	7.55404368295356	7.62855414574421	7.45157474057611	7.9181357929848	7.5980176657413	7.55321948404173	7.19528933628334	7.89272355025399
TraesCS1A01G411600.2	8.43021334442498	8.45635020175651	8.4883665860863	8.48425121544089	7.97981405833381	8.06096907027826	8.16611847498898	8.53434620511112	8.08687423628411	8.22721042644485	8.11949586291142	8.38324385790224
TraesCS1A01G411900.1	9.91323828224412	9.89501570745021	9.90664561527272	9.85418554781993	9.85206280679824	9.82288186085253	9.85152873652396	9.75417446365558	9.8845710225241	9.8782862847583	9.89010250059315	9.80347150900171
TraesCS1A01G412900.1	9.60081407959996	9.60719625589717	9.60743234751386	9.59661829285463	9.5931848085319	9.57094250578195	9.58508447832642	9.59696176883359	9.59702637192756	9.54307939538931	9.56833566350544	9.57428557250832
TraesCS1A01G413000.1	9.74875428164506	9.71642914934484	9.71353631758256	9.82750819860507	9.7739544673688	9.75657022296945	9.78659293874355	9.90963515857498	9.7505297772084	9.72305558137596	9.76008039742702	9.8270343720881
TraesCS1A01G413700.1	8.36777867092777	8.26117917039619	8.37865699593541	8.53003075864364	8.46026302275944	8.29697904853836	8.32511488098139	8.1198015015186	8.1884568785076	8.19170810949189	8.21601062616297	7.87385563777388
TraesCS1A01G413900.1	9.05873889797845	8.96775633667208	9.03997293779767	8.99613956502081	9.07813289170439	9.09283601530871	9.05499078200775	9.1599204841892	9.10832028654451	9.01561545620517	9.1308068378777	9.01416490431694
TraesCS1A01G415000.1	8.42292481814909	8.65674424752639	8.43981256130549	8.31705650645879	8.43173003365173	8.66595617289233	8.53537458694471	8.65732671623596	8.20174422031812	8.3071982059298	8.15510061869574	8.68594313532853
TraesCS1A01G416500.1	7.43425222614102	7.25748093388715	7.41325406579497	6.74964338059125	7.45276376848497	7.48476949470606	7.51933771246119	6.60793942837828	7.37035417589927	7.26045230186748	7.37557115610873	6.74102833371687
TraesCS1A01G417500.1	7.79645686303261	7.73797935251405	7.8017447992357	7.71251866095926	7.35910183636025	7.61953425249802	7.56952024728722	7.74905022014805	7.77355952987122	7.84396290489033	7.91486616571409	8.07874038374903
TraesCS1A01G419600.2	9.23841330798294	9.23136750394073	9.3305467574526	9.40907698438946	9.32356206375413	9.2313118886236	9.23764048618062	9.31111997356589	9.10583274165355	9.2023654728833	9.28256370951916	9.29784252224815
TraesCS1A01G420500.1	8.33982053639797	8.14108945805119	8.28706147291046	8.14074453889593	8.30917970555776	8.2255331906426	8.15420197718269	8.20706821358524	8.33016930571812	8.21103577931382	8.22211494237927	8.16556830807868
TraesCS1A01G423800.1	7.76416265599266	7.85582950465063	7.84251617388446	7.63285496042021	7.94410761231855	8.02931816095843	7.89700970985984	7.87630082971	7.87825991102526	7.93032811078763	7.84170904727254	7.66703848074502
TraesCS1A01G424200.1	8.53607006130528	8.47793012244887	8.57898906982103	8.59152693618188	8.56424289994671	8.60380838498605	8.59233280682561	8.45769932840315	8.60624865280195	8.51561430591643	8.53744413343207	8.47075112486267
TraesCS1A01G425000.1	8.53245721021226	8.46551822798634	8.46634657960609	8.60429732624764	8.44815438493976	8.59617794666267	8.52686779072704	8.5719823271756	8.65603357357261	8.82271082384425	8.78637084768505	8.81472579442308
TraesCS1A01G425100.1	7.47382189830224	8.31862428303045	7.72446218650328	8.12211940190097	7.72607828049892	7.61613004004029	8.25595852804082	8.34084239972624	8.09814113974717	8.16502759062177	7.50758659673195	8.34479573688087
TraesCS1A01G425700.1	7.75567599758921	7.62602863702023	7.70768741987777	7.57434095555098	7.77587650196565	7.73452281418311	7.75455971488229	7.62973266658072	7.77619462481407	7.71965329572482	7.758193518175	7.47238841720319
TraesCS1A01G427000.1	8.11493029695864	8.09630133759932	8.07220180727906	8.17810108609006	8.14970755925991	8.11982248991534	8.07687238817187	8.32504911476741	7.89186671754891	7.92456414532044	7.94336735933968	8.29500348553527
TraesCS1A01G427100.1	7.79735148565634	7.95783618157289	7.9568527667216	7.87560160485962	7.66978141153304	7.84951850188247	7.93112160323005	7.94597434052763	7.57947797531403	7.53884233507012	7.79495378574578	7.86331801880267
TraesCS1A01G428400.1	8.78211867135721	8.54584722352332	8.51271685366294	8.27581875787515	9.09171012744925	8.86100475989067	8.55286433620722	8.22516215646041	8.98435337615501	8.74366588244634	8.74419645451232	8.30080468727518
TraesCS1A01G429400.1	7.9897394969217	7.80688082023158	7.81432911814009	8.45239885402176	8.05194174216909	7.91897703708024	7.91986005927187	8.227212702722	7.90518836071047	7.87215452837718	7.88589177195087	8.44229394504478
TraesCS1A01G433000.1	8.44169446975447	8.32951964898791	8.36074242768281	8.47253515309571	8.43840416603915	8.45871685686649	8.44021013993417	8.45989775699828	8.26632408084181	8.3367998565006	8.32607046969606	8.36575703927118
TraesCS1A01G433400.1	7.60799807902594	7.61924881631647	7.7146815924603	7.27262037400487	7.56286156347169	7.69481832645493	7.69885364628405	7.6619849170695	7.79056893392599	7.65969823325224	7.664834355678	7.59712019064911
TraesCS1A01G437500.2	7.79413420621347	7.93838392888546	7.84551696720076	7.85814177479691	7.71155873149687	7.74402586141084	7.73788878864871	7.92304344522879	7.80452037930371	7.94373419501917	7.82482428501687	7.83967912788145
TraesCS1A01G438600.2	8.88922452269695	8.57559490016209	8.86779593829423	8.67164807715551	8.68098150050349	8.60914756235738	8.55994874381793	8.73154227298552	8.59141771827064	8.50571185037131	8.52618495532742	8.60343172117028
TraesCS1A01G440200.1	9.23086502414109	9.22184217061425	9.25867561439876	9.29863822243008	9.05521834342997	9.24792100163299	9.28656936436415	9.31176283932236	9.27287540473142	9.21286945645913	9.26839541132693	9.29383090811568
TraesCS1A01G442500.1	8.82616262679677	8.76634069756987	8.81128662863193	8.77392229407109	8.78525453370628	8.74476193159702	8.78704022209784	8.81998683430147	8.84919519829197	8.91172353348326	8.86894486717424	9.01113558536296
TraesCS1A01G442600.1	8.3304925542505	8.24148441403458	8.33361979726913	8.27602732527074	8.24779563246464	8.19324872296372	8.29239139989172	8.2873601168578	8.28379741249333	8.23411303592047	8.32039546975535	8.32788308073491
TraesCS1A01G443400.1	9.40513901226132	9.37162576213332	9.39560688750448	9.31218881133324	9.33307683406184	9.39728729123279	9.42754868649146	9.31543520657876	9.37549430592064	9.34886119789094	9.36489627071357	9.29125137093963
TraesCS1A01G443500.1	8.02026751324003	8.22265806876118	8.07518984704226	7.86897637912018	8.0605887165497	8.08845148705499	8.04637423134317	8.05076876662237	8.12723805941055	8.23930611959659	8.12193934193782	8.14936992778637
TraesCS1A01G443600.1	7.9299640745985	7.90456849742542	7.87389379486207	7.54949191542236	7.89116685035116	7.88386279342329	7.79836048937157	8.08412416276908	7.90070529833815	7.80835661448744	7.83105932637749	7.85349044190281
TraesCS1A01G445900.1	7.75744720153027	7.7325998454367	7.75966647745419	7.57514513095857	7.77918354488054	7.70785884290593	7.70652067288237	7.77424838705495	7.8079233119682	7.71194304139757	7.73539140888104	7.48019422517891
TraesCS1A01G499000LC.1	9.58967628428547	9.49376367907253	9.56301678426471	9.03286631784071	9.44543840737054	9.36531024582902	9.37240205341901	9.02830132370868	9.5927073778667	9.6899054348473	9.65363809018997	9.0792577321584
TraesCS1A01G512200LC.1	9.39833799830515	9.34030799952755	9.3682208609739	9.36712051592781	9.39832686099678	9.30846008543857	9.30529885650906	9.48860686769379	9.33728374473858	9.29835557566533	9.34902412733141	9.45833162650211
TraesCS1A01G538600LC.1	8.1163948398476	8.20175037540549	8.25312392692376	8.2286539613899	8.21728825626879	8.07189721947334	8.09547754150485	8.25814896029702	7.98385859836605	7.97945971876311	7.9084047375526	8.12838855249994
TraesCS1A01G540700LC.1	8.83509788917915	8.67875726128648	8.83952883891627	8.9783221094177	8.74307069646964	8.64128584547293	8.64901874750559	8.5572735921821	8.9255251081036	8.95874999022746	8.8163309884519	8.9304900401858
TraesCS1A01G541900LC.1	8.10626932306159	8.13494910885032	8.18960983263558	8.16049519530213	7.94652545595024	7.92349735240012	7.83920867882001	8.07595323062332	8.14131529996361	8.16420168942229	8.06866862601692	8.41297501815272
TraesCS1A01G542100LC.1	8.82872305375887	8.91876405290532	8.86770650486213	9.41664390268522	8.73856517797608	8.7638519728662	8.81202851755002	9.2737010670404	8.96822066820742	8.97684759099942	8.97910797495607	9.58953930982593
TraesCS1A01G542300LC.1	11.1267101176453	11.0624307301359	11.0248749941736	10.9180714268054	10.9620050183059	10.774555538244	10.9148455154737	8.6701675561577	10.3387737067111	10.0898002937398	8.89842243737608	8.90878811025683
TraesCS1A01G542900LC.1	8.45416392710467	8.27750285612022	8.38617119899513	8.51722835407936	8.46225944626098	8.54314962716898	8.50595195878029	8.62949102152032	8.62757921328041	8.71137239140796	8.67831816804008	8.77206257364226
TraesCS1A01G543400LC.1	7.97059405003765	7.70915940710182	7.8457037416226	7.96626614870892	7.85564191741876	7.80668965513987	7.81891076326851	7.96458728465787	8.00510767668129	8.18922974276715	8.13182113994469	8.28892283250198
TraesCS1A01G543600LC.1	9.59182817801101	9.45762260121132	9.5159635925562	9.62309811813779	9.42589594115145	9.30820173417338	9.29479756686316	9.58384394240134	9.57624503288377	9.54807914957726	9.54723630741315	9.90311923623653
TraesCS1A01G543700LC.1	9.30896640438831	9.15060621452893	9.25773671531105	9.36169674766281	9.17614992367732	9.04197357715476	9.06075264132885	9.27364997732432	9.32875709902581	9.39306919043107	9.30174606113073	9.63957494211393
TraesCS1A01G544000LC.1	8.12481862039064	7.29055414401686	7.60528572845817	7.98881721223371	8.27355398489009	8.26309482437262	8.18677115228526	7.96912745377886	8.35197885899468	8.30203490670066	8.3310954903183	8.231298349563
TraesCS1A01G564700LC.1	8.14800155556726	7.54499085714632	7.86192401813635	8.52997267974006	8.49956660052893	8.4125261476792	8.35162094013576	8.60590431868058	8.46355208419414	8.45251459906364	8.47562218753009	8.66905631594448
TraesCS1A01G611800LC.1	7.62280824719893	7.3372793437181	7.33945716361104	7.61762845956772	7.82330513277773	7.73658347451439	7.52892762770445	7.70388977744462	7.98639871482967	7.86449189938972	7.9231110686495	7.9279118285108
TraesCS1B01G001100.1	8.39016845830854	8.39478035283149	8.36321682105885	8.39385074353425	8.41299415982191	8.41100172893264	8.42836011769734	8.34001203555708	8.34140118571562	8.42835854396102	8.41047890345457	8.39716416690727
TraesCS1B01G011000.1	7.05619260153524	7.00429231378468	6.92440252826971	6.46901377142607	7.03544559169316	6.8513108433941	6.85315223561649	6.37162712646515	6.97610233987078	7.0719070600968	7.1417182006122	6.37162712646515
TraesCS1B01G011100.1	9.23252839081222	9.38141647704365	9.27332909789351	9.31138256769608	9.20342446489363	9.25093494410494	9.2089278250699	9.21323923334767	9.28300843509292	9.37425764296392	9.27306809339331	9.11733646109786
TraesCS1B01G011600.1	5.7229539209018	6.06914009562664	5.7229539209018	5.7229539209018	8.25634757874203	7.34811708915926	6.52949704155323	6.79760314618199	5.7229539209018	6.72505914717509	6.44615703814844	6.8652152781017
TraesCS1B01G011700.1	5.54790573716074	5.81098022354027	5.54790573716074	5.54790573716074	8.12507169401775	7.13579657170034	6.52949704155323	6.79760314618199	5.54790573716074	6.7359874343142	6.44615703814844	6.83410681855404
TraesCS1B01G013500.1	5.81098022354027	5.81098022354027	5.81098022354027	5.81098022354027	7.70180616729913	7.1119108211529	6.52949704155323	6.79760314618199	5.81098022354027	6.72505914717509	6.44615703814844	6.83410681855404
TraesCS1B01G017800.1	8.81713355580803	8.69797765689953	8.77283069559259	8.45707778696809	8.79120504703985	8.78002980249239	8.76039152270088	8.6639059893045	8.78853897333069	8.78798516827248	8.7999499893964	8.44645407393821
TraesCS1B01G018900.1	8.84921842394869	9.10163988207913	9.08861833610922	9.14164545339723	9.19474934601341	9.16710011887337	9.1456284023115	9.10902140580703	9.26090014858835	9.24207822952309	9.29217929117068	9.09078949848154
TraesCS1B01G019100.2	8.85532054388258	8.70788331241744	8.78246760330588	8.83622778509614	8.93066627195582	8.88662661600024	8.86851830917045	8.5290339760112	8.75349970625105	8.70009953495237	8.90370615618259	8.63096617359055
TraesCS1B01G024500.1	10.4174748323302	10.4437289821918	10.470567804612	10.3796669281681	10.4053956520104	10.3599592737976	10.4438057093913	10.4710482713694	10.3153853790917	10.3189464400736	10.3601605935591	10.4379940700046
TraesCS1B01G024700.1	7.70101037249859	7.72277783121075	7.59392948463892	7.88512797474708	7.91918948696543	7.91138036961471	7.83926592816688	8.00434620664859	7.80612925828802	7.78610058320606	7.79673302406269	7.90646938476423
TraesCS1B01G037100.1	8.56075527464728	8.70338766857249	8.62461140156336	8.60723148537607	8.57049927021741	8.58534694920314	8.55878059295947	8.48119823491227	8.43608297285732	8.5121825876909	8.4242506274235	8.50001375018919
TraesCS1B01G042300.1	7.7908013935601	7.92204386168649	7.84295072544355	8.22343088021977	7.68893230923639	7.78225871583621	7.74908205834863	7.94862966904809	8.23172877668298	8.3072466712024	8.21560329847308	8.59850551146528
TraesCS1B01G053600.1	9.50101684240901	9.50185756356407	9.49479804560136	9.40936514273519	9.56171948062547	9.47745186903024	9.48686556794589	9.49916627224851	9.53512779134266	9.52493414114348	9.48460008840124	9.45414356598499
TraesCS1B01G058700.1	8.73667975304642	8.76417914964052	8.74431276928002	8.58792621798608	8.74220709926159	8.72688456855199	8.74534019125784	8.54822621553071	8.7847739760959	8.81404331817187	8.84481682494571	8.57427822723113
TraesCS1B01G059000.1	9.77626624016295	9.74155583368031	9.75758557803709	9.77533747930413	9.61222528736208	9.57339297874153	9.57250539126189	9.68299621090054	9.6406634377151	9.58587295118964	9.57576580726833	9.6811667176907
TraesCS1B01G059800.2	7.44177621729661	7.18493363221484	7.34788176089326	7.49040457597653	7.07941056281213	7.1709949109198	7.18734446971882	7.77816080035695	7.08352376065255	7.21170731265681	7.26908798835903	7.79997270548537
TraesCS1B01G060900.1	8.30135390173017	8.24851933321563	8.27254263139615	8.15369352827549	8.30233772040281	8.34707850207409	8.34527441532383	8.01746840639412	8.22034467842238	8.21927090843049	8.22944744605033	7.77651014183082
TraesCS1B01G067300.1	7.49616240763098	7.17883617797637	7.49151669384221	6.62187943469801	7.54320023993884	7.6609934922383	7.57833904304581	7.50047115162002	8.15217422186156	8.22171444507291	8.26909300220361	7.90808829643023
TraesCS1B01G071700LC.1	8.00854828835872	8.11502727341406	8.05014169895373	8.09996388025186	7.98005056745219	7.99405281609907	7.89210569285715	8.09603519656112	7.86085672161497	7.81903771547664	7.86341515572449	8.05518719171472
TraesCS1B01G077500.1	8.8511089199511	8.76292011158027	8.83053394324022	8.86484515337692	8.76495884205785	8.80862563325661	8.87442056463004	8.9038621555041	8.63012623147764	8.65774460519637	8.71729419977603	8.59030291735274
TraesCS1B01G084700.1	9.27455156612645	9.35189515216188	9.3143936279173	9.33416110821336	9.17396779811347	9.04567593885882	9.10436926500522	9.07648735251524	9.2245702719034	9.29421625315124	9.2270179284694	9.36679929180071
TraesCS1B01G085100.1	8.50165880779255	8.47178896385067	8.4544511605051	8.76254509922502	8.58843714337478	8.51802539233901	8.55902440872091	8.77548704862555	8.55875141053752	8.47041928086085	8.50578929105438	8.72916478840212
TraesCS1B01G090500.1	8.94275018619292	8.90424661950623	8.90927616161672	8.88971182746229	9.00042537454803	8.98536478652697	8.9822447605258	8.90963446796525	8.98614900815908	8.98452349904987	9.00377847992216	8.93935085455729
TraesCS1B01G090600.1	9.16062134772317	8.98890357383488	8.97563620615268	8.92346587025516	9.30523887844769	9.0855843002128	8.98693790224501	8.91220848875701	9.22824968733858	9.03635206277908	9.06475544577622	8.8998550979946
TraesCS1B01G090700.1	8.3008241035943	8.3030565641949	8.31797890408052	8.21407581130229	8.36918883196205	8.33331697012412	8.20799479898637	8.26101744763086	8.40932861042972	8.42204428812627	8.3852680239605	8.00319978870878
TraesCS1B01G093600.1	9.07697159611479	9.11620404210442	9.18345929201667	9.45143126615925	9.14053491315669	9.18001125510449	9.16985269498308	9.38925594111817	9.08311760008893	9.17892464175318	9.11918253138751	9.37271654262142
TraesCS1B01G093700.1	8.28874721820596	8.30187068368242	8.35309923885055	8.24782171519527	8.33663696426294	8.40687134593877	8.41455546008121	8.29365675365025	8.31273014111883	8.33514524928215	8.32960345363622	8.30611336093709
TraesCS1B01G095800.1	8.91271966180684	8.92313729822944	8.86066293732784	8.82675456177827	8.77170513566482	8.81831146576845	8.92011701460982	8.83691292164384	8.86935118195926	8.70842230540466	8.79782121507094	8.98358697066984
TraesCS1B01G096900.1	7.75680379933225	7.3789206894349	7.42135453250353	7.00596099100333	7.40984107598802	8.8117242071194	7.36730465690796	7.78659557533063	8.80313907052626	7.42951383852859	7.47813084601755	8.29222166983856
TraesCS1B01G097700.1	8.40016243213006	8.37893643632754	8.4020711798434	8.56942715825264	8.49818431017384	8.47343309702074	8.51089087685057	8.64907948852102	8.43192366882246	8.34882313653178	8.41072140128777	8.57207930024173
TraesCS1B01G098000.1	7.16027872543592	7.62202669760574	7.63499189800014	7.48976057799444	6.60656433144684	6.73301935689157	6.60397871324767	7.47421551060463	6.83571892307222	7.16921485467412	6.88420824905745	7.40865931217659
TraesCS1B01G098800.1	7.29933687715465	7.65845287116935	7.43254524525422	7.65203486928376	7.03338635843136	7.20861295295968	7.48706013803768	6.39464143795163	6.95775707314731	7.27059045147219	7.26341201807138	7.08209105960248
TraesCS1B01G100800.1	7.65971295123206	7.86166525292382	7.70975845264416	7.72262305192423	7.83265349252265	7.82221747833443	7.74753091394436	7.51789349402797	7.68749185089947	7.67707200759653	7.65366305275647	7.18352557925727
TraesCS1B01G106400.2	8.04780185379606	8.31933730296042	8.23425378077808	8.77546473781327	8.29676593204282	8.03245320601503	8.06048604164427	8.95372989147792	8.18027306969452	8.28465356580968	8.18961073703496	8.83592070544475
TraesCS1B01G107600.1	8.18953127552782	7.83523353719547	7.96025075866239	7.50459020243556	8.11601202799639	7.93181847296501	7.94115323513001	7.5147249029768	8.16109552635319	7.92214497729393	8.0210104154622	7.46552256128271
TraesCS1B01G107700.1	8.93000564296808	8.91599422374291	8.87799038837155	8.90462400420001	8.60604858190496	8.76786801429189	8.78371385477525	8.91002549563329	8.60305782025968	8.52892058615326	8.53607003708006	8.45844653608629
TraesCS1B01G108700.1	7.4074684435805	7.08258215503898	7.24433208233959	7.27894820959866	7.42436122988341	7.37092993130733	7.53321501280971	7.66308828559316	7.38235461276845	7.25971064433724	7.30375660789642	7.65309083236244
TraesCS1B01G113300.3	8.09543989871202	8.10253291004965	8.14823221036517	7.91320743734486	7.9131162809201	8.04480600313224	8.12395435523748	7.85238847814858	7.97667679443775	7.96851416629755	8.13000897439978	7.70776821152477
TraesCS1B01G113400.1	9.21264455613298	9.26009728035513	9.21626735299829	9.13347426779562	9.28677572136043	9.30492478123673	9.25709239813766	9.18790794705052	9.27746320206923	9.30916628252711	9.2676885504222	9.07928337437862
TraesCS1B01G113500.1	8.09391867282421	8.00550702100584	8.03372716827685	8.05054888822706	8.27831103334901	8.07697584777924	8.13877499909018	7.958703346812	8.30249750225284	8.21859906933041	8.29625538092222	8.0048029093568
TraesCS1B01G113700.1	7.6032184947517	7.59703841233704	7.58691704149023	7.42431585808496	7.92905970740233	7.80369475516664	7.75813749649054	6.63224352412968	7.81124940516871	7.68299446911527	7.6765542218226	6.43364078245582
TraesCS1B01G115900.1	8.03024592967754	8.03278544316985	8.01461356918668	7.90394181280762	7.91308179353609	7.90358680095553	7.99739404487487	7.94908640776896	8.04023373950251	7.89009578979806	8.05152398664519	7.91371705136333
TraesCS1B01G120300.2	9.06212389078465	8.97768438505257	9.02891217008544	8.92980303625212	9.07310602185056	9.00183670285154	9.00614684349157	8.9634281165207	9.07383684085591	9.02175222188891	9.07785732774805	8.97605429517863
TraesCS1B01G120800.1	7.20291449833127	6.94201154269834	7.10745396930214	7.59379816092847	6.99740044270939	5.36575087658903	7.11163294499043	7.65834613155381	7.21220599317302	5.36575087658903	5.36575087658903	7.36997076016339
TraesCS1B01G123200.1	7.70005528144828	7.60006607271227	7.76908999420667	7.53510305602146	7.45878798477527	7.34239558638365	7.58763092344326	7.79490682998994	7.44039662544109	7.43278159198117	7.45338920909884	7.40397940777491
TraesCS1B01G124100.1	8.72016118161434	8.72386877737971	8.67116039450618	8.65342738430371	8.68481178178405	8.7545140489851	8.73416075254806	8.77819995987444	8.85738169553081	8.9360863006662	8.86252484481212	8.87318441109029
TraesCS1B01G124900.1	9.31569993432193	9.32115502264357	9.31887453418079	9.38351297474913	9.26043037980295	9.26196360363693	9.26039983256846	9.35616982211997	9.19842682841753	9.24080431445154	9.24574921446831	9.31244335870224
TraesCS1B01G127500.3	9.13170447094172	9.00743044116038	9.11984574201131	9.23301217968958	9.06465581948786	9.0763022737236	9.17101746227168	9.23318959722745	9.22697165095899	9.28737686465406	9.24825376325825	9.41502577719037
TraesCS1B01G128500.1	7.43030171101968	7.03246063112823	7.40935734926689	7.17175132210674	7.53844596874287	7.35786655866386	7.28263358727443	7.29532238345026	7.18932464847648	6.86662072423962	7.20171098287457	6.9182022656287
TraesCS1B01G129500.1	7.50922988969995	7.710596549209	7.47082847508945	7.60506877737532	7.12221733443414	7.39950247432322	7.39855267237133	7.5728259557992	7.44425241891366	7.57697945977622	7.48465494616667	7.82360291479647
TraesCS1B01G135200.1	8.99271843629524	9.08990808558934	9.04561260567914	8.80461543925789	9.09238543954797	8.86674617405786	9.02685122389436	8.72905455988767	9.01670755664436	9.09849137808851	9.02336987721862	8.73037383046003
TraesCS1B01G138700LC.1	7.85487963585017	7.68806867900043	7.76098460000643	7.62924934278097	7.64247497600172	7.68168383662205	7.83431713237456	7.71521467887673	7.92247790648974	7.9454874894324	7.97898399794062	7.98624271533845
TraesCS1B01G139000.1	7.50243500486108	7.35394013927686	7.32396662567916	7.47129177803622	7.61780518838516	7.60105888909194	7.49449480973299	7.31687210306376	7.23679031325308	7.25446908753957	7.10724842457702	7.13297967454279
TraesCS1B01G139500.1	9.5894332478631	9.61569386358032	9.60987942514524	9.46228698242183	9.66042391123978	9.61287707408801	9.62519697775213	9.45255904314508	9.55700238263505	9.57005515787183	9.55848210046288	9.34728728428538
TraesCS1B01G139600.1	9.76347132674879	9.77301399639175	9.77397030467152	9.65841636084674	9.81069196450873	9.76957819318142	9.783082119231	9.6575931396125	9.75645835348336	9.76224051297331	9.73820111032691	9.57685648694451
TraesCS1B01G141900.1	8.8113331877822	8.90554778875709	8.85588602876875	9.03753650756502	8.87989398840603	8.84581674443101	8.8604477986834	8.92029350778364	8.81562001772715	9.03544113555093	8.99159605994941	8.99597890273819
TraesCS1B01G142600.2	7.69225188214144	7.67851271275342	7.68415466841772	7.46930485745017	7.65861932112204	7.48008504135247	7.56705282743469	7.36011870986865	7.77534448489056	7.78013704462892	7.7744176929644	7.72811582543827
TraesCS1B01G142800.1	8.55608814959036	8.43778585285554	8.47798945492825	7.90178086565764	8.38679845714461	7.9669997235061	8.4465583976009	7.72560475725864	8.65255771130698	8.5024356637014	8.69355844425263	7.56900704731166
TraesCS1B01G146200.1	9.14096239757982	9.1086410293962	9.15136619604828	9.05088240576039	9.05281138774947	9.09033432544559	9.11585365733594	9.09268350691514	9.08660224862583	9.09888409781088	9.10697976829101	9.04137486319012
TraesCS1B01G150200.1	9.21480180012509	9.20507415364021	9.19555277941297	9.0739447592037	9.17114446546998	9.1791026579153	9.22210526840579	9.11154761890823	9.26182251994291	9.22260479864576	9.30657117168044	9.32919050480991
TraesCS1B01G150900.1	8.72656533875922	8.59072210673939	8.65224684193107	8.77736046958575	8.84027608177363	8.82282602402338	8.75174259082771	8.83178742636794	8.77925351607759	8.80077504491874	8.78411882637599	8.67007273522091
TraesCS1B01G151300.1	9.61088435982828	9.66753228369511	9.64945814982104	9.7088134076883	9.48627342688792	9.5225884939034	9.58565215040636	9.74534417739487	9.65189907624721	9.69357767568313	9.70834045395437	9.83518478224468
TraesCS1B01G155700.3	7.71093141779891	7.75118489117137	7.74149638259704	7.85930992713127	7.60459499461528	7.61723128805443	7.65112206846839	7.72484562665767	7.67735823250917	7.72085714639071	7.67373930031682	7.77487961749925
TraesCS1B01G158000.1	7.75978917452467	7.5861992972388	7.68851896738271	7.52956201316629	7.31040639873557	7.18975600132575	7.17737172971133	7.70433646357991	7.73726585169291	7.67565666148275	7.66113778291953	7.62108601951407
TraesCS1B01G158100.1	8.34558024211232	8.33914949454615	8.36536005165052	7.79074030656817	8.32213494544858	8.30828798445361	8.3132599811377	7.64873315169993	8.43203272793792	8.46347858899466	8.42297483794067	7.66970940783255
TraesCS1B01G159100.1	7.9286400658655	7.89624425872129	7.88525809169537	7.38523502058318	7.93671609429271	7.86770875900326	7.88674818803424	7.25630235700816	7.89048785008515	7.94152172710763	7.95934590803573	8.96583157760353
TraesCS1B01G159700.1	8.90410429390744	8.61853000062358	8.92774835522809	8.91550696684155	8.60780192881233	8.43970230322933	8.7814552048197	8.97339964623697	8.62406608487354	8.94001069211539	9.02977127804554	9.25599052555877
TraesCS1B01G161300.1	9.16798486027619	9.05107433250745	9.08617199937727	9.10361761807962	9.06639733604771	9.03248520125485	9.0861474579842	9.05357022947389	9.13384595912328	9.07875730346321	9.14870377386294	9.06624918779291
TraesCS1B01G162300.1	9.55924051794725	9.52566084056376	9.52244334996047	9.58863773130721	9.60487806272441	9.61850100346946	9.62989297021468	9.60008280066736	9.60841114163891	9.67936154726117	9.64038637688645	9.5723810662496
TraesCS1B01G164000.2	8.77320525445378	8.75908669586019	8.74633386777962	8.74063578202979	8.76299562277273	8.65032848088518	8.73213206450179	8.60464705478355	8.67498755352848	8.63114880942165	8.67935978576619	8.51584973932109
TraesCS1B01G164500.1	9.01134483367039	8.75241173819116	8.8997638310015	9.10707755372433	9.3193332440955	9.16915728309293	9.08886642917289	9.14851785346745	9.16772609991286	9.25464677371828	9.17301312488196	9.08453615659531
TraesCS1B01G164900.1	8.3316438881599	8.25470221770451	8.231964768782	8.42809785210284	8.54305013022892	8.35369164827067	8.33734025248991	8.49851282398674	8.3626462748567	8.27579873534681	8.22124450861177	8.41383830203116
TraesCS1B01G165900.2	8.69195001330652	8.73269299519973	8.77613883998443	8.66734776966223	8.74557617830104	8.70584292630531	8.76039337231272	8.69668948440264	8.69664129854065	8.6944650215745	8.72353058105927	8.63864941727386
TraesCS1B01G167100.1	8.26444459107745	8.35307912971337	8.27107893039108	8.53251467673855	8.30144148932336	8.30078080222418	8.33034603406391	8.7537470271988	8.28855080734441	8.30362836923334	8.3256958313067	8.69310960192288
TraesCS1B01G173900LC.1	8.76044567060799	8.59652732349867	8.77323793575225	8.69850716205346	8.71292496046837	8.66660589499728	8.75349431302483	8.85758406849175	8.69300816178703	8.65157335839008	8.67726761375964	8.72354333080444
TraesCS1B01G174700.1	9.66808981812759	9.51579643498136	9.58010842996357	9.74813150004162	9.84949475481266	9.79606795262963	9.80643074687142	9.88506278308621	9.80576884747992	9.76788316373124	9.80695456133612	9.87487478336336
TraesCS1B01G174800.1	9.32096947513567	9.22826749463394	9.17858570948631	9.23949876077856	9.24851116372838	9.23531000041324	9.24310606677331	9.31920077974954	9.24510780433915	9.32158315406777	9.25729452416693	9.35013259271576
TraesCS1B01G181000.3	8.15521984276218	8.22051266242471	8.20035831659558	8.04160355365563	8.14285248026981	7.98432935639146	8.18078008938184	8.01215438631511	8.04306514283814	8.0347599561152	8.05319648669115	7.93296372292258
TraesCS1B01G181800.2	9.27097195611417	9.22047484649711	9.27866894736499	9.31338398045271	9.19349784062118	9.17552783122321	9.25396682012772	9.30619149136524	9.22517414482368	9.13132291328545	9.26619070591669	9.24333084548597
TraesCS1B01G182400.1	9.42063794509971	9.40655662422018	9.43971953414856	9.40110563127031	9.15950158545842	9.18735613752777	9.25719812278153	9.25183948808488	9.50900862917036	9.52383732766722	9.53850013886981	9.58967277193404
TraesCS1B01G182500.1	9.51032310039048	9.47802862497081	9.50483148134697	9.46548137334212	9.36286079934832	9.34346950846471	9.39704957679927	9.44021370438911	9.48837916952825	9.54584530350043	9.49143207559875	9.60727106670495
TraesCS1B01G184700.1	8.11853326490788	8.15667881961797	8.1611330128078	8.29725795459241	7.9909030855469	8.05859016978057	8.05990513588978	8.06771415066607	8.07396490940666	8.09505534310972	8.05508133877367	8.19442077981576
TraesCS1B01G186700.1	8.59381280628529	8.67777445529529	8.70378570549468	8.49654940346621	8.49941968165639	8.46056139160321	8.57588265192267	8.53859381632475	8.56525001559098	8.53258575526413	8.68639460231646	8.6027453606061
TraesCS1B01G188000.1	8.81942529068808	8.76585918333749	8.79516673147454	8.69373657671454	8.7917849099784	8.78670984939826	8.82326546289232	8.7790302922334	8.70842941594669	8.74218517581011	8.77237611216187	8.6477523266953
TraesCS1B01G189400.1	7.96047170244581	7.97353628419773	7.80153874668706	7.07284863067187	7.97941944346142	7.66203321163509	7.83939156649955	6.73701426366378	7.83696892181849	7.97465477662576	7.99039651351113	7.4205728517205
TraesCS1B01G191000.1	8.79956396445082	8.73210432242925	8.71648280836029	8.78155294982714	8.86683096318668	8.77499487892956	8.68048776594856	8.80420343646768	8.73117315697686	8.71661662501405	8.71647811611041	8.77186917294692
TraesCS1B01G192400.1	9.69153577963439	9.73268529217809	9.74198344448889	9.70940075623761	9.76018496532913	9.75944021784459	9.75558740402295	9.69774718275405	9.70678231879395	9.74956930182529	9.72066007547355	9.6380652615063
TraesCS1B01G192900.1	7.9509537026204	8.14011049507872	7.97026725813406	7.73863239252161	8.13800890360518	8.01344873078621	8.03507533754449	7.88656915096504	7.97258388735326	7.87817659262885	7.94383478458063	7.66176259759168
TraesCS1B01G194200.1	7.8833764608566	7.3602072916529	7.45589078749243	7.11221730988844	8.06260100725132	7.91676004368989	7.5521048966975	6.73766659635247	7.9902456406394	7.70036526207033	7.64463798786016	6.16220171741827
TraesCS1B01G194700.1	7.73868291433391	7.38315521027586	7.28049778757085	6.86450330809276	7.84092622621193	7.82607443043214	7.70389052812662	6.20924531529005	7.74172516610437	7.81122854062294	7.68513190635189	7.01282684245607
TraesCS1B01G195200.1	8.41413600624887	7.94670996415664	8.34980649140213	8.50148888508155	8.20316184367871	8.30086387557538	8.18165399780826	8.61916689769849	8.34363477649102	8.29205307078197	8.34184605408217	8.50705247306471
TraesCS1B01G196000.1	7.64820668215168	7.44693228354335	7.51437678472146	7.61974671435632	7.65048322914455	7.64666560294957	7.6798195688813	7.82538628112545	7.79609441362058	7.82963884683429	7.84797609635021	7.99494639054876
TraesCS1B01G199500.1	7.9385390062677	7.63999626654434	7.99543573643082	7.88423213339257	7.94388188138145	7.92524885086826	8.09899013832488	7.74245554939509	8.14555235750803	8.10129774278064	8.17538308514255	7.74506895432515
TraesCS1B01G199600.1	8.37760330444678	8.26480822753217	8.28192836105002	8.20911761799526	8.5636801398993	8.3821608015655	8.40755358447444	8.2818377402465	8.63295255369913	8.61637989634539	8.67925544523232	8.64238016470822
TraesCS1B01G200200.2	8.61495495599565	8.56769714590149	8.5716266661834	8.40951953677473	8.6100776306413	8.58720287650474	8.59139338921681	8.36871288820481	8.53707755914271	8.3989913284291	8.49337610749562	8.22789447244937
TraesCS1B01G202000.1	8.8090771212615	8.77570332041869	8.81676831235248	8.85185461111801	8.83814460081022	8.80540220874629	8.84119119415146	8.82658624646317	8.80196246219418	8.81821561242618	8.81744578736604	8.83367378673844
TraesCS1B01G202100.2	8.43669726103748	8.39652230149209	8.46891904792137	8.91940840000728	8.21231091928034	8.1684816712112	8.28861039821298	9.20153856020854	8.4990369820326	8.56042446329078	8.56813403914894	9.10917900761273
TraesCS1B01G202800LC.1	8.80267319963426	8.63745431046907	8.70368547867549	8.78099037328851	8.79616617638671	8.78018797467567	8.78554550813938	8.84743137328931	8.77614622533767	8.83108377379119	8.71927954882767	8.82958631904715
TraesCS1B01G205300.1	8.36587844668425	8.39518846123453	8.4237314267805	8.9905658627915	8.80026410938462	8.58060996104427	8.63233701577114	8.37854802356255	8.60461984398563	8.67287186684664	8.63128237844185	8.96218493315005
TraesCS1B01G206000.1	8.1025598179459	8.0785003177222	8.05463342786056	8.12271653073918	8.19634936135803	8.10419866417674	8.14191610422128	8.2119176101832	8.18318856085168	8.1527171764587	8.24207623142695	8.22180510642635
TraesCS1B01G206600.1	8.57055924233179	8.60470022004566	8.60495228223613	8.64548187783357	8.64335997550068	8.6983705281572	8.67439392086658	8.76974847115519	8.61437548114429	8.66861766613998	8.70060552861793	8.65807732467632
TraesCS1B01G206800.1	9.24691777543415	9.22802196115796	9.26762513578481	9.0585504909998	9.14885353224065	9.06868594287824	9.09971256553106	8.91025717047696	9.2610359368569	9.2864503806075	9.2642776755576	9.16236765770872
TraesCS1B01G208000LC.1	8.8839265878461	8.79557478061836	8.86586980360533	8.72611100999258	8.89615061364222	8.84379716206579	8.86308433927871	8.83909675564202	8.8145833771463	8.78198419534032	8.81720580840942	8.72503501594363
TraesCS1B01G208100LC.1	9.42547288756653	9.310452329862	9.41113035331379	9.51193480613784	9.53581083473967	9.49423475810085	9.46783473872651	9.66228282786948	9.03843212443368	8.7965892703823	9.04150318088927	8.86481835348024
TraesCS1B01G208500.1	8.97845538066115	9.01684108349042	9.0164946881929	9.13202880087145	8.85986031424092	8.80862406367721	8.92630521468571	8.93732201821443	8.97285497526954	8.99202742802231	8.99209431791613	9.15668250603826
TraesCS1B01G209100.1	8.34776451390886	8.39725173970737	8.33131924925722	8.30302032583623	8.36622663388758	8.37998387083809	8.4166048191743	8.32500580683245	8.34118878531708	8.25743663815995	8.29773776597422	8.32067282569857
TraesCS1B01G209800.1	7.04214960582229	7.03003048876127	6.95554195502571	6.73472651293873	6.69353617254854	6.94668168584621	7.08021391022434	6.73407944062562	7.22416187921901	6.14474466088792	6.78620957001988	6.88815212197937
TraesCS1B01G213600.1	8.19627122672579	8.28852033359165	8.3611648883604	8.12281253620654	8.15253016980021	8.25085402708056	8.24780694807926	8.35599894743316	8.47851877784402	8.56424920732731	8.46782028359263	8.17619531166992
TraesCS1B01G217000.1	7.88295328040494	7.83061954588717	7.7793115032415	7.92822961350268	7.96091617720979	7.88724566168649	7.8174643397802	7.5768499741079	7.49901996380405	7.60365833773388	7.56719639734318	7.92971984658442
TraesCS1B01G217700.1	7.87484413679901	8.0602331307112	8.02505121945321	8.09954599189961	7.8652073492215	7.87013100680227	7.85848090028787	8.08539052502099	7.990619835178	8.07186544718312	8.09398611781171	8.35120539822485
TraesCS1B01G222300.1	8.00785328411108	8.32967543712033	8.01642280267072	8.2392931249653	8.14975889313294	8.4543494807334	8.25200331061279	8.48094195524287	7.81554995919008	7.88437550662094	7.83680042826958	8.71355659060305
TraesCS1B01G222500.1	8.64316191595596	8.66396657739919	8.48520712690774	8.67345740556359	8.63835927678208	8.59431498519888	8.57524243534898	8.49716434895252	8.50909007324467	8.41639042463859	8.55701956336107	8.43180339851731
TraesCS1B01G223300.1	8.10714260846177	8.20820430302828	8.18497154053361	7.91916544063696	8.20367939783297	7.63751785170816	8.14820921537422	7.89834342932513	8.15128566180374	8.16152359260912	8.09778769995562	7.76216775633262
TraesCS1B01G224100.1	8.64467309349903	8.66371104620419	8.64757286563812	8.73669320937306	8.66542146413879	8.57506496707189	8.62398441239267	8.4655910477667	8.61121198639869	8.58502807410725	8.63391255958757	8.53317609807379
TraesCS1B01G224200.1	8.23832001218062	8.28427532304517	8.28475883534767	8.28986214608769	8.16447750314093	8.24321429477357	8.32340218251573	8.39644358173081	8.21349515741899	8.21928003778449	8.1784756780532	8.31788507726365
TraesCS1B01G225700.1	8.29908379367216	8.28058772981061	8.3816854115973	7.93404319591718	8.24071038494213	8.29795044229028	8.28028476561022	7.85755439836355	8.09010493842584	8.1594566384247	8.13013496295228	7.63692583496435
TraesCS1B01G226500.1	8.98644580255059	8.9782167490429	8.9529574078239	8.97710748727392	8.99485531509127	8.99104743698854	9.01198997110509	8.99754811851273	8.97151896068971	8.94287618954472	8.95972876119081	8.94721102813675
TraesCS1B01G227100.1	7.38160788645039	7.19436099241083	7.34785422993348	7.00624641678433	6.98753778601013	7.10151159900817	7.24515434923015	6.86258533248137	7.05594941222855	7.13556722140993	7.08363245575327	6.56404432206739
TraesCS1B01G227600.1	8.6729868362009	8.67448368848266	8.6209521837209	8.54100262705794	8.734838163303	8.74909538969004	8.75592385627508	8.74849789925614	8.63780955121534	8.69555112081991	8.67354218784945	8.6544945929942
TraesCS1B01G229700.1	8.63824489473051	8.52316778224839	8.54178905303354	8.44093083231764	8.63391395378678	8.54516402090767	8.39766882936588	8.55063124553181	8.65840071193674	8.56751261460932	8.63715040742469	8.49324929501524
TraesCS1B01G229900.1	8.96814783195524	8.88736576349668	8.90727673887536	9.16425350688674	9.02805027768187	9.06700477670258	9.01042774931657	9.25676977631091	9.12498192813759	9.10986497085539	9.12263945623691	9.4393753510987
TraesCS1B01G230500.1	8.85369163715585	8.91045601461393	8.86468355890107	9.0528155737703	8.72045287267655	8.75058030302566	8.72222576443161	8.98786422301736	8.84575302042783	8.85280268534294	8.88230503344729	9.07978173794721
TraesCS1B01G231000.2	8.29044421748068	7.81363258337048	8.11512603383374	8.36226793693565	7.65917265682548	7.60142086449004	7.43155730438039	7.1131527084306	7.60500247992773	7.21738796698655	7.27098395301363	7.45158610452971
TraesCS1B01G231400.2	8.98592075192485	8.82052504976292	8.9057919575225	9.06943873276026	8.24331628257203	8.26353628192889	8.34167910889481	9.13661899115539	8.24721712349186	8.30525010581934	8.31445667954347	9.01143329455012
TraesCS1B01G232200.2	9.54443690531471	9.47065196445305	9.48402182937727	9.3908773111592	9.54651073539067	9.49204539432199	9.49853291240391	9.4441965885429	9.55765265936638	9.48854676342716	9.5195739942106	9.46230472508477
TraesCS1B01G235500.1	9.49765061074784	9.57184061044074	9.5516774213712	9.50023448714408	9.58872650131674	9.56205491625149	9.56652904731877	9.49296547391356	9.50125905833776	9.54058209213593	9.52563816928912	9.44459845253655
TraesCS1B01G236100.3	8.80407818380804	8.66947673659503	8.78196269148589	8.70808007234516	8.84491325563915	8.93536019650895	8.88316123346014	8.735842809858	8.91124968883728	8.92180389536695	8.88511018606799	8.7087138737268
TraesCS1B01G237300.1	9.54541490131667	9.46952837554976	9.51011901332014	9.48774600337059	9.48457343991148	9.47199293972351	9.5017776855657	9.5398582733345	9.45970740824254	9.41614674235003	9.47012221352918	9.4155556479079
TraesCS1B01G241400.1	7.50113048671099	7.95454245847485	7.87003891734908	7.30774258467357	7.68856198491674	7.89632233190192	7.82456480695443	7.24964034999877	7.83816282486295	7.62760526490158	7.69581894741473	7.19417690449697
TraesCS1B01G242100.1	8.36567861477338	8.29955244457595	8.3461041379583	8.43887687993136	8.34949075005258	8.34304259876555	8.29561760335243	8.57982721205441	8.40386599216969	8.38719136240541	8.40583058677626	8.50855030826009
TraesCS1B01G246400.1	8.42167363816128	8.27495092894021	8.2812232736071	7.56808650184884	8.60489403537551	8.38547622642925	8.30862966345255	7.36227021579555	8.48629163478695	8.41241272416266	8.49537459920574	8.53154430997549
TraesCS1B01G250600.1	8.69672804573228	8.26184616233737	8.27518898544971	7.87711066981402	8.82455676172933	8.4306806986487	8.20436616628468	7.70862644933039	8.62239287528182	8.28382643380416	8.31579805647662	7.7337677806188
TraesCS1B01G251000.1	8.76706938662251	8.70985359562562	8.75161421922516	8.64807875257219	8.73355533957455	8.76019254231647	8.7382026649209	8.55000291787349	8.80340951271411	8.8180061862323	8.76323997356318	8.61620766716895
TraesCS1B01G251800.1	8.59116680586989	8.51981291580468	8.53238939718362	8.34444610110004	8.53397811448492	8.51285340087376	8.59657665409875	8.37273689795455	8.7616213191772	8.76935822540191	8.70857743930257	8.60236532625827
TraesCS1B01G255900.1	8.82532152985992	8.6921956970179	8.78097850816778	8.57670404810604	8.71621356968871	8.69780516995214	8.70439367660563	8.58584589406743	8.68337341756014	8.67361198376841	8.71166065566641	8.52031806710214
TraesCS1B01G257500.1	9.35494507670538	9.39047525434105	9.35116606909485	9.26738671527127	9.41937320595498	9.39070777367448	9.3927402846054	9.32322782862526	9.38459992834348	9.32662091775918	9.39391059642099	9.20830175090163
TraesCS1B01G258200.1	7.90667652089417	7.98958514820443	7.86364566695386	8.11391735836343	8.23523183596101	7.89367082850307	7.85735430442259	8.39086257495847	7.87299202851814	7.78883134800601	7.87270015495558	8.09384407157236
TraesCS1B01G260400.1	8.99602639286424	8.91388934870674	8.91051817435273	8.87104875298658	8.90603615580222	8.95306359125513	8.81463732032255	8.97685900728295	9.02019819399089	9.05339482680393	9.03685232643138	9.04529959510771
TraesCS1B01G261700.1	7.21357776047986	7.05960092805081	7.20021857537004	6.82745006383204	6.98438713937637	7.06329881930016	7.2976266554183	6.73562719477743	7.20627987014852	7.07556688878135	7.30197691630137	6.40142648006369
TraesCS1B01G261800.1	8.72530856027933	8.73464653073821	8.73339987490181	8.64887944934361	8.52461048965911	8.59220244977932	8.60622063993975	8.54460034051287	8.79225771469327	8.91077820084986	8.77933209258547	8.8835993146794
TraesCS1B01G263100.1	7.91696435651212	7.95718720087429	7.58559230922433	7.91624788648229	8.10127718188928	8.09199721016793	7.9869551551234	8.02016743335626	7.98368610873819	7.779758814718	7.72671283371216	7.93908464190816
TraesCS1B01G264600.1	8.23512876297946	7.99806051558332	8.19157589263622	8.11520194655168	8.057717441549	8.10258666181832	7.99791726551046	8.18742597797324	8.0084198514384	8.15891916857784	8.03315554411458	8.33361183642192
TraesCS1B01G264900.1	9.51389395415557	9.48322421898588	9.56479196698881	9.60421788524833	9.79997726390001	9.42083376094551	9.47823971035548	9.30000586387971	9.55939615535775	9.65947552090438	9.56486153763551	9.41418125363303
TraesCS1B01G268000.1	7.88164909285101	7.84458197114521	7.95086326287139	8.46245586464955	7.89704492238141	8.14866562293671	8.08679917491262	8.41916373042213	8.21304456960046	8.28923460093904	8.19681051036352	8.73134734896258
TraesCS1B01G269700LC.2	7.30428188317575	7.24102551542439	7.24612908433365	6.88170660178515	7.30716533328292	7.20799530048805	7.35438176344447	6.70092579816699	6.8859308856835	7.14018309948977	7.1512784015737	7.08556664362319
TraesCS1B01G270100.1	8.39255685423012	8.47381205568154	8.41515126942842	8.30053961930251	8.54114561954862	8.41010117977065	8.51322366831352	8.4351814324537	8.45217955736584	8.41948411326892	8.46130839307759	8.14636314060784
TraesCS1B01G270200LC.1	9.43951485643534	9.20891899853223	9.32017623553611	9.21995240041881	9.41816603101376	9.34214661338045	9.38677528869389	9.36639157902139	9.39198748347445	9.43580746437746	9.39854598348155	9.28285263795556
TraesCS1B01G270600.1	6.85294937041477	7.47784088122145	7.13382938345019	7.19642689982507	7.16307910402257	6.88222658709616	7.56530158114552	5.48975693812819	6.32276898207178	6.75062955552701	6.8748887854686	6.33384773329759
TraesCS1B01G271700.1	9.24174366400703	9.21065430937976	9.23767544299603	9.22714202659219	9.25386462790919	9.25248837385835	9.24190003900595	9.19114568794153	9.23939520221281	9.27755732132325	9.28554616027798	9.17277569839693
TraesCS1B01G271800.2	9.19872040377505	9.15533123143122	9.18238775807271	9.20785436919521	9.17031768591372	9.1691370442186	9.17415419396986	9.24948985969202	9.17308245913827	9.2080048754502	9.25226258363015	9.1502291708262
TraesCS1B01G272800.3	9.10445625485934	8.80189412131911	8.8973838179996	8.41562926745355	9.07612535350814	9.33171485569712	9.35761037479577	8.38260838549688	9.38109216273924	9.43686843819468	9.27946324500754	8.73547871739452
TraesCS1B01G273000.2	9.07472456409802	9.09162233149538	8.98642499925303	9.11684821945571	9.0402324991912	9.11192431945517	9.07047314942834	9.01221247912847	9.12502401042006	9.12443760281625	9.04474849503932	9.0771815057133
TraesCS1B01G273100.2	9.07415214430129	9.14096633763589	9.08347300576857	9.17870167086529	9.04758005310856	9.15188081038332	9.06294918690567	9.05534419445126	9.02935237878171	9.13805985998534	9.11678539896941	9.0505438745724
TraesCS1B01G274600.1	9.33371310851135	9.25437471321203	9.37858697547312	8.88162550015508	8.95716348705809	8.98424476926491	8.93759372462461	9.02627701294576	8.93799788519672	9.00011753353199	8.95479973858609	8.92436203274141
TraesCS1B01G277000.2	8.65732481470913	8.47754468108423	8.52704626737686	8.54171850970727	8.42366863557149	8.43553887001651	8.33956828358699	8.31678454034771	8.70671305875062	8.50297050712025	8.63800769885438	8.450791551877
TraesCS1B01G277100.1	8.2832986589023	8.16374658094153	8.20672800914511	8.24049175921103	7.93894334553857	8.06328427194888	7.9870752610575	8.00413111912961	8.35094244911357	8.18951046950437	8.37612305721119	8.04722881369447
TraesCS1B01G279100.2	9.65439406069549	9.6288130363338	9.67340466659222	9.57806436637655	9.55762328470607	9.59033236619185	9.53884504537054	9.5808480175627	9.63246837562474	9.63148110580472	9.62993747317896	9.74660137093774
TraesCS1B01G279800.1	8.47224760317703	8.25813746476266	8.37316458766578	8.49073583876321	8.36242608090074	8.38666409095047	8.45750797224162	8.5180549269163	8.51540715277366	8.23473351342012	8.49702171974313	8.70419786591417
TraesCS1B01G280200LC.1	7.7302577141892	7.3095534638407	7.81873282421896	8.16239523490737	7.41029670385337	7.48500729317127	7.49351683115318	8.1322285050598	7.75640981370915	7.73531900755796	7.59921436752406	8.58939265547446
TraesCS1B01G280600.1	8.9567033522877	8.87877991394082	8.89998655091495	8.84840193954847	8.99893623429804	8.96277626043107	8.96533632564657	8.83510172549896	8.98490260848218	8.87438274157842	8.97270060638158	8.81524809115436
TraesCS1B01G283300.1	8.78767967730621	8.88653921542221	8.74668653700907	9.21158376160069	9.11746690764604	9.16220880141914	8.74687581402817	9.38583864366394	8.68488122327794	8.83838866933122	8.77627665343672	9.12519387284974
TraesCS1B01G286800.1	8.76314798820913	8.5675236184324	8.67136954599082	9.16531798285149	8.48348723028218	8.45218751196169	8.29338966021702	9.06660301667196	8.51981784006303	8.64588419592323	8.60259079340256	9.23041562556731
TraesCS1B01G288000.1	8.97995870102971	8.92896328073388	8.97707902196781	9.08563408803386	8.88136520162095	8.87266944842337	8.96953947170414	9.07872238911607	8.87001845851481	8.9395582222124	8.89791251941469	9.02330646855865
TraesCS1B01G289700.1	8.8959199472993	8.79754011612558	8.82414546176513	8.86051376720724	9.01569847487191	9.02846609820695	8.99840908317942	8.76181719552311	8.9959430634731	9.04040504145448	9.05287186208746	8.71904173739127
TraesCS1B01G290800.1	8.67685198354944	8.74713847045479	8.73097795037892	8.95583562541931	8.61786523880244	8.56614526759486	8.60173834338173	9.01622389243309	8.72854230604019	8.81453975803188	8.71300140396345	9.22846476721069
TraesCS1B01G291500.1	9.13036257022892	9.01011811671211	9.04282380046933	9.08228061039181	9.10832232995367	9.06501101435139	9.01778169564284	9.17472922777854	9.04548284894422	9.05884500843137	9.03978433364027	9.11952600346011
TraesCS1B01G291900.2	7.85178729845607	7.82249012060464	7.65175274804363	7.89389668649403	7.56090712801413	7.8387716122275	7.7952869293633	7.99622767514767	7.92441787516424	7.90931069771747	7.98377791224261	7.98536933385163
TraesCS1B01G293000.1	8.49886491971376	8.61279568824213	8.5080931450243	8.61419353364525	8.4943160005687	8.54212415798686	8.57351897023396	8.86725944482432	8.71565420191212	8.51253561852442	8.69908909188914	9.19298283663623
TraesCS1B01G294300.1	10.3363547374378	10.3226416059866	10.3543178563465	10.3708479423302	10.3581306712317	10.3666597861638	10.36116330385	10.3478379723198	10.3682464853484	10.3282969566794	10.3563540514049	10.2831585241844
TraesCS1B01G294600.1	8.02113502361525	7.9422570776702	7.9924390041085	7.97723843363984	7.96224110181449	7.71405048439681	7.79592604533004	8.08792443555016	8.16334463281026	8.14586898419966	8.16390147377248	8.09741146178651
TraesCS1B01G297800.1	8.75979016064014	8.68622841434058	8.72263302409762	8.55494237033444	8.75463535011136	8.73680994180219	8.73606749561096	8.62590591335141	8.80347665071696	8.72924912696108	8.77102309887917	8.59039017587441
TraesCS1B01G302400.1	7.2794819063044	7.01669637795823	7.17585404229933	7.5383529827481	7.56122004636914	7.30597862993374	7.34778052764926	7.54334100222564	6.65041880731145	7.3062732693632	7.26743920616571	7.80095656750284
TraesCS1B01G303200.1	8.65408674684254	8.44604646458136	8.62752614778365	8.44892989413266	8.51778105760561	8.41737401763355	8.46390249852486	8.49726018184812	8.46725985877981	8.47283530117503	8.4723316229955	8.38513454196009
TraesCS1B01G303300.1	8.40294352035904	8.27080904874635	8.36660379612757	8.27368603696395	8.18473619286453	8.08507377180915	8.08618592958147	8.2730600572849	8.1537752470674	8.12437993531698	8.13941249939328	8.13827076351973
TraesCS1B01G305000.1	8.74140911887763	8.61437890978056	8.71357456212876	8.50285325732044	8.65922971050319	8.61446443697772	8.66576854225777	8.66746847116738	8.67755278818336	8.67442760913097	8.6673407568504	8.67491647260715
TraesCS1B01G311200.1	8.60024805693118	7.86908541696738	8.51473409652506	8.42758846525011	8.09794916409168	8.05151617461778	7.88802808504711	8.25117565383812	7.83383208265834	8.01497018802298	7.90109168002359	8.42906544801922
TraesCS1B01G312000.1	8.59828182497968	8.58725540513434	8.55063725622469	8.61181559689891	8.63375417971236	8.55713002947729	8.54453563530408	8.70273938638995	8.65188679393452	8.5830693594825	8.61479319097557	8.64808178351329
TraesCS1B01G312100.1	9.07415460203018	9.0486798929534	9.04546027613144	9.01180359316108	8.93733094202985	8.89483419810576	8.93844449221844	8.94249983347838	8.87475557022952	8.78714561861157	8.89211040180414	8.79791686859268
TraesCS1B01G312400.1	8.85228250700822	8.79934016114357	8.76241384489838	8.71521097790322	8.70624073504902	8.74907689919592	8.70188186475846	8.72975110403687	8.70020616107532	8.71713513897688	8.73036627730968	8.715252743053
TraesCS1B01G314600.1	8.44386812663613	8.60911391262191	8.5037945089147	8.51396633432576	8.60986314194056	8.71418013353043	8.66489264843079	8.71137589293981	8.3320183923853	8.41362529313361	8.33962583075329	8.71906213354147
TraesCS1B01G316400.1	8.46732710731803	8.42059546429663	8.45599963158303	8.42226063027486	8.46158204557349	8.40865006913122	8.4145452683386	8.44036440965045	8.48620475629716	8.41192038933247	8.4470154472903	8.3520537370977
TraesCS1B01G317500.1	9.45913798904688	9.42173835309402	9.48649655283661	9.42768951992955	9.28631119565025	9.33324211604911	9.3034664388982	9.20830592437381	9.42493323307295	9.35583967015583	9.40887741555222	9.43529980462976
TraesCS1B01G319100.1	9.19159759242535	9.16553196602691	9.14586342411692	9.24068692649457	9.223420413353	9.198271879186	9.22269780539673	9.30188490560497	9.2164796330089	9.16115105590143	9.18162138716858	9.22459913919259
TraesCS1B01G319400.1	8.43266261155623	8.64837493004515	8.5431646166458	7.8121143725606	8.45969649078874	8.4545449114003	8.4926446254418	7.86884536209782	8.61008540613114	8.54525784921948	8.60436808413078	7.88810892852345
TraesCS1B01G319500.1	8.14831610183242	8.05355831838072	8.13399968138956	8.05873263632398	8.26103586725241	8.1484755093787	8.18892204855801	7.90131035102854	8.17600835981671	8.17850510698755	8.24841381098037	7.94562734374543
TraesCS1B01G321800.1	8.5263014096336	8.41786123959446	8.41218110558617	8.61505238034342	8.6011116700597	8.46618323318693	8.45479773298959	8.26173808073531	8.49193757477818	8.46042913298826	8.47102618513046	8.63122775229842
TraesCS1B01G322100.1	7.39942228207096	7.68147362584274	7.97572363701326	7.66323353774995	7.77849506349912	7.93949904814572	7.91755689388957	7.71232838401879	7.95746920849824	8.20786668455075	8.11690564229595	8.02547609248289
TraesCS1B01G322900.1	8.47004602388263	8.39864163085511	8.46322545824647	8.46162894752365	8.35991264366316	8.43266795824108	8.27400812082483	8.52860669622923	8.35717672075597	8.53271602299642	8.43412101087246	8.43779776905363
TraesCS1B01G325100.1	10.2235289743154	10.2671555436595	10.3063083588833	10.3136095169451	10.1242903920559	10.0552489879354	10.1111737783037	10.1988682103035	10.1939532362303	10.2287004260085	10.2098830405545	10.4101439648967
TraesCS1B01G330200.1	7.87426737944314	7.77619838535322	7.81397095854718	7.7479383367035	7.87197179387896	7.83132676971298	7.83668680135135	7.94624122273097	7.85700169316055	7.60537139860303	7.89533977186187	7.79107379937907
TraesCS1B01G332700.1	9.27399660727526	9.20772795894274	9.27510904619061	9.20484788917791	9.09308203760174	9.11493105107426	9.11424415726894	9.08249767581761	9.19875974948584	9.18925924423653	9.20303614269616	9.19376534279565
TraesCS1B01G334600.2	8.82399405714314	8.77889267970118	8.8095745163725	8.6636027259964	8.77239025292489	8.7859128240166	8.84897611205267	8.77141018951604	8.80115514651248	8.86204612153244	8.79111156754827	8.83540400978428
TraesCS1B01G336300.1	9.20998100672653	9.07692715274941	9.13244780327317	8.9991421587243	9.15999812301714	8.99480780585977	8.93122092587301	8.86765224839981	9.16860900749039	9.38429932190924	9.05660392347545	8.95926166955976
TraesCS1B01G338500.1	8.11143054637205	8.15107893293877	8.17147811471308	7.56970179621994	8.12828560595655	8.08257545264075	8.04720302112534	7.60854763510976	8.17460583489247	8.15359808859905	8.13645287608063	7.66992253893434
TraesCS1B01G340300.2	8.75222675650282	8.60306594405611	8.73148607394787	8.62310966818973	8.68290208230414	8.61063733135924	8.61475811774696	8.68502087018762	8.74118741194936	8.75700280218655	8.79217128008866	8.71030901896783
TraesCS1B01G340600.1	8.57774131174396	8.51832540424312	8.52860340095839	8.48305506758637	8.53599109058684	8.55743504314417	8.60286871409719	8.60117265650148	8.46702062148224	8.56253046309898	8.55738530987786	8.535922340244
TraesCS1B01G346200.2	7.97119105183871	7.68786856187824	7.32744915361801	7.87949197886169	7.76491549633436	7.38228682289577	7.70528215648591	7.4008072609993	8.1080759758724	8.10412825250059	8.17217526072032	8.15695993068168
TraesCS1B01G349300.1	9.35873895865557	9.26716869438236	9.32350253988732	9.30421997372735	9.35718808623227	9.35483666630321	9.33729411102722	9.42199072718278	9.32281045436331	9.37391141851312	9.29139774197426	9.33857837629684
TraesCS1B01G349900.1	8.53288439195132	8.33990708650579	8.45666136861506	8.48742088736571	8.33765969201843	8.41310988285833	8.32119266879706	8.57422499257028	8.56277621470347	8.43717714914977	8.45844568219152	8.59475089095161
TraesCS1B01G350700.1	8.11963870020339	8.18288598999011	8.15316213193121	8.0511505629835	8.02616034708663	8.03514328384236	7.92725193674822	7.79363699716909	7.66992572083078	7.51904972818417	7.57431941843943	7.27981567267859
TraesCS1B01G351000.1	8.1245468863056	8.0501990770414	8.03789765498056	7.9800769836928	8.26770798929219	8.10164477653941	8.02497698436844	8.1818884896101	7.74918555510229	7.78962070467858	7.64772125922934	7.71260830280678
TraesCS1B01G352200.2	9.17282449645396	9.1169743063225	9.16932074010934	9.12395123909285	9.15575243164495	9.15104183161934	9.16606163609787	9.12899616122747	9.13036709663103	9.14686559605588	9.12912826652555	9.09247558924885
TraesCS1B01G354000.1	9.33907321301202	9.30628237054304	9.39816575124949	9.34917789257002	9.28774367906584	9.37986929426255	9.4203597763167	9.44049576934057	9.29454272742225	9.38129607490889	9.38578402248897	9.34485770136292
TraesCS1B01G355600.1	9.47105085297074	9.43168463595387	9.45455226352883	9.37456448937821	9.47764750636794	9.54710909525434	9.47100701635065	9.48168867682843	9.36050508400723	9.4165241611544	9.31576964437501	9.42379692716517
TraesCS1B01G356900.1	9.57904119444312	9.48491866017576	9.55316621879607	9.03238196428671	9.4315229048446	9.35156528236941	9.35714128909694	8.98825698215631	9.58267361081753	9.68097254917249	9.64678320945932	9.03818158401646
TraesCS1B01G359600LC.1	7.75328574804944	7.64381154037531	7.37616495951726	7.08911789289281	7.5917593800674	7.33274075516376	7.3318854030623	7.54102200057283	7.64193541067859	7.68223016032145	7.59017467556965	7.61395639188812
TraesCS1B01G359800.1	7.92141606732487	7.70274503761813	7.88958657416874	7.6859895327986	7.85380163044986	8.05220496523659	7.82420125146886	8.00957815969487	7.83522783539224	7.80026814188506	7.63728743412615	8.04211060431381
TraesCS1B01G361400.1	8.46273651434713	8.40348991260104	8.3744598876832	7.41995909519939	8.48611630538331	8.4086352736108	8.36601179915585	7.55882923837382	8.5204178757322	8.45553061013927	8.51724013774384	7.45835059568414
TraesCS1B01G361700.1	8.38166307832438	8.25848994479896	8.24707069834652	6.76326545426546	8.37976524843901	8.34705120386142	8.26819846153349	7.1307723539518	8.38483558757131	8.3339016358498	8.36545657827826	7.14111239285599
TraesCS1B01G367100.1	7.96786146062232	8.14144595687289	7.93188544730853	8.21825864005733	8.0286987954699	8.05014573862095	8.01710083216784	8.1516451310491	7.5596188153366	7.34797984353906	7.76442266430903	8.15686444098209
TraesCS1B01G368900.1	8.56013101706814	8.62129914878539	8.59107362441692	8.21134936094134	8.54948004935872	8.47359824464056	8.47188349432419	8.02234109115062	8.66853582845579	8.64092665429619	8.60260203984793	8.34466379234198
TraesCS1B01G372600.1	8.26837312200109	8.34784231040537	8.26134124887975	8.37336639396088	8.33477360575422	8.39882439327826	8.37002543071532	8.29104633046876	8.27070429363602	8.20045990347804	8.23135450116024	8.21949630319316
TraesCS1B01G373900.1	6.82450149065075	7.06049274044075	6.82708287545239	7.01832506305635	7.35451462732319	7.03203345602109	7.03692354041096	7.95609770563409	6.9665341483231	7.10176346052005	7.16918130171452	8.1222817488352
TraesCS1B01G374200.1	9.43967024203011	9.40378961440912	9.42488392242373	9.41029579818959	9.44851274359591	9.37280637134289	9.3871924846472	9.51941262902105	9.41082391590064	9.38361872897837	9.42313606517347	9.49622216933493
TraesCS1B01G374500.1	9.65018176274405	9.60066732729468	9.63069569973608	9.57441523574345	9.58934836903071	9.59033662372175	9.62831471349015	9.64318660654995	9.68080376178853	9.65883695782318	9.68836489904043	9.6280864729859
TraesCS1B01G375900LC.1	8.67622508528154	8.39037604644418	8.37769335683933	8.06944780667673	8.8918809630877	8.73126179569713	8.49111901525699	7.85043393027858	8.87582373251933	8.56653437876879	8.58528217065946	7.89465867770607
TraesCS1B01G376100.1	10.3968414851592	10.1332613210909	10.2772221954796	10.5995225113281	10.5178542719622	10.4487823357309	10.4812929513901	10.4842547353697	10.3001848561185	10.4651338991976	10.384386135726	10.6972350846474
TraesCS1B01G377000.1	8.78651702737323	8.86431263882026	8.80638572947509	8.71425447302026	8.71635387813955	8.773406999343	8.83746435263043	8.41371884250922	8.99779882159172	8.89041149796979	8.96702634866241	8.65436384330468
TraesCS1B01G378000.1	8.64271921206259	8.53560253287222	8.57061669277428	8.71033192637836	8.70662795174675	8.6917312696485	8.66781731094541	8.85612737395568	8.68159811555589	8.59740007006138	8.66400907121444	8.73369135183725
TraesCS1B01G379200.1	8.98451732573522	8.72332865103932	8.89400141397816	9.39354463033163	9.02105785202451	8.96312969002459	8.94176730611432	9.17316800472397	8.89041866509083	8.9202642293992	8.86913956708438	8.87710872072927
TraesCS1B01G380800.1	9.05259945833113	9.1650413677658	9.10027619406055	9.1513724561553	9.15674721858517	9.12430773752048	9.08680087795024	9.21020523277172	9.14844529672411	9.19716868868899	9.1150313658331	9.22232231344138
TraesCS1B01G383400.1	8.33258233562725	8.08177937536663	8.13604338312914	7.61407748244604	8.31664928075051	8.36211279967856	8.35256618387979	7.80574515360723	8.36040596659362	8.32638421079361	8.35540009673192	7.60760900306717
TraesCS1B01G384100.1	8.59458691311768	8.56128597635029	8.63658684940377	8.52035217415446	8.39853239168679	8.4553206278043	8.62294647269143	8.58189967325944	8.547388225334	8.54921283690292	8.60897152931237	8.52493879474351
TraesCS1B01G384400.1	6.34444482924813	6.86797841589777	6.66037400782166	7.56394942886434	7.13948489876283	7.32977838804439	7.14037633403957	7.32542883068278	6.98124135839503	7.30935174252446	7.10221079547343	6.92234141295145
TraesCS1B01G386200.1	10.2675054502771	10.3064825946974	10.2511605299422	10.3872469352435	10.3636022380415	10.3668585396539	10.3195467944987	10.5089664457771	10.3698620496236	10.4495971517597	10.2820439209852	10.518743066937
TraesCS1B01G386600.1	10.266469658259	10.3044538118407	10.2500300046942	10.3860350094997	10.3623319762458	10.3650484441458	10.3181040032547	10.5081298856905	10.3684738227649	10.4478979501	10.2806080911579	10.5179149063347
TraesCS1B01G386900.1	7.59727354679144	7.72928222342319	7.68465832883287	7.20276638016058	7.61570718975976	7.79631584133615	7.69060728056136	6.69152277716467	7.76962863722045	7.84062798313306	7.83935790435539	6.4184683781559
TraesCS1B01G388000.1	9.32848684898695	9.26848368499606	9.29300792829997	9.30971340881311	9.20454059749567	9.12914100887872	9.1569810483071	9.29400734700033	9.20099034802689	9.15314574862389	9.12238044164062	9.31457825051759
TraesCS1B01G388500.1	9.99727018982487	9.98108749955965	9.95884301641117	9.83746840457238	9.85106521713514	9.78601040446274	9.71094701299234	9.83315491230161	10.0225507347737	10.0065114337487	9.99900938100332	10.14113720366
TraesCS1B01G388700.1	9.28547482552957	9.36833959522436	9.30203938453233	9.23831766515863	9.11609280609384	9.22043575254492	9.21216750890888	9.24936265568029	9.18993929315692	9.17236164227684	9.23932692361586	9.24491189963543
TraesCS1B01G388900.1	7.83154905012798	7.89586525314284	7.83424236088855	7.72859716822461	7.06157435801537	7.23884969154148	7.36703522335993	7.70016282359823	7.41294732858974	7.43407341125639	7.47964819354527	7.96597480902374
TraesCS1B01G389200.1	8.81724311304427	8.56077743519518	8.71537452686272	8.73987627854543	8.78083146216794	8.70910107816034	8.74638663402175	8.76487178566837	8.75443106092052	8.63584632878112	8.64644015103966	8.14918780654038
TraesCS1B01G391900.1	8.69556190507753	8.76490754609677	8.75276708168587	8.7400183582758	8.60702549710845	8.65505100595812	8.69051880515227	8.65693099863388	8.67961410874275	8.69435523363049	8.69642626219431	8.66725675635186
TraesCS1B01G393500.1	8.29314606403029	8.19673266743577	8.22180847987446	8.31174582867231	8.22406363688908	8.27117521657676	8.27287231831936	8.42575516736817	8.30054181694145	8.23920984658724	8.31390800128981	8.14131963302446
TraesCS1B01G398800.1	9.43706951051022	9.40742728078538	9.44349527452191	9.36938204230672	9.4437249424278	9.43459945915587	9.45226750063031	9.44332343036984	9.41458823968678	9.35362190769753	9.43749518600924	9.31937794065358
TraesCS1B01G400300.1	10.3955759999331	10.4379347168743	10.5391781879787	10.5064041163451	10.3797885972871	10.3031399003445	10.3842365390899	10.5491108746506	10.3762243386025	10.3538035374711	10.2906885180164	10.6228589892812
TraesCS1B01G404900.1	7.31762838007758	7.8435088834536	7.46023183860283	7.32275394394676	7.78348255547611	7.67319125507516	7.22668953336113	6.85969101658585	7.25347626518384	7.19062166233662	7.15318083881601	6.98055386265877
TraesCS1B01G405000.1	8.80764972135935	8.91143570310057	8.89377407550933	8.84040889026678	8.78492237431603	8.76478358812483	8.83911338560686	8.5901814810338	8.99169551189851	9.00191608897016	8.9543382984428	8.96581729738064
TraesCS1B01G405200.1	9.86737965125899	9.96021757137803	9.92904405456609	9.86979711065596	9.67570260450347	9.73276683923026	9.8020769534933	9.6212714793522	10.0402594232667	9.9408966435395	9.95917010538971	9.94751039786453
TraesCS1B01G405300.1	7.92247259209012	7.590166330053	7.76447647034019	7.8697286192184	7.81675768734994	7.73639045397267	7.76270723460355	7.87460756536014	7.96229031771134	8.17403866918078	8.08495793811056	8.22040308129149
TraesCS1B01G407300.1	8.46784539405438	8.42212744618986	8.43553425761811	8.40322960157257	8.47015798661857	8.41900410341541	8.43466926958014	8.58935463676056	8.39221533620628	8.33677399801534	8.37675808204937	8.4675911351223
TraesCS1B01G409200.1	8.05633942173371	8.40226357733873	8.19581340175605	8.69053829974932	8.22418640511544	8.44115609120588	8.26004727217389	8.72771477487445	7.91750949216997	8.03955653916989	7.80112864755637	8.75111880586703
TraesCS1B01G409200LC.1	8.49337380452105	8.46259766668915	8.52767357036709	8.44738622054309	8.4676684170766	8.48962367295309	8.42580394968026	8.5361369947029	8.54872142436029	8.49533845718683	8.52517633533858	8.4335977300954
TraesCS1B01G410300.1	8.00289268333948	7.63736193210156	7.40337632340882	7.56965240978169	8.18317282440234	7.88644262350396	7.91607008617312	7.25393406768675	8.00510626960927	7.48248460291557	7.43424793770494	7.40391726397682
TraesCS1B01G411200LC.1	9.19068958003569	9.06201037550982	9.10322536613823	8.87158180876211	8.95090148628271	8.89100999623292	8.77407962650437	8.81254843367606	9.1905277768027	9.19889587397604	9.20188920943459	9.02612569971644
TraesCS1B01G411700.3	9.35633437078083	9.32192280249512	9.31903127897369	9.28581770515083	9.35057032531409	9.3211383880288	9.34292145573191	9.36159932870294	9.28980559140065	9.28396080605155	9.28673415380327	9.23642623535779
TraesCS1B01G417000.1	8.05659629955041	8.0566641355091	8.03406066493874	8.09139093009679	7.93899760622305	7.86952371730479	7.96140219594133	8.21129797176257	8.07915017828675	8.10899568688485	8.14832648102098	8.23125387812083
TraesCS1B01G422200.1	7.41659029879252	7.4354590625689	7.51148962295333	6.66351800697717	7.23855714201231	7.36580550766723	7.47335142371688	6.55084880565643	7.41946936735998	7.38263727158898	7.39514355144219	7.34050184393056
TraesCS1B01G424400.1	8.79382890036725	8.61119425873662	8.70092472722793	8.56568176180155	8.68480776147924	8.67556440146288	8.66953995932506	8.59570157596391	8.58395045367292	8.6392328956709	8.58962475889694	8.54324126758728
TraesCS1B01G427900.1	8.97999246702267	8.63118930578571	8.69301735341927	9.04953919756075	9.24140496407569	9.25557193838318	9.14997333059211	9.1667248322489	9.25829934165728	9.13772071335205	9.18636031909831	9.07609393857851
TraesCS1B01G428800.1	8.33983095986323	8.21995393804074	8.25148274935557	8.23225641206632	8.3263665486467	8.3109489444332	8.25956871967584	8.44281364197543	8.35828279602207	8.43544797935852	8.43075562102582	8.43596869929808
TraesCS1B01G428900.1	8.59383315758404	8.4707085298025	8.586330893189	8.74389543470433	8.67397661882495	8.65482334167242	8.73581475767441	8.94633992654694	8.46358869175264	8.62961704316268	8.50483858792513	8.69381660760981
TraesCS1B01G431000.1	8.63247608982743	8.5774271304081	8.59989585622576	8.66218785890555	8.62433930661251	8.63736291839916	8.66082693510817	8.85885052216793	8.55682145108872	8.52521303123404	8.5850577670922	8.71576233921626
TraesCS1B01G432600.1	7.87497104398277	7.8654967503676	7.91121516286478	7.86135409587425	7.66610492835002	7.85698006164067	7.84569687766667	7.09359857436159	7.76936940444872	7.66266511818119	7.71266760934641	6.52189554705605
TraesCS1B01G433200.1	7.35153552972495	7.92762842249394	7.32177834101884	7.36035272009292	7.68539236219468	7.16453539237822	7.12931063635585	7.56489332204946	7.22079125742235	7.32856882724594	7.19477330111853	7.73584259666129
TraesCS1B01G433300.1	10.2288844225857	10.2506824839516	10.2476212589015	10.1789254922502	10.1381365329948	10.0848512574492	10.012144764521	10.1236468120086	10.2994222182276	10.2377927596435	10.2578195893469	10.4226815800158
TraesCS1B01G433400.1	7.94929415859973	7.97484975364865	7.9502343868313	7.70943089481956	7.75498533462913	7.77590437480837	7.82768620260364	7.5600242261538	7.89706526114376	7.89225072087568	7.9355263878014	7.51282176572784
TraesCS1B01G434000.1	9.58716606636881	9.63045417744911	9.67335290295958	9.67463786486618	9.591920515814	9.68543210268816	9.69105194685332	9.69598734244203	9.59663730078658	9.65801060620464	9.65277010864824	9.64264908828704
TraesCS1B01G434100.2	7.6209026406764	7.38353822298645	7.48937448238904	7.62218606312449	7.77602793770327	7.73399994257792	7.65164441070736	7.88802414597719	7.53208996089802	7.52955194390636	7.52651775171909	7.60369668421332
TraesCS1B01G437500.1	7.38165872435931	6.92471659561523	6.90989039971222	7.97964970284707	8.03205310351887	7.65734981086954	7.51938097359113	8.13887199722967	7.63377392809268	7.22830682406356	7.41676034190196	8.422995725131
TraesCS1B01G437600.1	8.4305056235718	8.4877569696479	8.48083511333667	8.38170415929895	8.32377309463873	8.30616934856021	8.39622203861859	8.44565103003583	8.50958332157003	8.4456817809343	8.54828364356577	8.6118443114363
TraesCS1B01G441500.1	8.70590153781574	8.60220459821802	8.69744981426521	8.81813063622419	8.70987155862358	8.73068091762416	8.75586150509261	8.90258248867401	8.71284116609784	8.65959478642453	8.71886310119901	8.90080847193477
TraesCS1B01G443200.1	9.61127391772652	9.61788190530722	9.6162941136898	9.61850229024935	9.60335407485605	9.58273678873849	9.59812160691279	9.61936395007458	9.61789737086008	9.55677374504342	9.59096570578882	9.60733246062173
TraesCS1B01G443700.1	8.31056494940371	8.20471854105918	8.29686473089178	8.14054716871102	8.41503428285828	8.24619349065893	8.25872207761274	8.04599244671025	8.08543531998724	8.10002477654683	8.10375359839479	7.71831939911585
TraesCS1B01G444900.1	8.41949819923554	8.65505462709836	8.42471050421584	8.29086032021664	8.4263610788312	8.67668109187924	8.52029148917622	8.69626190334685	8.18649769091179	8.28110779998473	8.14687913126322	8.7347154334151
TraesCS1B01G449700.2	9.41490196443377	9.39163694967844	9.47605690359944	9.48619567752909	9.44345742635234	9.37233296448276	9.39749370985158	9.41049428421504	9.33147673545837	9.33828424553053	9.46311806565445	9.44974073679894
TraesCS1B01G451100.1	9.31059718146022	9.32404435264889	9.29187395747183	9.28448795854927	9.13202192106036	9.1713483094611	9.0988213961981	9.25493691381774	9.40598036877264	9.45972456465542	9.32193850951349	9.53910749511452
TraesCS1B01G455900.1	7.87366014213312	7.94574351793834	7.9506038697008	7.82772552881502	8.03924433449813	8.13489481456038	8.01102790882127	8.06185072442529	7.99839215791125	8.0610828449802	7.96709285650812	7.90044421506693
TraesCS1B01G457600.1	8.45005356227312	8.34313882733392	8.42215081777154	8.39928569919992	8.06909103366455	7.9460882490632	8.05881226455371	8.20005636285915	8.42314330176977	8.41529905588213	8.45770688194805	8.40054171227673
TraesCS1B01G458700.1	8.55848847681098	8.39758206482606	8.45561408276809	8.54977155906371	8.49129687565668	8.49445298868992	8.50893223914635	8.36396804870609	8.62574536251556	8.64727360576883	8.59865305665558	8.55227623761298
TraesCS1B01G463400.1	8.43830329499074	8.22836468483931	8.39672098977105	8.20847830079706	8.34336980612379	8.40041771299307	8.27532112943244	8.17516330635348	8.47012860081399	8.39243394878652	8.32540174816044	8.12709401831122
TraesCS1B01G464800.1	8.45844835570516	8.01172290188929	8.07792651186399	7.956315590883	8.67725087180942	8.4612117398268	8.40636146011676	8.12248167348143	8.62423265057446	8.41194076340888	8.28661937910621	8.26512749962033
TraesCS1B01G466300.1	7.82291794312338	7.8318747252329	7.72380498432322	7.84054574481847	7.64800838341886	7.65426937072293	7.70743258341335	7.52316204312555	7.17721564587512	7.53710398594563	7.42802212782695	7.16161980428701
TraesCS1B01G468300.1	7.64978256217831	7.28465822801551	7.49318005748754	7.14010841376636	9.59445497126425	9.76773012714522	9.70799991873386	9.87369043948256	9.70619608375688	9.69241242132027	9.72480271400107	9.79361299846531
TraesCS1B01G472500.1	8.89350520805825	8.589841166244	8.8748937472631	8.69386985256564	8.68766056113226	8.61497848383311	8.57233107921676	8.7879180432876	8.59082313727932	8.52199162753261	8.53284015308932	8.65737535830782
TraesCS1B01G477600.1	8.52387368882803	8.49634686577981	8.60330967624432	8.57041195250378	8.44352196877745	8.47521922002493	8.51927002289522	8.41243294880163	8.58005712557293	8.0699733334957	8.60636468758699	8.92105571588298
TraesCS1B01G478800.1	9.55000970150832	9.53579488662921	9.54492068191521	9.56721186652171	9.64180623265164	9.65146012179091	9.58083919006066	9.72021066564561	9.35055706886893	9.34878451781506	9.27343429585111	9.41416278161376
TraesCS1B01G513200LC.1	5.90553875778026	6.99206192348453	6.7377310555059	5.90553875778026	6.56158843787261	7.38451370895197	6.73921987646049	5.90553875778026	6.75144829953887	7.00444472989774	6.76523232345395	5.90553875778026
TraesCS1B01G570600LC.1	7.89137977590749	7.85521669629932	7.85621996973052	7.66202306303995	8.06924189471791	7.97615441031632	7.96807977203173	8.05150886628496	7.95494351015477	7.95384999686996	7.97108848177075	7.18214158407394
TraesCS1B01G598400LC.1	8.7034634639585	8.54729459061149	8.61876812338549	8.36231026752804	8.38026622215921	8.54375986845053	8.57196111611327	8.26058352003003	8.67646565248719	8.58397130478568	8.70029140798076	8.33612587148584
TraesCS1B01G613000LC.1	9.53525147016714	9.29038686201661	9.46555957836798	9.68981160710463	9.40331150826698	9.49294163157569	9.53139864160191	9.68257280302913	9.58348566872347	9.54037038449463	9.57976113408668	9.62124103449724
TraesCS1B01G627800LC.1	7.99645990850172	8.07337289541232	8.04361504695212	7.9503912123711	8.00888167067256	8.01887054383583	7.9961502177742	7.6733212889775	7.94667997277194	7.79916032199479	7.87000030554856	7.70630288421993
TraesCS1B01G627900LC.1	9.05776152500846	8.93354850233772	9.02658771856439	8.95294168266709	9.05257943041866	9.00073567689239	9.00580682497274	9.06554935190405	8.96931702025628	8.94863276013455	8.96674698708779	8.94937034965183
TraesCS1B01G643900LC.1	7.40954376341809	7.39602144507707	7.59538981445628	9.97392925746823	8.26329874378613	8.15898211919631	8.176723995105	10.1440972191924	8.22147787148164	8.24783788897092	8.26018571543134	10.1117507676539
TraesCS1B01G680300LC.1	9.72290298794556	9.67598367370157	9.75826645220716	9.6074529963244	9.53240498311441	9.47772815487363	9.55135824513689	9.5936383742406	9.67855586395881	9.72036092504906	9.71521540873983	9.7724647137296
TraesCS1B01G729100LC.1	8.81798211169281	8.90703283076815	8.86492842333294	8.62874813220519	8.95000373000959	8.95570742948994	8.9071155720962	8.68167649238347	8.90523904112257	8.9004900056702	8.90860522403639	8.61257583885565
TraesCS1B01G754600LC.1	8.62961093906615	8.61570550084258	8.62141681414808	8.57335259358376	8.69314525082074	8.49982262767364	8.59492651069456	8.50512392294694	8.55500237041333	8.51855607711785	8.54280127396884	8.55685305481635
TraesCS1B01G772000LC.1	8.58226720184176	8.45765638146599	8.50457577045032	8.58150861321776	8.56167518147033	8.53804811817707	8.58066686963344	8.69359232984413	8.5705798248082	8.4730460837099	8.59875415737484	8.58995082087146
TraesCS1B01G772500LC.1	7.89127655325727	7.97079930991661	7.94241136147468	7.8279961448252	7.7904665255632	8.41486326725953	7.81897589846133	7.92802434340231	8.72466596120668	8.68660246322111	8.75158738666113	7.9871401391518
TraesCS1B01G791800LC.1	7.9124481861564	7.3519308005841	7.8578795516663	8.00985942295652	7.7777545842669	7.50694726169265	7.26655055367823	7.51764424579015	7.67050910402137	7.24398770371054	7.86723490300701	8.01522749640193
TraesCS1B01G793300LC.1	9.16961135052962	9.14664679677326	9.13819716374655	9.11812206084096	9.06525482547433	9.11793399072079	9.05027223435032	9.15113951877167	9.08594195309828	9.026819174093	9.09696167398286	9.0206950624674
TraesCS1D01G000200.1	7.04142862064952	6.49726178749289	5.68775447283642	7.50838165044143	7.99564576638567	6.93568983769966	6.88021220669421	5.68775447283642	5.68775447283642	6.84842310594537	6.93994504092875	7.31627111462613
TraesCS1D01G000700.1	8.12594579132257	8.19462099860981	8.21773820100905	6.50582569442242	7.6609106269166	8.19355488112487	8.07324901052501	5.77028070457302	8.07356671073176	8.09865894825153	8.09363172106665	6.61689649214742
TraesCS1D01G001200.1	6.59124474635092	7.04378204632029	6.80164205579371	7.28773579116676	6.23686255932326	6.39808499383785	6.83138084963009	7.41553658521891	6.49107645335939	6.60789334713243	6.55515268774264	7.29666487550749
TraesCS1D01G003900.3	8.16271586030888	8.14111186621354	8.12117655990087	8.00651889228006	8.28171083049843	8.1852372669459	8.22682722022155	8.01653021745646	8.19535210022163	8.10483511179477	8.13384282439768	7.90539449625318
TraesCS1D01G007700.1	6.76661161239242	8.28896926111553	7.21794396572094	8.53310198069447	8.29995402827193	8.29848482599456	8.31720850623809	8.66135647861773	8.28990183369488	8.02558016169368	8.26049641196496	8.84773089578079
TraesCS1D01G011700.3	8.94203048668376	8.75141518119122	8.83691137043153	8.59741783582808	8.81736318461664	8.85241106572568	8.79226059630883	8.7048025340129	8.85956216593294	8.86666611316589	8.89002210304093	8.60219932431344
TraesCS1D01G013400.1	8.85879191712282	8.61435476293087	8.62444822273198	8.52119324053115	8.89661270864567	8.55361072981867	8.53780934459606	8.2707635739741	8.63920734644749	8.37002716492272	8.46386285617776	8.08559971508388
TraesCS1D01G015100.1	5.81098022354027	5.81098022354027	5.81098022354027	5.81098022354027	7.70180616729913	7.1119108211529	6.52949704155323	6.79760314618199	5.81098022354027	6.72505914717509	6.44615703814844	6.95548702106621
TraesCS1D01G021600.1	7.46399623310767	7.5816387956832	7.4924185436718	7.35826117895457	7.45427168555091	7.44664758893228	7.49742610508343	7.30578926190828	7.66140169790567	7.65068523140303	7.50538470095136	7.43912573866248
TraesCS1D01G030600.1	8.53394008475239	8.71969853155799	8.63255806153268	8.59090500371091	8.47857837073913	8.59892696324048	8.55839626001804	8.49160946189373	8.55064590195296	8.64417037053372	8.57552925412078	8.47596173732385
TraesCS1D01G034700.1	7.86379422439473	8.00536939368841	7.98248189629847	8.19538506008677	7.90852858978768	7.947850636999	7.96139548555011	8.0113557479113	8.40442936777356	8.44792926828352	8.4048532997247	8.66610388409983
TraesCS1D01G037000.1	7.91227830729519	7.78870852172347	7.93861165625776	7.61752454810922	8.10661289322286	7.90468905695932	8.06658006529223	7.9948045387598	8.20096492394392	8.04885281171889	8.11611741675272	7.91534197955298
TraesCS1D01G039300.1	9.52998989285938	9.27618133981536	9.38479297577946	9.33712640079053	9.49711316298506	9.36602639522282	9.22762547345001	9.47137845930644	9.48773840509059	9.54033434665691	9.49495403289749	9.49507789588374
TraesCS1D01G041200.1	9.44347142021139	9.4518024256114	9.43917477051589	9.35695787432532	9.5060937518172	9.43668544861348	9.43995440851342	9.43872368745081	9.48426731845456	9.46298692856556	9.43388964974437	9.3849788604566
TraesCS1D01G046400.1	9.76193116036281	9.75220073072652	9.751884912337	9.76727379771755	9.59529540866446	9.58212223732055	9.58629806282393	9.71861491144416	9.61651845794565	9.6086759387613	9.56379488731187	9.70011359079497
TraesCS1D01G049200LC.1	9.30921194713475	9.28462663726203	9.29016641209726	9.40291823655164	9.21423225222018	9.40021266852973	9.34071000823895	9.40279358712362	9.33637181233104	9.47327095429827	9.42427695110719	9.44841127647329
TraesCS1D01G052500.1	8.20762793026506	7.8668887360947	7.83978061550977	8.03495361135279	8.4511297220333	7.98485582425239	7.76781610709004	7.51977322905354	8.46638625774254	8.10071411471608	7.97474198846541	8.02311886845933
TraesCS1D01G052900.1	8.03165925045792	8.06773038050301	8.04343057048977	7.37463328642987	7.83271657140527	8.04207094174977	7.98775241425138	7.72608912085233	8.01875554444418	8.02368676910195	8.17128520603504	7.72306228547096
TraesCS1D01G053500.1	7.98931028940182	8.13253391103077	8.04918316317153	7.96485782411609	7.97451385133995	8.02649101878282	8.027858269924	7.70871850700895	8.18372087856936	8.29505812729638	8.17669444560968	7.80059339745273
TraesCS1D01G060500.1	8.84586056420502	8.75626626138269	8.82862906076694	8.85451562003128	8.75468761729817	8.80154687657515	8.86865865571861	8.90141913559278	8.61660598971216	8.6448130867659	8.70398803878449	8.58911628018981
TraesCS1D01G063500.1	8.86063842581301	8.86525944327803	8.82649493933268	8.71502579550557	8.65333301901344	8.36287170831008	8.53910536819352	8.65851798237309	8.75606867898641	8.49244349949932	8.78638479741169	8.68402283726434
TraesCS1D01G066600.1	8.39299605279471	8.29026969231613	8.34141768078654	8.05496760912799	8.41927361919413	8.4820056834877	8.45551513910178	8.12930795184115	8.45202824448752	8.50789135320746	8.40876256841801	7.96790218731088
TraesCS1D01G067100.1	8.20522721948438	8.10110475984584	8.04674647178764	7.19322524772266	8.49663119333215	8.24857462795991	8.14936794976174	7.30309417637794	8.31967805460885	8.4383115886354	8.36817933943168	7.29044165992688
TraesCS1D01G067500.1	9.27455156612645	9.34623227493159	9.31328594730475	9.33321318551883	9.17396779811347	9.03484934948401	9.10035876191179	9.07611393359756	9.21502319127736	9.29166393112114	9.2270179284694	9.36679929180071
TraesCS1D01G074600.1	9.14401550017258	8.98709456330545	8.96884223377131	8.93073431748178	9.31050698593586	9.06863872506101	8.9583025663508	8.91152225638203	9.21324356147499	9.00223739851443	9.0264166701413	8.89245662638048
TraesCS1D01G074700.1	7.36860463676913	6.97031731198258	7.11290061021544	7.41813402498696	7.72700101305254	7.65547224764115	7.5923668793032	7.23623734068959	7.39949316844157	7.47212600726567	7.32056493944235	6.79253199819435
TraesCS1D01G077600.1	9.13902206976507	9.16743515914082	9.23358433787448	9.45263157366452	9.16090659084947	9.20150666832806	9.19220118602	9.33159650855697	9.09145879844191	9.19705654747307	9.13671577344176	9.34546952548847
TraesCS1D01G077700.2	8.15646908462715	8.10771382042836	8.15503007167003	8.19599971334701	8.13589281718576	8.18611951575213	8.24761002439279	8.22176597244716	8.16190903879791	8.17650903518782	8.16467877987552	8.30091452622088
TraesCS1D01G079800.1	8.9812296328818	9.00335247206112	8.93276311710673	8.86324149672791	8.86098020210174	8.86145333816887	8.95108390597325	8.83971881152902	8.93376078872222	8.76457563859664	8.84699685189114	8.99204074193392
TraesCS1D01G081700.1	7.16027872543592	7.62202669760574	7.72074989277881	7.71479023447	6.74916228236878	6.78050526686018	6.69322200305765	7.6515783611803	6.88315650599337	7.16921485467412	7.22923688566719	7.64299986958582
TraesCS1D01G082800.1	7.34584929496807	7.79194404427971	7.59084187166924	7.04284869638472	7.03338635843136	7.22567748370456	7.59911315237118	6.79886974516363	6.89830993305602	7.25482169868365	7.21811701364464	6.78661707168973
TraesCS1D01G086700.1	9.3691007571873	9.24271613292136	9.2324493077339	9.29960576825345	9.45733532269552	9.2999392461546	9.25627850001527	9.27367256902413	9.38679372002058	9.29795163581011	9.35065164809551	9.22364400968136
TraesCS1D01G087600.1	8.27736876359346	8.19625168569527	8.28955954709495	8.35848280630428	8.00211954675479	8.27241966927728	8.02249009343468	8.13250559018287	7.9465952201383	7.8612263891106	8.00846547023143	8.06205628032269
TraesCS1D01G088300LC.1	9.22195270183522	8.81045448248185	9.10324318155031	9.35552041796675	8.95515914482753	8.88158028530751	8.91232755939322	9.32662251406997	9.22817851685491	9.25056497505973	9.19980660471449	9.76647292163897
TraesCS1D01G089200LC.1	8.10247582244356	8.14389472515895	8.09516013461957	7.98059967454846	8.08838600883975	7.82719892345557	7.905076250923	7.95561084003702	8.1548409668045	8.15047798843412	8.08329443598759	8.2918535325232
TraesCS1D01G090000.1	8.07268265015187	7.81714769713746	7.93165074341446	7.44070434646579	8.00865961293718	7.87367691242606	7.89440915624896	6.78443977621292	8.04942120546357	7.86055534955297	7.98137170145046	7.22056797863391
TraesCS1D01G090100.1	8.85311228224833	8.80468235712672	8.79229188779705	8.74979518318849	8.51105742231048	8.69581121670342	8.72290478593396	8.83153824085799	8.46500375641613	8.4870672353219	8.48011314814813	8.42365525799857
TraesCS1D01G091000.1	8.30247264230402	8.22122195623461	8.1942139244241	8.40164601766919	8.41460822531971	8.47077600251003	8.48771889035928	8.48618225672593	8.56324795811132	8.49775015311462	8.51535430441202	8.55923449993519
TraesCS1D01G094600.1	9.15431007384844	9.21619045397132	9.17151308190191	9.09736312753691	9.23688951453527	9.25953720999848	9.20287442468171	9.12491370245896	9.22139294580253	9.24951456224124	9.20997235656156	9.03373742483133
TraesCS1D01G094800.1	8.09850572067844	7.95188195574098	8.00749114252382	8.10438093121087	8.27369452901891	8.17276228017084	8.10401466871081	8.05919280157751	8.22637315468334	8.18973128003407	8.23271313918555	8.08928341459092
TraesCS1D01G098100.1	8.34774203964331	8.00419782523403	7.93850579583686	7.9697317238307	8.47712950806722	8.2445337275657	7.96744773691083	7.86943403543007	8.63753325415049	8.3247313163192	8.29765619331524	7.97158270599949
TraesCS1D01G098200LC.1	8.61407830395297	8.55844255642548	8.59713226544753	8.45312347032102	8.42732820317204	8.4427785016097	8.50290728686743	8.52677711408315	8.55142479966402	8.48484809019108	8.57656015914617	8.52516149245815
TraesCS1D01G101300.1	8.98502020979358	8.85035779304204	8.89455910462505	8.95920378308496	9.02737448886774	8.99221985966089	8.99105471269741	9.050137446511	9.00368463223222	9.03158796245137	9.01328514657561	8.95853240929301
TraesCS1D01G102400.1	8.61614713375526	8.56565278518052	8.5382591544142	8.45944156792212	8.53166240983804	8.51489897540872	8.59238435627522	8.53861952242724	8.55269685336681	8.61389906003733	8.58970433154158	8.52616954547746
TraesCS1D01G104800.2	8.71998694778856	8.66846142094575	8.70181341497934	8.64218639200077	8.7676075840306	8.66276966472549	8.69856622794854	8.71161283168352	8.77072021649029	8.73592354623649	8.77737064481115	8.67900793888342
TraesCS1D01G105200.2	9.36890757988618	9.22024045599869	9.37288638066903	9.08413504173144	9.21136498534933	9.20002901992923	9.34719183709585	9.11085148173653	9.4581549118228	9.49788272749315	9.52486482651064	9.35153082563173
TraesCS1D01G105500.2	9.23494739703263	9.01771251033943	9.08735298244415	9.38140296309005	9.52078584270917	9.48491584818412	9.42921924874059	9.49700927061309	9.49125324649687	9.47363832925602	9.49064270955811	9.24610284160835
TraesCS1D01G106200.1	9.48694395383137	9.47416081173282	9.4842821690074	9.45495239801816	9.45094164951714	9.52960455893115	9.57509823485474	9.48874083847052	9.53636606157389	9.49208171401043	9.55163180316187	9.43275161466974
TraesCS1D01G111300.2	8.9144531036602	8.91676392136221	8.92222637251326	8.84705163207137	8.93740622060633	8.9316255946128	8.95149499372006	8.86282689348815	8.92256497076679	8.93090209972129	8.89860012644184	8.82947585370901
TraesCS1D01G111600.1	7.90192663775004	7.962218890407	7.90746133459197	8.03022487603816	7.51584515074171	7.86142717809666	7.83190509888864	7.98975996333321	7.86410506035223	7.92343947745946	7.86966219291273	8.18355306997059
TraesCS1D01G121200.3	9.75484181446643	9.7720303388877	9.76772649850286	9.65597600071543	9.81409620653246	9.76943994052994	9.77700078847724	9.65384445862115	9.74984286256086	9.76045234894026	9.736425399923	9.57031611812525
TraesCS1D01G123400.2	9.55112989635787	9.4240702181349	9.45021499303207	9.7308911291558	9.71853771655185	9.64205945192722	9.48251031167814	9.43395860682181	9.5844806289886	9.50640270330674	9.46926005949758	9.93104958570758
TraesCS1D01G124600.2	8.49124718764569	8.64794136413977	8.54076102796637	8.43969852728906	8.66000063421578	8.49025101313132	8.49049491234021	8.50203784886009	8.52759406219205	8.50861848563125	8.42868945946602	8.43063466486648
TraesCS1D01G125300.1	9.1076507653013	9.07118154374766	9.11460372248665	9.00728574801211	9.01364328967216	9.04790045025694	9.07062730096979	9.05973110097752	9.06660376361619	9.07743560891412	9.08012778538694	8.99433119983482
TraesCS1D01G128800.1	9.29271135707373	9.20659211574785	9.26348092422882	9.28438799385571	9.37175581973061	9.34318321634869	9.25450600876807	9.26136965931759	9.31446635633156	9.33156105230132	9.31999271877749	9.10265756307824
TraesCS1D01G129500.2	7.57524778881528	7.59623510317527	7.59151084279478	8.84945660050372	7.56898824239713	7.48008504135247	7.49655195174127	8.81485657721745	7.67126200988082	7.7273346802677	7.64926803878835	9.09803443588751
TraesCS1D01G130500.1	8.08999382050859	8.05329895695271	8.14584076626349	8.33054516838573	8.16011713838361	8.2667783821789	8.25907122372564	8.30447144131317	8.41003798441046	8.47913170155732	8.37540252360066	8.57150856931576
TraesCS1D01G134600.1	8.27463960228279	8.15494234619591	8.21223127873377	8.04382338645182	8.29294222591581	8.12838218453894	8.19516894880354	8.10222386973059	8.24881771349556	8.23861530677908	8.27001439200472	8.04840380003398
TraesCS1D01G137400.1	9.81122824200999	9.72945534390871	9.58840802592543	9.78867710389517	9.79758663607615	9.78224246523631	9.62066056862081	9.90385077403912	9.78517145633494	9.79737728407408	9.63781890203895	9.86634125554582
TraesCS1D01G141800.1	8.6919482668958	8.50985900038362	8.70794361411654	8.60546163948424	8.75289370840684	8.71934342331399	8.70952790885903	8.65010082072759	8.7764115323281	8.76012321963985	8.70213657108459	8.43520513242786
TraesCS1D01G144000.1	9.53585055441049	9.51398546421357	9.49795011904161	9.57083610880862	9.5920390622775	9.60142483956196	9.6158387147984	9.58215970145335	9.59039774980996	9.66745837163901	9.61684417293463	9.55124387294176
TraesCS1D01G144100.1	8.24904573774138	8.13558076444422	8.20198884069631	8.25894588088129	8.24218195175947	8.17129852315691	8.2138864467096	8.1059475162	8.24090630551148	8.21073196009812	8.23941873016711	8.16932740905425
TraesCS1D01G144200.1	8.48958352139923	8.23001353903136	8.47064494978529	8.37785005878414	8.41364926285276	8.38592631104123	8.56459551574382	8.47981456144815	8.26193752960428	8.22327069026941	8.2525040774939	7.67531589157719
TraesCS1D01G144400.1	8.69409275399612	8.70744640410387	8.67261341284482	8.73175491942293	8.72063709250137	8.634520125164	8.64595667410098	8.57582157219633	8.61884128863955	8.62345796356344	8.6221273557441	8.51506416087175
TraesCS1D01G148000.1	7.97512222670986	7.85902128325454	7.92311547297086	7.95163719265858	8.0247237866645	8.00942804275177	7.96964009608289	8.00735778822619	8.05756079063251	8.01540968357181	8.04196889776195	8.06203260082401
TraesCS1D01G148500.1	7.18027833027802	7.11582522954558	7.10661487219926	5.33290758389782	6.91112140392453	7.08590070206652	7.22763167384433	5.33290758389782	7.35954475282839	7.31994659447163	7.39440524166325	5.33290758389782
TraesCS1D01G149400.1	8.95398595146627	8.98849563588096	8.89909569360728	8.83543033734392	8.99034719395027	8.88318349112042	8.8185798179444	8.82960031218012	8.92952786212279	8.85640792367925	8.92780599955415	8.72236572310132
TraesCS1D01G149800.1	7.5843125205253	7.41252086544609	7.48399464241985	7.87840036142075	6.71463683441083	6.90334218965518	7.19287007415545	7.60641717093947	7.78620104135227	7.75792707723614	7.77532971533278	8.71012653391271
TraesCS1D01G149900.1	8.7543412984225	8.73639768755927	8.76220971689657	8.54109376324768	8.75648053280909	8.73537785323518	8.73170542787967	8.71168321535019	8.83190880104717	8.85265495194501	8.82327055815086	8.54642527827474
TraesCS1D01G152300.1	8.41938976237946	8.39150210308391	8.41766652792461	8.45410292420894	8.4857111887137	8.50313745091658	8.54084179551197	8.44546895822116	8.45152076197147	8.43596115971967	8.45278100616953	8.43976248679928
TraesCS1D01G153900.1	10.2031570749465	10.1437888903481	10.1673071793493	10.1945260615636	10.1863545324587	10.1431439705298	10.1739502373861	10.2999414209219	10.1330492049363	10.0621683186642	10.1359108940176	10.2004104574488
TraesCS1D01G156400.2	9.31538398477408	9.2202963178145	9.17275773384775	9.24264210129945	9.24143935426688	9.22509747074925	9.24215411234768	9.32086061016821	9.24058221583972	9.31686530781442	9.25155434306501	9.35323214376051
TraesCS1D01G161000.1	8.98724143447649	9.01182853617889	8.99272152123271	9.09510289166228	8.99216596475554	9.00055011124962	9.03473642992153	8.88527353811815	9.0094163250561	9.075588702358	9.03323197220396	9.2100192906235
TraesCS1D01G161900.1	9.29444000893148	9.24433587582304	9.29335637849304	9.33077725144083	9.21426316564214	9.19201324214485	9.2770231415	9.33356946914631	9.24020192148881	9.14448081352578	9.28143527252637	9.27211715296474
TraesCS1D01G162200.1	7.57373379849533	7.60070262893129	7.68126823546292	7.71887958594748	7.66639627303586	7.4985048489701	7.76783915033419	7.77137704417037	7.4623059310665	7.71880092218727	7.61841526042037	8.08207826895172
TraesCS1D01G163900.1	7.96150418257494	7.91297712141477	7.85638030920442	6.97558181826384	8.03276848116488	8.0656540300929	7.96092868306738	7.46559056749203	7.99452710042849	8.14203023861298	8.1862970281029	7.39940376490059
TraesCS1D01G165400.1	8.82337430324506	8.73829541958137	8.74152811643228	8.75189581836324	8.87603613833722	8.7633464413911	8.69516195422172	8.80420343646768	8.72817685097862	8.73519471648592	8.73078979543153	8.76884199718481
TraesCS1D01G165500.1	8.43861597240763	8.39970816474857	8.36727540725811	8.10080042093884	8.35964922758365	8.40251483117097	8.39271595177989	8.54988142906164	8.52184546670595	8.50888632102592	8.52359004764938	8.59646014817959
TraesCS1D01G166100.1	7.81411272493201	7.75721461552786	7.83874628148522	7.85865308796772	7.71949933749105	7.63177164232194	7.65401693904496	6.8838796911899	7.85120852751769	8.22004802283959	7.77627322180495	8.06413128307268
TraesCS1D01G166900.1	8.80729377630901	8.81284709122146	8.82889765092311	8.73834394571887	8.80976992933606	8.82079557256708	8.82383875029206	8.69921779376082	9.01443963669321	8.97482537424286	9.0405751716569	8.69578669816099
TraesCS1D01G168300.4	8.69199907494852	8.73845677966659	8.76342537365947	8.57445873678557	8.58809762288741	8.56443192849985	8.68398364855186	8.50290515843647	8.67303678083	8.62995928734628	8.74720073318919	8.59236665933907
TraesCS1D01G168700.2	9.23481911222946	9.27712204086573	9.28589959245621	9.27301964416426	8.96216826381068	9.1212883352239	9.14608314540616	9.19859454554333	8.99843080087087	9.0299129189835	9.09090425605065	9.21132085657599
TraesCS1D01G169900.1	10.775878386274	10.9509591100969	10.8603593275997	11.0286799294886	10.7975789096348	10.5907559188859	10.6742520215987	10.7173081680061	10.9615927310431	10.8514146085682	10.913068753419	11.0058107348103
TraesCS1D01G170000.1	8.80788804786601	9.0646178158363	8.91507349129879	8.92424985667516	8.94969493723577	8.94751700822736	8.96852664417063	8.55909184942321	8.98896906179812	8.97818825941772	8.92986120349514	8.90954699528478
TraesCS1D01G174900.1	9.50202495480775	9.47277126429019	9.49816540212294	9.46307235727093	9.3567227216151	9.33623960591351	9.3887774238305	9.43877190069922	9.48217451186291	9.54374962271585	9.48278036519156	9.60364230601598
TraesCS1D01G175000.1	9.49903026885123	9.51119387818233	9.51311736880588	9.4912306953939	9.2483549349324	9.27755386043872	9.33733568815193	9.30094997472115	9.56855871820108	9.589906949741	9.60031328839282	9.64527511498185
TraesCS1D01G176800.1	8.88157667518802	8.84439713959861	8.88186219200516	8.91875231683087	8.9020417452655	8.89240711009359	8.90394044212105	8.91123917775601	8.88269205361773	8.88134895580449	8.88082199853567	8.90465909042594
TraesCS1D01G179700.1	8.15718453810522	7.34233756131181	7.7457627691043	8.0364251188382	8.27355398489009	8.28190909934247	8.22432068543122	7.96912745377886	8.35519332229787	8.30203490670066	8.3310954903183	8.231298349563
TraesCS1D01G180800.1	6.89246025595509	5.87724919356603	7.09773466173291	6.93340726322554	6.84164446072513	5.87724919356603	6.89109373687672	6.0781824166152	7.03257993106782	6.88699608376534	6.99152810901214	6.59894024951339
TraesCS1D01G181100.1	9.00810730097583	8.67010433361571	8.92580017168194	9.14254941096596	8.82475431774157	8.71837562104563	8.70937027157719	9.1377627577415	9.00232701702178	9.01076725528355	8.8921852511289	9.57785074915143
TraesCS1D01G181200.1	8.00610293365212	8.07923032715338	8.11258115057985	7.87362758671856	7.76833643145823	7.87449993025982	7.82980532519695	7.70779317132354	8.21147946523079	8.33572182800103	8.23643831917969	8.05825309204957
TraesCS1D01G181400.1	9.1125146666042	9.28034608975262	9.24918459205292	9.14444733672646	9.08024411840247	9.10043986193321	9.15294153031256	8.99081085073276	9.36906914568691	9.45859183158696	9.32999878695234	9.4855892437057
TraesCS1D01G181600.1	10.3766197867119	10.4204382547484	10.3992302317756	10.3798599028758	10.1786415487435	10.1985670957899	10.3112901178957	10.2423770373383	10.452526294902	10.5478609210645	10.4570894963295	10.5564879869766
TraesCS1D01G183200.1	8.6932496814993	8.73370920113986	8.80849279344878	8.71819942063271	8.6097478581473	8.67617657405389	8.57110455766528	8.62060505625298	8.90309914170893	8.89637529503342	8.8379363578766	8.89686985019397
TraesCS1D01G184000.1	8.78416622309688	8.41764395176672	8.48465108343608	8.54072490558045	8.69308739763652	8.73421028961686	8.81144932476238	8.53161957691815	8.82347932637455	8.86762541951399	8.87789378221115	8.96542081058324
TraesCS1D01G184600.1	7.94232708496307	7.63999626654434	7.99543573643082	7.88423213339257	7.94388188138145	7.92524885086826	8.09899013832488	7.74245554939509	8.14555235750803	8.10129774278064	8.17538308514255	7.74506895432515
TraesCS1D01G189600.1	7.34165513450803	5.82502197627967	6.7906742932448	7.24746721998181	6.85556603570367	6.5305315325334	5.68961642258572	7.04461069154536	7.06219490199853	6.49175964395739	6.66657788183114	7.34418840249936
TraesCS1D01G190000.1	7.929839844749	7.41962673312992	7.50184457199014	7.11221730988844	8.09667525407307	7.97007759331484	7.67087994056682	6.73766659635247	8.08961806162642	7.78938920099323	7.77045127158906	6.16220171741827
TraesCS1D01G191100.1	8.72089783686522	8.41919272533042	8.42410422469854	7.78609369549369	8.94177913762148	8.77524070447056	8.52715324108295	7.71505904835043	8.9259101054702	8.62114045825951	8.63241883505236	7.77937397454727
TraesCS1D01G191900.1	8.12630080937996	7.91644541270735	8.03702219827822	7.66018306528219	8.14829132164436	8.12821767703384	8.07575497040924	7.7287266837374	8.24415053966776	8.12426399521387	8.09494970165535	7.6370120339299
TraesCS1D01G193400.1	10.133203398841	10.1205152159703	10.1198522233998	10.0154235937555	9.96108171038639	9.84829955127819	9.97970946190217	9.93220746483152	10.1507051236242	10.3062894078736	10.1798753667283	10.2221301373335
TraesCS1D01G194600.1	9.77777050766731	9.88022160992442	9.88986205230791	9.79739243187399	9.86803184228251	9.94252486511596	9.87546726290187	9.97690907646495	9.83133722360318	9.97666078258591	9.79860820481236	9.94947876235073
TraesCS1D01G195400.1	9.24121987263661	9.22291389252027	9.26071795861701	9.05422895289113	9.14280735034278	9.06283495248142	9.09453084159707	8.90580714738343	9.25644974988275	9.28245415823613	9.2642776755576	9.15589961107498
TraesCS1D01G199700.1	8.59824349333216	8.58406750693914	8.6022173615665	8.23215305054381	8.616373735448	8.46931354014907	8.73278978523599	8.4283148703441	8.78719494257082	8.88281138706392	8.85689639828053	8.1465022640053
TraesCS1D01G206100LC.1	8.05431575745427	7.85438268184793	7.90879984538638	7.76642507086833	7.7973350488794	7.53146349634169	7.64655631742781	7.55726383529469	8.03594164188224	7.86141214838463	8.04551385561903	7.61709608517465
TraesCS1D01G207100.3	9.79187878251198	9.70873947702132	9.7324786123624	9.61419674419001	9.62473266196353	9.44251651028696	9.4171821167548	9.52485687972519	9.7598907673947	9.81185849492872	9.80186986260672	9.62451328504868
TraesCS1D01G208500.1	8.86086083447379	8.80150907187606	8.83594704713854	8.79120501405294	8.83889930405208	8.94690675337016	8.92286281152058	8.90304182785865	8.82533625069144	8.8344167910636	8.87622958693869	8.95382772313401
TraesCS1D01G211500.1	8.2499702886488	8.47724736296092	8.196877418538	8.31265681281292	8.35039541405467	8.57491946229084	8.411514607677	8.55279895846825	8.15127390664187	8.20520160756171	8.12799673077131	8.81653454142172
TraesCS1D01G213500.1	8.64767994881334	8.67181386854419	8.65628708527774	8.73929383410287	8.67340114419387	8.58370951513206	8.63592116547602	8.46630725097264	8.61339844880174	8.59179840344347	8.63644524339003	8.53317609807379
TraesCS1D01G213900.2	8.17165208717028	8.12784953776452	8.1082705854755	7.89070867186872	8.17794481627417	8.20973411074164	8.26440682961638	7.86179076779823	8.10383840663803	7.98393642035795	8.1903567624975	7.7171630210329
TraesCS1D01G215100.2	8.27678173822776	8.21481387706089	8.33562591686205	7.9111402136495	8.17188010253898	8.11905666095546	8.21103701033628	7.81656321545022	8.01269625364333	7.89729020655389	8.05489358262371	7.59905311828803
TraesCS1D01G218700.1	8.51899392036888	8.52741041838972	8.49781488848632	8.97782148956693	8.54113991982825	8.56920881750449	8.62209582076937	9.03048999776441	8.50883754478394	8.49324073561721	8.51388202073452	9.29629883171438
TraesCS1D01G219000.1	9.64612366510058	9.56158717653329	9.63890297186325	9.76013623386519	9.7407775088951	9.71103009329074	9.69120900170186	9.80128846740529	9.55211429482923	9.63006030363075	9.67866048927822	9.76579495412742
TraesCS1D01G219700.1	8.9743466885691	8.81683059371409	8.89211171315455	9.06264991422294	8.17586550499903	8.20402973252155	8.27627937431247	9.1315402390465	8.16262255371065	8.22655720317184	8.23111480565783	8.99851390943625
TraesCS1D01G220400.1	9.56103713242185	9.48484389869224	9.501246014791	9.44041809117982	9.5588332889612	9.50424262947772	9.50775693789812	9.50306224332039	9.56852171724297	9.50200981748112	9.53211977098758	9.5549859829799
TraesCS1D01G222600.2	8.94044973632467	8.90017456969537	8.89756744628758	8.92623904257772	8.95680351911221	8.84118595684536	8.81779282152297	8.8762878444668	9.07079940648073	9.05902399942047	9.08993273251308	9.08210006181887
TraesCS1D01G228500LC.1	8.30148037002095	8.02590517483397	8.31793317399046	8.76967124212526	8.08600524378557	8.1128600625995	8.05208987325969	8.60507320901282	8.34054394882642	8.39547003748883	8.25762873978145	8.89071013066288
TraesCS1D01G228600.2	7.67569579489277	7.608415894912	7.63275524814146	7.78318773129879	7.74574109659208	7.63840129901222	7.61124141351558	8.25722223049309	7.53866372409047	7.43270770191871	7.5278262525645	8.04553754608684
TraesCS1D01G231000.1	8.60656132492436	8.54694206726987	8.55948550265033	8.31979407325838	8.61788223615781	8.63010361583596	8.6362233072303	8.40464336646315	8.61038398265779	8.60381548764386	8.57819020154643	8.32815667107929
TraesCS1D01G232800.1	7.73326186357875	7.62665392528626	7.70237077168654	7.07188638296615	7.79747612033967	7.74331141091193	7.83578853693241	5.85097993856946	7.60447741294478	6.6935738092162	7.68279940526276	5.85097993856946
TraesCS1D01G234700.1	8.32956494570709	8.16716531372899	8.16070143993327	7.53637571171998	8.52732411485215	8.32529936998891	8.18409553222625	7.20776853588059	8.36987618797357	8.33219480812891	8.39725604236799	8.53154430997549
TraesCS1D01G236500.1	9.23283644923368	8.95887618442431	9.26105376094839	9.24439806344712	8.94013032697467	9.20913254572631	9.21685287263659	9.27174571514825	9.25427962087906	9.26732654182577	9.27720216888136	9.35028585238588
TraesCS1D01G236800LC.1	8.51409981375544	8.40551959307739	8.42424348250619	6.38929611777741	8.4652407980675	8.4999259380583	8.50006208561604	6.42626660077293	8.48969492804807	8.40840137321197	8.45260053494216	6.38929611777741
TraesCS1D01G237800.3	8.03890911122524	8.09066463352243	8.02766083003889	7.4634489027238	7.93689817625856	7.87836842364019	7.92287415235075	7.32881461250473	7.78325700694066	7.8728736836946	7.94371334959781	7.22839576837409
TraesCS1D01G238900.1	8.69904737357415	8.24250367920884	8.25633906391239	7.66446458375107	8.88944311604526	8.45566724099587	8.17164136609686	7.29007140490343	8.62143942055611	8.20514649878947	8.27419044047363	7.42209320823437
TraesCS1D01G245900.2	9.55411964415118	9.49870471418149	9.44937534501769	9.4613748780697	9.50223371848178	9.4696224618164	9.51516521658361	9.53289296609886	9.62432651686396	9.53136921297877	9.56322699563385	9.53570833531482
TraesCS1D01G247900LC.1	7.59251134477938	6.76516838084839	7.50799672580913	7.66832992706484	7.17412618107354	7.2347512923278	7.04997701878803	7.88682000404622	7.05328046493572	7.135909247474	7.04746544196325	7.6230709918209
TraesCS1D01G249100.1	9.38066935442836	9.41623896024585	9.37745542401644	9.4141825148008	9.28214673805703	9.17469134903733	9.27288077901567	9.30639543628715	9.4207959693737	9.46609513783207	9.4559133264409	9.50221553750558
TraesCS1D01G252900.1	9.53357670936948	9.50324439326213	9.58678892331737	9.62239641650559	9.81508750617684	9.441039711302	9.49925489117344	9.32131859667848	9.57290238011415	9.67758078755481	9.58059365837827	9.4252856348323
TraesCS1D01G256600.2	7.52290660577344	7.22840229650769	7.37582524508631	7.42365178193572	7.60628481713356	7.44990418251403	7.37100091919753	7.47486276074169	7.60827492563989	7.45550894808447	7.46385909947249	7.35005400665196
TraesCS1D01G261000.1	9.25181553039631	9.24602969273333	9.27665211687611	9.26042014733775	9.25286097498905	9.24602444412683	9.26474771960115	9.28681474179796	9.24043323667572	9.24846624362911	9.28024439961779	9.21127530357154
TraesCS1D01G262400.1	8.90531093914486	8.961126443555	8.90054402125085	8.96961175912506	8.87730561553794	8.98560895291089	8.88208675261218	8.94615575554353	8.89133367280184	8.97000794688152	8.95739108898937	8.90303023183321
TraesCS1D01G265600.1	8.52919652002515	8.43509511880576	8.31945614521128	6.72995870441589	8.83749196917746	8.90374677609258	8.88414743379201	6.75818877861738	8.88402081758957	8.95347753860684	8.88516936659854	6.6246251405401
TraesCS1D01G266300.1	8.40921608344766	8.2441488307341	8.30711494048378	8.36058253418791	8.1279280359901	8.16241075055127	8.10454171711454	8.19645721763515	8.45353249294251	8.26760590419371	8.39316433949736	8.23722494386599
TraesCS1D01G266300LC.1	9.75791391780948	9.76354816324162	9.76795798655249	9.92096298358084	9.46449147955137	9.47929812731561	9.66695937763566	9.72215273126344	9.82846072115967	9.89791218274563	9.88477480183967	10.0750524659289
TraesCS1D01G267500LC.1	6.24727056349959	5.38879661717268	6.1369586626376	8.35998848419998	5.66765356720781	6.48162078149259	5.38879661717268	6.12744893917593	5.87749727348182	5.8477946248927	5.38879661717268	8.57090427761169
TraesCS1D01G268500.1	9.65453848288716	9.63514708007089	9.67562895766831	9.57845130917608	9.56417172883814	9.59412471887965	9.54499850855419	9.58401890059435	9.63708451836929	9.6374916569232	9.63974286464106	9.75386480743276
TraesCS1D01G268600.1	8.39561561228175	8.44609998298869	8.46324787765734	8.08119921085211	8.6287068083343	8.48032930432852	8.56268569247278	8.26499132878466	8.48697293073456	8.42340027489089	8.43831720027944	8.20357472371649
TraesCS1D01G269000.1	8.48430296056765	8.61312486232276	8.5603732353308	7.73653279635869	8.48785918164824	8.38638811744139	8.08086471836716	8.10838951861995	8.11040434041243	7.8952967243676	8.24141718884726	8.24840483066896
TraesCS1D01G270600.1	8.25325462085775	8.22906670037404	8.09334073958597	8.0658361265541	8.3387796486541	8.27804664664435	8.24737948954862	8.18700960151923	8.20162151692133	8.20448364972195	8.14543416834515	8.07851630219313
TraesCS1D01G274000.1	8.96482336617203	9.02617629580349	8.98761894388646	8.95989412984007	8.88735818832184	8.86037377820239	8.9548413784893	8.78221679224577	9.03372484523194	9.00576969721066	9.04511865181997	9.041436523758
TraesCS1D01G276700.1	8.46439491889508	8.44256381349338	8.3852383856376	8.60275547856049	8.31279861005711	8.55062295325592	8.54441131238865	8.6980663113579	8.52202624878355	8.52062072730125	8.60166115626315	8.71672205655112
TraesCS1D01G280700.2	8.99172456208721	8.74178351216438	8.89413816426302	8.94673944248744	8.94584460348459	8.90158560215064	8.95983995219482	9.03814575293476	8.91462290725241	8.97009378003417	8.83110012309342	8.93994810294818
TraesCS1D01G281200.1	8.10231406181458	8.08051736679106	8.06372017259715	8.0484568187955	8.09623133721045	8.11236437466269	8.06729657678175	8.22709277951152	8.11262187784227	8.10260795821785	8.1455638967029	8.13363641488702
TraesCS1D01G281800.1	9.14074317713169	9.01647037713886	9.05110628012324	9.08735215172417	9.11458167955578	9.07768965890317	9.03426903653843	9.17993321333278	9.07546308117722	9.07993694084331	9.06925049672358	9.14206573222484
TraesCS1D01G283700LC.1	8.44232810481466	8.72874625618354	8.5078644206877	8.04031906180843	8.8833460358052	8.21353641842859	8.62015479287812	8.02848568704353	8.67030813826971	8.63059073514997	8.39579612675813	8.28294441637911
TraesCS1D01G283900.1	8.56794819904099	8.38487979106975	8.44030592715085	8.34076909836127	8.78671443437616	8.632920627663	8.64164316574076	8.44638202161217	8.66358416997883	8.52920474454316	8.56584349912849	8.20421365032545
TraesCS1D01G284000.2	10.3366660186191	10.3236493360691	10.355294395148	10.3708479423302	10.3581898654706	10.3671583657371	10.361589820397	10.3483706484414	10.3687053019706	10.3284827531295	10.356802260868	10.2834127693105
TraesCS1D01G284100LC.1	11.1921702189804	11.3293661451375	11.2675983526322	11.226049342982	11.135827309082	10.9731403519052	11.1297175175231	10.8438146813422	11.0655941315807	10.988826345795	11.0139460233546	11.0554005896342
TraesCS1D01G284200LC.1	10.9830541175833	11.2012306243666	11.1103597470497	10.6895585694468	10.8969114364036	10.8799236733913	10.9540199594456	10.3970261119103	11.083926974325	11.1290580759215	11.0800428446351	10.701326168755
TraesCS1D01G284600LC.1	9.49501517855976	9.34093665038626	9.48840869578305	9.47059110140349	9.27152548165677	9.24116081433842	9.32099630620312	9.49788314645745	9.34319877705172	9.47283865680006	9.48150664304392	9.70600797056484
TraesCS1D01G285300LC.1	7.8091841886483	7.62826797704132	7.69948878738102	7.71877027956877	8.03510285178732	8.09590568646029	7.98165235866731	7.66535408460227	8.21568406822143	8.28589168051301	8.16379228627151	7.91127763509751
TraesCS1D01G287400.1	8.75345138474883	8.68306517392792	8.71562776305381	8.5576599072532	8.74811661695789	8.73680994180219	8.73606749561096	8.62186378638373	8.79996117993846	8.72924912696108	8.77068341706173	8.59927078554297
TraesCS1D01G292000LC.1	8.95898143772981	10.8310983252232	10.9361205325743	8.93074967223969	10.5980631149594	9.03106399706034	9.29339371665518	10.690218749989	9.28771268496705	9.15735922829713	8.98774499899298	8.91375381697991
TraesCS1D01G294200LC.1	8.30227109366635	7.9426425383665	8.10377018553424	8.18101195068565	8.4137120773576	8.27773018881363	8.08828387611531	8.20964411369376	8.38630774886727	8.14949368397486	8.18350439747269	8.34024684759956
TraesCS1D01G295600.1	7.97465570539389	7.83150305765588	7.79030817004314	8.28219872525963	7.83276622063321	7.95039979929803	7.85408540871852	8.30635244473954	8.09532283023792	8.23709985973527	8.10203831112458	8.52897839340223
TraesCS1D01G295900.1	8.75003602814522	8.63166074292584	8.73158294843445	8.51898403903723	8.66832397935838	8.61751684110712	8.66516392597021	8.67603379262265	8.6779924462973	8.67399726187595	8.6676245207886	8.67877185319004
TraesCS1D01G298400.2	8.92321614072482	8.8898169261693	8.901296496965	8.93324605877412	8.90853322477757	8.92604519096804	8.94211633554685	8.92457807044374	8.77431601586193	8.85645773934218	8.88465587525018	8.83273397423703
TraesCS1D01G301700.1	9.02218892941023	9.01712958771609	8.99858673463221	9.03579440436874	8.92350140016654	8.88697792173637	8.94323365658378	9.00920298933481	8.86301937702829	8.76183688392235	8.88663664433384	8.88532588440468
TraesCS1D01G303600.1	8.45834373755151	8.61409996920381	8.50880515280723	8.49692737427724	8.60179623381227	8.70103042331282	8.66249104905607	8.65183891675608	8.36761961243952	8.39681394257949	8.33123517191184	8.63199453824424
TraesCS1D01G305900.1	9.23950522750751	9.21378892138592	9.26862085208112	9.27581878914194	9.42976904192575	9.4849862730218	9.41558361580129	9.23979078005952	9.41806635515681	9.4541840963066	9.40759551055652	9.16385721162108
TraesCS1D01G306200.1	10.2097205570346	10.2323896141126	10.2248401892069	10.1575702227671	10.1196494277735	10.0759642185285	9.9942027034697	10.129039113322	10.2824533847674	10.2218347668723	10.2281768299517	10.4143774146707
TraesCS1D01G308200.1	6.18539469495116	7.33983911216867	7.05217774456926	5.82846632199196	7.41024658268413	7.41450326111698	7.34874760038504	6.41737849684327	7.21490707171709	7.10519317814447	7.14047400456001	6.28526459523699
TraesCS1D01G308300.1	8.43028759041448	8.40909867425879	8.46563154532437	8.41033486283926	8.33295956605644	8.2131684811101	8.25748808720658	8.14641577855883	8.39535266168692	8.41586430116075	8.49533730724239	8.18017998958389
TraesCS1D01G308400.1	8.5132077939753	8.44740051043942	8.49411359961115	8.61871589607357	8.25409623090948	8.17489712678888	8.15722752659565	8.00782374486624	8.38912927686524	8.42486456322388	8.47994880087571	8.06179571981496
TraesCS1D01G310300.1	7.99693006880245	7.8505450058278	8.03143961196049	8.20128860124748	7.10838864647665	7.71758910837658	7.62228593409658	8.16709199906558	7.95551632532486	8.20128108955317	8.17483814084517	8.46112394769017
TraesCS1D01G313800.2	10.1984957900072	10.2423077313843	10.2835900587178	10.2907401824258	10.1057187179644	10.0303687246791	10.0923506487015	10.1751450448113	10.1696583275423	10.2094625345418	10.1917087242069	10.3884085949844
TraesCS1D01G322400.3	8.9248307297741	8.86797754782102	8.90672414063766	8.7143357954021	8.91431993817519	8.88454844926222	8.92766052661769	8.76341059563251	8.95235688359258	8.9549770536765	8.93228780990766	8.81190722610851
TraesCS1D01G327200.1	8.19520821480155	8.153438521686	8.08029139001259	8.63249980706264	8.24019734383545	8.31272362560133	8.24245911829798	8.52450478204863	8.35783730891129	8.45886837939896	8.38103031360747	8.73927055916836
TraesCS1D01G329000.1	8.74682058710307	8.59455651961862	8.72890534306505	8.60412247813973	8.67488159145312	8.61501138088824	8.60092054724155	8.66694860062637	8.76038976812522	8.75123115191055	8.79493017570132	8.71556923513077
TraesCS1D01G329300.1	8.45575507295323	8.36285416136577	8.43457782131676	8.25862053753195	8.43590344410736	8.33323247881641	8.45925440834558	8.36043296967573	8.32597260375254	8.41431696428665	8.39078234635697	8.30776441687536
TraesCS1D01G333500.1	7.94156499360338	7.58612474120827	7.88577778842467	7.9859578262775	7.7238026376363	7.78357694892547	7.83874599930313	8.04510373204123	7.76438782498262	7.75600307297167	7.69671412283734	7.89174962297546
TraesCS1D01G342100.1	8.73767899917573	8.68887252855776	8.75781531802262	8.67773204646535	8.60373367158856	8.59069853275429	8.6669384363102	8.47973164822807	8.62696498914074	8.67296261166916	8.65471461882033	8.46581751147595
TraesCS1D01G343400.1	9.46086997527159	9.40810501959553	9.49098340420159	9.44281309272894	9.41579874484227	9.46360276568346	9.50768488045283	9.60117561615173	9.34404398050851	9.43532556133191	9.43875539928659	9.37574643786154
TraesCS1D01G344600.1	9.4744089244831	9.42761517657274	9.44613859680694	9.37206331584672	9.4771271976981	9.55080281941651	9.46915423745202	9.47808139508084	9.35543055492679	9.4216847006691	9.31970881566358	9.42787709520577
TraesCS1D01G344900.1	8.00618950336758	7.92396244791017	7.90287690250307	7.58335182830698	8.50249346011298	8.15190882242554	8.08963851525529	7.71585299665992	8.20196664167499	8.0191052719499	8.20852149230698	7.35454356210978
TraesCS1D01G346100.1	9.59035380833959	9.49924276661107	9.5653478363538	9.03503556382588	9.4458925918649	9.36844574972193	9.37508586117952	9.02324936128632	9.59493414037163	9.69099992487992	9.65533106200446	9.071377671222
TraesCS1D01G346200.1	8.66681588771643	8.58767887771283	8.6886548149956	8.73771598436446	8.70269646741431	8.7222170430272	8.75324267271281	8.67730644790656	8.79117023774928	8.69827772239477	8.76491085378277	8.63532917193395
TraesCS1D01G348900.2	8.53841843030452	8.47417037632485	8.54193666010973	8.41463443412202	8.3442806257544	8.42125199593377	8.4563689163919	8.36130141309516	8.59391223878686	8.5728610199818	8.52152359441554	8.48125679423358
TraesCS1D01G349700.1	8.4777189365755	8.29734827051387	8.42944051013104	8.55507260030831	8.53314032819603	8.47824602902747	8.49206221905354	8.48088786630076	8.37453845223614	8.37558669351633	8.40109616577112	8.45621649239706
TraesCS1D01G350000.1	8.47878069773858	8.33012339331563	8.36876908422963	7.55839051015238	8.44954052271821	8.44434650159892	8.39508137770944	7.71533868945082	8.42331905934143	8.41900516751451	8.4178506205858	7.50990484766281
TraesCS1D01G350100.1	8.44732644308933	8.31660264348781	8.34643205545625	7.37758772492152	8.48459463904658	8.41747612173024	8.3759875995811	7.49033541896025	8.535701602732	8.44519285266034	8.53530311340865	7.45835059568414
TraesCS1D01G350200.1	8.1353167211618	7.35412102166247	7.90425120804226	7.43146903874677	7.87536794359238	7.82411083474726	7.75764195850136	7.33310454570869	8.0678356044665	7.78167399101958	7.85685749918467	7.86251572885813
TraesCS1D01G350900.1	8.37449169555624	8.00229636940301	8.35081170038991	8.29844143377611	8.48120912191323	8.45838330471587	8.33449736300664	8.49763081883282	8.14535400925317	8.10783388789718	8.1197171262395	7.93770680960362
TraesCS1D01G352000.1	8.52575411546407	8.4770307245631	8.49549881048772	8.37786505748653	8.472282935719	8.43399088362833	8.30876617889056	8.25896953015814	8.70484993814286	8.60453974914187	8.70227672120025	8.26583207496402
TraesCS1D01G357000.1	7.70668916671143	7.73633085906725	7.7127619360881	6.4271167468273	7.76592915685499	7.83313332128581	7.71972100040893	7.80250591687751	7.22079773028849	7.38241513264201	7.08287560717868	7.61412863609058
TraesCS1D01G359500.1	8.77855853018036	8.67308880782424	8.70369602219929	8.79704617156466	8.77419819749384	8.78808097175877	8.78652812051586	8.94036709741867	8.8257226443476	8.83800197650637	8.82832821931329	9.01871382726609
TraesCS1D01G360700.1	8.3017889124706	8.48628059085301	8.23394053332336	8.27463626465938	8.25875923585147	8.35154816037114	8.24718540507661	8.17974655114892	8.22284206442408	8.19273027087602	8.19461370710709	8.10841370535609
TraesCS1D01G361400.1	9.41491037973269	9.23997276317092	9.30289462425252	9.29331610925736	9.41725714694283	9.45471230548311	9.52831731521015	9.31952844736753	9.49188009401657	9.41985592030864	9.49335626956892	9.4110819580466
TraesCS1D01G361600.1	7.35782862031128	7.39652063759088	7.41832839676532	7.4645596088288	7.48542993227387	7.41585657042135	7.37062476400216	8.08016286551134	7.48310501201483	7.52544215135105	7.51621748354001	8.23392461418754
TraesCS1D01G361800.3	8.03833864616363	7.90964743533467	8.02182880725946	8.20756996748127	7.84168315224603	7.91862024585388	7.88987414166236	8.36460513450813	7.87638987693856	8.00129732862938	7.95719424220012	8.27039618707751
TraesCS1D01G361900.1	9.47741016318897	9.44245449525793	9.45611614915598	9.44258867192486	9.48313703412013	9.39363458002725	9.41136620738842	9.55225394814568	9.41725374638475	9.41253693401281	9.43685322243708	9.53228759283577
TraesCS1D01G362100.1	8.29791319241057	8.22217771119507	8.30064630542386	8.49135540782169	7.95884799185089	7.93515762689872	7.95069012289668	8.16587710296337	8.35386509553828	8.43940556758045	8.47348530410334	8.47213546849867
TraesCS1D01G362200.1	8.33982408032697	8.25498583311762	8.37008185395203	8.28869441209945	8.01587764417872	8.00779454309453	8.04910303190181	7.86872355631256	8.35363269151112	8.38377569285033	8.47778949810211	8.21060943226172
TraesCS1D01G362700.1	9.66529817553124	9.610798964972	9.64352062184763	9.5888783068976	9.60286089857446	9.60578051840444	9.64192284118606	9.65948589096038	9.69710915473373	9.66766890032802	9.70109876144201	9.64307959801697
TraesCS1D01G364700.1	8.76775215404198	8.72458725975688	8.7596858391254	8.5725569787331	8.75213948034358	8.7415167444947	8.72632872710752	8.74111049234041	8.83315951149872	8.87092431858331	8.82261349334112	8.60028424426955
TraesCS1D01G365100.1	7.13431871477094	7.49585714213159	8.15116301824023	8.55181123304419	7.54308427172167	7.22160415329605	7.52852939318985	7.97794594191876	7.66466864733138	7.50544290201177	7.70758281429116	7.89169082172681
TraesCS1D01G368700.1	9.05259945833113	9.16638179409774	9.10085498360405	9.1513724561553	9.16237382820788	9.12431984248069	9.08659584364458	9.21020523277172	9.14844529672411	9.20137891872066	9.1157655639655	9.22232231344138
TraesCS1D01G372000.1	8.58436952944814	8.58152034613577	8.62724061748682	8.52107420523816	8.40150589167186	8.47543930102484	8.62389710853753	8.58189967325944	8.50646539637201	8.54471222786958	8.59933779635664	8.53954302993049
TraesCS1D01G374100.1	7.58410221632028	7.6636196315917	7.6244398109342	7.51758208299992	7.60336237007961	7.74234384766974	7.64510843034708	7.47422869504976	7.83347527401105	7.79765517940178	7.81706461828111	7.86588128826457
TraesCS1D01G374700.1	7.82486742104427	7.64268397098695	7.57977609957329	7.91422277001446	7.82369805428867	7.70193805368852	7.80083067805498	8.15966344391368	7.67068306355	7.81249109703716	7.72052251854652	8.14919788737767
TraesCS1D01G375200.1	9.97282624604652	9.98502371911704	9.93928410790162	9.80813116045062	9.84884504797643	9.76861431922195	9.71464225475476	9.81073866505768	9.99785108772677	10.0101967691737	9.98906117112912	10.1128260067637
TraesCS1D01G375400.1	9.32954241602967	9.26953474433539	9.29368350479873	9.31041459674544	9.20551717564513	9.13098680053366	9.1569810483071	9.29559316580895	9.20134142733365	9.15350793319048	9.12340135153402	9.31653202952378
TraesCS1D01G375700.1	9.27913085953372	9.36300333979174	9.30038302226182	9.21809124415772	9.11538446835456	9.23007361211986	9.2196761352499	9.24592454463481	9.19233309636311	9.17582466074794	9.24478902018436	9.23907017421675
TraesCS1D01G378600.1	8.94840377019239	8.96456966948095	8.96755469188146	9.00499166403916	8.8699974969381	8.88590033144844	8.91695409549306	8.92737255806901	8.92593454766921	8.89218145889507	8.94155013185089	9.01403732508332
TraesCS1D01G386800.1	7.96873253811381	8.02778327334488	7.96386458337252	7.59915911216601	8.03578390466405	7.89642281291971	7.92010759980676	7.61022916388146	7.94195072207797	7.8737916584858	7.9835499002476	7.68721127242807
TraesCS1D01G390900.1	8.3118228727426	8.60106688336458	8.44923393610706	8.23750040171219	8.40337578124775	8.59528463314482	8.49797263184431	8.555872396729	8.13291432300729	8.20058352884327	8.07855968539665	8.6816663365524
TraesCS1D01G395700.1	7.89365749938208	7.7469230171755	7.79463646671142	7.97089664563621	8.17153334969383	8.17335574550282	8.20429482847192	8.26068185211996	8.03280208327753	8.09907775151081	8.07761451299864	8.18964560599651
TraesCS1D01G396100.1	8.88637210741085	8.81812583749008	8.88134555931479	8.94820230272276	8.29919709011858	8.93679937473298	8.84583596578805	8.72410954441527	8.78892715624431	8.8208322547504	8.77114349308227	8.91789115482747
TraesCS1D01G396600.1	10.2664738359996	10.3044528251478	10.2500789589743	10.386182479873	10.3622680828435	10.3649716645017	10.3179656715645	10.5080856393874	10.3683819316459	10.447765152779	10.2804614259192	10.5178555031245
TraesCS1D01G403100.1	7.43688701408484	6.87004500513191	6.40035604277409	6.86063410182908	7.92452638125257	7.37594496487501	7.1116074843477	6.63962600808341	7.41792566231624	6.78523434439375	6.68877551564832	6.42925452362801
TraesCS1D01G403300LC.1	8.55610366081079	8.02522729284881	7.75040056630108	8.0647807489994	8.19358280958098	8.34641147347513	8.12096747406842	8.18251604404238	8.32028103704254	8.23145639797035	8.46446607024823	8.00780057376788
TraesCS1D01G404700.1	8.63209918890555	8.65506963835454	8.64619892604821	8.78634858720556	8.47107883571496	8.48088755907749	8.61269927674773	8.8012052504143	8.56627336223043	8.68793458371306	8.65081053135713	9.02115729892368
TraesCS1D01G408100.1	8.39420716217452	8.48555842107713	8.41698577588674	8.30980927166332	8.46454439659103	8.44427808028014	8.37519666937201	8.43297321471028	8.28214737469859	8.46770171339362	8.25664625907507	8.27922967287443
TraesCS1D01G409400.1	8.70593107596618	8.73837575710862	8.69808009363708	8.28883375638776	8.74855150610362	8.68364163462003	8.70077064121163	8.31029162530803	8.63150042190571	8.63690075841448	8.62071319337207	8.29830452069124
TraesCS1D01G410800.1	9.11318803501081	9.08416753966193	9.11884449643757	9.25041180351171	9.0894391498849	9.1234359563984	9.18152486625927	9.30191779593801	9.06175044117908	9.08060904888023	9.05949964249099	9.19297979039714
TraesCS1D01G411300.1	10.2085342347991	10.251266280508	10.2349457970138	10.1364179456876	10.1306094635334	10.0769392420536	10.0106062241212	10.1030644935886	10.2835767402486	10.2318013789275	10.2371981981062	10.4011572400227
TraesCS1D01G411500.1	8.83874878447617	9.14175523602209	9.00889645775045	8.91863665029121	8.83624631141146	7.82516654287426	7.64189105272846	8.44504338915059	7.73719225982688	7.5293088151365	8.98139613933978	8.17196042048968
TraesCS1D01G412200.1	9.59531148756998	9.6361214986132	9.67968040196989	9.67928430104876	9.60011027231474	9.68860710745865	9.69686244790347	9.69968111751479	9.60321888398321	9.66327976657294	9.65920039368022	9.64661928487332
TraesCS1D01G412300.1	8.6835694291573	8.62186448148617	8.69441975598074	8.66757609675815	8.39709131967927	8.42423110640728	8.50024153802765	8.66919875541572	8.58458653490395	8.52714424695451	8.69203464202013	8.65057681450564
TraesCS1D01G419800.2	9.84671218609977	9.83357919045459	9.85100286404006	9.77072647703839	9.79845379982474	9.7732349679682	9.80155730513875	9.71278975965355	9.82334628621432	9.82726009991562	9.83512497156142	9.74971907955836
TraesCS1D01G422300.1	8.38074791609854	8.57896829798483	8.36144973120604	8.28063287564063	8.37753995089255	8.5815818691736	8.48756295032581	8.65732671623596	8.15178696091969	8.27111550041378	8.10645898735086	8.68473312297629
TraesCS1D01G424300.1	7.43425222614102	7.25748093388715	7.41325406579497	6.74964338059125	7.45276376848497	7.48476949470606	7.51933771246119	6.60793942837828	7.37035417589927	7.26045230186748	7.37557115610873	6.74102833371687
TraesCS1D01G429600.1	8.61503737709072	8.60666684915217	8.60765709012702	8.55497061587128	8.6750289006238	8.48445984588831	8.57645944835373	8.52693825015017	8.53936304110939	8.49327942669927	8.523280233739	8.59200770208099
TraesCS1D01G432400.1	7.79737343623263	7.72975892704318	7.79227956638659	7.49495614073946	7.87682743231718	7.92744813627154	7.80403256826628	7.56471399135284	7.90447688770134	8.01878066238562	7.93674619728497	7.7325427136095
TraesCS1D01G435600LC.1	5.86372804338053	7.41715952701523	6.11332069227062	7.66423258424639	7.55163482553396	7.12647841924769	7.23536329434559	7.01744887345825	7.14154041163185	6.73230306025911	7.02362198808788	5.86372804338053
TraesCS1D01G435700LC.1	8.14659343431135	8.09914926420024	8.12451943156684	8.26385566914714	8.30265677464013	8.11803222866971	8.11203444038739	8.29231269771557	8.21487903689439	8.23728732147679	8.24575261688582	8.29346759646602
TraesCS1D01G436300LC.1	7.90920493685409	7.09551890639786	7.96305850579832	8.12426996937247	7.96870974687228	7.93393823712813	7.94943956391608	8.15498072297325	7.93744812940722	8.10503497458093	7.9942910808557	8.08979575680225
TraesCS1D01G439500.1	9.11416327855411	8.87950893127441	9.04735422634926	8.15183709801828	9.00805057717588	8.83177380944008	8.90521611229437	8.2385514997218	9.15313953954191	9.08552432152624	9.1456959262414	8.3857252142126
TraesCS1D01G442400.1	8.47875673436233	8.37784106524651	8.42034963197451	8.49687772451116	8.46668495533432	8.56020047181173	8.49512348090441	8.59082926225524	8.31871087617897	8.39375196538338	8.34941510446677	8.45169017125428
TraesCS1D01G448800.1	7.01288725660723	7.43112864914413	7.49377702850021	7.6413151926013	7.53698309270931	7.71031374058161	7.26989354914768	7.55115309036287	7.1836172111665	7.63410041081842	7.68416783706193	7.71412665945112
TraesCS1D01G451900LC.1	8.58941061324504	8.48107720578915	8.52307592839143	8.64241008612979	8.6384481131548	8.37594903084593	8.37931503322775	8.62715351791628	8.48627549276432	8.47922877176489	8.51487638576917	8.54959044142887
TraesCS1D01G452300.1	9.55236821451041	9.5390046341581	9.54853988222618	9.57364813074994	9.64920978524567	9.65647374104554	9.59216195677202	9.72398486642719	9.35492810371258	9.34819599822507	9.27430831700807	9.41806824325656
TraesCS1D01G452500.1	9.49200466004168	9.21149412992745	9.39529543491051	9.51209504860325	9.43402580278931	9.37321750129789	9.42913621755804	9.56450942304762	9.45854010636864	9.39177121188083	9.46854750683297	9.48423832405089
TraesCS1D01G453600.1	8.82953873934385	8.80197897426511	8.82181725575157	8.7982044320869	8.45706184492251	8.33025585615871	8.38758690970263	8.41213250928283	8.44847061968303	8.42575882090247	8.34241791842897	8.49808345864709
TraesCS1D01G454400.2	8.98951576304157	8.99901325626302	8.97081782046341	8.94565991034181	9.00078473256855	9.04981814680268	8.9734380742993	9.10773317725337	9.04198099551707	8.97113320783547	9.07515287234675	8.98797584485609
TraesCS1D01G489300LC.1	9.87532466882273	9.96424092641534	9.99742739407746	9.91392182441975	9.7875140062919	9.70267030172832	9.77102118192297	9.46139472336676	9.94262322134791	9.87548395686613	9.95298778467414	9.33969985957559
TraesCS1D01G507900LC.1	10.5452314788601	10.5667328193978	10.6366839535154	10.6019231297212	10.5132746714354	10.4944564676008	10.5009253356876	10.6808689488828	10.5372009682	10.5300770638198	10.4911150587579	10.7332512519293
TraesCS1D01G578400LC.1	8.54782511790698	8.62738907508622	8.60740817676181	8.39531177043844	8.62882033650914	8.67491736004167	8.68213686880034	8.5793856271421	8.52702161476907	8.58884989732766	8.59087061738646	8.17944637899173
TraesCS1D01G581600LC.1	8.72397309447218	8.91539335354659	8.7200869910322	8.68276131975267	8.9675747993723	8.80896714135249	8.87673702035066	8.7318113382744	8.74920520032776	8.72819237157424	8.71832954924743	8.69357069855169
TraesCS1D01G589400LC.1	8.02209879441945	7.9428165324164	7.99466576534234	8.01042907552282	7.98542358574892	8.10196991697712	8.11594929133829	7.88618740267821	8.07055267150956	8.077083838055	8.12732758859398	8.48239645448493
TraesCS2A01G000600.1	7.51931376374782	7.56188454801792	7.48943437160415	7.19992175984739	7.85924797588653	7.80963849597573	7.7819122076927	7.26622981377881	7.68013624720013	7.43464577202976	7.66247905138953	6.49843397893283
TraesCS2A01G005200.1	7.57158496237942	7.49411324057524	7.59709435906624	7.47150366932774	7.61871900560562	7.58702538406919	7.70662138273421	7.63950611798784	7.49452945609838	7.43014786869684	7.48455027025729	7.61401808999909
TraesCS2A01G007300.1	8.12827770095435	8.07596475188937	8.12137265306682	7.69704529845282	8.19466230803195	8.17886473388669	8.05148270778568	7.73887738726916	8.17178939902509	8.24509808185205	8.17124713458455	7.80017439787291
TraesCS2A01G007800.1	7.57967694078973	7.60577228180843	7.63466214502373	7.40348274415569	7.49359289491858	7.59187233583605	7.61652977563948	7.65806768396873	7.60106211488308	7.56349970383406	7.62744591721098	7.08669041071993
TraesCS2A01G007900.1	8.02725183111143	7.66839042051526	8.04535165850612	8.51830262101616	8.1978926762805	8.04958878132445	8.00567397707198	8.41015383806113	8.0285386140279	7.97631379094477	8.01174228242639	8.10012230852833
TraesCS2A01G009400.2	8.34035348085294	8.1744370795649	8.34892523028719	8.28283607796522	8.03826551682408	8.02472534388178	8.00790064836761	8.32397780053899	8.09960489009875	8.08717532449092	8.13332284918845	8.30557451095948
TraesCS2A01G010100.1	9.16248013682313	9.15944916006107	9.1852052352276	9.07424206848521	9.01185763839811	9.04022858318616	9.08361610834844	8.93813351943819	9.04766581853413	9.03407780123741	9.14565581277649	8.99776066830329
TraesCS2A01G012200.1	8.8760091083272	8.73492024493739	8.80219905799832	8.86596092766907	8.91473688102601	8.8711560175202	8.86682487666229	8.85382322270039	8.86087150822904	8.87892031810452	8.85345826247131	8.79169011804211
TraesCS2A01G014300.1	8.03134843125513	8.12486551617073	8.03114426328475	7.8922265261221	8.03963111024545	8.12188566581565	8.0017961050761	7.95939749654691	8.14987491539827	8.24439555572996	8.10301071107576	8.13770321216522
TraesCS2A01G017100.1	8.00277554591823	7.91330729415585	7.76169115689792	7.77297456751965	7.90744391019336	7.79664379257828	7.98997724263875	7.89659322200436	7.67706456955405	7.67253000762047	7.68481747828957	7.50624232126183
TraesCS2A01G017500.1	8.48532758544127	8.38065210807434	8.46824076709431	8.48271245024024	8.40508089630268	8.43917581810015	8.4411581485781	8.56276069334661	8.35659771524313	8.35473662592367	8.37902380637936	8.4868296875962
TraesCS2A01G019400.2	7.36978096729882	5.7661032823442	6.64731907134874	5.7661032823442	5.93629820718975	5.7661032823442	5.7661032823442	5.7661032823442	5.7661032823442	5.7661032823442	5.7661032823442	5.7661032823442
TraesCS2A01G025700.1	8.07968490638604	8.19668847330093	8.09769165825878	7.99491250260305	8.01839242540935	7.98937292149514	8.06336928987451	7.97715673330554	7.68057796952322	7.62339440781309	7.76475350816463	8.02585109060885
TraesCS2A01G026600.1	8.90042514163592	8.61526441466509	8.67091080095575	8.67085826928891	9.00718299020302	8.61958254280559	8.60721391387036	8.30959485533149	8.68668917007233	8.40830756832712	8.45585711993191	8.09983249199903
TraesCS2A01G028000.1	7.95763411999034	7.52245002456787	7.85890149951417	7.43210075912009	8.41051233075075	8.08126900782552	8.2026870172521	7.65267709354254	8.18890398761074	7.99505218589399	8.15815784550004	7.38976622225304
TraesCS2A01G028700.1	7.96142781411056	6.98065643827101	7.22988600936047	5.55460463062004	7.78711775327393	7.20377187027485	7.15292723266323	5.98071649837236	7.82782025700794	7.49863012030884	7.39116928979673	7.05717496207008
TraesCS2A01G032500.1	9.22090545870308	9.2384237790897	9.26196331109717	9.12950801166389	9.11205526555887	9.044924796305	9.12303610292387	9.09206778329073	9.23283130497845	9.19191733185588	9.24473799270011	9.31711737285334
TraesCS2A01G032600.1	7.19863398503903	7.14808412223365	7.09794271898063	7.82576230947996	7.26595479004777	7.13148389675226	7.16763919624188	7.93107702027968	7.09260736082583	7.12472983616209	7.14961200079828	7.50570381854361
TraesCS2A01G033300.2	7.47004335642248	7.41125551722828	7.36868288309983	7.42510833194771	7.45364423057175	7.41136834113576	7.57650425137759	7.35941093208233	7.52138952682738	7.57254918117373	7.60988445034496	7.57043047536158
TraesCS2A01G033600.1	8.58875593924863	8.50706821150513	8.43926811789111	8.54829544576085	8.89651146804916	8.5223332548167	8.49960302670369	8.57367761981246	8.72691204856555	8.66107064324253	8.7330796313926	8.72843665223102
TraesCS2A01G034800.1	8.1051316611165	7.79709835048986	8.0425235200452	7.42750878368115	7.73111725369622	7.87489608212191	7.71772767974335	7.28592793902419	8.34867589981395	8.36034878607558	8.38584372056174	8.02735414209188
TraesCS2A01G035100.1	8.12058580616889	8.07753640900779	8.10742381070606	8.15193619743949	7.72665323971357	7.74099017756391	7.69659332208696	8.11257987377846	8.28550004661194	8.36878034037895	8.37459843898699	8.53713030641956
TraesCS2A01G036100.1	8.46577038606593	8.29492896176863	8.42724596209749	8.44574097397434	8.33301089446555	8.39937033150406	8.47790266381415	8.5675064108308	8.41868828987632	8.45330343275453	8.47859300880562	8.34536988670591
TraesCS2A01G037200.1	8.16899185012719	8.02070680238607	8.20957356824234	7.19722400679871	8.11275634320208	8.24638318407681	8.28246151553033	7.03902578070381	8.43278714222005	8.42965447620374	8.38466164778782	7.10405623860079
TraesCS2A01G037400.1	7.88824369090572	7.63046250684219	7.86580168085596	7.92820022187353	7.73045958237924	7.75713875817104	7.61938676445826	8.01937501218723	7.63257718199019	7.60193342249968	7.64146402282236	7.85074134433285
TraesCS2A01G037800.2	9.03454152005023	8.94632134085742	9.00348071139929	9.09905364599226	8.94706765179838	9.03699692774132	9.00620583373825	9.08726955037377	8.96509092411285	9.13871424625368	9.00708639627294	8.99413244170475
TraesCS2A01G040200.1	8.91612763414962	8.78118565071757	8.84688919743312	8.8352695120909	8.8296987530102	8.94825248658896	8.9720887263539	8.82810266480164	8.87300068235451	8.85149104098717	8.88498215519082	8.68991018597407
TraesCS2A01G041100.1	9.16680995289007	9.14602490990705	9.17138104788366	9.12774945143464	9.1509906030622	9.18512638453361	9.18044462444403	9.19465654196526	9.21008595246268	9.1512470342804	9.14495826585707	9.14593144163226
TraesCS2A01G041900.1	7.97703576349812	7.79182496800989	7.94757545021661	8.06205570580346	7.93179420533922	7.90662997550498	7.93514348060889	8.22371760757429	8.00560094097202	7.92461672108611	8.06350350548157	8.30031934758443
TraesCS2A01G042100.1	8.39775862826003	8.47929242955967	8.48534096848333	7.64168236347	8.36903087776268	8.43640422341103	8.35475906893449	7.93669069989287	8.18403416003605	8.20245486650006	8.25649104631381	7.88885583649552
TraesCS2A01G044600.1	7.47881638664516	7.19170781345779	7.39910967526745	7.54840972835113	6.76756947577358	6.4947370068492	6.32894453057497	7.25200456918745	6.67939834541868	6.68904229096465	6.50854050858814	7.01226414236114
TraesCS2A01G044900.1	7.93079071263209	7.79623571315861	7.84578727679442	7.57656935705461	8.02114886221781	6.37749442991626	7.96483376773334	6.43315844238221	5.81824670112737	5.97771936466041	5.66830306408295	7.6185598262551
TraesCS2A01G048600.1	8.15013804951481	8.14041065920293	8.01243590565956	8.44910515014274	8.54455568708329	8.28558011625941	8.13265817765577	7.11417017880263	8.2334296244817	7.99082202787981	8.15452467683432	7.82350140841972
TraesCS2A01G052900.1	7.2005690805027	7.16686327481613	7.60026804503595	7.24559737990203	7.47229380776924	7.46612048940559	7.37275708268498	6.00121184746695	6.14170764572718	6.54914174125284	6.59316611193673	6.00121184746695
TraesCS2A01G053200.1	6.00303638244613	6.94185403437564	6.18195144192534	5.63414454059313	5.56985881958603	5.56985881958603	5.56985881958603	5.90195553868294	5.56985881958603	7.15941974284589	5.86236810809484	5.56985881958603
TraesCS2A01G056500.1	7.56479587344831	7.4133506448423	7.30836207739597	7.11599424725613	7.68129426911189	7.400502680633	7.16821800489985	6.91590225639802	7.41360021189403	7.33135954437516	7.35813463784218	7.07894643838207
TraesCS2A01G060200.1	7.68264353892135	7.83142163076294	7.8020532810946	7.61045350494497	7.7717959655741	7.77248496786821	7.77865288355304	7.70334009395009	7.69610875798944	7.69885895857195	7.69364143166975	7.68564629374866
TraesCS2A01G061100.3	7.850865152115	7.73655068261357	7.82696610182883	7.73164538118667	7.81908061964341	7.88272315996269	7.85482082113898	7.43088216176143	7.79745271620009	7.84337249858137	7.82238200277379	7.83624210593233
TraesCS2A01G063500.1	7.59374164018748	8.06343378980721	7.62385296929152	7.31731395550233	8.12331606275548	7.41565471223706	7.50106393402022	8.04272626387412	7.57899595451332	7.59360149649734	7.46144117756906	7.9134586403169
TraesCS2A01G064700.2	8.10121779580078	7.85587281270328	8.02168580351175	8.17108237304284	8.14235510675218	8.10809235291904	8.12395347001424	8.31031090781829	8.05772555532009	8.13733559835668	8.09637931656624	8.08096677240643
TraesCS2A01G065000.1	8.62453855526051	8.55194786765457	8.56258683761649	8.48065931376596	8.4384823787104	8.46604059878491	8.50128791767325	8.53233036845095	8.58835102547951	8.55030637149012	8.57626419894153	8.30869142732373
TraesCS2A01G065100.4	7.32654894805742	7.40838879479206	7.17724552551918	7.00344842036212	7.20998538989708	7.2613569806066	7.35474334925273	6.24352097003687	7.31552500389824	7.23926734818733	7.31252966507535	6.80690692660264
TraesCS2A01G065700.1	8.47169818974635	8.23743706509067	8.47513622197611	8.54894281328733	8.44831861377847	8.44457043854823	8.51092022787267	8.61647967852417	8.31377345099985	8.43888713740676	8.32674947600683	8.62221894307461
TraesCS2A01G066200.1	9.26906214292196	8.94509382821069	9.02580318560771	9.46083250112087	9.62431407042644	9.60058018217303	9.51699278899899	9.51408750809848	9.5219827117749	9.58037713706946	9.57103580567601	9.32947777625183
TraesCS2A01G067700.1	7.97076008146126	7.77072469556382	7.97932435941791	7.76604408520939	8.03501089320065	8.03392922527508	8.03154089590509	7.90544050369657	8.140682908552	8.13289555081349	8.1858549699123	7.9170194264124
TraesCS2A01G067800.1	8.90469429785841	8.83397125795358	8.80404821431375	8.57681797164085	8.9136401193354	8.81796589379306	8.80354222050397	8.68078252534602	8.85005859190811	8.84823407292599	8.82222237817207	8.63328784549592
TraesCS2A01G069400.1	9.61705074294875	9.51189979988434	9.5808241640541	9.59204773954088	9.62518760807088	9.44739475575011	9.2349806966867	9.56287896083098	9.57941908609554	9.58464437083688	9.56595446825292	9.52265205951455
TraesCS2A01G069500.1	8.7283627067134	8.63810724444553	8.74717564346865	8.59092310703369	8.75801795680426	8.71551933631934	8.73906528790263	8.58619526290963	8.77789116821284	8.81605116912668	8.82385137821887	8.60427296764873
TraesCS2A01G070200.1	8.35706505719599	8.43702028933597	8.41035171966763	8.30266504224662	8.3282688378948	8.27634620634555	8.36155554785868	8.16330547907922	8.43402431353691	8.40049142365497	8.42396119927979	8.48197160586273
TraesCS2A01G070300.1	8.88057640217657	8.97533118199359	8.93304419963575	8.83732074556098	8.84773829698591	8.88991448354202	8.84326528461499	8.74983143546012	8.89388088078908	8.90844734504354	8.89377005846264	8.78561051457113
TraesCS2A01G072500.3	7.61636122434027	7.43594548699349	7.59141890683418	6.71592388131215	7.49305935969771	7.52919041349354	7.54242832015406	6.77747076800464	7.60567681695546	7.67730226931913	7.53765817603446	6.72244505854504
TraesCS2A01G074700.1	7.87957223922248	8.11776784932867	8.88974758568392	8.90003568112629	7.8302361476456	8.15652245957661	8.95925488805966	8.97415070447017	8.8324597840252	7.8027738992572	8.83879421856533	8.92654891833038
TraesCS2A01G075000.1	9.13905707047933	9.20864312088437	9.09817501882198	8.81154579608899	8.94504992786154	8.75424487559026	8.86230206258919	9.1889997497154	9.19502207633967	9.25453225366591	9.20504986043579	9.46636329057679
TraesCS2A01G075900LC.1	7.35888992769199	7.31453538078429	7.39492079144291	7.06219822453313	7.67634166291654	7.65799616162072	7.64839408747647	7.2423013593633	7.5120820510158	7.35860658280443	7.38790390083135	7.18505169655512
TraesCS2A01G076300.1	8.46844376545021	8.4285173847223	8.43495942487868	8.21202614131756	8.47420245866647	8.37567684468111	8.3536737514617	8.15779940517623	8.3830163923995	8.4605795730541	8.35648053403718	8.30687686274488
TraesCS2A01G076600.1	8.21657074482933	7.4996427220583	7.74980880968925	7.9942986414162	7.48382020396068	7.80488395188521	7.6813517196466	7.99667385670443	7.25275186881063	6.87525986665539	7.55425743153629	8.14427595901537
TraesCS2A01G076700.1	9.04400595029389	8.95618710717311	9.01763246275974	9.03839595747883	9.04855754275726	9.02245994558773	9.09592750789221	9.03856739936367	8.97135244127039	8.98057525982123	9.01606368009253	8.97912897802964
TraesCS2A01G076900.1	7.98623913278576	7.82840757500929	7.90956468586519	8.0181207066654	8.08650404966531	8.02974697510453	7.94519282958892	8.2140301440524	8.13028371874083	8.19501544449005	8.13574380389506	8.33002818091782
TraesCS2A01G078200.1	6.55292663682373	6.52019033511875	6.55500503911992	6.87355855495315	7.56029016830818	6.30316590221623	6.72245132914408	6.13017173998731	6.51150186611269	5.76384213925213	6.59736595389809	5.76384213925213
TraesCS2A01G079500.1	9.393851911795	9.32816757597621	9.33866114974358	9.3009466315087	9.47220348106606	9.37880856853967	9.38648826239087	9.39281034652431	9.40662337434403	9.40633307793486	9.38061300458457	9.27810934780326
TraesCS2A01G081100.1	8.20668179491036	8.17262995810915	8.24301351524239	7.8573922011488	7.85503912239395	7.66512914461956	7.80006410415445	7.35466247278447	7.96493725213536	8.04434198316994	7.92798720070415	7.13466185515359
TraesCS2A01G082100.1	10.1589127556434	10.0578064168644	10.0945905265792	10.104118597163	10.1472373603193	10.130929215562	10.1573724403848	10.2413648955561	10.1644411515372	10.151959949431	10.1207173235011	10.1348243000661
TraesCS2A01G082200.1	8.09045127782212	8.02332103801956	7.9865938454457	7.98445573433787	8.20831544869166	8.08131061363304	8.10144231035881	8.11786776221525	8.0870743807728	7.97809682253464	8.03589298826588	8.12059000370907
TraesCS2A01G083300.1	10.8637478911454	10.6750173626667	10.6134922795584	10.855737944455	10.8148706531878	10.605130289547	10.7597181427066	10.961702555056	10.8117997530577	10.6030920389191	10.7475254733965	10.788309403159
TraesCS2A01G086400.1	9.52358363331347	9.44931834294743	9.45204411175624	9.45878503629834	9.47191158453201	9.46704001532417	9.50471025520116	9.5783219024769	9.47148415435339	9.43364233458934	9.48761135188859	9.53569634738462
TraesCS2A01G087100LC.1	8.89036145335779	8.80468294425492	8.82455831722238	8.81508776727447	8.90697552573298	8.88918350248846	8.90360007117132	8.98973822782927	8.78274440732618	8.77228375537665	8.80509245786611	8.86524990675672
TraesCS2A01G088000.1	6.99742111983914	6.77083045064933	6.87808644955778	7.29388125576751	6.78099898548331	6.95956228295089	6.79019701926378	7.40401457011668	6.67850175407937	6.74085504647878	6.6127727537247	7.20554155000954
TraesCS2A01G088300.2	8.29383395879395	8.21252404706597	8.22148522244811	7.9146530561378	8.23300237358705	8.30680942549307	8.18273825297833	7.94030675962928	8.42484640711699	8.43793941754405	8.34727658725421	8.09849943376007
TraesCS2A01G088500.1	6.95587000327344	7.73658180127143	7.52812746016448	8.16782154054273	7.71176880347476	7.35806017323594	7.399816510709	8.06555334528783	7.46816717864211	7.46332097884119	7.89470575047314	8.3303111043559
TraesCS2A01G088900.3	9.19427567517974	9.1485280152056	9.18365516645861	8.97917872078556	9.22027579197488	9.171523394206	9.16759497233646	8.9308260027446	9.18843206818058	9.2547816224376	9.15510680370997	8.89666181967538
TraesCS2A01G089300.1	8.04887915767176	8.06420285939663	8.07500798197161	8.19230163160683	7.72483107167271	7.76397586282414	7.87479164192641	8.03521150284211	8.06198483769237	7.98220563220374	8.0809486682082	8.27080855912543
TraesCS2A01G090000.1	9.23477953494441	9.29866894529616	9.29950556206528	9.26537413201249	9.27431612027275	9.28717395421574	9.33004323212732	9.38686379058384	9.26229289974861	9.27253108066545	9.24865449630135	9.2075764288387
TraesCS2A01G092400.1	8.28067248223009	8.14688337547481	8.29492870559499	8.42409291027846	8.40986088177438	8.50194237142197	8.44442738190345	8.70549252030301	8.28414595454916	8.50624363576406	8.37432375655199	8.49276977724697
TraesCS2A01G092800.1	8.39624615766518	8.41633436087145	8.44426692015285	8.34307597249163	8.36266157999672	8.52549788542176	8.4710136772409	8.54864590041732	8.18577462278925	8.21182761925949	8.13192297243755	8.43835151428904
TraesCS2A01G094200.1	8.15412114551447	7.91168161644898	8.15016278580425	8.80115913042876	8.76943456149484	8.61887208961919	8.36785034297354	8.7117111732531	8.35581388448345	8.47062971352182	8.50901149863058	8.4870409940497
TraesCS2A01G095700.1	7.70700642708654	7.50448112713122	7.74775630787388	7.60219183281235	7.79998957564957	7.67624139482805	7.79366080679477	7.9194488688555	6.73351469116745	7.26790935085384	7.23410851007202	7.28107729589059
TraesCS2A01G097500.2	7.25679490258967	7.07516823636599	7.18266354464305	7.17037046173803	7.38163971278498	7.3142358112847	7.2628695688171	7.11136066844207	7.24024333429379	7.05315155894582	7.24079802893267	7.00680432381709
TraesCS2A01G097800.1	7.87227535262989	7.59874540866563	7.6295990273069	8.36897892340641	7.86946742095406	7.82387776842647	7.81066401870836	8.36421023106564	7.85190749351556	7.86003067640872	7.59402793833814	8.31309661264772
TraesCS2A01G098100.1	8.43266261155623	8.64837493004515	8.5431646166458	7.8121143725606	8.45969649078874	8.4545449114003	8.4926446254418	7.86884536209782	8.61008540613114	8.54525784921948	8.60436808413078	7.88810892852345
TraesCS2A01G098200.1	7.5081921943266	7.6439932713586	7.61452290986567	7.73938231536465	7.64382606050643	7.8172953990026	7.61077319775876	7.63052212035727	7.46300518614694	7.79706590375062	7.49863250081034	7.62610659055987
TraesCS2A01G098400.2	8.60796923294643	8.54551790569805	8.62686181799526	8.52265249269446	8.54775531203608	8.35312967984996	8.47256414326864	8.46473041161406	8.65121115562064	8.75066229964502	8.66839118408073	8.69809938043185
TraesCS2A01G099800.1	7.64890777195498	7.40260500074942	7.4039917673918	7.09791209643619	7.62064482765054	7.39859261644179	7.61730684258297	7.38595685011778	7.52102443816896	7.46685743988495	7.65310195718716	6.3942349683097
TraesCS2A01G101600.1	9.16688678361134	9.11467126077337	9.26716136214437	9.14975272099068	9.09693854251817	9.16536295843769	9.2069979532364	9.1190490669653	9.12710068862671	9.12294452444328	9.16189656773615	8.97513510609503
TraesCS2A01G101700.2	10.0276437701799	9.99190328634234	10.1005568540238	10.0407690987278	10.1245488136833	10.059719085425	10.0165861375816	10.0187467836216	9.92161796962237	9.90864475914318	9.93182837904474	9.75840365967976
TraesCS2A01G102100.2	8.06377290965429	7.91924802847778	8.32562700260751	8.15576378772105	8.27221795293708	8.28307347299723	8.31280791520926	8.26772648893949	8.36651086515912	7.92608565552032	8.33970660723551	8.2055382064145
TraesCS2A01G102400.1	8.05459811273209	7.7508362208893	8.00606753815289	7.77963958203074	7.93830759406961	7.92107587815651	7.87465993640245	7.78393484618908	7.89698089516117	7.97050561867571	7.93079032872494	7.73349296154365
TraesCS2A01G102500.1	8.62297175967144	8.71676248188938	8.66911074437836	8.73346549787449	8.56160847224336	8.66138738855058	8.5935990480511	8.61537247084977	8.74573917838735	8.76155922871192	8.76442528731524	8.72641313894757
TraesCS2A01G102600.1	8.07534497613446	7.94057815056435	8.023548748313	5.71748728828726	7.71572610393945	7.79825833546305	7.94442931357681	7.06925708936962	8.05750859986012	8.09468740507655	8.1629988062923	5.8550665825898
TraesCS2A01G105400.1	8.46578835912359	8.53671882713708	8.46818133605399	8.2308700297518	8.32586032117031	8.4845011704042	8.39375368265521	8.22332485582712	8.46497616900138	8.60894614862744	8.50123648458593	8.22034055914487
TraesCS2A01G105500.1	8.0810149351849	7.91387281559502	8.05262250030204	8.23543719673388	8.25868773381162	8.13079554640974	8.19682521586682	8.01668249868656	7.99077148181559	7.96795852433817	8.02466949491359	7.98309671737774
TraesCS2A01G105900.1	8.78133776426915	8.68549180203816	8.73834044801277	8.80666600200458	8.73150886334968	8.72075511430033	8.77219046194977	8.98516518295292	8.69923373198427	8.67045387301077	8.77627773475065	8.78552475643037
TraesCS2A01G107300.1	8.78785992902124	8.7739060439396	8.7436146998776	8.78382252088419	8.24453852832533	8.0100525754059	8.18471132703817	8.223734121507	8.61377587180599	8.5315864086244	8.58125000872068	8.55335059786792
TraesCS2A01G107500.1	7.76622562725499	7.37686739909161	7.68600414050814	7.63939224592928	7.51476747235161	7.26126633627293	7.47030957714932	7.70525458134305	8.18146996376045	7.73592270088832	7.49397974419984	7.28523236693746
TraesCS2A01G107600.1	8.60654633155388	8.57036159001492	8.53913222303994	8.28717506656141	8.69351092028573	8.53037307755588	8.72310850911483	8.20944836060985	8.97203018356556	8.68007711155079	8.73203440393086	8.5066661786372
TraesCS2A01G108400.1	8.6141349762036	8.56701582666998	8.54379787252532	8.43768513833803	8.40402862213132	8.19066797463509	8.29699034757655	8.01541510244546	8.75989631760925	8.55406982317107	8.57867230516485	8.51017354289078
TraesCS2A01G108700.1	8.77752825192073	8.74086726751704	8.73505013389526	8.64698542086927	8.52852834686877	8.32547751126925	8.41016344615282	8.40601666370618	8.88141981106839	8.71461958819036	8.74861563709	8.62469222828864
TraesCS2A01G108900.1	8.14947109279293	7.86669618679757	8.12750266090053	8.82362664680637	8.77899042857923	8.62364324394672	8.36785007262144	8.78644108396885	8.3383123777605	8.45741783767747	8.50285440129529	8.54914682314438
TraesCS2A01G109600.1	7.56106368269056	7.7566669865085	7.65400036051214	7.45542254337637	7.47816019352497	7.57208213299212	7.57881371674167	7.55846978218266	8.02563263615569	7.5972853065437	8.001278854469	6.7802008157888
TraesCS2A01G109700.1	8.60057441818752	8.54075780327911	8.55166904571567	8.63653586562064	8.51244098992114	8.4514746151321	8.46917129457328	8.43714974734496	8.56730351181755	8.56268574575138	8.52483811570121	8.55336368164126
TraesCS2A01G109900.1	9.16079030684277	8.94509385185526	9.03483255439152	9.32602171805588	9.44142100969872	9.39794082646776	9.33856751288686	9.41132439088818	9.40982152281559	9.3730427690671	9.394715232519	9.12594227631736
TraesCS2A01G110300.1	8.03986838439189	7.59200749845098	7.85325167242642	7.65512997370934	8.10701254364096	7.73089769853055	7.54813194594644	7.38214249492668	8.53469100998801	8.47900484742657	8.48347295642987	8.1211000514665
TraesCS2A01G111600.2	8.68704167372256	8.77049891352312	8.69435775359811	8.71151327684654	8.79577528700759	8.76988382266133	8.78386325802381	8.5145782133269	8.78011849022864	8.65170378987325	8.7634254003354	8.59568296795736
TraesCS2A01G112400.1	8.28384473435555	6.45856306968328	8.13394756300202	8.21474264936919	8.23430093542842	8.27505794509503	6.58879809477878	6.62225886943489	8.36917411992581	8.30982314603407	8.36519153898976	8.15078316838593
TraesCS2A01G112700.1	7.91322978539441	7.7914741844526	7.90996837690523	7.78447267413917	7.6256864374417	7.75818545492316	7.73211488633389	7.5176809297508	7.86033594792429	7.87072354373181	7.85574424392479	7.69682456019193
TraesCS2A01G113900.1	8.06496318426556	8.03652176922978	8.06047996539986	7.82030671893069	8.02753685291333	8.08694721816963	8.07877681966933	8.05208888458353	8.00633902994125	7.87389746493572	8.00640605020094	7.9539548882267
TraesCS2A01G114000.1	8.22492893477678	8.01414648411805	8.13155009515104	8.44421228173704	8.63578999187339	8.23350627155269	8.33092757169258	8.51553588629991	8.34681210192926	8.25190785254171	8.34968584490611	8.43453344669534
TraesCS2A01G114100.1	8.47702514501822	8.55987200654809	8.52419477663892	8.64085422007995	8.57411808774355	8.52516128989762	8.53641396086039	8.46855654008932	8.36574919070021	8.44719800053444	8.44241557328125	8.81801280419453
TraesCS2A01G114300.1	8.39373969188054	8.39881696246185	8.41866483127048	7.01310449904424	8.44983412986987	8.3463929320512	8.29757865303109	7.84680392341012	8.5112558282263	8.5125604891336	8.50897702597794	8.59946778406639
TraesCS2A01G114400.1	9.29844132497618	9.27210015363961	9.27700768898981	9.34130084874857	9.10262060042837	9.08333974315325	9.12048711806523	9.31021649209402	9.31104806224235	9.39942209237367	9.42633777520322	9.48236505611306
TraesCS2A01G114700LC.1	9.59000541138894	9.45720188783296	9.48894355507612	9.48791806457866	9.58710141923126	9.51432886336898	9.46081521497969	9.58080083722116	9.55131514293658	9.47859732049527	9.60006262365496	9.44851693954256
TraesCS2A01G115100.1	7.97523085261332	8.00223240840962	7.95672664867969	8.32758941129301	7.92310439228697	8.13809955782384	8.05550684070127	7.95813424637846	8.09457569476623	8.12080379603068	8.15340657649289	8.17386047726654
TraesCS2A01G117300.1	9.57552963170387	9.55669379545709	9.58092133902369	9.45670763558039	9.44908046030716	9.43768225582894	9.43524515876189	9.26760361224406	9.6046479386477	9.60422292835864	9.56543741453327	9.4680772576856
TraesCS2A01G120800.1	6.68445939954718	6.88187729822795	6.41155733533595	6.44108410980903	7.43830539395296	7.04124633413469	6.91188188787799	7.34905047871968	7.15810617523121	6.98757744949508	6.4973703308512	7.29611528490756
TraesCS2A01G121200.2	9.38048422279034	9.36432714423125	9.31448449671981	9.47526533181722	9.534489780156	9.46553479000341	9.47929164768039	9.51444721368794	9.46865291849536	9.42327109420635	9.4659940881534	9.47180897660733
TraesCS2A01G121800.1	8.41522906262289	8.33220523727762	8.39488881390874	8.84714024902285	8.25375215621027	7.78572592289153	8.21856640154238	8.97799694637977	8.47927797518739	8.38683241167936	8.52022467146724	9.22652883923418
TraesCS2A01G122100.1	8.44004797335671	8.48577400175025	8.50484462411439	8.55665224648571	8.24839444852499	8.21508055325782	8.21914751696549	8.12315836317246	8.29144336130955	8.19620455799165	8.16556156585633	8.39925491458105
TraesCS2A01G123000.1	8.64496008563624	8.49872980379684	8.61085587823863	8.59122381539317	8.1972919607029	8.3263063442834	8.35067662580918	8.49899280087488	8.50809550831725	8.42032826320263	8.49622143905035	8.50492193353359
TraesCS2A01G123800.1	9.15132004481067	9.17422440964921	9.20844698161268	9.07922278811548	9.17941233095835	9.28303058212131	9.19429460793146	9.1491766350176	9.12825801783013	9.17519678658447	9.08776703327257	9.15415845541282
TraesCS2A01G124200.1	8.53664170683585	8.45142779616347	8.47619123648704	8.20150668483315	8.49505313588555	8.42989386387319	8.4139704648614	8.00563599041364	8.56100473204418	8.47272400142899	8.50501122780523	8.30835770692869
TraesCS2A01G126700.2	8.59894960593301	8.72132942175581	8.66271179424045	8.25080712200586	8.51499070879922	8.58672356808163	8.56410483892468	8.16474759897759	8.65352858803394	8.64937643424653	8.62550102637003	8.51911183669214
TraesCS2A01G127200.3	8.58442191681594	8.57136310253547	8.5904937456978	8.19390047128502	8.62393950728838	8.52367928366385	8.60366087442349	7.97614339818609	8.6075578766292	8.73800552457842	8.61486847019135	7.98017615405058
TraesCS2A01G128600.1	7.45108758553546	7.02654211105198	7.3398274372702	7.77125292341063	8.15002111553705	7.48377314984588	7.62058009828951	7.8699851647512	7.12952421554358	6.88960721677251	6.84955576998294	7.87458312030202
TraesCS2A01G129600.3	8.43955089395861	8.47474739405741	8.4861151161915	8.36880283565333	8.30316727823738	8.35374749004665	8.38099681042359	8.37515442123582	8.38256525735204	8.36439135595011	8.37252507686284	8.47418790855191
TraesCS2A01G130900.1	9.46954194978326	9.32214917446143	9.40812373229329	9.47182640600468	8.81849794729558	9.06461906256697	9.12785121266127	9.3584907454166	9.33246057353262	9.30935652725561	9.44307502795039	9.38319935685894
TraesCS2A01G132200.2	9.12709579883582	9.04125695115938	9.1184067307276	9.43115273345831	8.96264883398696	9.12110302819873	9.16156386402811	9.37418101448347	9.26206743915534	9.30670709508467	9.32903799528561	9.54569357485678
TraesCS2A01G133700.1	8.56440855818756	8.53883188511695	8.58718230581242	8.63501446124426	8.51294843652985	8.55727840297779	8.59389032355974	8.61434999030787	8.45399472652573	8.49121199543605	8.44099495169866	8.47441262476448
TraesCS2A01G134000.1	7.81918066975276	7.83595799629381	7.84426694355226	7.5532693088111	7.74174964407059	7.84558623044668	7.81693967696334	7.4408786004693	7.80308773135335	7.81143776427993	7.82911945531418	7.99727545923255
TraesCS2A01G134300.1	7.90919586741077	7.80000677585225	7.92177605219946	7.79279730017972	7.75521538819351	7.71024916496063	7.76596465554773	7.65834461178223	7.71795168703279	7.77530062434448	7.7819161737143	7.59447886065145
TraesCS2A01G138300.1	8.43751941225753	8.26389419632026	8.17914504183211	8.48448864992473	8.30691079972829	8.33433262876561	8.381355657203	8.31915390846317	8.38121732370643	8.54116974385198	8.47266929471532	8.71365452264377
TraesCS2A01G138700.1	8.42181390021529	8.39152309211957	8.31522841273915	7.36272176621347	8.50830876622541	8.17775200158497	8.25772120789817	7.08670296501217	8.14003920093467	8.09541755766836	8.06836059819062	7.33127762820704
TraesCS2A01G142400.1	8.23601600104526	8.24309499570257	8.21924358517547	8.21253219789634	8.13037001916895	8.14278962516486	8.18853101926675	8.16656118996791	7.89218929542219	8.05772839356078	8.01856961063456	8.16195499988989
TraesCS2A01G143100.1	6.31737232353857	6.65051187501824	6.6581592858859	6.88733738557684	6.62999849633826	6.87783260926738	6.93234492596746	7.07454724570169	6.36768230372888	6.71885240676866	6.61875744713857	7.00246335399835
TraesCS2A01G144200.1	9.15130505957475	9.16281134178939	9.1037016809954	9.00200292196116	9.11722662320702	9.14924502254135	9.09309787642096	9.13150457005702	9.29148656824228	9.28281740619192	9.27377570042139	9.19364300548645
TraesCS2A01G145500.1	8.07431557610948	8.17468574123301	8.11420660636093	8.24956923208755	8.26045394936447	8.33410910541428	8.22855156297343	8.1947319673295	8.2091729542974	8.17401377044767	8.20537640625652	8.17917754302249
TraesCS2A01G145800.1	8.32063928157217	7.98384801665351	8.01108163037195	7.836464025672	8.61269327446326	8.30309813267144	8.0650964584405	8.06693113128712	8.41913347543804	8.08553871077495	8.20445836779131	7.96788934814408
TraesCS2A01G146000.1	8.17270196477924	8.20657402992583	8.16473107623447	8.36727684444975	8.1866959313974	8.38579936834726	8.2476207276673	8.4005798905988	8.21064460245067	8.28831859198239	8.31454067862093	8.40998540423284
TraesCS2A01G146800.1	8.8866741824805	8.83898536680292	8.85157177775505	8.83669053875605	8.844347767985	8.85749419899553	8.92615019105649	8.91214708273397	8.85118069273311	8.86201910935434	8.85487080333647	8.89494099731226
TraesCS2A01G147200.1	7.68940408699382	7.71386099593577	7.771964003024	7.62697563886601	7.79523766466221	7.84601058232915	7.76991449889012	7.72262763833379	7.75449196657182	7.75188653175911	7.71432533796507	7.51330442166611
TraesCS2A01G147400.1	8.81793369437551	8.7819166262916	8.78225883950701	8.61439093924422	8.8351170333934	8.86873215988705	8.84093428598892	8.60449410072399	8.85108885620565	8.8287598924686	8.82084189369541	8.49857520323718
TraesCS2A01G147500.1	8.32976269941756	8.20581317138747	8.30160779703377	8.30695184765402	8.31417223195417	8.2533355500836	8.29622124640023	8.38836889148518	8.19804274384843	8.24866132360665	8.30775905399785	8.21490366604793
TraesCS2A01G149300.1	8.166952933265	8.05526431114084	8.03853662520939	8.6830571261042	8.10358441913471	8.12206257272388	8.13133626129664	8.48692956130847	8.06669789990172	8.21273618762096	8.21293127885674	8.60823243908006
TraesCS2A01G151800.1	8.98558099686357	8.85088083958949	8.86101053517843	8.90393500721336	8.95631951400588	8.88244732356365	8.85027714120771	9.05183355401213	8.90499336951133	8.93505073910351	8.89340351642361	8.92792541813129
TraesCS2A01G154100.1	8.81220788130766	8.83263765795712	8.84544274959539	8.6161346276142	8.7198600052604	8.73257334142021	8.84340570158793	8.39238024147658	8.89838918736428	8.92313397305041	8.85970319191286	8.69465159327
TraesCS2A01G155500.1	7.5326780844664	7.65065143304149	7.66260432238486	7.62987533255182	7.76084206585483	7.66497026936284	7.73533754001783	7.13579055553346	7.69920954484919	7.55579139057837	7.6252061319182	7.18800365392189
TraesCS2A01G158300.1	8.64631492179092	8.33781577816356	8.49315065007027	8.35740960030281	8.55978855958401	8.58451216086174	8.58489344008307	8.5100263712225	8.54803316314463	8.55299854106478	8.58411801271948	8.67496014142741
TraesCS2A01G160500.1	8.15156321969914	8.13621286967687	8.11361892192815	8.17210766166141	8.15429203121284	8.07456526803064	8.12431253417198	8.13329171716977	8.03626324039981	8.03920098284986	8.03612105572052	8.12345178974259
TraesCS2A01G161300.1	8.76087781495747	8.59199124349136	8.67016654281102	8.50875192090152	8.67159959937254	8.61049141075591	8.64014550832831	8.57462288014775	8.58640626423848	8.64348390253473	8.64573246620519	8.44648409254193
TraesCS2A01G161700.1	7.39931622862263	7.37568282548517	7.2652882489276	7.35093220191343	7.73842126036693	7.49105156705908	7.65482400636625	7.58359790729242	7.56057033718986	7.24613802227939	7.4754774117717	7.22237516414557
TraesCS2A01G162700.3	7.19421591492714	7.09088368262051	7.20220534520377	6.61279738442961	7.60266821948107	7.18437583802635	7.4336334473442	7.21018553339859	7.28221726032058	7.53841486545719	7.56739992119972	6.81369078873626
TraesCS2A01G163000.1	7.87908391194909	7.66445369959563	7.72261501333143	7.79930311418797	7.93270005637869	7.82093391097129	7.8004918663924	7.91561094860274	7.64584735311733	7.48774361354001	7.66310451116354	7.7579892809465
TraesCS2A01G163100.1	8.05294823597823	7.74882592071557	8.03868593545239	8.033640010075	7.75072940592906	7.76105409989229	7.74960638223417	8.0126137850096	7.96611934006387	8.06000246525814	7.98393504410237	8.04811374109812
TraesCS2A01G163600.1	9.85287056321549	9.72863247758382	9.75510981912532	9.53965684925109	9.89816263745065	9.78091952938193	9.74259972465105	9.55767084972832	9.90730746124497	9.8074007647561	9.91012113263462	9.51158292908219
TraesCS2A01G163700.1	9.09181106658286	8.77522905792416	8.84217378759475	9.27353569509834	9.45328525100722	9.43595637483098	9.37136059633821	9.38945355398618	9.36895971157907	9.3770832616146	9.41445958596373	9.201613253719
TraesCS2A01G163800.1	8.71428035319244	8.81858241826439	8.84420894988207	8.2970174553778	8.81810306105389	8.79933678841722	8.82490600436374	8.54781169448372	8.64872008788958	8.82837780820879	8.79593128387297	8.50184031351471
TraesCS2A01G164000.1	8.32390494152521	8.11071791721406	8.15309613246107	8.49621958997006	8.27474297693537	8.20460508632918	8.22650609630359	8.53497018670195	8.39851327885611	8.23105066583365	8.30574873662158	8.5118138566468
TraesCS2A01G164600.1	8.67905806817371	8.59917035794856	8.64857146080278	8.40088969670819	8.66360326164399	8.52984410356279	8.57207750413109	8.28238186141365	8.73504914721116	8.73323236850787	8.78889850251098	8.88316547417357
TraesCS2A01G165100.1	7.51721480381514	7.50226357995262	7.5331044876244	7.29258508543556	7.42641692100197	7.07342835918873	7.45052763756544	7.42171103950573	7.09328573342727	7.13545469247306	7.12951280611065	7.35154419219339
TraesCS2A01G166800.2	7.24606831945197	7.1215886557295	7.2300396186818	5.97324802657444	7.27673947110865	7.29538410401249	7.23848514891	6.57216051085508	7.33034563733516	7.36465982884727	7.36394602957612	5.4769414494428
TraesCS2A01G167000LC.1	11.0916589510728	11.0027527030876	10.95986202973	10.9273767056868	10.895941313029	10.7007068803544	10.9206581630419	9.52659263443181	9.62977057746989	10.1940377663303	9.60952599171707	9.84250849153165
TraesCS2A01G168200.1	9.84198668774424	9.88521163322125	9.79887720843116	9.87014264780313	10.1527513498871	9.90058009757644	9.87614310244283	9.83716204941793	9.69281636094106	9.76874512193743	9.63051519059924	9.69023643564637
TraesCS2A01G168300.1	9.72993503976465	9.72551856073659	9.69626995672062	9.66011367809887	9.77584748125701	9.69220672764238	9.74099766315966	9.71200497420045	9.65489784301164	9.6310443355861	9.66208877048739	9.60278882347009
TraesCS2A01G168400.1	8.29071754076245	8.08813643803278	8.23733400547673	8.3943636847451	8.16066314089823	8.21880045662002	8.21090235509883	8.38957686331919	8.35545751769613	8.34242824869328	8.35138040962122	8.38407221371968
TraesCS2A01G168500.2	8.39899173254686	7.93140170748313	8.38481991229133	7.80818984574379	7.9388205775729	7.79606401500614	7.94451574812337	7.59253615618872	8.34579752690804	8.41847059540759	8.55694314530594	7.70280474086051
TraesCS2A01G168900.1	8.60939928035736	8.54417763986385	8.6100149345704	8.79779120721838	8.61859562666688	8.66658012616424	8.5685580602667	8.74947385325002	8.49710055553479	8.65062454820871	8.58631996499157	8.63630853637199
TraesCS2A01G169100.1	8.06389276344198	8.08069637333351	8.05054764723508	7.87588758436223	8.0055559961937	8.03875561571208	8.05939360340356	8.01985623189669	7.99934797513045	7.97788642346209	8.02471761226019	7.38393504940377
TraesCS2A01G169800.1	9.0540530742436	8.97778119259011	8.97301324309372	8.9613463160149	8.96993225274037	9.07919920026362	9.02198470995251	8.94238785228473	9.02922511394389	9.08349347576339	9.09329251174824	8.89507754190324
TraesCS2A01G170200.1	8.43049130589263	8.22879434101736	8.39365777786479	8.14170034159437	8.26787608514504	8.14956943329905	8.21036560816614	7.89238632962811	8.36711906952798	8.15591256534794	8.34845728224957	8.11256724013919
TraesCS2A01G170300.1	7.82327634067987	7.80920536410247	7.79046959128791	7.90339304432945	7.87850377738303	7.65584199820327	7.80239624241606	7.60863545066309	7.80356992810245	7.6471246102983	7.72485672374279	7.65691290512452
TraesCS2A01G170800.1	8.74632943732917	8.43796522281413	8.5158896729294	8.91440446388422	9.16100761689109	9.08522604824281	8.94948884510777	8.87822323568925	8.98642343196964	9.17134663154827	8.99777201306128	8.84623352952869
TraesCS2A01G171600.1	8.35864923632871	8.36920742172998	8.38928146265627	8.38449498790539	8.56116832679608	8.42465059963487	8.32249154183731	8.51023058529227	8.43245163208436	8.42015471920135	8.44500659640527	8.44289592324346
TraesCS2A01G171800.1	7.93052940173605	7.80235801074769	7.94284667396745	7.91296808848656	7.91339432326065	7.94988748797688	7.6873078094818	7.82642786376012	7.7023869035197	7.99746043165071	7.85218509775359	7.82064739005032
TraesCS2A01G172000.1	9.27187543529734	9.29040836059894	9.24368543774427	9.30837389740262	9.37564690560974	9.23059951276514	9.23462513492333	9.44562425639016	9.25403922050934	9.21239386775879	9.26159726916116	9.29761224050737
TraesCS2A01G172100.2	6.81597867977399	7.38043805290512	7.08738018471748	7.05425491180525	6.89695758151458	7.1663689138897	7.1533362501142	6.16534518705551	6.68085186383484	6.76145675398772	6.10253624785208	6.02460667125821
TraesCS2A01G172400.1	7.71739136240218	7.47096197430999	7.57214605088391	7.64845380861524	7.71949667988234	7.64970157371743	7.68725442869179	7.93534049594203	7.65994283493678	7.62824218621512	7.67611514148477	7.81503727672217
TraesCS2A01G172600.1	7.67523043197271	7.72345156005208	7.65436482359346	7.76743193469572	7.4387247087105	7.58177777752524	7.53742945103787	7.60703895344792	7.76083014252407	7.87311159361974	7.8218158054595	7.88071195984147
TraesCS2A01G172700.1	7.8419508802653	7.76129478363626	7.84092851350413	7.73644760285543	7.90374281543554	7.94789838285565	7.93359460970053	7.759504227788	7.96783779736816	7.99221544520881	7.92634362456279	7.66811320499898
TraesCS2A01G174700.1	8.07814675775881	8.01137529549465	8.05001684140273	8.05026926778115	8.05903252800082	8.03732364291385	8.07149666590414	8.09737923831062	8.05157212186449	7.99107281510906	8.06482210933208	8.03341100210458
TraesCS2A01G175500.1	7.27984456821247	6.86933466202456	7.10409755851683	8.02128500607734	7.40720569494993	7.50430498629961	7.28218208719122	7.70437535888325	7.34969028972888	7.07554047375045	7.1951577037118	7.98974764414662
TraesCS2A01G176100.1	7.54448889032298	7.62536519244736	7.71497025256862	7.86519623377976	7.61365589930954	7.66554089164103	7.70999130820031	7.77925167625759	7.5815674480793	7.6150376837371	7.60662871072728	7.42341601894803
TraesCS2A01G177000.1	8.29627021241186	8.14761587043079	8.1989485635615	8.14819158628623	8.42629363780248	8.31231220589896	8.34722837810111	8.31354477591772	8.26666686534562	8.29316804191061	8.31894564289613	8.20537725444329
TraesCS2A01G177100.1	8.78190338807428	8.74668611593008	8.76684384017159	8.28221966738093	8.5259481331127	8.55060696232703	8.65403099847367	8.37639535046637	8.8264494582521	8.78814709982161	8.83638249997824	8.44207724643406
TraesCS2A01G177700.1	7.80023777172183	7.72220302400368	7.7931718511671	7.71863118301489	7.81428300950061	7.79930981454598	7.80441308418193	7.87856702487568	7.82986628826372	7.76876481982486	7.84455153208956	7.66700883639195
TraesCS2A01G180200.1	8.39229372912842	8.34791975662646	8.33401008059768	8.17058973635901	8.4178146514338	8.21623702250191	8.20760663214656	8.2721834974683	8.41526897118087	8.15916416182191	8.2706023475702	8.14965998064163
TraesCS2A01G182500.1	8.9003825600651	8.74273611118981	8.84901604216021	9.03808326762483	8.6911112895204	8.7914395823009	8.82528187500351	9.09308290736296	8.92627196045721	8.94816576901504	8.94908961171479	9.20831125279854
TraesCS2A01G184000.1	8.65953984444324	8.49654553308887	8.56493578590153	8.95399645461975	8.82741163359295	8.83222800939315	8.78173566561947	9.02541813624967	8.81657858947695	8.72380207268184	8.79279730962971	8.92477189225542
TraesCS2A01G184400.2	7.86787695104171	7.71924526281222	7.73275756720887	7.24029201339828	7.84316280020535	7.67833813591911	7.83509676765887	7.33213022722278	7.6387229844131	7.65465274168603	7.71498045485992	7.59853059796885
TraesCS2A01G184500.1	9.0829242389679	8.94167634926831	9.00735595550518	9.2361245055373	8.9591333017651	8.941107351232	8.98637249442799	9.19650559239076	9.21927460346716	9.05632757745532	9.13859393694838	9.52119404297006
TraesCS2A01G184900.1	8.35847638053935	8.3579139194784	8.35833782188626	8.35979757604949	8.25739020670805	8.19492871728105	8.3424777913462	8.38651474362713	8.39259146040982	8.34614282378903	8.39741847063559	8.44067643258399
TraesCS2A01G185500.2	9.67707229884511	9.72042185292227	9.75078836504753	9.6572275817775	9.61174350135946	9.66528766298463	9.73738659280688	9.49715292239547	9.68982245039638	9.68018144374835	9.74208406974134	9.5086535715235
TraesCS2A01G185700.1	9.1885040808687	9.08188184116601	9.15156591639994	8.99797974366621	9.13675316509926	9.17438993419741	9.1449299361626	8.97319272477751	9.11677138006464	9.16575704000953	9.05832996629335	8.89446456057734
TraesCS2A01G187300.1	9.26732319396464	9.27256885526264	9.27671800846728	9.26712261494812	9.33563786044854	9.26803146882633	9.34810728626264	9.43142037740657	9.3141793638957	9.28271842550868	9.41552190221872	9.33797951670637
TraesCS2A01G188200.1	7.66253866733028	7.67682511835253	7.66021700355196	8.05615903721143	7.55918723861857	7.59091458232548	7.57148545622337	8.00813332499924	7.55461746034261	7.54489738113941	7.5864192023938	7.91907399356074
TraesCS2A01G189400.1	9.1158466032542	9.15367582651038	9.1139923329343	9.13351314654983	9.18717032624104	9.15929839763997	9.18744423833935	9.22530770995451	9.13539749959508	9.10201991436402	9.15842754319769	9.13490595115052
TraesCS2A01G190400.1	8.78007997815581	8.69875686071338	8.75945397364351	8.67584502272541	8.7326357099155	8.73953966713286	8.72853403975659	8.78274162935871	8.70765950576041	8.68779453096824	8.74656884094177	8.73822010290617
TraesCS2A01G190700.1	9.40375744681076	9.4305227919954	9.41618373401198	9.35470906526048	9.37718310762251	9.36282284550536	9.37166506324519	9.27071643685536	9.52580439153806	9.49593220704302	9.46139769967961	9.48938213070317
TraesCS2A01G190900.1	8.08798637199594	8.26704210273971	8.09266524002597	7.87952491080579	8.1985333559098	7.67776708701943	7.7520616242607	7.9640436953194	7.88917410494333	7.78376629034319	7.81705496716447	7.9648728918207
TraesCS2A01G191500.1	7.77689050664653	8.39832273454191	7.88231456439199	7.56328394808545	8.29962664705543	8.28777520494455	8.2715105777876	7.59271000231646	8.31580563135059	8.30578241273696	8.33198945252928	7.74422949250316
TraesCS2A01G192000.1	7.40945973073961	7.49256242152576	7.33094374921885	6.98832086712551	7.54075992881131	7.54062958457093	7.57282556229585	7.37880343621855	7.61677186160512	7.60704926592824	7.63032534314601	7.35773858747152
TraesCS2A01G192100.2	7.77318509623732	7.7899067033353	7.71295131848446	7.54884468352279	7.77369790981998	7.80147336490075	7.70504279922325	7.67788132390723	7.8650103172289	7.72485578150814	7.85195903174363	7.5928741170078
TraesCS2A01G192200.1	8.14557987697126	8.21876459870542	8.11025468212939	7.83790996044759	8.16134026826634	8.15304394955712	8.14116537322053	7.80640706571259	8.04527115017292	8.06395132970789	7.99034629027506	7.69436283684814
TraesCS2A01G192900.1	8.8726883094038	8.75314359890668	8.79997525262919	8.90901701373238	8.77165177968664	8.77150221977804	8.7873181121661	8.8520341290646	8.79609567210944	8.72696132913883	8.7797260622581	8.79921443572724
TraesCS2A01G197600.1	7.67112657602539	7.59418827792217	7.67912984692422	7.74148490597366	7.43726919738612	7.55580370907967	7.93734244350875	7.95515626844998	7.89407816435633	7.8947813239937	7.67995283915188	7.78544906967577
TraesCS2A01G197900.1	8.60094771366017	8.63034468043967	8.64867142382309	8.63874813104186	8.28218619889548	8.36261963428666	8.31788053353782	8.58547628205142	8.62518986944009	8.70303603861085	8.67328682584068	8.85717997908864
TraesCS2A01G198000.1	8.52983896079403	8.58630763695297	8.53964333942499	8.73854246180445	8.59980888954975	8.65385063074661	8.72685248302928	8.90710383215169	8.63276451198968	8.7263174859905	8.67568782526198	8.92239921039946
TraesCS2A01G198500.1	8.68028846127249	8.45682084988905	8.65369230982483	8.77879198834468	8.63074395533337	8.65551706820151	8.70130794403754	8.85356777666893	8.56010497656675	8.66853997417206	8.59586035373108	8.87708465241801
TraesCS2A01G199600.1	8.87894215671079	9.06534810854511	8.73919338036738	8.73520289155195	8.74575718604621	8.87155319790505	8.90593520411903	8.8296573778652	8.81922954130637	8.73972643978061	8.88446259373582	9.10926264546525
TraesCS2A01G202300.1	8.22856310304258	8.44361312497162	8.37873846286904	8.07355688079213	8.22776801566632	8.12969671517953	8.20105940578944	8.01819372750231	8.29374304565808	8.14170774291357	8.22279255228182	8.2400331573272
TraesCS2A01G202900.1	8.87638955527433	8.86474367402041	8.85129049241736	8.80264731064557	8.89109034209241	8.88347070114827	8.85330603889865	8.86122641752865	8.81520542560947	8.85243949265908	8.85447628499451	8.74803608869145
TraesCS2A01G203600.1	7.98425419730816	7.80723432701755	7.83729838053392	7.5934623959742	7.95647920787969	7.87107240782287	7.82034098749331	7.79708346753498	7.99652408465854	7.85789562415964	7.83208656333997	7.71166881452244
TraesCS2A01G206000.1	7.57562860835231	7.71943566397459	7.26488888237021	7.48336817350928	7.3224806785189	7.45223981563666	7.52857067432617	7.53531903018594	7.49162208960453	7.59623343137551	7.47838570829159	7.37115318483629
TraesCS2A01G206100.1	8.9144964075945	8.88293164869033	8.86423863736714	8.77394964192979	8.70333138563104	8.76591067796961	8.76168195356081	8.73474110285264	8.93124595467256	9.03791680685033	8.96793033116358	9.05597108708501
TraesCS2A01G206200.1	9.87517091047004	9.74736013095657	9.77746152862425	9.75572580986057	9.64762727469424	9.61055977342802	9.58975521490446	9.77035203045655	9.74697948680329	9.82915738660731	9.80787540457405	10.0751994593966
TraesCS2A01G207900.1	9.40988934943977	9.48810229413362	9.42650817218021	9.45606200070799	9.24014388145238	9.3100803815456	9.32963011042165	9.18171909349519	9.57317054234202	9.63326958423767	9.57532902170567	9.50782830636166
TraesCS2A01G209800.1	8.17173031233287	8.15493332124444	8.1681947673201	7.81589059452374	8.21018099336936	8.25665269284032	8.15630010201732	7.83488624534326	8.23414008899518	8.31101274362615	8.22591451737211	7.9102994249466
TraesCS2A01G211100.1	8.70303312569685	8.69090578975447	8.68643893288245	8.58132165517596	8.68655187399238	8.73698333197368	8.79366023501089	8.59939064894061	8.69344528029467	8.66132793286001	8.75406770706868	8.53946939144075
TraesCS2A01G211800.1	8.16596360912548	7.82847910326524	8.18727989845419	8.23406495536603	8.15628054251537	8.05532468765108	7.99280952416627	7.77888307861734	7.84697473396651	7.92645290944131	7.94386476178086	7.03105477643755
TraesCS2A01G211900.1	6.12570142484427	6.17722591553204	6.12570142484427	8.12515657711307	6.12570142484427	7.68223866211425	7.77053311909039	8.0582528424948	8.07326921048611	7.83967733486605	7.90863727708473	8.01289682121797
TraesCS2A01G212100.1	8.48502451188231	8.38134453256146	8.42503322904427	8.21041451438599	8.50573929039944	8.49536785069981	8.50725355761209	8.35859005396265	8.4915713243214	8.52719590513192	8.49728775252255	8.44777522160737
TraesCS2A01G214600.1	10.0629193711506	9.9258879620067	9.86909361981806	10.1817071259107	10.2349692113593	9.04340501721289	9.16499106040564	10.3391739750016	10.2302715049087	9.04646861931815	9.08705183936189	10.3467244359349
TraesCS2A01G214700.1	10.0533842249556	9.89774507759335	9.85071382980194	10.1747823257999	10.2296841624844	8.90839279385528	9.01712464128623	10.3347963921357	10.2242382106146	8.9229317450998	9.00895249495819	10.3425361321413
TraesCS2A01G215000.1	9.6948717950592	9.92440863451287	9.78946995854662	9.60885307270083	9.6386770246042	9.57063552743581	9.67222058124318	9.47299389188694	9.79921603552572	9.91575253770451	9.79565082901612	9.86027688037291
TraesCS2A01G215100.1	9.90728017701328	9.84756037681237	9.95554927610917	9.89669060142911	9.92885937512845	10.0802374842601	10.0275939528564	10.0666104083907	9.80730159474233	9.83554037897461	9.93966852609618	9.72595170672216
TraesCS2A01G215800.2	7.36926420939679	7.24441551970079	7.25564901765543	7.74980961598589	7.76021831984103	7.60971167909464	7.65093334166657	7.91412582479644	7.89344190813241	7.74786843666846	7.78482621164791	7.63905836302211
TraesCS2A01G215900.1	7.6327804756342	7.50552492632223	7.51895507488591	8.18387428701888	7.79018646520471	7.96932634678007	8.01829471384047	8.11567922760873	8.20414738557543	7.98435802383546	8.02285889052184	8.07433890147077
TraesCS2A01G216100.1	7.71825508154584	7.6750366543	7.67723653292251	7.74919073499552	7.72985063508531	7.60801633696978	7.63791468285112	7.80986242196321	7.70744948147755	7.74096982184439	7.69886220587458	7.80411887475402
TraesCS2A01G216500.1	7.63185640933255	7.33463544176246	7.49214888921572	8.21690371747579	7.56848230658384	7.94651434386177	8.01287858784802	8.15106756111352	8.26399940639166	8.08258445141749	8.28810918499704	8.08499854792251
TraesCS2A01G218700.1	8.0404267354577	7.75924081872305	7.84569015255783	7.13172623780717	7.88743398406322	7.77785120612784	7.77067065906051	7.73510772618533	7.98446789382379	7.8149974687945	7.85392410890391	7.39180012267417
TraesCS2A01G220100.1	8.20919562741484	7.92180218401903	8.00638461652913	8.32660655136415	8.14410322730531	8.16638880991288	8.18627356599062	8.33443301913951	8.03293816139703	7.99149936013886	7.8541999010313	8.30425764373378
TraesCS2A01G220400.1	7.70297455120672	7.37447635857282	7.49044923110364	7.61542228083059	7.88281091349295	7.98776538824642	7.77189472762301	7.83769499882158	7.73750768379545	7.83757232387432	7.85734537245887	7.71348590048654
TraesCS2A01G221300.1	8.27897916111066	8.08190099826628	8.19642758952239	7.46018826776299	8.38154638617643	8.25959284318234	8.13541881133703	6.98621496305495	8.38933717471092	8.14210847257623	8.02254309189465	7.96266542549383
TraesCS2A01G221900.2	7.92040277178291	7.82511892108096	7.94345752176159	8.00924776469222	7.89402443893191	7.8261368306933	7.91348586561704	7.85961283942115	7.85015737762926	7.92161358223012	7.8570145006593	8.02732766905015
TraesCS2A01G222600.1	9.03127061678587	9.04464584423186	9.05950129462321	9.11196281445915	8.94018707841582	9.0077365904935	9.01124969287596	9.18937869129188	9.06357000929768	9.08016362977822	9.10352804117301	9.23260640581688
TraesCS2A01G223600.1	9.72499345393304	9.68304129039655	9.72211861656711	9.56655202769755	9.53289121439405	9.65491115309649	9.77904398428669	9.52160924304797	9.8606472879192	9.99647326597195	9.93431633255484	9.85523535936543
TraesCS2A01G224000.1	8.5030177352143	8.19823250505184	8.44586611899074	7.39665831171041	8.25239392049575	8.39427708438029	8.4991243342218	7.60989227347289	8.57407370558383	8.50496774474058	8.58284141806916	7.85574842425414
TraesCS2A01G225200.1	8.29040271498924	7.93718113416266	8.12228881357793	8.37414619935504	8.19674348174744	8.64090174783795	7.88143949650223	8.54536116171505	8.57351686141341	8.5200243720224	8.56240557796997	8.47204143286783
TraesCS2A01G226200.1	7.63646564132171	7.76163507879026	7.64875231055312	7.54312498089268	7.95409340333277	7.86442514945402	7.76746430143548	6.98472101442268	7.96399723971666	7.66342575278164	7.78537016768291	7.46136233116504
TraesCS2A01G226300.1	7.5542016972156	7.41996620485134	7.56888499647163	7.31074549907079	7.59170967481416	7.45680106740903	7.70489039493026	7.149790189758	7.47627983008458	7.55838722613982	7.20446841024287	7.13133913320182
TraesCS2A01G226800.1	8.01053749623729	7.91044904217178	7.97283825900467	7.96202514478828	8.06382478041759	7.89945689006807	7.89507420599451	7.7543525663081	8.08993422925022	8.03124860505459	8.05842653659651	8.17986225369543
TraesCS2A01G227300.1	7.49331025676397	7.90977119013926	7.66786562746413	7.74647016294533	7.88724477871114	7.76449938507053	7.70489126120133	7.3836126479804	7.58000414129873	7.30824475831984	7.57518309890821	8.07859346473093
TraesCS2A01G227500.1	8.52787585465039	8.05268298921066	8.28948411209076	8.91147407517806	8.9815707072814	8.88842110185953	8.60876959031507	8.87326696125249	8.73024091952281	8.83962122895947	8.68387503600538	8.72066253766705
TraesCS2A01G228000.1	8.66645686222179	8.50102330926012	8.58918115442922	8.58792419709964	8.61870682714607	8.58607119990259	8.58886296756263	8.67234796313689	8.65235607378933	8.65042177033361	8.64291026962183	8.55047426767832
TraesCS2A01G228300.1	7.9512331114161	7.89965645610087	7.85695453813003	8.2447803654524	7.94968834034032	7.97626240827797	7.90520772362915	8.36556061723929	7.90692025150437	7.99170529901225	7.92280051257563	8.26251856999135
TraesCS2A01G228800.1	8.64994845706952	8.59028158472744	8.59645942459653	8.6803432054177	8.64924692355078	8.8123448865109	8.76106877912221	8.7845724151793	8.7980378954717	8.81674952219369	8.85153070722011	8.78298616884633
TraesCS2A01G229400.1	7.30269696277142	7.26910748981541	7.31005518190699	7.34185777157048	7.56965854898483	7.47362459241325	7.46962011193711	7.09520932476372	7.30800868684826	7.1793478955204	7.40483228900618	7.22095182233095
TraesCS2A01G231500.2	8.57298607915674	8.5645655611384	8.56686284065589	8.51522837384054	8.53720756629261	8.47235173625932	8.53700345972241	8.54539799806366	8.65565003183776	8.64648133958747	8.64512623697177	8.67149036986697
TraesCS2A01G232400.1	7.54748613900805	8.03572659164498	7.76720870293456	7.77306917853674	8.22054910706625	7.97829947267501	8.24314850171226	7.78123507277199	7.79736907808559	7.41541337323146	7.53612220812931	7.95738160865432
TraesCS2A01G232500.1	7.83248636336727	7.49275669472146	7.82728001049828	8.01016145034086	7.55490661817581	7.66977142129142	7.63038109747461	8.02117161966959	7.96935172928147	8.01983092224487	7.91848381430147	8.2965924085638
TraesCS2A01G233000.1	8.27983813963373	8.10029477139459	8.2439006817709	8.33360296710332	7.55566128030427	7.46251037658608	7.51415529544543	7.66070831733594	8.16926421144182	8.24276260615104	8.15152836435628	8.38955023388651
TraesCS2A01G233100.1	8.41326181968995	8.4070132574663	8.31114554571167	8.49224295104199	8.61147500458378	8.43104774948904	8.44042986242233	8.59415761348719	8.46956224664786	8.4568447148528	8.42815877763824	8.42189584133097
TraesCS2A01G233500.1	7.7366178673868	7.85252814456254	7.78043398003604	7.08709004314319	7.69800967838788	7.74730797199495	7.88573651691975	7.26650679135803	7.78724029801562	7.6896855852421	7.79796958221473	7.34145549155663
TraesCS2A01G234200.2	8.94399592895532	9.04751884169905	8.99870150452287	8.8088491551459	8.8964568837144	8.90747058038065	8.95384596973495	8.75436739012364	9.06727460660931	9.0616567646002	9.00937361997164	8.91763491866651
TraesCS2A01G234300.1	7.88889405888721	7.80345421496483	7.87201382007279	7.5245429829732	7.89208044858072	7.89005277002892	7.867549333935	7.64692707488169	7.8188962892808	7.83439016208826	7.90791915504063	7.76129382981373
TraesCS2A01G234500.1	9.4953043836078	9.33754533852078	9.39430459008887	9.28878844999971	9.48823074446152	9.41990805204966	9.44754643233687	9.42640840186539	9.45153651232594	9.49453441715536	9.44911953594728	9.34259736151025
TraesCS2A01G234900.1	8.88545907221378	9.04658989467549	8.99302436819895	8.95795999057079	8.83451273489857	8.88365050633781	8.8490409187917	8.71841014636688	8.87765606226201	9.01509398814073	8.89241405951383	8.8030529083911
TraesCS2A01G235000.2	7.49946585959071	7.43082231423789	7.57964742746454	7.48804226634317	7.71931193063694	7.60638190585091	7.53182249715507	7.37331866065423	7.77552753532042	7.93936401829509	7.79945752765359	7.47753371085968
TraesCS2A01G235900.1	7.97559280127474	7.92224031458043	8.04723645849287	7.61546663535036	7.93552674165062	7.90863433743359	7.9500568519198	7.86691700958478	8.13412773414818	8.09822015749453	8.08880866213962	7.68506821806238
TraesCS2A01G236600.1	9.08793759987287	8.90771514734222	8.94101685813445	9.00312040919055	9.06837431869928	9.07714716636949	9.02498527160612	9.08042428118004	9.02628252963312	9.06188328473785	9.04848178675469	9.01244135334805
TraesCS2A01G237000.1	8.86332814597518	8.83037459484751	8.86500011765757	8.73399095017561	8.8690755374969	8.89472220356316	8.90329317397151	8.77378196017616	8.89275049564945	8.88672506449722	8.8675178540291	8.63673882311179
TraesCS2A01G239100LC.1	8.57382503701454	8.69018604017287	8.66044911050058	8.54980389939634	8.77008721759826	8.69715480944039	8.6212662862581	8.51071657502167	8.61963523545927	8.67744820922966	8.5888411917432	8.50166568472289
TraesCS2A01G239200.2	8.37182901723796	8.54625230550294	8.42880220347343	8.40344266356496	8.48249353621192	8.26096598170988	8.36489385787204	8.52787613478118	8.31239035881559	8.54429281848524	8.52814951945925	8.63786606491931
TraesCS2A01G240000.1	7.40185752259895	7.67548440427012	7.56722501168844	7.51967720463922	7.4618847995804	7.42375654000052	7.6133152311642	7.6217949013918	7.31900590287858	7.41197157497246	7.50042124713161	7.58352209506593
TraesCS2A01G240200.1	8.73540183485066	8.7142771654553	8.75519738389353	8.6324698231237	8.6782216326197	8.78024883667526	8.86186292859898	8.66060695096302	8.80632527277728	8.7232440358898	8.81290212316811	8.60027415582606
TraesCS2A01G243200.1	8.31209984860295	8.29217873762755	8.28587791064455	8.54700005300255	8.40907458224474	8.46348143007422	8.51100360984283	8.57174801494281	8.45787712660673	8.49551166272465	8.46632933639968	8.54944578671661
TraesCS2A01G243500.1	8.4496701576463	8.46469123258722	8.51409562618073	8.17643854534677	8.51967937026856	8.54270026325347	8.47034509003422	7.96208111244348	8.45230868415844	8.38460919912068	8.46057464676449	7.9970688670141
TraesCS2A01G244100.1	7.25589494939491	7.2437959629057	7.12669825745675	6.93164482445607	7.42973302015045	7.37945275462969	7.36224713596878	7.01060093155508	7.22570905758509	7.28358957910779	7.22267407447819	6.82302516317835
TraesCS2A01G244800.1	7.56294724776181	7.21496059452797	7.3277468451472	7.74214206967272	7.55570917602325	7.59867656573451	7.479539527623	7.92207280551512	7.27749992355986	7.33368852912719	7.35592021907549	7.85965498712047
TraesCS2A01G245200.1	8.7893331476707	8.74282661869439	8.72284632120049	8.72955356000863	8.66495030018216	8.79057928661162	8.54463167326646	8.54504786832975	8.79766519772738	8.67538051562134	8.67137794647547	8.76025170673417
TraesCS2A01G245900.1	8.73086476205189	8.48302348794827	8.56706264202701	8.76812571288764	8.89497239676269	8.87853418215705	8.82164655884685	8.70643154727127	8.8471162313356	8.86600033632932	8.82746518685047	8.71018197062471
TraesCS2A01G246000.1	8.29855735064847	8.1466229082399	8.22808989102685	8.16594748485496	8.31106393551547	8.3015377957542	8.29298215550947	8.24282848890219	8.31031540858753	8.29258301619253	8.31699292031688	8.10259207510506
TraesCS2A01G246600.1	7.88198918294915	8.08542611381084	8.00168452605058	7.74341460060493	8.04955700458179	8.02191535022835	8.02943135434041	7.40042242501004	7.94441437528726	7.87903036757397	7.95243833579564	7.37458469306217
TraesCS2A01G246900.1	8.16897511053056	7.94372140693374	8.08542514860056	8.02743280210682	8.05952163164305	8.06475352974379	7.98136380843239	8.13735275131275	8.24535456799077	8.28335051999978	8.23692374232729	8.13415094475631
TraesCS2A01G247300.3	10.1523110925277	10.2361775297618	10.202424080574	10.2373103964772	10.0591163128584	10.0454675404832	10.0270520896462	10.1558562800543	10.263629454306	10.3395246261656	10.3347967879027	10.4215677333518
TraesCS2A01G248300.1	8.27676000466329	8.34610608304777	8.41005187557772	7.73495333086342	8.02629612965986	8.10488051544008	8.30623877275592	7.99618682156271	8.47197649084659	8.39272542384109	8.4695406611345	7.82814438640241
TraesCS2A01G249100.1	7.7032773185688	8.02681729164632	7.96642400635685	7.93493850030198	7.98317594342835	8.02643145430805	8.01515769554512	7.84909640419283	8.11717194329489	8.14150567743801	8.13032537652284	7.92319819387325
TraesCS2A01G249700.1	7.90652403207566	7.69059529424739	7.96533561611377	7.0875514547971	7.83863272560362	8.0059620447891	7.90771128336158	6.20271625108484	7.86487568804066	8.06767298383428	8.10702274873964	6.20271625108484
TraesCS2A01G250800.1	9.93403300641321	9.94838067824991	9.92043775568648	9.89013562619455	9.83881145536718	9.75773589604978	9.91839959176919	9.90173445739619	10.0494938771289	10.067005025948	10.0987115812387	10.0740390761595
TraesCS2A01G252600.1	7.90452019424687	8.40749994179187	8.04555190963112	7.78753877035683	8.22345057829136	8.07576390719616	7.96629551569948	7.91011283025895	8.13184610560045	8.12967937137318	8.03353201420842	7.92895250906014
TraesCS2A01G253600.1	9.5497820412538	9.32150057599103	9.4450530750083	9.52748427913242	9.77251975304834	9.67898093106657	9.68558718556387	9.59205746242264	9.70501099371882	9.62684717062119	9.70273724071855	9.44374697775855
TraesCS2A01G253700.1	7.89730258796785	7.94535851851787	7.93055377249931	7.46832579074179	7.85516929873095	7.67588222920783	7.69375069785388	7.70606564910489	7.96017359615971	7.70995244885959	7.54030552794948	7.59274721076219
TraesCS2A01G254100.1	7.93849698818641	7.93885283500669	7.94254000086836	7.87122783958104	7.95259253332577	7.94557926936467	8.00058091685678	7.74672281624199	8.16654817168505	8.16141370552357	8.15937941826423	7.9565370746316
TraesCS2A01G254200.1	8.94021842395972	9.07882070307555	8.96348022594276	9.08406915976265	8.66614391641855	8.71060399466455	8.70656834871699	9.06974008207623	9.09014705906057	9.18495126982586	9.15546506147384	9.37226488707526
TraesCS2A01G254600.3	9.89103050959905	9.93397943259361	9.8714361484356	9.89406430817701	9.64539176405102	9.75222252078456	9.76129429568276	9.75032132711258	9.95228620278265	9.97402917237938	9.9710617193731	9.9160054394173
TraesCS2A01G254800.2	7.93481122040179	7.92397720287761	7.90290049761289	8.09298253906133	7.93520766421324	7.8325240340335	7.84953114314417	8.18302159050554	7.82813568760836	7.83346237401822	7.7975106263294	8.21484164842217
TraesCS2A01G255000.2	7.38055103955336	7.21218270132821	7.3935615346982	7.65702630006764	7.5113818057163	7.56903728572753	7.54047219083328	7.0620051210093	7.23945516177055	7.18470236908876	7.26006742707412	7.69786803281011
TraesCS2A01G255100.1	9.28329722525057	9.22047178547228	9.2658934354813	9.09508127529167	9.32352962433428	9.23906705996522	9.26560772612145	9.1734413075899	9.2582088433102	9.19959430846027	9.23148408351041	9.12433897798937
TraesCS2A01G256400.1	6.03726338829632	6.03726338829632	6.03726338829632	6.90268912067683	6.03726338829632	6.91367284330719	7.14304912850893	6.03726338829632	6.03726338829632	6.03726338829632	6.96735879342055	7.07935358392461
TraesCS2A01G257000.1	8.77835484726157	8.69418775057909	8.71741802287678	8.67808798988201	8.81271110383541	8.98612523056599	8.95183803093025	8.69808906305268	8.90766319208712	8.87260293766815	8.93806086012982	8.64607748791921
TraesCS2A01G259000.1	8.48526974651894	8.41350718020988	8.4354936953326	7.74506841856379	8.52349153290444	8.42456883782955	8.35158559439462	7.811470065934	8.51605734486005	8.47457534840858	8.43917191991984	7.71584678574423
TraesCS2A01G259900.1	8.7315179782102	8.66979371266574	8.69190381213321	8.40929721233345	8.63225237097385	8.70691474390023	8.7336926880782	8.86613830456319	8.75301315901111	8.7098524439968	8.69414775863757	8.78871455529207
TraesCS2A01G261600.1	10.027901148866	10.0736490658589	10.0325492201119	9.89867249636844	9.94896855744712	9.8997435962725	9.98663588281313	9.89661498250984	10.1061301021318	10.1499268416796	10.1179725164002	10.0673418019008
TraesCS2A01G262500.1	9.4044901603897	9.28828361678801	9.33717982974987	9.65126868967609	9.29287957322381	9.40152684183171	9.38706846476992	9.65341201969653	9.37663318380617	9.32012993524922	9.41979240905595	9.65971915018997
TraesCS2A01G263500.1	8.08711633715969	8.05602118986703	7.98301158540174	7.73266733303646	7.9023582178363	8.03367427730124	8.13492649213508	7.83870894220596	7.94007883861031	8.04135875516894	8.0748063424526	7.85482449635054
TraesCS2A01G263900.1	6.86156123799731	7.62368497320104	6.87358950413393	7.40789637519563	7.40245358148779	7.65423746504623	7.4896642828239	7.69435842368701	7.04656688753524	7.36681365520096	7.21875508660611	8.10065042713522
TraesCS2A01G266700.1	8.57304444467997	8.44907279274284	8.58318014435077	8.47249329092625	8.60657219746839	8.65473887988453	8.60563395831526	8.28571824571945	8.61102394834095	8.64518688102147	8.62418202301629	8.16675428490663
TraesCS2A01G272000.1	7.32332602930939	7.47981573277605	7.37778318220298	7.46237823022657	7.16861733987482	7.3047907071091	7.34746086730875	7.44270992092473	7.4912267550853	7.51015640096421	7.50787049368117	7.63545766632809
TraesCS2A01G272700.1	8.05556359668354	7.97999065213537	8.04604002301136	8.33849861136392	8.07022527356055	8.10159928335526	7.94649934682541	8.48347560587001	8.02334516506136	8.02130564108875	8.0130800561631	8.5935308886379
TraesCS2A01G272800.1	8.51197195295545	8.49845330782389	8.40560683588498	8.25023752007625	8.43650930976723	8.54026300692196	8.4438653320713	8.09458966410976	8.69911159856376	8.77632994445723	8.6940618461898	8.44432338526204
TraesCS2A01G273000.2	7.54919711088525	7.5386151692508	7.59859207131493	7.41799479328908	7.40626675689324	7.53422780608732	7.53414200418291	7.29971606790781	7.14912233474864	7.37423724185378	7.49017194796559	7.27538896360894
TraesCS2A01G273100.1	8.48130655087909	8.54998133953592	8.59943858977501	8.60715949279346	8.54358372228293	8.54878757081682	8.52881352242103	8.62112506860131	8.41007832421783	8.43772825874915	8.41550924342445	8.15634296957341
TraesCS2A01G274700.1	8.24094686134879	8.16105771487222	8.12001731066475	8.38498240722117	8.37006438656511	8.30608411139398	8.13638120419565	8.46760946939884	8.50478811249483	8.36045590700365	8.47454310296669	8.64809747011048
TraesCS2A01G274800.1	8.91091969242913	8.85657429248948	8.85052354250317	8.93155052635809	8.94485880564503	8.94820991046588	8.94048171625398	9.08398688036016	9.12352029603276	9.05542242137409	9.10986117091779	9.23335425766865
TraesCS2A01G274900.2	8.68681716876823	8.58839711089528	8.62768153760815	8.62033512384635	8.7400594376526	8.75807584568483	8.67325126600014	8.73018709784103	8.74948252771113	8.8115189770741	8.71298594445341	8.64992578621014
TraesCS2A01G276100.1	9.64853705692241	9.46620728788996	9.51659991292732	9.27671225055883	9.74704354093513	9.69345941034851	9.72358122552047	9.34541972711614	9.71391671647902	9.7025973789113	9.72657571779575	9.25022994509564
TraesCS2A01G277900.1	8.87114961624478	8.85784035602928	8.8676574652305	8.53198586883757	8.88344979513205	8.8643152352087	8.82776476698396	8.59161471630523	8.86607874014543	8.90407729270349	8.8985244319863	8.53176057368173
TraesCS2A01G279600.1	8.58875250886317	8.49936536705687	8.64831054296342	8.50368586892021	8.56512378802571	8.61541322853891	8.65736000186727	8.6893549956176	8.34101637322062	8.30398743883728	8.36951812436527	8.41598145848761
TraesCS2A01G280100.1	8.24157276253059	8.28873424383774	8.3082522914042	7.95084912877175	8.29346543601473	8.28322529840632	8.28953561116138	7.88966538293704	8.31863254030616	8.28063157629685	8.28774212967582	7.64123314691678
TraesCS2A01G280500.1	7.60659890151925	7.81863269633577	7.76106977086717	7.46686079906464	7.29175941234467	7.60979343725172	7.6387556286581	7.15786152086682	7.84223278812232	7.47825029151851	7.73753921660883	7.32956394826893
TraesCS2A01G281500.1	8.44416047318687	8.17240974600509	8.39003338335669	7.96865530982314	8.07587110912318	8.13605987640904	8.09935246316739	7.94146218891355	8.23164784330005	8.30593786117813	8.29241401172817	7.72785213066014
TraesCS2A01G281700.1	8.39832322443033	8.36062560305442	8.42183626281127	7.72932549403079	8.295815730606	8.39452264544534	8.33138260419685	7.8071055858507	8.46599900241469	8.45476788656845	8.46780035913098	7.88011225632648
TraesCS2A01G282100.1	7.45317494310551	8.69855182578727	7.43188679988489	7.55898518483804	9.08847236205819	8.1557909969334	7.14046316492563	7.65244386404022	8.14059371323137	8.28898078731212	8.11221403287047	7.58166223479429
TraesCS2A01G282900.1	9.0916334735503	9.11141260314171	9.11641215023199	9.09482398930963	8.99485405658127	9.07288498544508	9.07532218120629	9.17270126561088	9.11998900814042	9.07903770377416	9.14554834712742	9.15666812732911
TraesCS2A01G283300.1	7.99545221946586	7.37746186316272	7.95017276201376	7.75025587646466	8.06659692901028	7.05612300022519	8.15297244020581	7.79729966301439	6.32255986641919	6.87282565966858	7.18866335235793	7.8614143245235
TraesCS2A01G284300.1	7.72172192532428	7.66373705746341	7.72153200507947	7.53041835420905	7.68309740527861	7.74659359806644	7.71440177949772	7.40161431967806	7.77356837767603	7.81748686709797	7.82472604754992	7.73744758421548
TraesCS2A01G284400.1	9.60402950201263	9.56119647417929	9.56522658316507	9.49550318249425	9.65822561669761	9.59291177447783	9.57452649441142	9.55572049825441	9.62507235316008	9.6364184658882	9.58579211633472	9.49952753739351
TraesCS2A01G288400.1	8.56680285534857	8.66352478547983	8.42903241912187	8.66359089746048	8.60384200182208	8.62778880893071	8.64052316659779	8.93063378029247	8.52802070797009	8.42816986316193	8.35569995651896	8.94199750111777
TraesCS2A01G291200.1	8.58070008822036	8.52965657782463	8.57096630153297	8.61214859343447	8.55181033555039	8.6163312279658	8.55361666077167	8.55970421799847	8.63414075983074	8.70867454071959	8.65612555547704	8.60197244305558
TraesCS2A01G292000.1	8.44587452132444	8.17272855462651	8.27313773570898	7.70623364707979	8.54290573997581	8.42393827094996	8.26611409549768	8.35253562298452	8.47126619545923	8.37581756891326	8.39363627967143	7.73345307269908
TraesCS2A01G292400.1	7.23902897895444	7.76934158336763	7.68059284879358	6.33246574158686	8.02089501364024	7.38782933149712	7.78485154565014	6.3073349023558	7.82559579597688	7.6898098083409	7.61203954203971	7.68016970873596
TraesCS2A01G292900.2	7.628076012843	7.65264411815721	7.71206075709467	7.33997410650975	7.62687554447473	7.68277443593076	7.71692514831437	7.19496664566084	7.68880086330658	7.68736764566497	7.74683325783604	7.47898746634456
TraesCS2A01G293300.1	7.36302479489022	7.36824307407328	7.43990240978035	7.14834310650355	7.3486566788283	7.26220934353162	7.29906513458673	7.23389232207641	7.36778652051406	7.30463985481762	7.12575695979886	7.19344122506644
TraesCS2A01G293400.1	9.52498879512038	9.38689827414986	9.52419433304649	9.58495932675594	9.46389391628627	9.47882348653182	9.53039460521346	9.53024720435947	9.42009636221371	9.60550537284981	9.56574180197322	9.42442907052461
TraesCS2A01G293700.1	8.99899998854191	8.95416527302133	8.94265966499621	8.66375440866907	8.85820007525042	8.93382424500209	8.83691824160707	8.82009525822413	8.96710889011139	9.09276177348401	9.00604080144386	8.89165400159712
TraesCS2A01G294000.1	8.20224599546826	8.17583496042899	8.18033837547021	8.2678292760422	8.11760463073136	8.21181704750204	8.28469425289586	8.3569982221893	8.28872970366131	8.24881105066147	8.31934545061225	8.35002174743531
TraesCS2A01G294200.1	7.9687027629939	8.32708279032567	8.09864518659376	7.78637912031164	7.28806319211034	6.71014505111278	6.67445935614697	7.09309668317732	6.73734215554179	6.37842296782235	6.42398085783341	7.9289781473588
TraesCS2A01G294500.1	7.99856915715028	7.94855584154438	8.05935956558159	8.17583239055675	8.22621981056829	8.04958849214025	8.1170169590617	8.18646047312061	7.81187514430612	7.90023267112497	7.92833516202196	8.13893805480804
TraesCS2A01G295400.1	9.77736211996813	9.6435798575152	9.76391477138677	9.82286464161819	9.61134427215475	9.72556851496772	9.83838815584049	9.92351123266794	9.67367456153979	9.6823274540902	9.72210477469776	9.63959194244
TraesCS2A01G295600.1	9.47524177134386	9.56012428539132	9.50242074062386	9.49654954558702	9.49183132367262	9.43436818521176	9.48602671394907	9.52915156357745	9.46109054071558	9.52855861641446	9.45315714945008	9.56469978123344
TraesCS2A01G295800.2	7.58862863688135	7.42643449917507	7.56505442276836	6.53862050709953	7.60199833389589	7.52349973905396	7.54854067043221	6.1193124355509	7.45909860478167	7.35227686053395	7.44272476439411	6.62965670662031
TraesCS2A01G296000.1	9.45397081543384	9.14793458669164	9.29889285919306	9.45288367603122	9.62526120747768	9.54495639463033	9.53841904382183	9.53839019821891	9.52322815769361	9.27866133850354	9.50946482587652	9.43019824959026
TraesCS2A01G297500.1	9.77354046996173	9.85569740425563	9.75858774860154	9.74021862069223	9.79712827974498	9.84783702217823	9.81023495337144	9.84331298182581	9.97028090062712	10.005533279975	9.97302117028223	10.0024077285126
TraesCS2A01G299300.1	8.15294156464726	8.31976029385773	8.26210981022689	7.10472841745565	8.19305705074554	7.58436669346354	8.13720651436778	7.26223721966176	8.11353384632405	7.64186974049912	8.11652297492022	7.28166700584995
TraesCS2A01G300100.3	7.77379737800897	7.60148659715599	7.82023926116217	7.57083731542573	7.88489610781191	7.80535780049641	7.74438643952373	7.64179100761091	7.81548378525196	7.70149721552549	7.69448969119592	7.66986832497163
TraesCS2A01G301900.1	8.0535560625501	8.01106175362519	7.98966381893087	7.8748637108047	7.93035551203799	8.17463363788003	8.18799602042256	7.96023279621802	8.07040660883596	8.1496029795854	8.07717790753686	7.89423535835374
TraesCS2A01G302000.1	7.38044436009282	7.68735051891727	7.47330262060848	7.80785350840959	7.44335851222271	7.61338164745687	7.59940989966342	7.31133299053797	7.6782294097411	7.53338767655807	7.65425365877582	6.8672265992488
TraesCS2A01G302600.1	9.40293413357121	9.49216199562288	9.42474840884549	9.29985463893718	9.48234739753671	9.41200989427803	9.37524700180221	9.37017017285786	9.4043359636466	9.47948974750484	9.36526036646984	9.35124752961963
TraesCS2A01G303400.1	7.86537289626845	8.04165760014334	7.90616488513151	8.58325349767969	7.84451561282115	7.97613871912873	7.8835937898823	8.59376577023453	7.99552458037938	8.0879905994147	8.13436524484835	8.69135052300062
TraesCS2A01G303900.1	9.07478262974865	8.95260969227281	9.00248931638342	8.99922249528624	9.04833535190362	9.06316303083194	9.0446710427551	9.18028384812697	9.06176290857267	9.07384997816053	9.0739934019537	9.04268083279928
TraesCS2A01G304200.1	8.21791742012384	8.1946331961659	8.20762004451606	7.73634545010583	8.27012700933149	8.29762935271872	8.22746790185018	7.77161125130067	8.164504865735	8.20495663535134	8.22285787674097	7.74929054414514
TraesCS2A01G304400.1	7.83076604109566	7.82169801184985	7.69217949529511	7.64577727880132	7.98506340880983	7.91262883477814	7.86667300541279	8.04818872817619	7.93390343871322	7.99591238191814	7.96147426341328	7.97592142911169
TraesCS2A01G305700.1	8.76500996285381	8.75913132466579	8.74321822666135	8.59138007466909	8.61988552639533	8.6084648364961	8.60596833740206	8.56200802002451	8.78384750492607	8.80419908559563	8.77392003868984	8.73673679535139
TraesCS2A01G305800.1	7.45982028470089	7.69663935012445	7.60909058708678	7.79515024322556	7.39646867733355	7.32707887661019	7.35561168135103	7.61007812070668	7.67553610772651	7.81684732277598	7.62568842118704	7.94055575790071
TraesCS2A01G306200.1	7.98325211525124	7.53367054991387	7.89185822669192	8.009515611589	7.66664219112062	7.72073509755001	8.11753622180535	8.06347255510365	8.08011591086319	7.77047237092332	7.96886149458453	8.23137064543096
TraesCS2A01G306400.3	9.88345054331963	9.87037854375738	9.84407699701386	9.86357915213655	9.92607075524853	9.90730558745925	9.88514619954629	9.9088116651498	9.91370313323143	9.84434051374849	9.91176638171274	9.82952612328698
TraesCS2A01G307300.1	8.16181274581189	8.0781733595541	8.12693111760637	7.20597505373802	8.00322064094016	7.96345121310783	7.96339766574043	7.36870636555882	8.28820402276664	8.18751673980985	8.27339276845019	8.05793493737831
TraesCS2A01G308600.4	8.05905669551964	8.18786946988317	8.13114131271452	7.98055219189735	7.98639764395228	7.98095080249497	8.01311162973034	7.99811512614307	7.78839357530003	7.82299266445029	7.97838352315271	7.94464040126639
TraesCS2A01G309200.1	7.89779459003838	7.88688537441892	7.94197902064614	7.61169902103769	8.02669509173782	7.83181773618063	7.93665866998985	7.6304647279518	7.88067557876747	7.72570097624489	7.818683101286	7.55597309027197
TraesCS2A01G311200.3	9.20498207557131	8.90207308811969	8.91648203368211	8.83170784697617	9.21484600442541	8.86706807199535	8.77095947578398	8.49953521353779	9.05518311507128	8.6377709737783	8.72257758117736	8.36900631274885
TraesCS2A01G312400.1	10.2790552420704	10.3192196231613	10.265833628743	10.3880863469932	10.3804111807646	10.3853955577701	10.3425435257003	10.5100367163391	10.3843019017487	10.4610611585265	10.2990663678627	10.5197645927703
TraesCS2A01G313000.1	7.92965070630505	7.97440017208086	7.91204792110418	7.67799217697882	7.77997320345297	7.7678440258846	7.83575337016134	7.63337489100438	7.66355061070389	7.94555655920306	8.13444324724883	7.99748549641999
TraesCS2A01G313500.1	8.96152871233422	8.96119069194708	8.94433611946095	8.83133847335712	8.94272346806188	8.9059584939093	8.98106528964663	8.85927997883367	8.98130621489829	8.9177806442201	8.98144560989519	8.93405920205532
TraesCS2A01G314500.1	7.7381125685639	7.65806884505755	7.68924275214861	7.78434198450915	7.91117005445453	7.73643229129956	7.70059413797151	7.6277668176512	7.58739259281818	7.59671811484966	7.50964902064195	7.91717150915913
TraesCS2A01G314800.2	8.10480675812076	8.0838572125384	8.04993197304318	7.82259498656567	7.98424890773113	8.08311618518669	7.9812387256494	8.12256844071716	8.2613065276093	8.28815420210952	8.2500067209437	7.30450362721051
TraesCS2A01G315300.1	8.90036771596094	8.89807079180159	9.0298321114918	8.71235834963289	8.94528793596329	8.97968340059124	8.9488763911354	8.71664235507258	8.85265147450761	8.86975434662316	8.76698516499668	8.65452684040599
TraesCS2A01G315600.1	8.49793990699499	8.09989931115124	8.1228002808191	7.81065440594376	8.64465579737075	8.25216408961419	8.1028948108263	7.91421144941989	8.51002025824416	8.18925240704827	8.28348321758914	7.86731775466599
TraesCS2A01G315700LC.1	9.2874232151571	9.11934917607898	9.2126921853955	9.28447962103583	9.15611635071187	9.01707134793175	9.02540703667262	9.22802265410462	9.33970276046301	9.38959227695199	9.34261214420266	9.6039891081401
TraesCS2A01G316700.1	8.41104598966946	8.34038493200021	8.40982452097669	8.22174610744991	8.21657393781845	8.26275382428228	8.26890086963698	8.1795908149545	8.31503168953978	8.32661469609694	8.39803461958767	8.22575863608003
TraesCS2A01G316900.1	9.29771383710946	9.23150086459815	9.23033994644926	9.25156046822936	9.26867606369691	9.2616123958633	9.23032387856716	9.29822487978925	9.03220577400593	9.04226149108196	9.00274664878608	9.24417183890039
TraesCS2A01G317000.1	8.33748360571901	8.25606581833842	8.29398712977355	7.87416834810969	8.05736126475377	7.94188952062952	8.12404017791552	8.18131622458637	8.12891600452996	8.36333299660414	8.25843505725352	8.48379581563349
TraesCS2A01G317700.2	5.71688411650284	6.78902407589093	6.84365044608298	5.71688411650284	7.25535517611409	7.27701998184812	7.23468384921319	5.71688411650284	7.28112237710337	6.99877327222762	7.10705278320149	5.71688411650284
TraesCS2A01G317900.1	7.67119320888302	7.7113727552434	7.64972069456545	7.6020461518429	7.78392135694449	7.82711896162629	7.39599013115875	7.59571178001344	7.57528180016443	7.65000185966927	7.50502377354891	7.54024030794898
TraesCS2A01G320700.2	8.78190744827512	8.61430251768102	8.68990945493663	8.59929594290172	8.69793603926492	8.76322382790974	8.72827434103793	8.87423367607018	8.80539042069461	8.87421471860486	8.82635953364104	8.76330023899056
TraesCS2A01G320900.1	6.39267211103943	6.54304594396942	6.65467901541476	5.75352853039393	6.49056391914211	5.75352853039393	6.65179536639613	5.75352853039393	6.61089948126959	6.62211867670024	6.21353849536241	5.75352853039393
TraesCS2A01G321200.1	7.54822478949002	7.58288213299417	7.49957681545119	7.16943071210171	7.44646149002999	7.52371153861055	7.46101841031631	7.16865325390329	7.49824016796151	7.49238711609159	7.44277435396486	6.14913517932028
TraesCS2A01G321300.1	8.5569200942302	8.43838007798814	8.48925724032015	8.71675030223333	8.48367369832306	8.39678752581074	8.43206311515826	8.33282977168894	8.41145066420389	8.55919487508967	8.52705771779644	8.56939682391147
TraesCS2A01G322400.2	8.7810223820301	8.8650421518261	8.84385003874274	8.83873715198966	8.96651381846758	9.0497488587934	9.02888491288827	8.7749000465945	9.10368267055223	9.13824815009454	9.14588295377335	8.73157404369483
TraesCS2A01G323300.1	7.55634950723027	7.47509931307926	7.47380625995257	7.61715928539237	7.57639273728446	7.52031925018443	7.56944545262215	7.82347985558742	7.58285527380499	7.42207208133812	7.56273726363602	7.6883849578484
TraesCS2A01G324700.1	8.07778715448966	7.824185857063	7.91511496851453	7.94463780430548	8.02971638294859	7.86962164906285	7.98284219722535	7.98943688056615	7.87273214777563	7.99248632551928	7.91028197270566	7.92743725978195
TraesCS2A01G324800.1	8.37386705023203	8.35312719206755	8.3991864054794	8.17750694210755	8.18308538925224	8.29232727522013	8.25773324959875	8.28549035730259	8.18755095165119	8.27457596597939	8.12903106617909	8.1706843142506
TraesCS2A01G324900.1	7.81447148973572	7.57939675236754	7.50862954749977	7.12052151909615	7.7251486212934	7.75294653182194	7.46672089784359	6.68979465949781	7.94797639304568	7.94452151175566	7.86813213928209	6.54734716884774
TraesCS2A01G325400.1	8.17051486951858	8.08978626063145	8.07571826631655	8.44263695699634	8.3244646907152	8.30618759560328	8.35943335240478	8.35752234791051	8.39186339390697	8.14073955388044	8.21946216246308	8.46165580651192
TraesCS2A01G325600.1	9.02207028261577	9.1030356390322	9.04599316612137	8.88958998766701	9.09127289173206	9.07947196611486	9.07276326264837	8.89892132343452	9.07770997276094	8.98902655075191	8.97488518402147	8.85667248341809
TraesCS2A01G327100.1	8.59288185085527	8.50508557011	8.53823804564585	8.56998970158318	8.55706968510944	8.60069853649351	8.66200128878002	8.63093525883315	8.59119867126265	8.57456836642025	8.55558750849437	8.5991426316267
TraesCS2A01G330200.1	8.1560889626495	8.04590741235275	8.14279270219543	8.05486317351455	8.01550055001802	8.03857791744593	8.06522552241889	8.176699873347	8.07352565901239	8.11735428851143	8.04750679536758	8.129547515579
TraesCS2A01G331400.1	7.55840585476401	7.16537811389513	7.50306189229976	7.7987933951994	7.73999231977867	7.64239992906201	7.82314727267396	7.79715230498963	7.76506583386737	7.76899338508427	7.78123019174688	7.82386252647588
TraesCS2A01G331600.1	8.8297634491663	8.48918109964963	8.82740380720154	8.81334901163242	8.86351439151197	8.57123625820112	8.82661386700904	8.81143390035096	8.75483815200808	8.8183771757811	8.73094128020227	8.74308015111572
TraesCS2A01G331700.1	8.50847385794708	8.43628160850654	8.52955900435056	8.03419457786062	8.71779990772604	8.63279622447731	8.56320402304847	8.04705764861264	8.60924809854373	8.56211928906665	8.65714340393297	8.07483495784123
TraesCS2A01G333500.1	8.87615791490595	8.7012603322212	8.75778900764583	8.95858491089684	8.65391306948918	8.8197205308764	8.81965923150965	8.7247652689754	8.92745451857924	8.94194876262592	8.93266315864176	8.8781317539023
TraesCS2A01G334000.1	9.24338087552556	9.05589582183802	9.27101544075029	9.3535447010085	9.49360107845291	9.3881205361629	9.35254758301231	9.31189540331903	9.18488012800553	9.03433947672925	9.19745802185739	8.91273011248359
TraesCS2A01G334600.1	8.13422635773032	7.89583426193946	8.0050654875464	8.40340245651737	8.22348448694424	8.11418096882762	8.182704926065	8.55839963010069	8.03970011899636	7.91924568271317	8.02406727612728	8.4298464345201
TraesCS2A01G335200.1	8.19724056156245	7.93832656536773	8.01366827685691	8.5440541407241	7.9953384134925	8.09859469271519	8.0525400692578	7.76451684019603	8.23013150241178	8.09282037165423	8.21635437383479	7.86726192334887
TraesCS2A01G335700.1	7.72230497177804	7.72531585135815	7.74058424185066	7.97864658849505	7.79915658416043	7.83359577093625	7.82233942468351	8.06112152350036	7.68567006836602	7.74148570725634	7.78703989240661	7.94467452664725
TraesCS2A01G336000.1	9.22736148387598	9.21889638850922	9.21628045405325	9.09199723924444	9.23337116311644	9.22804594474681	9.24282398887506	9.14810142147344	9.18732838184191	9.16844757989092	9.18983876708663	9.05707839277971
TraesCS2A01G336100LC.1	9.51347999821852	9.43034169004805	9.44157067250852	9.5443212102688	9.33761068916828	9.26421448532337	9.24338929311065	9.50610831184454	9.50517664160073	9.48722099639841	9.48990366726782	9.73638532434725
TraesCS2A01G336500.1	8.01799818543664	7.99420742099196	7.83812203210897	8.44836198219685	8.32992886060771	8.09746245630776	7.89257957151648	8.34392468862132	8.3079843599407	8.08475843597181	8.26467641130472	7.79763859762398
TraesCS2A01G337100.1	9.13167836104241	8.99334234596539	9.08218236537343	9.09878017461612	9.17471564591298	9.22920329421031	9.1670635694754	9.29456524450958	9.19603629017508	9.20984072075425	9.20472029657556	9.13953067176278
TraesCS2A01G337300.1	9.74772409200325	9.71159970210307	9.69475970581858	9.63191993579112	9.85918808819257	9.89217354992934	9.80640809473245	9.80094809187086	9.80681106951053	9.86144649189072	9.8442863377658	9.66908098831981
TraesCS2A01G338100.1	7.74208206882303	8.01086058673594	7.8127681037038	7.07731345992242	7.6449232073764	7.76146921514655	7.69542341006976	6.01744491158077	7.93019253691103	8.09749038682591	7.88877784886162	6.01744491158077
TraesCS2A01G339200.1	8.19649043723436	7.35213710415185	6.73461229279531	8.66374089341566	8.67481527303901	8.63366396451555	8.53363471820253	8.64049907896642	8.5973677198928	8.75717339913603	8.63943923195501	8.54367074227774
TraesCS2A01G340000.1	7.41039127516076	7.08196408898383	8.31646421845043	8.03912926112845	8.1336202079504	8.06621081804601	7.90175575723034	7.65293898796225	8.35185802600088	8.4325368613723	8.41151970676268	7.97782084011118
TraesCS2A01G342600.1	9.88527852019028	9.81319027854204	9.83650653074806	9.7444717276516	9.66876347935379	9.63412879039689	9.66122914091085	9.64082605917932	9.95709830167457	10.0376207847758	9.86230623050034	9.97708359928643
TraesCS2A01G342800.1	8.91498575047411	8.88435606735101	8.96187446707597	9.05004965110011	8.81280333697239	8.77171422463121	8.90539276493688	9.05363667277655	8.81428219816292	8.72183024720458	8.8616682378659	8.96529310686928
TraesCS2A01G343600.1	8.38482527872618	8.44080647367022	8.47268210216706	8.5261058642991	8.43407248271536	8.35970299155342	8.4765651122888	8.49233337350225	8.30297255717588	8.26800882365908	8.34303615033532	8.36627531349123
TraesCS2A01G343800.1	8.38646759537406	8.37649519315558	8.4844760799438	8.33544816312296	8.30760350633029	8.33509484701423	8.44921915441864	8.31278140913532	8.14953697110321	8.17161423008355	8.22082754972112	8.07086377083253
TraesCS2A01G343900.1	8.89731256667524	8.9138760740959	8.98159382015796	8.80182457876583	8.85978601967697	8.89753928537569	8.95821430884562	8.76903875397314	8.84124639561064	8.82511843316141	8.89222968860304	8.54064722194856
TraesCS2A01G344200.1	8.85862518216637	8.89405206765052	8.93209167459363	8.70247684956478	8.72708713152574	8.82279858790609	8.8543544054122	8.68076689171053	8.95084090769202	8.82083858548959	8.88812449330284	8.82736962559308
TraesCS2A01G344400.1	8.12242838995081	8.10910944249957	8.09053811074517	8.22999137252876	7.83785177835436	7.69487112751247	7.86237246267412	8.12057709063644	8.04277446462933	8.06795632992864	8.02332111600393	8.43289818255442
TraesCS2A01G344600.1	10.6233506581518	10.5358294932265	10.5821799587109	10.5721809659699	10.396562386134	10.3925468969609	10.4483590955295	10.5633397918113	10.6616100026482	10.5972143934687	10.627226747649	10.8400931064328
TraesCS2A01G346200.1	7.73199193629065	7.61811625687216	7.63507325520121	7.67576319422816	7.75937577232581	7.66870469238962	7.71183267242949	7.67052217356692	7.76811666800063	7.6968807331724	7.74636312502738	7.63557078146319
TraesCS2A01G347900.1	7.24052209469802	7.54004128944182	7.43727733215959	7.03438019847994	7.45881319116047	7.52598474804821	7.55684083832672	7.18770129169345	7.59910545334665	7.60412056895738	7.50589680354208	7.25619194281674
TraesCS2A01G348100.1	8.3419773205196	8.24101578682712	8.29830714466417	8.06642817898975	8.09101737418275	8.11410817683113	8.23418818540784	8.13973710363331	8.31224267360556	8.01963810180616	8.39187724474621	8.29224154060231
TraesCS2A01G348500.1	9.31340245809327	9.45299615353605	9.39848858174327	9.34336439093253	9.11363978187511	9.20199636409871	9.20791363889442	9.22941334839588	9.36083740706457	9.41782647191931	9.37337325321391	9.44779941269851
TraesCS2A01G349600.1	7.78969664601345	7.76708718525736	7.7899547402228	8.19659278196902	7.79713753032186	7.78634937327142	7.81813829916421	7.95029786708356	7.69220237485771	7.72741371459964	7.69735886334627	7.90993916458781
TraesCS2A01G349700.1	7.64443523125098	7.39115437602338	7.55284978988467	7.83682889398739	7.67871462112873	7.65241972712157	7.57091338736744	7.67426387748021	7.74192297901814	7.71330051672566	7.80538067663822	7.74034063373998
TraesCS2A01G350700.1	8.68726458029474	8.57722493872004	8.60567576651659	7.85937867797818	9.04325310218613	8.67366090977171	8.57547411726348	7.7801042720786	8.98500139448853	8.81297162438758	8.78692587257957	7.51969822476451
TraesCS2A01G352000.1	8.08703749048621	7.97129944239692	8.12406234261533	8.02907791815315	7.77880827816343	7.97559347750506	7.98922359227941	7.81320135988069	8.06068870401178	8.08879120945481	7.93506263273246	7.96127369021411
TraesCS2A01G352500.1	8.78693910688075	8.77684210485866	8.7861982348378	8.77998381791394	8.76499784060584	8.82564544652367	8.82762441452489	8.68974523305208	8.73224801187442	8.74861293233094	8.76114463774413	8.66017754036323
TraesCS2A01G352600.1	8.38018004600935	8.23278351292514	8.31318097378246	8.32774078797876	8.43561294690842	8.33078453859061	8.34468971451582	7.88418764797903	8.46258296161941	8.45533735665807	8.46629335269962	8.20844733579981
TraesCS2A01G353500.1	7.10320360733771	7.49309366081162	6.91557910227378	6.61279430162049	7.83670681601074	7.04108936446061	7.4011585608765	7.52615058316981	7.38734770547017	7.28649704905838	7.0326503887807	7.13910544700012
TraesCS2A01G354200.2	8.92535431276088	8.84217948625241	8.86025143352404	8.94127089831157	9.20481825827336	9.09429457757651	9.01445259640937	8.97732058974251	9.1783802471704	9.24596040587452	9.1783126178048	8.90639425467753
TraesCS2A01G354500.1	7.76811513438347	7.66545215184066	7.82227986558458	7.63480885840422	7.60697167786316	7.67788515797828	7.65998674631573	7.77102214312777	7.80919578256402	7.89066587090912	7.84517627072465	7.75471054051602
TraesCS2A01G354900.1	9.20453122676686	9.137204182937	9.20990743799232	9.41993146981248	9.23504912170367	9.24418809437264	9.28382922463426	9.58967224859681	9.13399928478655	9.12068798577647	9.18342611406793	9.45482331829922
TraesCS2A01G355600.2	8.16921560582575	8.40053302997092	8.32264603615793	8.17846713967253	8.13772001054948	8.25541037718487	8.2108327701394	8.20920088659317	8.4096435199153	8.45703093720195	8.40934585406791	8.51129209477651
TraesCS2A01G355800.2	7.72370301212848	7.62451065274566	7.71050793916767	7.426266569414	7.72522979304508	7.71668650066633	7.78204563231807	7.27965857768668	6.2480861123556	6.26280072386124	6.47074168647635	7.17661259207919
TraesCS2A01G356300.2	8.46574432535621	8.31993297585426	8.38456714275855	8.45932467442189	8.54471659265176	8.36362834680652	8.44520168463203	8.42992727311319	8.48911182025471	8.36071164859447	8.39531956122426	8.47081316672451
TraesCS2A01G356900.1	7.95163581749048	7.86882448488558	7.832954751333	7.91971906052674	8.09840251994046	8.01831344127834	8.02910119135512	7.88357207711772	7.8997221204388	8.12414841282465	7.89671075109882	7.87510718494805
TraesCS2A01G358000.2	7.76753473798061	7.74713404102779	7.82077770210774	7.69592514701027	7.76280951561411	7.81024908424713	7.75402636085349	7.77425804258761	8.04021258328636	8.12522754563603	8.18380163311497	7.81483978904562
TraesCS2A01G358900.2	8.76709155477538	8.59022920015538	8.59302485934339	8.51812511776886	8.45788805143729	8.63945343778781	8.61630517063596	8.28453539286391	8.63525485007527	8.64275373257666	8.71589526440533	8.31118769525182
TraesCS2A01G359300.1	7.79994294888047	7.68100036957877	7.74095081305001	7.8956542477725	7.51086106933173	7.5625342755363	7.65911402768058	7.42562325288923	7.91075802220999	7.87707654355357	7.81699196759711	7.97329696259084
TraesCS2A01G362600.3	7.56792358174121	7.56040050095399	7.54392037846961	7.65006886155219	7.50305009369162	7.51684620975022	7.5783373467836	7.75777399550244	7.38307756215307	7.52413014499178	7.35178401640561	7.69270933121974
TraesCS2A01G362700.1	8.34132248219081	8.21848699505276	8.39236373697463	8.3348790410501	8.35464496256737	8.40739332979602	8.41803369786931	8.29809691977953	8.27866845214122	8.19374473163944	8.37528768655915	8.21248382004628
TraesCS2A01G363600.1	8.4367987242679	8.3548634396385	8.37316746713745	7.97232645869071	8.50778866933629	8.49430525983637	8.37246774332471	8.13686799628204	8.50589098760308	8.48772409640834	8.4896306771686	8.20185530468657
TraesCS2A01G364000.1	9.86943389085908	9.54572768224818	9.6503737671699	9.79713574783212	9.89344373852122	9.86233461246025	9.76448867798178	9.71867735867689	9.77599672727576	9.56795115091189	9.92288841877202	9.64103132349842
TraesCS2A01G364400.1	7.03665987851221	7.25789097284669	7.22095502325346	6.02085893368493	7.18810525579658	7.26579929656932	7.26920626663408	6.02085893368493	7.26450568853005	7.21531427706052	7.36465203462775	6.02085893368493
TraesCS2A01G367700.1	7.73599218391425	7.58273318512608	7.64798308519544	7.72247755153221	7.64129086635385	7.58966255304247	7.64780648916347	7.59304735853035	7.45393393695883	7.46134909473047	7.54604307959703	6.95322467053707
TraesCS2A01G368500.1	8.4811254779285	8.1020612330568	7.73633377881655	8.4496286383477	8.11762756243789	8.40366233344963	8.39287173099574	8.61807881595566	8.54640565900181	8.37610260538158	8.56614138064117	8.49157183780893
TraesCS2A01G369800.1	8.56775038069876	8.63950404273663	8.59865849929682	8.58407844317514	8.475599182583	8.57398759135395	8.64003708608097	8.40409950301238	8.61069739167617	8.59794040349656	8.56960985869443	8.51718638053928
TraesCS2A01G370800.1	6.38599788625571	7.02375431051137	6.57843811528005	6.71386224404795	6.94468033108839	6.99437919190304	6.75069686184387	7.38199296550412	6.47610279731625	6.44194425361248	6.34083569449614	7.72323580835167
TraesCS2A01G371100.1	7.6562872809167	7.61881862010219	7.62221001120923	7.53715189488388	7.36690460268353	7.41227219269345	7.4794191077337	7.4642594608122	7.70906678949936	7.63127800906266	7.6930934609605	7.79119558719351
TraesCS2A01G371600.1	7.80205972125911	7.76330154812936	7.7593501158861	7.95353439721755	7.9440875720585	7.92462185266349	7.93699073401447	8.09000165732107	8.15264460354576	8.18908129875278	8.16784925087159	8.43551629527211
TraesCS2A01G372500.1	7.74430936889586	7.86577090726279	7.7167966230633	7.17898913310168	7.72255993153415	7.47561549807591	7.75010545251699	6.31967483805751	7.55781613443599	7.70090261107076	7.7125787902329	5.88555832016073
TraesCS2A01G373600.1	8.79270132077064	8.68780317219052	8.82753234185261	8.71339454946403	8.71942837491751	8.75204146624763	8.73928563580174	8.65371710238857	8.73108647308304	8.76870535924713	8.8738823714658	8.76445036616814
TraesCS2A01G374600.1	8.72796146560518	8.74646158823818	8.65234968609935	8.22012111924329	8.80410309272636	8.6588166310727	8.63297813251974	8.2840454641096	8.81028197505161	8.75666243686083	8.78604516803523	8.30307935437
TraesCS2A01G377100.1	7.17282621815486	7.30860545638613	7.33007223565491	6.78887779559793	7.4361228547055	7.40536017142832	7.41643432198305	7.52749766957051	7.1941490850249	7.26060981561017	7.01227233308695	6.02602709587711
TraesCS2A01G378200.1	7.05705599916729	7.64508721000701	7.11692111120459	6.79220753875878	7.64027202169829	7.74842839042889	7.80411415675743	7.24413623237974	6.97090252751331	7.03982843678866	6.74170525960058	6.25591867501775
TraesCS2A01G380500LC.2	7.81765650613996	8.09343496855315	7.95800951025845	7.74449118471773	7.99585162659004	8.00883722082228	8.0936909190874	7.87531450619371	7.75464416852746	7.90924926520848	7.7318182607903	7.78796032748017
TraesCS2A01G382100.1	7.47925157516818	7.46391685017649	7.43006166521619	7.05313159030572	7.51985233670033	7.59089655904498	7.48518977347621	7.02763438432635	7.45647455439438	7.65005980785494	7.5811556389662	7.09378262604572
TraesCS2A01G382700.1	8.74502866350956	8.69900394964182	8.66280757843714	8.66848453846373	9.05477258208939	8.88492851724959	8.85920286563328	8.763153744675	8.77438204702285	8.59014116429331	8.68604947937698	8.51778735703752
TraesCS2A01G383100.1	8.98263785212242	8.85106233117349	8.95659465798115	9.0119643829055	8.94918488546556	8.91050442444864	8.89211138895242	8.98843353714235	8.99993873446938	8.83044318300597	8.98740130743494	8.99405892633214
TraesCS2A01G383600.1	8.77106030059637	8.77238879482497	8.70030494637477	8.55274515982388	8.89650952835502	8.79706691203143	8.80710235355624	8.76270507471456	8.82642477512504	8.85966467681797	8.82413357252455	8.72979315475724
TraesCS2A01G384200.1	8.71715973142387	8.52962450479489	8.60298612603161	8.55194140155636	8.48437105910648	8.07166732841492	8.33706214194743	8.10585761625735	8.77895508246959	8.59588984389043	8.75227481673676	8.67405665393881
TraesCS2A01G385900.2	8.95526266536008	8.99967818986186	8.95294492061277	9.0185828309321	9.01907691363455	8.89057081069306	8.99944974107214	9.05207548332721	8.92495546764394	8.93164597676066	8.9673131888068	8.99570201295228
TraesCS2A01G386600.1	8.67643409587137	8.68756085786808	8.7726893339229	8.82532535483636	8.68048042360705	8.69276491505863	8.74584446554049	8.84704899339787	8.61032249665711	8.59027069351044	8.70980864259776	8.446885406751
TraesCS2A01G386800.1	8.87358988105445	8.82992632588008	8.82056042346547	8.57193434380821	8.7668844752748	8.70633911830942	8.79098719641863	8.78082910074355	8.80300696961637	8.83764481433598	8.8658564586282	8.6219927873772
TraesCS2A01G387000.1	9.24455404353097	9.23971615250644	9.25425265441402	9.24227346309231	9.04383651940969	9.08087765831704	9.18385137613078	9.09130479497661	9.22123672015869	9.34099849309387	9.29402871955593	9.34158099935885
TraesCS2A01G387800.1	8.75533903482028	9.02859183681791	8.88508260657614	8.23477163913044	8.81304166531458	8.84893890044658	8.82077750188951	7.95045764520868	8.80339801832576	8.85296369113797	8.82263825860288	8.32139638977701
TraesCS2A01G388900.1	7.17381884592229	7.19112332296531	7.31347463287383	6.96272390883523	7.17569320982972	7.56418638322862	7.4105543654008	6.85448361027581	6.70334850975063	6.55652770846497	6.64664932617933	6.13839215625501
TraesCS2A01G389000.1	6.58683758793158	7.41201921571782	7.20076374715689	7.71021660613927	6.92461856703071	7.24589618485666	7.23919773225663	7.88687884019663	7.47174152146904	7.3041116467062	7.13374370386352	7.88978805072291
TraesCS2A01G397100.1	8.23998028394626	8.23932137633594	8.22883825843385	8.15679408260487	8.18976941295612	8.22477516163121	8.27809571068339	8.19479078063751	8.17205205934216	8.17889303103609	8.23300972714241	8.08914799970431
TraesCS2A01G397300LC.1	8.43084894504991	8.44778705356625	8.39665413076399	8.15122066420074	8.47306965736851	8.34536158346713	8.36234108284727	8.11422472069304	8.56507149634826	8.35725350034697	8.55212143279553	8.0551172943386
TraesCS2A01G397400.1	7.47944894345151	7.43191380840336	7.45142374291336	7.88001610127723	7.78964912731993	8.00323388476464	7.93358209270862	7.99769631957272	7.85966165419743	8.17806357676455	8.16011491965615	7.93318664907269
TraesCS2A01G397700.1	8.40766791341512	8.36622439778657	8.3598446430319	7.97999290734232	8.41698188087472	8.52528198913618	8.47348695936371	8.09143392687713	8.50190688403486	8.65890423930459	8.58616499403621	7.92113036563879
TraesCS2A01G398500.1	8.32451211430175	8.32572677914605	8.38559777245251	8.4887748926837	8.425585342979	8.34873580670772	8.35869382335282	8.49081902344006	8.03211377045992	8.18090161227834	8.13883331655011	8.35113967989865
TraesCS2A01G398900.1	8.90603533108359	8.81226261894149	8.91293011525806	8.92982188077295	8.83151531479425	8.89743773300268	8.8715438548969	8.96080130155975	8.87470339496743	8.72358084589627	8.88138861930991	8.6237097600695
TraesCS2A01G399000.1	8.14095766435476	8.07255123478178	8.08899105492767	7.80002120491845	8.11690073783642	8.2415774394331	8.09650534259891	7.92327297299652	8.35033255492748	8.3221554149173	8.1515570799061	7.92405608498468
TraesCS2A01G399100.1	7.05247371049213	7.32082084155874	6.96831277449812	6.26176794645171	7.33138798938862	7.15029205729026	7.16441326909856	5.87399312135547	6.99656895843136	7.21577918194946	7.00006669899338	5.87399312135547
TraesCS2A01G400000.1	7.7662044160787	7.94438551032465	7.92453097608753	8.07612329093478	8.03803140959851	8.04785861160619	8.0291614492344	8.01248452311595	8.04223845369425	8.12556036293632	7.98607521181859	7.65620096883342
TraesCS2A01G400300.1	9.02992083645145	8.90216517560028	8.9672470440203	9.11328967135176	8.92794986102232	8.88259486436403	9.01800369500415	8.95126027337357	8.93806820989074	8.92310222742898	8.93542510107244	8.93158286718417
TraesCS2A01G401300.1	8.1032260652899	7.82168648646863	8.00090791409958	7.85097968092995	7.84211276785739	8.29799054785999	8.36014682379145	8.25363388995114	8.38800589083405	8.4209770853214	8.35059330601628	8.24154796847981
TraesCS2A01G403100.4	7.95843577996799	7.60419641011636	7.73342311534957	8.21021982563273	8.05914930400919	8.13736357347081	8.04762741408647	8.35769784164451	8.15778651011418	8.13656479647339	8.07017849696746	8.37530839121333
TraesCS2A01G404100.1	8.36458576650099	8.46918754203598	8.3541765489182	8.04534860427717	8.32040857192666	8.22891177336643	8.34626497068725	7.7079952360715	8.31360791110303	8.32887066625386	8.11221621619659	8.09544590737341
TraesCS2A01G405300.1	6.92305399629328	6.71032893517231	7.06603641559223	6.96337542824673	7.592522300821	6.9584339495981	7.20845679535733	6.93125969241384	6.94786025471413	6.3436109350821	6.70333028153863	5.81022418471154
TraesCS2A01G407500.1	8.50826551594463	8.50929419619211	8.49651185744184	8.04319189574189	8.68125812665705	8.61119343554225	8.60564996251388	7.91592580687045	8.57331301005954	8.50157669385111	8.59238015413261	8.04722895045302
TraesCS2A01G407900.1	7.60277974753901	7.56605840136913	7.52696024896719	6.6056615996712	7.39264023561569	7.48188683722447	7.24649977480451	6.81151284079252	7.52343402763602	7.48412218531645	7.3670682960388	6.53908381489658
TraesCS2A01G408500.1	9.68346748723832	9.60342840524484	9.74772352888245	9.7041707914363	9.77556239532935	9.71910253341029	9.68608742824984	9.68371855772733	9.76539947410635	9.82017782238566	9.77004731565925	9.65698831512313
TraesCS2A01G408900.1	8.19048102078207	8.44227509138856	8.46447827143775	7.92309076998658	8.43032204688402	8.55352017421351	8.43120778927929	8.07664400666033	8.3079016469339	8.37942730430384	8.32131317427201	7.79954806783342
TraesCS2A01G409200.1	8.82463999387543	8.68486061716237	8.78722234346409	8.52031418897207	8.69068601376903	8.69726228593547	8.71768204002802	8.32936233792183	8.78739464952377	8.78645607274254	8.76293025204384	8.52226177038623
TraesCS2A01G410700.1	7.97158094056221	8.25444324013986	8.05555036955119	8.25078914262539	8.26345784121923	8.33851000871427	8.1924091571629	8.2714617035775	8.00670273453138	8.11604004889061	8.0844099477607	8.48654967475896
TraesCS2A01G410800.1	8.18408332979056	7.94709018780867	8.0908724947903	8.03538444831847	8.13087773212674	8.04803852414044	8.05869407605366	7.93273196899106	8.10038615916169	8.07102738321109	8.08402990301438	8.14097192845994
TraesCS2A01G413700.1	7.12427531238536	7.25538071875518	7.25922007041781	7.61994998750484	7.30500448342373	7.30394993648692	7.37653233820515	7.48634467128412	7.50334657237491	7.43719830150187	7.41660144843214	7.80832589733187
TraesCS2A01G414700.1	8.95598041792283	8.80201789058261	8.84647087836394	8.96617011801426	9.10803463226185	9.05580287234715	9.08830334448399	8.92916154472202	9.08206145445801	8.98872883787108	9.07484778956926	8.81237551831078
TraesCS2A01G419900.1	8.70348053117731	8.61457893603396	8.69327243623668	8.53820522340454	8.79926033704354	8.71891574307042	8.67528658798559	8.6188256294811	8.80664886053298	8.79380367780062	8.80137983283567	8.57302408174692
TraesCS2A01G421100.1	9.14746503528806	9.12553162074486	9.12836804175435	9.19509719585412	8.98902631800733	9.02492051564806	8.90606117089231	9.25646224935519	9.00441127019159	9.02599939222734	9.01984992284542	9.28716363726099
TraesCS2A01G421400.1	9.02328399740114	8.99425583894358	8.99391404247954	8.93884056919122	9.13518529160023	9.0180167376553	9.02871610584071	8.93795759263122	9.07683338492414	9.0007372906592	9.00376656685527	8.9153994711168
TraesCS2A01G422500.1	8.4273484216472	8.30290980354147	8.33384072274848	8.42614922483014	8.47755544234318	8.47194009805005	8.44488671320579	8.59514716046764	8.53478944310343	8.51941256545711	8.54561028297868	8.57050081936887
TraesCS2A01G423300.1	7.74195748164332	7.71227496695033	7.55983429016229	6.86157761385619	8.0006235799251	7.8334962835697	7.87498771686541	7.0208544701334	7.9288288919572	7.87847672170432	7.80116407470187	6.77263176289602
TraesCS2A01G423900.1	8.0640297289095	8.16942977789037	8.05913849317756	8.09334353839875	8.10465679952795	8.02498612757716	8.04647653782373	8.06210077173522	7.73209356261338	7.86531414268007	7.71436677808041	7.98924431501321
TraesCS2A01G424600.1	8.43370108180835	8.1593298131262	8.39905641137038	8.54243984629881	8.2197447708401	8.34378667807992	8.31545345978644	8.62740268130205	8.50413877874369	8.39406783935768	8.5222117241419	8.61435957517756
TraesCS2A01G424700.2	8.677126469751	8.68039626175387	8.6419425694523	8.61459421254755	8.68227954449246	8.74910266827807	8.72452900308303	8.68581612065407	8.74002252213476	8.74421353798741	8.75551070611613	8.64660657637654
TraesCS2A01G426000.1	9.16258768146458	9.13418747491718	9.15847011795366	9.2102315377051	9.20361356605429	9.27721757110353	9.32931219676124	9.39879795328	9.15730796110754	9.20654663235881	9.20717506855998	9.22017285480159
TraesCS2A01G426900.1	9.60917272671331	9.65098302299215	9.5767844266801	8.61042625838392	9.51018015231397	9.15636315502178	9.55821389677284	8.5497390934377	9.59955710217885	9.56978152045779	9.60927673550107	8.77234267455766
TraesCS2A01G427600.1	7.59750940355689	7.74247005654052	7.78519554062034	7.81211985138417	7.65864223100032	7.56076623371031	7.62974164540237	7.57022767763962	7.73025370936804	7.74427700149179	7.68841227797581	7.973285275705
TraesCS2A01G430100.2	9.06267952466241	9.01690922130618	9.07093552269972	8.95878777450568	9.07322405421967	9.09750137832681	9.10908057260368	8.92249401618002	9.1253934686822	9.1536527836155	9.11463926871953	8.77622984686423
TraesCS2A01G430300.1	7.55067431405267	7.48273369023396	7.52498283908036	7.25275409463303	7.51606813066469	7.53415705314327	7.52416385026173	7.39368834638622	7.56237381263306	7.08778782185234	7.03106898560512	6.99555602472129
TraesCS2A01G431000.1	7.60708773334184	7.61028036886933	7.60136054866269	6.84096741804011	7.30958781645877	7.55378675663626	7.57218919336203	7.5092518084147	7.71161997080279	7.78281801767818	7.71619768772397	7.8616521665318
TraesCS2A01G432100.2	7.95858690189214	7.89589220346477	7.98709609892493	8.27392946984506	8.04147732066798	7.95771831096173	7.98006401549082	8.30464714128647	8.01231514034923	7.97072306743681	7.9938784405617	8.54782163483632
TraesCS2A01G432600.1	9.47100437986883	9.18111304190109	9.28464105153286	9.56814987889421	9.61439957352086	9.55362226354735	9.52950916739699	9.65039670157637	9.59964977735063	9.52971202964068	9.59630403296647	9.4998024980795
TraesCS2A01G434500LC.1	8.98510717627777	10.8307744189815	10.9358768342571	8.93402157403371	10.5979035583767	8.99604282802623	9.28021879673006	10.6904189213944	9.27733067270328	9.13506335500525	8.96136527782495	8.91377793021877
TraesCS2A01G434600.2	8.61859319128937	8.55143963054981	8.50352271736673	7.91919880990667	8.76079689634605	8.3099605577121	8.60526707952182	8.0023460075931	8.60058947614279	8.33337177450729	8.47411156080888	8.05752048140785
TraesCS2A01G436200.1	9.10744929013614	9.00450704335512	9.0711142094407	9.04424087416574	8.95769946091773	9.01700188890725	9.05036869861214	8.69582046578837	8.95224162587144	8.99893262849097	9.00114974978207	8.44034209100056
TraesCS2A01G437100.1	8.81140109753663	8.90216847636774	8.8859551287827	8.88119204460588	8.91113111657212	8.95254886165741	8.93970991540085	8.94636146867203	8.82195499971942	8.77398913236696	8.82342457337453	8.7587987672786
TraesCS2A01G437500.1	8.47194377613469	7.98789292261854	8.44236063694511	8.36480163454233	7.89331023493901	7.82537829885019	7.98482789922397	8.08031283795712	8.12991123464942	8.18384146474637	8.58728554324039	8.44298461072849
TraesCS2A01G437600.1	7.96812477654981	8.07967542003234	7.95192367250248	8.16838410783393	7.62929384988517	7.92720547790411	7.96621403310823	8.29744372184235	8.01019856823934	7.99627285139495	8.05740212509336	8.41699510660044
TraesCS2A01G437700.1	9.17076004902624	9.17173022814052	9.09079355685603	9.21144594007284	9.09001170616943	9.13289140932729	9.03379855464163	9.13092077423736	9.26871581452782	9.23589147037461	9.29629276415866	9.37091620791046
TraesCS2A01G439400.1	7.6266325370586	7.17542165134653	7.13659068660702	7.320754239048	7.72764517782753	7.51262951977297	7.27490247919846	7.54003845123081	7.47464149684308	7.17232400798538	7.05077975456051	7.11861063723389
TraesCS2A01G442400.2	8.00729389697816	7.96419052816156	8.04275037596116	7.73424512404862	8.12527188374895	8.13148071792424	8.11000869098952	7.47734164435711	8.0373747059911	7.94999522568575	7.95755655497996	7.48899335332516
TraesCS2A01G443200.1	9.77075556411761	9.69222675998377	9.70906019918244	9.71337977307301	9.70509151141816	9.72846350205381	9.72060918502418	9.8695657799676	9.74456424214154	9.73436788302777	9.74113935752452	9.82363121733724
TraesCS2A01G443900.1	7.2598032020485	7.22275788935916	7.48374342483932	7.27540176830153	7.0847663396521	7.22850937565665	7.04704102714059	7.31265735061588	7.64496288870296	7.39497978516609	7.57516460601953	7.29266199224237
TraesCS2A01G444100.1	7.0984772445869	7.05289564756406	7.12218692423291	7.38151520021902	6.70077247546575	6.95566342671989	6.99381330522603	7.30748735926978	6.59009451198482	6.62093549146464	6.76829030298934	7.24410826740808
TraesCS2A01G445100.1	7.74516518819625	8.56142844649938	7.64784818922323	8.55310961527952	7.90240016950288	7.78870018459416	7.90058704214678	7.89335641664275	7.69624853561878	7.99345856463144	8.19196964718162	6.50127675426064
TraesCS2A01G447700.1	7.26370498668564	7.833982689867	7.79568600353166	7.29982581256544	7.76824369777079	7.91560779525164	7.87976939516328	7.23601112043559	8.0460699882171	7.89004879118919	8.00997416350334	7.21744178913957
TraesCS2A01G448400.1	8.12929585147734	8.29346571091116	8.16113147668332	8.4045547315605	7.99893076239315	8.15843802445816	8.21652860978734	8.488426936025	8.33799267163703	8.34875573792484	8.40874429588235	8.65403157245762
TraesCS2A01G449500.1	8.12353114752807	8.05248513788129	8.08744547947572	7.86205118268122	8.06178956404566	8.10961626296245	8.16713159894439	7.90714914481024	8.07903024853341	8.08793077109908	8.1175866080541	7.89008638111834
TraesCS2A01G449600.1	8.57626957032609	8.50683571657289	8.54167334853892	8.61920728666979	8.5487626828398	8.54142294112774	8.6520053617634	8.67509691481334	8.47540449364907	8.1833375482874	8.44024487472105	8.17198775438038
TraesCS2A01G449900.1	8.11806341610367	7.45493778511868	7.68520548055592	6.95822793389088	8.25499964136572	8.04153651877991	8.01067024361627	7.45143715159759	8.28891122080795	7.93600702405239	8.1158981702475	7.53667310303698
TraesCS2A01G451000.1	8.81154689084982	8.85266364065256	8.86505691185877	8.54812908897171	8.58985741082773	8.80504514249285	8.56573329932496	8.43539351620357	8.77379974977362	8.72955151614592	8.77344078501757	8.54946586880844
TraesCS2A01G456100.1	8.86292623127713	8.81983933418059	8.79249381834908	8.71663833770131	8.85774459009212	8.82435147106194	8.82996226777403	8.68270340079023	8.90757867259557	8.87139976792759	8.8937365375637	8.75186628413149
TraesCS2A01G457600LC.1	8.88753756802802	8.80323479823345	8.84287566606188	8.71772339865004	8.94811892755004	9.10095052752139	9.0717010258374	8.81723642839828	9.03182061300293	9.00508859040803	9.03474309395666	8.69345535976699
TraesCS2A01G457900.2	8.80582138136165	8.74044688010845	8.76254639996134	8.07956976720492	8.77042570157339	8.14966536460681	8.82051138478282	7.98175492870669	8.45029572345197	8.55552048140393	8.91652589734171	8.09353969343678
TraesCS2A01G459600.1	7.573923758661	7.77111010136513	7.59328122701349	7.31008854951177	7.72990475510251	7.5370472655814	7.53660329337331	6.96192467393829	7.5656950766854	7.52305806883063	7.42324886390179	7.19891810519257
TraesCS2A01G459800.1	6.18888458626905	6.51612332216297	5.97007838078158	5.73126375597706	5.73126375597706	5.73126375597706	6.94437265157067	6.35262043934355	7.42923089006084	7.12537768067732	7.26943721518748	6.71272774198068
TraesCS2A01G459900.1	7.77059372090289	7.89224230389875	7.93542453159731	8.00739036147461	7.7084973861827	7.49037812258247	7.67722979268041	8.36756111967552	8.18925412587886	7.86305830797096	7.98246718793453	8.24750832346164
TraesCS2A01G461600.1	7.86614157627546	7.85399231394849	7.80932593697998	8.04263722859076	7.80320319425083	7.86318526202121	7.90162543929956	8.54007890399512	7.69806354847696	7.7992582236432	7.94459189678902	8.33857730489365
TraesCS2A01G463000.1	7.54936443733984	7.56676497029535	7.58731370422283	7.57222164895079	7.557455345872	7.57218470637324	7.57017664801696	7.72182510879633	7.59271472644769	7.66103503672546	7.69821987878582	7.69917778934477
TraesCS2A01G464100.1	8.03144373041868	7.57797933471742	7.63129108116526	8.42386053777941	8.36441500843778	8.34021545772809	8.36050846263099	8.36207146589662	8.3704401607509	8.32943929438342	8.35803917853711	8.28700842343692
TraesCS2A01G464300.3	8.53706060401278	8.62588838550533	8.61481261222291	8.25781675264825	8.26887636356798	8.35700704322337	8.23860137785013	7.86571663250215	8.34811884910996	8.30831657378714	8.36053941287414	7.63740193863803
TraesCS2A01G465200LC.1	8.24137335436027	8.24238822400716	8.39524958286168	8.46466999565506	8.53224272173777	8.55785266883706	8.42325322015072	8.40187100864832	8.04462150902401	8.14975137677489	8.19363141267593	8.1070464334999
TraesCS2A01G466800.1	9.58126481347325	9.39436629837195	9.4628159377551	9.57033454656337	9.59943035906092	9.54679797565071	9.5808006302156	9.65062902371986	9.61014460034224	9.58766207292802	9.60578894452453	9.51100718581753
TraesCS2A01G467700.1	9.65547755536918	9.70330984609601	9.62251280827357	9.66716154463355	9.61657719784373	9.53334296962373	9.637011722701	9.68972128453479	9.80825291340781	9.80902632626555	9.83563471467782	9.88484645567324
TraesCS2A01G468300.1	8.49740580908459	8.20288564513004	8.42915324815322	7.17124774262349	8.21303951495637	8.34726195099871	8.46890256222977	7.48565948990085	8.56406892211358	8.47812117059274	8.57009871630153	7.85574842425414
TraesCS2A01G468500.1	7.4916357101821	7.25197585803957	7.51455169947371	7.88759875595913	7.78583743050774	7.50548047926984	7.69884649272608	7.92790772565	7.38418314714802	7.51077180332584	7.39817114544757	7.97673191911961
TraesCS2A01G468800.1	9.87064834603691	7.64408251267621	9.7782965515994	9.99305963139797	7.51862454915803	7.61858794416647	7.48895921128285	10.1045192363473	7.66807186508423	7.7414073343864	9.8788519582346	10.1107379630378
TraesCS2A01G469000.1	7.71582751612092	7.85935934096168	7.72847770125114	8.38505672119572	7.96124217743953	7.74725892030409	7.75936819140212	8.33805557782409	7.84688404251536	7.4597349996204	7.48699507953419	8.47638197365989
TraesCS2A01G471300.1	8.29299617320558	8.15577493544679	8.28280393538355	8.16750954174522	8.33119081667616	8.28108238835778	8.26637006281989	8.3348144688664	8.49036242344387	8.41672465339799	8.46328518250464	8.42781645764625
TraesCS2A01G473000.1	9.03964650236529	8.98887924979402	9.022185728067	9.01906014421138	8.97901887701581	8.96324538857526	9.02749860007148	9.06629809770544	9.01761215665155	9.02770635537536	9.03688399217751	9.06279950168553
TraesCS2A01G473600.1	8.26751955245176	8.26433773379033	8.26886539681606	8.38564011219259	8.10194470107117	8.04760579448689	8.09694999684005	8.29469059770578	8.23632589235701	8.26832804888592	8.32346795714038	8.51011572195797
TraesCS2A01G476600.1	8.15637181263622	8.08736341632524	8.05696947363621	7.81179076819815	8.38269269429869	8.2636456286625	8.21796167743359	7.56588862471111	8.3029532073918	8.25618334252117	8.21547625055136	7.216759477491
TraesCS2A01G477600.1	8.03749029075254	7.93924309590004	8.03605363205698	7.80695712073882	8.11494614846884	8.04952584918244	8.14508353149285	7.99618769119972	8.02791966529868	7.98111060450444	8.03375202397081	7.83721312037339
TraesCS2A01G477700.1	8.55114520219508	8.49928708345954	8.52773897825258	8.1789646858483	8.57670360337589	8.58317038874124	8.62493430248735	8.25033110742694	8.58215857762813	8.59314491593731	8.68284069062827	8.15171779689892
TraesCS2A01G477900.1	9.4282994924579	9.36844654751385	9.40087657847899	9.38040618374723	9.45742196093038	9.38689110070724	9.4363448037782	9.42453793077586	9.40905823517324	9.40079845776372	9.40538912383157	9.39663265238853
TraesCS2A01G478700.1	8.41797409675244	8.32139205253683	8.31604460789187	7.32532002487472	8.38629974950593	8.34835136696164	8.29928507916262	7.61713786117555	8.40222473515512	8.33403111976278	8.36751135909395	7.79247054844665
TraesCS2A01G481300.1	7.33933971777822	7.60904272893488	7.34453908549464	7.58249427480081	7.82899683896098	7.77311897303637	7.79663780584527	7.81687122698213	7.70722785021634	7.57052966841209	7.65369121784662	7.75924379784963
TraesCS2A01G481400.1	8.53773042564068	8.548566085116	8.53005603902772	8.39221398919345	8.82773998105734	8.81668717039708	8.86378876038049	8.62032122856888	8.79442901083248	8.63543358653651	8.7090672070433	8.48075204837174
TraesCS2A01G483100.1	7.92183068516888	7.86702400844011	7.83099583829229	7.66980773729803	8.20358990556696	8.15607421876548	8.23811252075732	7.90006489757059	8.1178743332303	8.05459097589188	8.10385949626415	7.94332412993447
TraesCS2A01G485400.1	9.61733917405511	9.49056640731721	9.54981237218465	9.52906946432744	9.60206962383016	9.53871513089186	9.59562383627343	9.58450790950483	9.64525794746752	9.55264596636001	9.59928240244817	9.68484197928103
TraesCS2A01G487400.1	7.10725877606907	7.49776645499607	7.35523751400354	7.44979966964767	7.54504560836386	7.70436930476699	7.2201753266065	7.55714668984745	7.75556392570344	7.29945817003126	7.67809981857738	7.46978629973424
TraesCS2A01G487500.1	6.04077170760009	5.74985814153935	5.7555577712691	7.13421335009812	6.10878807869376	6.79941071171	5.89783314876746	7.2242701442665	6.7588970247717	6.78179777885154	6.59850241581075	7.78257429156261
TraesCS2A01G487900.2	8.83423966449666	8.80758446079498	8.81329311908278	8.7568385186548	8.77218836921111	8.7420721719866	8.79363215701822	8.65109516511463	8.8115718111507	8.82417719286275	8.80215866459211	8.75676905806183
TraesCS2A01G488000.1	7.65803345294228	7.33789601868326	7.57060312230648	7.90396396288567	7.71799028819054	7.63867239778419	7.41706275497484	7.89663455953157	7.35955008065261	7.38996496513812	7.49371985818815	7.89104241631853
TraesCS2A01G488300.1	7.65407793855298	7.69716212046148	7.73814071813868	6.18150558728853	7.81882665394873	7.20460953405164	7.69279869988112	7.07006696721118	7.86291574822033	7.26482757599035	7.85013103273338	5.91925923000071
TraesCS2A01G488400.1	7.72571386347746	7.73230832894351	7.84528438433939	7.40766959661515	7.68515665755015	7.76263741058991	7.86010675553693	7.4594010792618	7.6918725829818	7.67098071492781	7.73195451206762	7.30385142835827
TraesCS2A01G488900.1	8.41660145200127	8.39693682211438	8.26956707812972	8.17355711543873	8.56651125607738	8.40832247390899	8.48901152273568	8.36663151153126	8.41720550621952	8.28376449977267	8.25361193139305	8.32039976684225
TraesCS2A01G489600.2	10.4501366392348	10.3687735606257	10.3842967245188	10.3641147806777	10.4122417845414	10.4297084201489	10.4266176773209	10.4271132182993	10.4974618262975	10.4561493497404	10.4951401439319	10.4599067995743
TraesCS2A01G489700.2	8.89806493905841	8.84882624920203	8.91467768788467	8.72574523270306	8.81514521874667	8.84128390096486	8.83430497096073	8.64941554051665	8.89411258581574	8.83069128302219	8.89511814136906	8.67386067138615
TraesCS2A01G490200.1	9.0655423569399	8.97830617790026	9.03229431795869	8.94073709288105	9.09434257503529	8.97594510238381	9.08141542160252	8.96279774823275	9.08980594050885	9.02904530918205	9.10024141230585	8.86835699600716
TraesCS2A01G490900.1	7.89890770197654	8.61250094071845	8.18915798514449	7.9573273279378	8.6951401222677	8.74087496456487	8.59190317094053	7.8899850604551	8.42855606902875	8.40207137746914	8.45226757760495	7.9224715789036
TraesCS2A01G492400.4	8.7188258503303	8.72129801588865	8.74578023939432	8.69462697880086	8.60072138180317	8.60432454595036	8.64481474148392	8.63947103000709	8.7103303529993	8.62544790883488	8.6901229512947	8.66452370959442
TraesCS2A01G493500.1	7.89409573088583	8.74667841626912	8.81676228035679	7.95542842016659	8.64072355286508	8.67124954828949	8.69912170980038	7.37861448365669	8.65149019696029	8.64523971505219	8.66038250074474	7.50890321742763
TraesCS2A01G493600.2	10.5502491905188	10.4447969275107	10.4746124140317	10.4630974772061	10.5140697182805	10.5125525442082	10.5115896265771	10.4898277286446	10.5818287165587	10.5503517205741	10.5817379542538	10.5372742365159
TraesCS2A01G493700.1	9.95569692240507	9.8712646705038	9.91484906131824	9.77869527700503	9.91733816682666	9.88842589676556	9.85642687410112	9.82739977261279	9.93448398299442	9.88730340114928	9.92686592179145	9.88430918672857
TraesCS2A01G495800.1	8.72667356799269	8.74767276450567	8.71193843787798	8.59379530653941	8.81923035595971	8.78916691502082	8.80836401257881	8.72333020077911	8.71558980737837	8.6965862785208	8.69351251216532	8.58347601184204
TraesCS2A01G497200.1	8.13002382298036	7.96930208952002	7.96556926189204	8.16142080906633	8.10736522009315	8.35856438978947	8.1926731864153	8.2592682679007	8.34079604200411	8.44431930578788	8.32211602469694	8.27490639963114
TraesCS2A01G497600.1	8.14731142998114	7.90463082812702	8.14468954104374	8.19541402770352	8.04908638352727	7.84669748057336	7.92048328756463	8.11178609134095	7.94341774114103	7.7820542762656	7.7348685523615	8.1620355893095
TraesCS2A01G497700.1	7.77622529877968	7.78794894196561	7.87981263415089	7.94202552711197	7.83808045714569	7.98340638079888	7.82881541627819	8.00639831408936	8.03889771174995	8.0403999685044	7.99559138470235	7.75470435134515
TraesCS2A01G498600.1	9.41195322725281	9.35202512998465	9.36356606739028	9.27249955386687	9.4865263371068	9.40382571735027	9.44869351572707	9.28816791673852	9.38137534068344	9.36092287941079	9.39003639538459	9.22891927122276
TraesCS2A01G498900LC.1	10.0618735811927	10.1393380869118	10.1166321408716	10.0191729154885	9.90494287004148	9.91456289131994	9.9903935597838	9.90368015779379	10.1717598899398	10.2381009763172	10.1186994400208	10.2487115558566
TraesCS2A01G500400.1	10.1438508320319	10.2090485928624	10.1346191953727	10.1548546661411	9.95146442740841	9.93642539580357	10.0409017472912	10.0189725376262	10.2306454553792	10.1840886137714	10.1935122323977	10.3086287580066
TraesCS2A01G501400LC.1	8.52511957150986	8.64266781587729	8.68244178143169	8.3831534209643	8.56419580885425	8.56141008008152	8.52724912014651	8.27358292458538	8.4772725858696	8.61206526889218	8.51040322387875	8.49320930079975
TraesCS2A01G501600.1	8.54000484013855	8.58271260798184	8.57497024631532	8.66522593584587	8.55181098041189	8.59647604809664	8.62292198328045	8.5437168387558	8.56755894308982	8.52681692685504	8.59121913766861	8.55310131196764
TraesCS2A01G502100.1	7.64102888943251	7.66812350548374	7.70770837423024	7.32590125035459	7.29894071299722	7.41983736112483	7.47513631785224	5.87294931492498	7.78013683042083	7.79868216498195	7.86682740114392	6.60501324118365
TraesCS2A01G502200.1	7.54304402884073	7.55934880488682	7.78048826257256	8.06410985887239	8.16455602318329	7.76272920650231	7.62495315087887	8.07519919064814	7.71501364358404	7.78630522512684	7.77736961775233	8.05793646620086
TraesCS2A01G502400.1	8.7236380043483	8.49541747463823	8.66797927062978	8.81292089322773	8.74909026435467	8.69878870310909	8.47388506339716	8.70497664170106	8.62348936189807	8.71853639349398	8.42623184677172	8.95209124340678
TraesCS2A01G504300.2	8.38558049840022	8.41816816210225	8.44612212067036	8.31924277123854	8.24472830751908	8.33270961913391	8.31728458163493	8.13757250880087	8.70051123718242	8.68804884935051	8.72475087830071	8.42861065243129
TraesCS2A01G504600.1	8.84881203564852	8.74236478051864	8.8240059697474	8.71785012236607	8.67891996457834	8.77048430827643	8.85258796187704	8.72013048329804	8.75923414382243	8.7219900887521	8.81991843429917	8.61928754549071
TraesCS2A01G505800.2	8.6794881648575	9.02767005314525	9.0392772212821	9.11391542773604	9.17657050527575	9.07122046191012	9.02917401101827	8.93426439600658	9.03766864711669	9.05995709122942	9.05139397061549	8.91185141626831
TraesCS2A01G506400.1	6.98432693602472	7.24718886772466	7.1036084805868	5.87951567972141	7.19403888855973	7.19845563504222	7.1120601624597	5.81654985964192	6.99106434448637	6.86373546180643	6.85974813638933	5.69028439003721
TraesCS2A01G506900.1	9.43950579601577	9.44559631462143	9.46702795222602	9.34021083814485	9.47500711245873	9.45828715053346	9.43790904717953	9.2012710443742	9.40816612970403	9.44049850458737	9.3955384603341	9.13747875444464
TraesCS2A01G507400.2	8.11456177569521	7.67865869670181	7.6878706438047	7.68724846809363	7.64076712214577	7.72111723247755	7.73761085556875	7.43449588718425	7.9847072120256	7.95043685837179	7.9777036584484	7.75163306205171
TraesCS2A01G507500.1	7.29961755107606	7.38744477819189	7.25438478792888	7.33696470673718	7.06037016077867	7.08996146555392	7.31414564241721	6.61649184972402	7.31645328611299	7.39747266368812	7.38602499987708	7.31751126697388
TraesCS2A01G508900.1	9.57910231496883	9.50947420476598	9.52604865152604	9.50443577536565	9.515476481264	9.46823982571227	9.45121489900236	9.44814112817407	9.63148089823695	9.60119599164991	9.62617607621654	9.5943704493331
TraesCS2A01G511900.1	8.18843579754661	8.04431273210311	8.17950197891377	8.24234797455764	8.19268649360371	8.15778088912467	8.25267334238958	8.29272984150743	8.16804868666329	8.15243583813179	8.28226619575251	8.15966572471002
TraesCS2A01G512400.1	7.49822935839054	7.44960934401371	7.19424355824611	5.84957020882113	7.52821026888041	7.66826343686129	7.43405523200277	5.74900358354169	7.47468400932644	7.58199837091632	7.59395449124945	6.91743259584266
TraesCS2A01G512400LC.1	8.11865905976309	8.00541523585546	8.11065885716982	8.40101218066178	8.29729601131656	8.26165168825305	8.1894808713179	8.50175221979799	8.2122790974639	8.18037159525421	8.23660740372895	8.38749351587585
TraesCS2A01G515700.1	8.43948181333619	8.36749573341703	8.41006825202124	8.4638912380004	8.58358630068905	8.49444545983447	8.53757216408181	8.37641650340051	8.53799356690473	8.49216384574282	8.51960521507748	8.4132208433326
TraesCS2A01G516500.1	8.23551516501828	7.88545456557274	7.83007343324687	8.04444247782015	8.50319654629032	8.03003141070072	7.71429728207442	7.55245569522738	8.53517538691725	8.07564100230664	7.94338998262164	7.98892278472731
TraesCS2A01G517100.3	7.98330886860754	7.77975732811356	7.76770183000019	8.00155218382352	7.716851847147	7.84233990850738	7.8826489728228	8.03159542644186	7.80748357713491	7.8639467140877	7.84810451669808	8.03390950976256
TraesCS2A01G517900.3	7.8917409082569	8.08743237392709	8.14338260555845	8.05308358617788	8.00069395669885	7.86884123230081	8.00973361826619	7.95980361828777	7.92463639691984	8.24820851349875	7.82145095869123	8.14063939104694
TraesCS2A01G518600.1	7.34549038718196	7.50693045339836	7.2327574559722	7.38718754986686	7.07846237214498	6.92348684148276	7.50580057075748	7.67724930584762	7.00935836580752	7.11172520744973	7.11428800895571	7.38610325069379
TraesCS2A01G519900.1	7.42188932339065	7.54517648268768	7.47893401398412	7.07202991822967	7.42775220322599	7.40922879433084	7.48171275333967	7.12899908214905	7.4981589022932	7.35380906280142	7.46140526896355	7.02555233082746
TraesCS2A01G520300.1	8.48488670940439	8.58230291163797	8.56028673350983	8.46574220688849	8.69346174704324	8.47561275242276	8.51828173382473	8.57245366746389	8.46390937073993	8.57606991959668	8.4435736168217	8.54130273868178
TraesCS2A01G520400.1	8.8399224469468	8.85691104328967	8.80786485660131	8.86670324557046	8.75297705580923	8.8015831106044	8.76627323959999	9.05548513574853	8.85012155487587	8.86580668334029	8.84359939351622	9.0469890841977
TraesCS2A01G521900.1	8.28191513197893	8.26628394128629	8.2214663457688	8.14933948458016	8.32424306092655	8.24193152158451	8.08226108284165	8.23681094938525	8.31664691484935	8.27178244442563	8.25179192710068	8.29118723213807
TraesCS2A01G522400.1	8.14601332342152	8.00805191622317	8.01421278200224	7.52503865369317	8.14122118659338	8.11438628877711	8.07468063649826	7.38575490181132	8.11836752955024	8.17356593986857	8.14369799866819	7.57623451026614
TraesCS2A01G523600.1	7.57909771358547	7.54103613179719	7.51869426583598	7.37718882785316	7.52143862075652	7.23564120591217	6.7620834000944	7.69343572256915	7.42791630549036	7.44053165253169	7.40711494494829	8.00802577169492
TraesCS2A01G525500.1	8.43528534268386	8.31782384669814	8.43356900792993	8.2797994369073	8.44811999453253	8.37165042612285	8.30754305632552	8.22759720262605	8.351912966821	8.19291962072555	8.1811574259584	8.18485366321599
TraesCS2A01G526400.1	8.39299845567771	8.39931546107817	8.4469303833192	8.28152996880763	8.43070489117522	8.37311586846071	8.49092114027013	8.42103980972344	8.34653560758167	8.27297717491282	8.37582009394856	8.32522164667055
TraesCS2A01G526700.1	8.50034616661652	8.50806640398683	8.48476814535612	8.40913062754263	8.54278570855885	8.57395954072442	8.54665210691593	8.39422744762457	8.39381031724584	8.45490414557812	8.40725046354963	8.3517460707063
TraesCS2A01G528900.1	8.01236794382049	8.02265388987089	8.03922607219977	8.10551208708155	8.11737227924436	8.19298823501583	8.13713078021246	8.03495158950711	8.08371143294237	7.95772339523637	8.05532539472688	8.02077490819104
TraesCS2A01G529900.1	7.99639182942549	7.59279842003225	7.8045048538634	7.81724051425349	8.02793951728092	7.95056331354729	7.8919602277741	8.02935120289698	8.02991553539481	7.9107556593683	8.01076756795864	7.94379267979323
TraesCS2A01G531400LC.1	8.90632357886152	8.85499049880419	8.87628818743726	8.7633327090996	8.80031887341725	8.81649563737203	8.82414934148478	8.86727400331143	8.93884415826311	8.91526677884373	8.9374080147242	8.96034296958437
TraesCS2A01G532800.1	8.51804150335949	8.45498665918099	8.42086907165294	8.28385702683671	8.76489972811039	8.4916072358393	8.43711970451061	8.02226583531524	8.40136972433523	8.16585244563739	8.12610690896108	7.77513890588816
TraesCS2A01G537100.1	9.35393023915531	9.40186524042243	9.3147791621827	9.29988308948477	9.32771511715948	9.3556087497776	9.25660924790452	9.36349365829835	9.25193291943912	9.29776592837166	9.27253481547855	9.30183073597055
TraesCS2A01G537800LC.1	7.34820510621471	6.91484014200771	7.26158491148546	7.67351527902842	7.25310200352273	7.59280742179455	7.08177770952748	7.5847622062457	7.54159608588764	7.70326573483291	7.26684664702172	7.93670209507412
TraesCS2A01G543000.1	8.06871757821034	8.04339109404745	8.09956673215408	7.88985004559351	7.95446056855858	8.01882320141545	8.03115702368784	7.53271492834182	8.1249154658025	8.11754597906371	8.14414746804239	8.06804186952043
TraesCS2A01G543500.1	7.71378569295408	7.91372557453556	7.62700265439497	7.92969907742451	7.32394882870106	7.49361890836565	7.35192514721528	8.03264811854169	7.62420009135869	7.79949894472459	7.69209229793863	8.17793140382289
TraesCS2A01G543700LC.1	9.15011241997525	9.17503371207987	9.13571369706723	8.98015700145022	9.17936914397524	9.13449599373846	9.10710211329577	8.86738934761286	9.1882360894554	9.03417265920076	9.13183831554328	8.84585361532413
TraesCS2A01G543800.2	7.77316601478511	7.8256890274789	9.96731661639734	7.40176922357599	9.74977173281942	8.20267678962518	8.17160484767718	9.73328436693376	7.6938674376146	7.73720466030392	7.70164833878988	10.0683130128657
TraesCS2A01G543900.1	9.11176025190808	9.02129446032487	9.07185412932416	8.88923435326172	9.14918334273961	9.14532314714305	9.13882378719851	8.81469573315677	9.05505036364546	9.0033915609031	9.06240550644227	8.75066439923888
TraesCS2A01G545700.1	8.10954927823275	8.17800374779524	8.16471750494413	8.30546061341487	8.0403675805196	8.10159238981614	8.01799358018842	8.45043368828227	8.01945989319679	7.85746468576794	7.97293594721404	8.45988142375646
TraesCS2A01G548000.1	8.75002453579752	8.79157560679281	8.79086635075954	8.64918077429667	8.7885515178575	8.80629568819271	8.80522335321144	8.64476409657838	8.78010692778523	8.7890234438034	8.80039443772957	8.61323840605682
TraesCS2A01G548700.1	8.69659006054547	8.44751176623923	8.55640517275763	8.52391569815094	8.71662039968616	8.38193757985458	8.47334069469534	8.50688005970098	8.65039920021675	8.43292624207733	8.5461093585209	7.84425616454509
TraesCS2A01G549200.2	7.11764707134522	7.37263184895173	7.29491641191969	7.39307338906992	7.31589853883683	7.38000901586899	7.37026692756349	7.02356699244016	7.06412699305004	6.95115157635224	7.10959496790141	6.92437711439037
TraesCS2A01G549500.1	8.98309907914968	8.87396092443491	8.94870259056538	9.09774890136657	9.00165580448982	8.77127663053242	8.83668025329847	8.94459004880589	8.88465456175204	8.90241617369962	8.81394667977398	8.92370373184248
TraesCS2A01G549700.1	7.46830846674257	7.89962588692498	7.38119638333396	7.43100966456941	7.84919107519074	7.42358844734187	7.34723391109692	7.2022125284023	6.604036565726	6.64727170595185	6.96543548768209	6.31063758725294
TraesCS2A01G551300.1	8.19884088715579	8.13072320546206	8.26100675440247	7.85343237869147	8.20614517590888	8.33046648132092	8.0294024687675	8.10475329973995	8.23076550249218	8.28385184199698	8.23657523201961	7.80210535606768
TraesCS2A01G552000.1	6.2251647282699	7.18513583743406	7.29812363899612	6.5044804880328	7.31830590967906	7.35219442401109	7.45528871326543	7.25810662737196	7.48511274186577	6.75562909553766	7.06247427860886	7.49023631530149
TraesCS2A01G552800.1	8.87049702610576	8.84985321431306	8.84235589219437	8.82352120715784	8.85046536784814	8.84530607877155	8.86912472537619	8.94642322706667	8.85330588907375	8.83452165085066	8.85646749363016	8.94644067031123
TraesCS2A01G553500.2	7.71281111204991	7.69122182878392	7.69850046815996	7.76168972504213	7.77929891475875	7.69696986630495	7.73200776571853	7.83148661462996	7.63191433828231	7.4872781462879	7.62576086455175	7.82251955770589
TraesCS2A01G556900.1	8.34615155713101	8.37789617498609	8.31877479597358	8.05382173793672	8.62177183364743	8.40546848667579	8.38356909090997	8.1514446650627	8.63295809697592	8.46677303321287	8.44809823482467	7.97546118769414
TraesCS2A01G558100.1	7.99721855507995	8.12252260338433	7.87871754365302	7.82182421686305	7.798795636712	7.74646150716493	7.92371637704675	7.8264359212139	7.90595079714892	8.02251790900307	7.80577505484138	7.74609417688632
TraesCS2A01G559500.1	7.76086572659293	7.79774775586036	7.73459738006246	7.71708125985916	7.89109049663314	7.69155826814474	7.60211399156506	7.70221636765632	7.74411684657389	7.63563768018036	7.75774594264964	7.8461750276318
TraesCS2A01G559600.1	6.25643512542882	5.59551397277115	6.292461876123	6.94042228325506	6.1126516886676	5.59551397277115	6.248308849167	7.33300076249767	5.59551397277115	5.59551397277115	5.59551397277115	7.10655360965754
TraesCS2A01G560300.1	7.44541626354386	7.44857676048542	7.42694776144844	7.89548498949983	7.28077903759195	7.36565862440268	7.30501985903232	7.8892135954462	7.52152146603321	7.50056977200496	7.6376774634187	7.66699507055881
TraesCS2A01G562400.1	8.19943766914264	8.13779420454968	8.27569380217058	8.15971160680453	8.15082025071053	8.2473494014889	8.32071895371081	8.25802262702751	8.36787856007109	8.29205511682926	8.31419901069733	8.32284737681985
TraesCS2A01G562500.1	8.3086907169281	8.29742632224724	8.33630543099062	8.24493974243047	8.50051259709333	8.45671557629181	8.47870499827725	8.48602230647131	8.40847064071395	8.4866018074397	8.4260087569038	8.25385770673358
TraesCS2A01G563100.1	7.39578901357287	7.29917323839131	7.31741818445741	7.56352475268747	7.1164774490293	7.2339925668372	7.20759189551863	7.48636931842193	7.50724371060561	7.53183055578337	7.52357092047493	7.89631281707386
TraesCS2A01G566700.1	8.68490340025211	8.50065501523784	8.56899748409228	8.6176330124371	8.66190938855839	8.62177444659716	8.64405224861719	8.82645415833658	8.68128774748221	8.67590487458063	8.68725872707204	8.77235652827317
TraesCS2A01G567900.1	6.49059077131973	7.31239378326012	7.2884920291	7.62318535264974	6.95410036645103	7.29682943057763	7.19222977767443	5.78639886028901	7.29000007737321	7.04828161794404	7.26019842407333	6.74151258235801
TraesCS2A01G568000LC.1	8.90225678819173	8.82975402201718	8.8540364898009	8.73512785675952	8.89525344450241	8.92972215363256	8.90621642483778	8.80604316406791	9.02601231854144	8.99125430828714	9.01859011841753	8.82425535306035
TraesCS2A01G570700.1	7.42341949844324	7.16344663751246	7.37023065682682	7.22233095139178	6.85302197342004	7.06992229824453	7.23474737703348	7.40979508799917	7.4498162961597	7.43978620166247	7.53256491089788	7.63807248189906
TraesCS2A01G571300.1	9.25786930865075	9.04984288057867	9.13871299955074	9.04958169999743	9.04151247708762	8.94931650288759	8.8950401665194	8.90746823720536	9.38876138628488	9.26107078926304	9.3261468446118	9.26720633932734
TraesCS2A01G573900.1	8.8930233355563	8.83658088904132	8.94909109796936	8.15187739141234	9.23629377581224	8.86693069318321	8.82723596296622	7.55685586719463	8.94625716554755	8.68149025891181	8.49543350136611	8.07933552042828
TraesCS2A01G574400LC.1	9.61185204463717	9.32532679271637	9.39187481701407	9.693444962447	9.60556870492752	9.02010518305859	9.78455126172317	9.69241413979422	8.92167615449576	9.04028728611904	8.89965722033643	9.80971838797744
TraesCS2A01G574600.1	7.87656235466878	7.78221726625673	7.85544520226116	7.4531712176221	7.8090127097182	7.77864396452371	7.82047292615186	6.98142464183694	7.95725774066014	7.92819244174957	7.9229670066385	7.50352377740403
TraesCS2A01G575500.1	7.43060983583141	7.54027889865564	7.51240647715595	7.70141739023807	7.49947645103086	7.53598631765658	7.4171073507128	7.40653450457421	7.51807660171411	7.58194562176203	7.49364846359588	7.77225986188436
TraesCS2A01G576400.1	8.66441819258198	8.72952141552047	8.61877433627162	8.62974239731828	8.753786304419	8.81719088355385	8.72556347885915	8.90131734322663	8.6975402957741	8.75165701095627	8.69739066131786	8.77517278603134
TraesCS2A01G576900.1	8.02447135660264	8.20531376443983	8.17357621626498	6.73900869290324	7.59937618159151	8.20853473984943	7.81969303744359	6.11485284552808	8.12038891388919	8.22255843850015	8.12374328575103	7.53652860391498
TraesCS2A01G577600.1	8.80664212331145	8.86225982900856	8.807527293615	8.79711601559169	8.82232529109464	8.80004050773769	8.86646291816279	8.88557775022749	8.68893649392529	8.77189102155936	8.83337697403594	8.86400863507255
TraesCS2A01G580600.1	8.1898438568053	8.14238615701956	8.16329812156016	8.05991275516491	8.19077584775868	8.10259819612184	8.15634364681886	8.06184239737774	8.12795620634583	8.11815808056032	8.13367741401556	8.08990749353487
TraesCS2A01G580800.2	8.51570192049379	8.20824086186448	8.4349303347196	8.53949165789315	8.25510955764116	8.40422074339287	8.45021700724607	8.65318922106871	8.52679140144842	8.50578864445364	8.52398861990443	8.65944354860873
TraesCS2A01G581600.1	8.58248270944666	8.44587327155335	8.48442979394319	8.56182929293424	8.74293904265157	8.72932999869997	8.67271653696201	8.70642636139127	8.62076854702112	8.47245685250666	8.53001245809686	8.52142286278712
TraesCS2A01G582300.1	8.93935051706527	8.83207058457852	8.84003498485241	9.25037672723446	7.57046855868986	7.41999070816542	7.55408077459562	9.3802319831615	7.49786705126128	7.35168279655482	9.20470283888478	9.36013587803535
TraesCS2A01G583000LC.1	9.11096537897558	8.91848074001586	8.93190791129673	8.98505581450786	9.1773831860556	9.22609894691745	9.20468579282033	9.01074258633294	9.21779926833765	9.26003834730939	9.25361660666261	8.80785632626261
TraesCS2A01G583100.1	8.79785715791805	8.79011830668973	8.78006515730631	8.94648507185829	8.93668568469787	8.90935695251437	8.93446682380005	9.09905492498398	8.73767916587377	8.62720130984426	8.76848087791016	8.85365349437009
TraesCS2A01G583500.1	7.09237958186846	6.89578866078717	7.02228530524141	6.96595555439423	7.49791919891525	7.36611072331208	7.30973933393659	6.31188958583032	6.8130414691316	6.87134363842661	6.68972291147377	6.31188958583032
TraesCS2A01G583600.1	7.15179529264581	6.86576855501254	7.02885583436671	6.38440731809429	7.18091170117205	7.3632847323603	7.15011998867508	6.38440731809429	6.98293837853546	7.29656179996057	7.10023879534364	6.38440731809429
TraesCS2A01G583800.2	7.97566984748974	7.87311082281728	7.92826156963053	7.99243095260417	7.90047550621452	7.9205803964002	7.93115828623844	7.76801193265388	7.75235713343897	7.89502463995788	7.75885542994956	7.71355928480941
TraesCS2A01G584800.1	8.68583172248	8.39441323232862	8.31885815345594	8.48012807086109	8.30647085631621	8.63042399058512	8.60138292629088	8.37080915365102	8.37298219688351	8.40649431982141	8.45700475579045	8.43908959674189
TraesCS2A01G584900.1	7.98085421838396	7.89864029050676	8.01570529918279	8.29156063886619	7.89386463189478	6.866144503102	5.94666714977946	8.2750736871399	8.37576041650631	8.04399239518019	8.42896959009498	8.53152657471725
TraesCS2A01G586500.1	8.12778095416735	8.1831557358049	8.13445896377011	8.09209470918133	8.04371110016363	7.91384539335331	8.09643697496232	8.14620963148187	8.04054999191832	8.06766251689461	8.06431061886412	8.40194983977076
TraesCS2A01G587900.1	7.48017872534752	7.4565791931406	7.36694264935802	7.97887928051655	7.78933023533521	7.62214149919299	7.7483792458384	7.94909033150743	7.71714848938612	7.63258080063819	7.69844662429112	8.01819224184517
TraesCS2A01G588300.1	8.17657695339666	8.06284651554782	8.1337142322526	8.17896018878106	8.22303063522306	8.17524268614257	8.28987697546257	8.56158929238925	8.11053226886635	8.09250841762774	8.16051242887424	8.46470538661158
TraesCS2A01G588700.1	7.39535559682416	7.31355249972603	7.47144175758872	7.52553411493447	7.53368779236138	7.55245011363242	7.73768277959273	7.84141479213349	7.43042811526532	7.50895299415814	7.50674119786955	7.70228834169328
TraesCS2A01G590000.2	7.33904317778319	7.6854461875085	7.53797364558547	7.97120924168232	7.90565803060831	7.71101977725527	7.48322341923198	8.01055557964655	7.51382148382863	7.18120464447116	7.33296322351834	8.22936331752384
TraesCS2A01G590600.1	8.81748531390354	8.71610359229625	8.85196979332553	8.77942505532187	8.46880776872388	8.6325138992476	8.72705299250504	8.83993780582766	8.49709209733877	8.56009531892066	8.61119853380859	8.72968234177947
TraesCS2A01G591600.1	9.2720299234444	9.23688499089122	9.21611829570361	9.31944248247153	9.27859294744629	9.2121921708125	9.2557226537323	9.3635525627322	9.24765064033689	9.1571939865476	9.1865477887262	9.26136516220595
TraesCS2A01G591900.1	9.18675964761535	9.19906358007309	9.23959628693323	9.24663970823859	9.21481492910592	9.33841818146827	9.32576235888383	9.34906687476603	9.13112096193344	9.11801358350047	9.03075540950889	9.23847164650019
TraesCS2A01G593000.1	9.58456301404112	9.55978855136094	9.59367460287912	9.48846335611135	9.6088914604458	9.5536246600835	9.57440658249437	9.51529228320975	9.52392530439987	9.48662703512245	9.51067296079686	9.39496898436392
TraesCS2A01G593600LC.1	7.72957926993541	7.49331190171835	7.65463892728347	5.74792898666932	7.67173222887626	7.77921196559345	7.48219279838652	6.32135943144691	7.42341210455196	7.42735886662876	7.77262382665639	5.74792898666932
TraesCS2A01G594800LC.1	9.135980873033	9.33077874290341	9.19502405441162	8.95059668440097	9.26497120312209	9.11653575502362	9.10674030547798	9.02513209819459	9.15295518630905	9.26900958281075	9.03723258925448	8.985400990675
TraesCS2A01G602800LC.1	7.47284383846385	7.68049883965161	7.65311956539187	7.31962264391075	7.80368808739708	7.88013486912856	7.89654908616405	7.41922778193285	7.79624037914254	7.82527290300312	7.85458089967331	7.35209972697053
TraesCS2A01G609900LC.1	8.35734063697912	8.31167588940814	8.37146800325887	8.31526348843845	8.32727676720944	8.36703536506601	8.46960034251626	8.36661839608414	8.3005647039944	8.13402613663504	8.30736680402307	7.91911255071729
TraesCS2A01G646700LC.1	7.60321191604177	7.50063044942189	7.51646052759463	6.77625342469225	7.41515584851162	7.39998398546119	7.48819632922504	7.06616863828774	7.49392070684607	7.54529663561809	7.55658935997578	6.71867596832297
TraesCS2A01G659700LC.1	7.86585314987215	7.65001890915603	7.87058170515242	7.96431253789712	7.445013905084	7.79063632615138	7.73835880481678	7.74464592057212	7.84886913392287	7.82371086621686	6.22816279287752	7.84499638016096
TraesCS2A01G661700LC.1	7.80891190676174	8.12007164500984	8.25813581920949	8.54682836129691	8.39961907980215	8.4061926716226	8.33163942111156	8.50843562005826	8.34451144275335	8.19382694667494	8.1913324379025	8.74141126594685
TraesCS2A01G696400LC.1	10.1479280200946	10.0859101927244	10.0871222050237	10.1071903216385	10.1002807935353	10.094696069742	10.1641321064972	10.202871676757	10.1387406460628	10.1280038913293	10.1360076193005	10.1713636585358
TraesCS2A01G730600LC.1	8.82755106730168	8.7801259724143	8.81152987243938	8.79819238932199	6.52227202705235	5.54534015125745	6.34292571732411	7.43953669603462	8.32778328742464	8.3342172930116	8.3830057836246	8.59777655573773
TraesCS2A01G739600LC.1	9.04201115984707	8.8698701839081	8.94508557039699	8.77997225326881	8.85776097959664	8.83864014501517	8.77879257563462	8.78056228211763	9.2097129643063	9.09146755385938	9.17853266144074	9.01313298567568
TraesCS2B01G003600.1	7.97722627931931	7.92972250219644	7.98309281597374	8.01231957732327	8.13204339019538	7.98223548569973	8.0406452965441	8.20723823984852	8.05570763795274	8.00258028032273	8.09448267955983	7.98343164572438
TraesCS2B01G006700.1	7.95129391621957	7.96735210895304	7.9055824576998	8.07912381187108	7.7062254213968	7.93288628084453	7.78916049379635	7.64091759925574	8.07057392910106	8.01202720254236	8.15828003888722	8.63155053524364
TraesCS2B01G012800.1	8.02725183111143	7.66839042051526	8.04535165850612	8.51830262101616	8.1978926762805	8.04958878132445	8.00567397707198	8.41015383806113	8.0285386140279	7.97631379094477	8.01174228242639	8.10012230852833
TraesCS2B01G023500.1	7.41756133080982	7.50701914049593	7.38330253514249	7.08319978734963	7.71708613820906	7.67644111980257	7.68758636669961	6.75651529454729	7.86828991594606	7.63338681180409	7.78953029749194	7.97870402508509
TraesCS2B01G026100.1	7.23416850838226	6.95051682759245	7.05107290673176	7.20373775870923	7.28390210714456	7.34647637401711	7.31410798617197	7.86360844415621	7.24593512216768	7.22324177074633	7.28738279634379	6.98936139187056
TraesCS2B01G031200.1	8.12999820869263	7.43149721576514	7.49125213770578	7.32700645676887	8.56369070275268	7.97464346634145	7.89273738299092	7.4871186534312	8.20608135883322	7.856119072049	7.88404724484894	7.24960097851105
TraesCS2B01G031800.1	7.07102069695595	7.04898425652999	6.97343654760247	6.9036475089757	6.46180815464179	6.63477427419542	6.89171473263238	6.42282770225429	6.79720328607817	6.80222347837643	6.95309413465742	6.97890619433834
TraesCS2B01G035900.1	6.8398469286964	7.05435216385913	7.08715167788786	5.6562281608533	6.73732160044715	7.06000582026186	7.12887113207035	6.56633331220469	7.23475429936479	7.38953029581713	7.42741031157634	6.5218563507753
TraesCS2B01G037200.1	8.63969113924846	8.65855598005204	8.69889061259336	8.83300595817649	8.39224692344525	8.46299578471718	8.62169696526479	9.0633945495671	8.82320145777856	8.79656071023573	8.89571287857189	9.28181050348024
TraesCS2B01G040000.1	8.91216784573872	8.63183741662611	8.67822384600508	8.67085826928891	9.03514073649996	8.66517309399759	8.68665489595868	8.46126348507947	8.73034590868271	8.44827304889144	8.52514830619208	8.41111593816699
TraesCS2B01G040300.1	6.83164410036561	6.99134462834907	6.98118256888185	7.1708387507177	7.07133067448621	7.11042580558983	7.12449396846038	7.26518255998199	6.21361546096781	6.72448317020775	6.3380759881025	7.12154064269121
TraesCS2B01G040500.1	8.75088449923452	8.3450293742311	8.57115546178482	7.80293204303447	8.96766323207696	8.65791488971904	8.79874554798696	7.96686018869487	8.90971098155278	8.66308876236377	8.88008660012254	7.72133428674448
TraesCS2B01G040600.1	8.77746794293038	8.28891218684775	8.56333607399148	8.41440397922963	9.10860462406314	8.75132822548974	8.91616512848179	8.48200080170146	9.05132630911032	8.80654774386155	9.03028713004301	8.57662258110949
TraesCS2B01G041800.1	7.28386471397726	7.30734796744583	7.42363538074601	6.88357886659146	7.64914512557578	7.59446914270002	7.67127111557347	6.64025919296797	7.5242091070988	7.51587646531023	7.57790325945974	7.09234290476395
TraesCS2B01G046500.1	9.25006723714127	9.27351457710537	9.28506188349482	9.15581691390685	9.14149551269089	9.0624781669613	9.14546649611254	9.10176317877078	9.2768533434426	9.24312552924702	9.26404846514982	9.36420369084435
TraesCS2B01G047400.1	9.96714703944588	9.8554179789977	9.84746304455591	9.81077358169481	9.91542122323619	9.72279481824548	9.89152267139091	9.85982852729919	9.80852697970811	10.009964519481	9.96520731698253	9.81319124478547
TraesCS2B01G047900.1	8.01564204109163	7.69226726755719	7.96127622376073	7.41854749147231	7.69340464673461	7.87113588381312	7.68927255842671	7.28592793902419	8.18737184329992	8.23715335697761	8.24213392912948	7.69625142993237
TraesCS2B01G048700.1	8.46079376733977	8.31889756425131	8.48916828520603	8.10526421112476	8.4129737533232	8.51774093656594	8.31203215585615	8.21582477830945	8.4457596291482	8.56069755885047	8.60399647503772	8.24474961370042
TraesCS2B01G049200.1	8.99608779330118	8.95805908334926	8.93071220227242	8.71180685885488	9.04081272180724	9.00828746551699	9.03893770152794	8.81590897410691	9.01632440852622	8.93374555237586	8.96845824587343	8.74665579782244
TraesCS2B01G050400.1	7.96617001608062	7.72063133731398	7.93351781250688	8.0168314577609	7.84457786204541	7.99449226483489	7.7260492296603	8.11297034875509	7.74239379041144	7.76059262452288	7.86511678588665	7.9108832509888
TraesCS2B01G051000.1	9.00246954215016	8.92437496844598	8.97400131130847	9.07459170140324	8.92182801464015	8.9997143899053	8.96200019351917	9.07494035098801	8.94896044969233	9.11189261798195	8.99630744228473	8.98073701957552
TraesCS2B01G053100.4	8.85375245523603	8.74221255421853	8.80240416720312	8.80655824043093	8.74585586115315	8.89456149181385	8.91533206666064	8.82656315574531	8.83237932687801	8.79915517771463	8.84688015815542	8.65030299713997
TraesCS2B01G053600.1	9.1473917770263	9.1205688640744	9.15107231661444	9.1166952011625	9.12510960879499	9.16530448203458	9.1656559184617	9.1904696835596	9.19349120513258	9.14055373893237	9.13279649432832	9.13881456887533
TraesCS2B01G053700.1	8.69947932357665	8.66013671203272	8.69731973274915	8.50426097352663	8.7535686464246	8.68928101196118	8.7492700836923	8.54837107906803	8.79112601414996	8.76457841951554	8.78292665621758	8.49645002027652
TraesCS2B01G053800.1	8.40671361824941	8.35954026938101	8.39184404492414	8.26724838052554	8.39122645218303	8.36464155899829	8.423696134056	8.348297204299	8.50129572370303	8.4764100224885	8.51417649914387	8.28345383676788
TraesCS2B01G054700.2	8.44446399422158	8.56557192761381	8.5489735814987	8.18688304252598	8.36197738304045	8.42763071428605	8.32861385502662	8.28740520590777	8.41423313425832	8.43457731829517	8.47919350647157	8.38241857423431
TraesCS2B01G062500.1	8.26969902490222	7.74910073062982	7.64092657505866	7.40219199928351	8.69125560004766	8.28706658969612	7.73762268120581	7.23725902811394	8.53387978498523	8.11516472112019	7.98866436518794	7.91731531120199
TraesCS2B01G063000LC.1	9.67206020699322	9.68975716535508	9.68881623132751	9.6730012753307	9.51113662580193	9.57084652738263	9.64502423089779	9.64305356812329	9.69669402746517	9.71412538956821	9.73285494992269	9.82471430771458
TraesCS2B01G063900.1	8.61331947029391	8.41618599874231	8.55176921148768	8.68357631318083	8.62846884408975	8.4523806206536	8.56927912702035	8.12149630714902	8.61947760073435	8.49556593067489	8.62089796588805	8.19336770270881
TraesCS2B01G066800.1	7.93291996573787	7.67005247708937	7.97120642217773	7.61171741282445	7.92818885677959	7.91345032325035	7.95412572592541	7.38431279286834	7.56069010891411	7.61561324469944	7.58229784277452	6.11737223939115
TraesCS2B01G066900.1	8.15125149713381	7.83998673360879	8.2485977952886	7.94138142041495	8.1489833468456	8.16810390010981	8.15565060871041	7.82933675286597	7.7031382382802	7.59124830145749	7.66948063324976	7.48316768354819
TraesCS2B01G074400LC.1	7.68250275650612	7.50059605149171	7.3896011706159	5.7796955537256	8.07193326334758	7.63359951116891	7.49322132433576	6.86843092588021	7.79318502269227	7.70210353233687	7.63957932621424	7.53069497774786
TraesCS2B01G076900.1	8.10121779580078	7.85587281270328	8.02168580351175	8.17108237304284	8.14235510675218	8.10809235291904	8.12395347001424	8.31031090781829	8.05772555532009	8.13733559835668	8.09637931656624	8.08096677240643
TraesCS2B01G077200.1	8.63592682769827	8.57338758194743	8.55803638545906	8.49084894516436	8.50630200632675	8.51512336277738	8.55690971408942	8.51094049305028	8.63388894014689	8.60132248254454	8.61566028402422	8.27774028061076
TraesCS2B01G079300.1	11.1481745930834	11.2276195663721	11.1306914343541	11.2474950761768	10.9922613385906	10.8833154388699	11.0546206907628	11.049516777142	11.0310275878508	10.8049937003912	10.8365693428917	11.4047073900971
TraesCS2B01G079500.1	10.9905410386337	11.0363458942288	10.9690075747748	11.1498714647619	10.8623019212791	10.7332987056347	10.9669852575905	10.9310752002749	10.8114489771269	10.4076824492485	10.5636590444896	11.2874295471392
TraesCS2B01G079900.1	7.65641394249623	7.84879803891766	7.65332957026258	7.2294900648311	7.82015854080856	7.86822598170491	7.83826799274775	7.69278002338634	8.08052973128955	7.99271825867688	8.06939526382554	7.49729459663034
TraesCS2B01G082700.1	8.73927789410035	8.65785011868542	8.75816204970784	8.59092310703369	8.77135959626338	8.71561336961818	8.73906528790263	8.58619526290963	8.77789116821284	8.81605116912668	8.8268289216031	8.60427296764873
TraesCS2B01G083400LC.1	9.13905609667199	9.00164278895707	9.1119525371961	9.12745561562132	9.125443571487	9.13319982347147	9.11728097161116	9.19073484108186	9.14662264585997	9.17273113487579	9.15275139537945	9.1377051251733
TraesCS2B01G084200.1	8.72384157912301	8.64123390797694	8.73718044429972	8.35547236774818	8.81089069916115	8.68631825998008	8.73824646292336	8.47681685506529	8.61876610007383	8.59328142580258	8.62326775297207	8.39828897062638
TraesCS2B01G086200.1	7.38700265603742	6.88820084782596	6.9153353000585	6.58407612160508	7.380629637477	7.76945786087222	7.49807186569579	6.99281878435509	7.79430253217318	7.86590964247125	7.90073355381348	7.49269659855998
TraesCS2B01G087400.1	7.9548363470309	7.80225062666077	7.92347436020243	7.81954448176835	7.82431271082685	8.02605787742119	8.00805447577679	7.93224771892167	7.99445861980793	8.05146527059222	7.96491715987651	8.06279382271654
TraesCS2B01G090300.1	8.68584089602975	8.76575521319005	8.65093713197928	7.44369555010054	8.53692911991222	8.34703277560869	8.44697562866547	9.02462435842016	8.81276120675106	8.83380466210221	8.79813307429957	9.34331245804553
TraesCS2B01G091300.1	8.66556352040864	8.58554560510012	8.67497646123318	8.44552773883122	8.55552266362078	8.54557041937228	8.54024528629607	8.41452108884271	8.53105211061612	8.56598402682206	8.52433942776081	8.62897302537769
TraesCS2B01G093000.1	5.96214922565683	6.07055638469295	7.0853415863867	7.10609450069725	6.73550938173919	6.39388284912671	7.2261391255697	7.61981842572548	7.13925470243508	7.0642813091035	6.64582667870709	7.65990210383856
TraesCS2B01G093100.1	7.07583094673182	7.01512174845902	6.16180030765748	7.10814713065302	8.02921516510506	7.2406753287733	6.8847119643512	7.05595392282679	7.14948003519468	7.05002354151312	6.89401281067069	7.0847791161106
TraesCS2B01G094300.1	9.3931327343623	9.32163470869843	9.33518165989797	9.30843085366957	9.47720669606016	9.38516880089177	9.39213510268167	9.39432135976683	9.41085204664835	9.41289622453393	9.38589423161072	9.27503999613644
TraesCS2B01G096200.1	10.1613304026755	10.0655642724274	10.0983596579896	10.104018783238	10.1524140083744	10.1368430798344	10.1622880159335	10.2424403050994	10.1651234273532	10.1542524184171	10.1245241013961	10.1360338736558
TraesCS2B01G096600.1	7.32657433650409	7.30395084633143	7.23925699085995	8.02574586905272	7.74978113444162	7.44149998839651	7.45386599579643	8.08406707337443	7.36074327290009	7.10801421114567	7.19169028528083	7.95868934124275
TraesCS2B01G098400LC.1	9.70593802743351	9.52151044853557	9.64607540891159	9.61839671064141	9.64430260674679	9.60986479324839	9.56089023466958	9.71070886723458	9.68227070719936	9.68684342532385	9.70901183909059	9.6342286019839
TraesCS2B01G099700.1	7.79654592981231	8.19475933160263	7.87025054701106	8.08527694637542	8.22117187256465	8.26579048791068	8.27725102094614	8.12406926536871	8.25748451142494	8.17419911380845	8.10502563490807	7.77323240340962
TraesCS2B01G100400.1	9.51514475610007	9.4399643528857	9.4427223239366	9.46038234210843	9.46670615883989	9.45936341414764	9.49757804317572	9.58131683621424	9.46616337467415	9.42961864608129	9.4791953474287	9.53764890790515
TraesCS2B01G101700.1	7.81069015310363	7.55424422007363	7.73298828433201	8.47307489796765	7.86445681050154	7.78391578107672	7.7614961229068	8.44075555857082	7.75268750741354	7.64087416119636	7.82667244842872	8.55606022422526
TraesCS2B01G102700.1	8.33294760070941	8.24042539662548	8.32937531571788	8.26465554216233	8.33612417852123	8.28498820257713	8.27641322324211	8.19851433464539	8.45894913226457	8.41213757082594	8.43150837340675	8.34328609578396
TraesCS2B01G102800.1	8.21880167510615	8.13870134737826	8.21339307498509	8.12535092815676	8.20189798341764	8.15449710339489	8.12678604909955	7.73670174093744	8.33834174663616	8.31270991593992	8.33845484771785	7.99470852491825
TraesCS2B01G102900.3	8.55954220290741	8.33662517665725	8.474668313646	8.33974533254101	8.38868896594293	8.36913106964981	8.41651991462087	8.59751769426066	8.4697050843367	8.45953048744489	8.48100914103146	8.48263993344154
TraesCS2B01G103600.1	8.62457887559096	8.56041024602021	8.6215352152117	8.43474082766054	8.5010374579411	8.48190360909802	8.50045637877112	8.32868424195825	8.67888471012415	8.69577986079375	8.68784866263192	8.26675276606463
TraesCS2B01G103900.1	8.50367022500514	8.37531839762496	8.45975282312254	8.51271905539854	8.63718830971119	8.50637092357671	8.52094640430169	8.61608498652524	8.54058659104167	8.39032711436233	8.51803878490898	8.5205920734465
TraesCS2B01G107500.1	8.61909285444146	8.66202014813858	8.62452764436677	8.6198549445361	8.59053283983619	8.70564582857647	8.64091671643441	8.78068571002831	8.38426424494808	8.50491667662876	8.42816137123216	8.66368141315959
TraesCS2B01G116200.1	7.81652377610061	7.82404871732492	7.81445540712911	7.51622190261804	7.50893276414339	7.5840177669843	7.56582101222441	7.49998755099769	7.71200764357744	7.76772915418551	7.86028218078007	7.23054403451979
TraesCS2B01G116300.1	7.80531287591084	7.20586518279045	7.94112280771575	7.60850706974454	8.01978283129855	7.75719406233936	7.84039932114787	7.43280218743531	7.85325444398835	7.83221197143529	7.8666950862964	7.77021229606181
TraesCS2B01G117100.1	8.32778377272573	8.07033080234905	8.28174078770281	9.13666417023806	8.52583368457385	8.23756694293153	8.34933469993982	9.00847199640099	8.12224991963168	8.13049215944426	8.12921036319397	8.5838702803065
TraesCS2B01G118700.1	9.2827761444082	9.2573737686247	9.28544754349098	9.31601852002503	9.30048039172181	9.2913856982312	9.2614240382827	9.26305715419417	9.20360926363026	9.17708748185961	9.20710816625855	9.19615894833923
TraesCS2B01G118800.2	10.0273276734455	9.98639084072868	10.0978049938344	10.043473402078	10.1242884894671	10.054992405614	10.021367291696	10.0275627750733	9.92895515219397	9.9089587932706	9.93180845618977	9.7721615399137
TraesCS2B01G119600.1	8.49845681285533	8.63268325691446	8.52084146464311	8.63163429743271	8.48325398880277	8.57830946252405	8.53343420013961	8.53088004712273	8.63689672646565	8.64276858322562	8.65098690240587	8.63837108991938
TraesCS2B01G122300.1	8.4921392216151	8.54279853494121	8.50061465441728	8.25087450287747	8.45923337142612	8.51551453277836	8.47343459142815	8.03461755886075	8.57213862453897	8.65275464951287	8.52667655044836	8.17143438294856
TraesCS2B01G124600.1	8.43961693383623	8.38472839056118	8.33467875193056	8.2664154967027	8.46467337765781	8.19608029185185	8.21092370287037	8.22893612420982	8.74823812047911	8.47481174790848	8.47150890893179	8.41029790989413
TraesCS2B01G124800.1	8.39811725888761	8.2668277372637	8.28445146791558	8.05091118885344	8.36339498611323	8.08957532292718	8.1577656879009	7.95180157434889	8.64936592412925	8.31491633320314	8.3398396644641	8.23965359543388
TraesCS2B01G124900.1	8.82976413929684	8.78692393994904	8.77279690155514	8.689278094501	8.51858432666091	8.28410944043701	8.35841325875934	8.40883735533826	8.87746774823149	8.69843443640217	8.75228367355967	8.65256703078942
TraesCS2B01G125200.1	7.94779443698801	8.18410981726513	8.03249550970894	7.49767358904245	8.23493148430855	7.67804283096926	8.04100203343488	7.48165810557551	8.20280097916311	7.61068988969857	7.72356218786473	7.25522091136519
TraesCS2B01G125300.1	8.53699027270671	8.51044533418684	8.48049009437321	8.27121385497647	8.60681037933009	8.42355595933327	8.59762469474797	8.19225572805606	8.88387635648343	8.54980313746742	8.60747451997378	8.46026026007609
TraesCS2B01G125500.1	8.39297649077409	8.37548979693628	8.36016682736768	8.30325192028958	8.18182678536931	8.09461366714504	8.16493001875358	8.04933211550669	8.49273990631504	8.37048922116999	8.39231726392149	7.99939807995434
TraesCS2B01G126500.1	8.13989099298839	7.90810001382373	8.1487318562549	8.7404413354119	8.73858694402357	8.58278816219306	8.34199124103086	8.65881895657612	8.32000066909226	8.43343546566014	8.47158464730308	8.41866495273148
TraesCS2B01G127100.1	6.86075221823866	6.78186980127624	6.82372524345167	7.21142568253494	7.33527395371893	6.55214595901173	6.53019137930549	6.45418103530709	6.71299325675034	5.97405535659709	6.64217032023705	6.60737380526767
TraesCS2B01G127400.1	6.38483441127562	6.30939930877748	6.01918375482392	7.08895115140154	7.24686880570949	6.09236110798568	5.88071676619542	6.00285479828504	5.55021117078437	5.9710221155128	5.55021117078437	6.03328892329825
TraesCS2B01G127700.1	8.60564773940488	8.55920634143651	8.57754404977106	8.67495842493899	8.49318594411926	8.50731469061969	8.48539485053796	8.45178029793193	8.58829207699584	8.55059732886648	8.53129867459485	8.58262230590995
TraesCS2B01G129300.1	9.2619141146449	9.24014156713525	9.21136937351761	9.53082690506952	9.24513045797719	9.23818870243085	9.19104576176609	9.60068744120519	9.5289707555437	9.5877646666662	9.56300439787879	9.71174057946206
TraesCS2B01G131100.1	6.17347200607392	6.17347200607392	6.17347200607392	7.62575704258234	7.21811365675822	6.62569790337561	6.9609286691955	7.01552208760766	6.72541682826505	6.28991515944607	6.55934483656003	7.58468899102444
TraesCS2B01G131400.1	8.38578078428116	7.73534990982801	8.26237544388085	8.44972048999864	8.36081285427839	8.37534641739974	7.88341935580516	8.3283817416032	8.45842641738406	8.41886297642527	8.4572464812562	8.43383652640775
TraesCS2B01G133200.1	8.25734363488574	8.23963589829176	8.27404908690477	8.53996885228142	8.67373126412241	8.37949798574814	8.47434108738522	8.59649098491955	8.50768078576245	8.32954908263696	8.51466070784864	8.55191905354211
TraesCS2B01G133300.3	8.68777680676178	8.84530312862191	8.79142028175962	8.71662712783463	8.58311740176537	8.54470007128892	8.58779247581588	8.5244552583502	8.5202322954838	8.59160705456225	8.54805719075791	8.83817305584979
TraesCS2B01G143900.1	8.526705987283	8.55679290800971	8.52209631860446	8.47042769329929	8.31294422521327	8.16291924555197	8.23380382388358	8.36440890822907	8.41642611473088	8.41828852128737	8.37202139875662	8.33508190306187
TraesCS2B01G144100.1	8.86777627738367	8.86342529757389	8.93893630691371	8.85560467210423	8.72509785638537	8.64967760191024	8.766403054273	8.65948559262308	8.92297083012694	8.97989940697109	9.01410323854696	8.97574189396447
TraesCS2B01G144200.1	8.65244209521823	8.63319124275301	8.63967564481367	8.71372456382559	8.27852818409522	8.24353282755496	8.22388993131086	8.45899538563732	8.5135716468307	8.43874462628675	8.43661067508512	8.56591403987562
TraesCS2B01G145700.1	9.25370122518195	9.28397166079742	9.31718002965516	9.11204247217109	9.29089142704845	9.3537450077586	9.28252854480501	9.25790349807374	9.24717905522024	9.26331432941815	9.18923067063046	9.23413510971955
TraesCS2B01G147700.1	9.21544464373822	9.32952002775409	9.26551670458861	9.30071810546325	9.25891444954481	9.28568961006648	9.2621860867794	9.33953079385154	9.20696931174394	9.29332513344026	9.35858990008542	9.28324854290198
TraesCS2B01G148000.1	9.22663949751279	9.09409764647951	9.13415931329833	9.01741432075705	9.20342668822917	9.13918204765137	9.10995869823923	9.08676381909697	9.13842527214666	9.1183320547841	9.05191205697366	9.01303938051003
[truncated: 6,140 more rows]
