# Supplementary material for: Proteomics-Based Data Integration of Wheat Cultivars Facing Fusarium graminearum Strains Revealed a Core-Responsive Pattern Controlling Fusarium Head Blight
Source: Front Plant Sci. 2021 May 31;12:644810. doi: 10.3389/fpls.2021.644810 (PMC8201412; doi:10.3389/fpls.2021.644810)
Supplement: Supplementary Table 7 — Gene ontology enrichment identified in wheat protein clusters. [file Table_7.XLSX]

## Sheet: Cluster_Cv1
Supplementary Table S7. Gene ontology enrichment identified in wheat protein clusters
GoidA	Ontology_sourceB	FunctionC	abundanceReferenceD	abundanceObservedE	abundanceExpectedF	pvalueFDRAdjustedG	abundanceLog2ratioH
GO:0009507	cellular_component	chloroplast	57	7	2516	<1E-100	5.464080
GO:0019538	biological_process	protein metabolic process	65	6	2157	<1E-100	5.052210
GO:0046933	molecular_function	proton-transporting ATP synthase activity, rotational mechanism	79	7	2516	<1E-100	4.993190
GO:0009654	cellular_component	photosystem II oxygen evolving complex	82	6	2157	<1E-100	4.717026
GO:0046034	biological_process	ATP metabolic process	106	7	2516	<1E-100	4.569050
GO:0016791	molecular_function	phosphatase activity	136	6	2157	<1E-100	3.987115
GO:0015986	biological_process	ATP synthesis coupled proton transport	413	18	6470	<1E-100	3.969543
GO:0010181	molecular_function	FMN binding	174	7	2516	<1E-100	3.854027
GO:0016616	molecular_function	oxidoreductase activity, acting on the CH-OH group of donors, NAD or NADP as acceptor	243	9	3235	<1E-100	3.734728
GO:0006979	biological_process	response to oxidative stress	815	26	9345	<1E-100	3.519399
GO:0006096	biological_process	glycolytic process	202	6	2157	<1E-100	3.416367
GO:0006418	biological_process	tRNA aminoacylation for protein translation	250	7	2516	<1E-100	3.331186
GO:0004812	molecular_function	aminoacyl-tRNA ligase activity	270	7	2516	<1E-100	3.220155
GO:0004601	molecular_function	peroxidase activity	833	21	7548	<1E-100	3.179760
GO:0045454	biological_process	cell redox homeostasis	441	10	3594	<1E-100	3.026909
GO:0015979	biological_process	photosynthesis	786	16	5751	<1E-100	2.871230
GO:0006457	biological_process	protein folding	347	7	2516	<1E-100	2.858179
GO:0000287	molecular_function	magnesium ion binding	534	10	3594	<1E-100	2.750848
GO:0051287	molecular_function	NAD binding	331	6	2157	<1E-100	2.703891
GO:0005737	cellular_component	cytoplasm	958	15	5392	<1E-100	2.492624
GO:0009058	biological_process	biosynthetic process	449	7	2516	<1E-100	2.486399
GO:0009523	cellular_component	photosystem II	434	6	2157	<1E-100	2.313027
GO:0005975	biological_process	carbohydrate metabolic process	1827	25	8986	<1E-100	2.298211
GO:0016491	molecular_function	oxidoreductase activity	3280	43	15456	<1E-100	2.236400
GO:0000166	molecular_function	nucleotide binding	535	7	2516	<1E-100	2.233575
GO:0055114	biological_process	oxidation-reduction process	7255	86	30912	<1E-100	2.091120
GO:0003824	molecular_function	catalytic activity	3441	38	13659	<1E-100	1.988931
GO:0020037	molecular_function	heme binding	3055	29	10424	<1E-100	1.770640
GO:0003735	molecular_function	structural constituent of ribosome	2071	19	6829	<1E-100	1.721431
GO:0006412	biological_process	translation	2084	19	6829	<1E-100	1.712403
GO:0005840	cellular_component	ribosome	1983	18	6470	<1E-100	1.706072
GO:0005622	cellular_component	intracellular	1697	15	5392	<1E-100	1.667735
GO:0008152	biological_process	metabolic process	3120	25	8986	<1E-100	1.526141
GO:0004553	molecular_function	hydrolase activity, hydrolyzing O-glycosyl compounds	1195	9	3235	<1E-100	1.436746
GO:0009055	molecular_function	electron transfer activity	962	7	2516	<1E-100	1.387077
GO:0005524	molecular_function	ATP binding	11634	57	20488	<1E-100	0.816446
GO:0005509	molecular_function	calcium ion binding	1366	6	2157	<1E-100	0.658836
AGene ontology ID significantly over-represented in the protein set; BName of the ontology source; Cname of the identified functional categories; DFrequency of the different functional categories observed in the entire wheat proteome; EFrequency of the different functional categories observed in the input set of proteins; FFrequency expected in the entire proteome calculated from the frequency ob…

## Sheet: Cluster_Cv2
GoidA	Ontology_sourceB	FunctionC	abundanceReferenceD	abundanceObservedE	abundanceExpectedF	pvalueFDRAdjustedG	abundanceLog2ratioH
GO:0042026	biological_process	protein refolding	30	7	3404	<1E-100	6.826104
GO:0015934	cellular_component	large ribosomal subunit	114	12	5835	<1E-100	5.677712
GO:0005840	cellular_component	ribosome	1983	59	28690	<1E-100	3.854814
GO:0003735	molecular_function	structural constituent of ribosome	2071	59	28690	<1E-100	3.792171
GO:0006412	biological_process	translation	2084	59	28690	<1E-100	3.783143
GO:0051287	molecular_function	NAD binding	331	9	4377	<1E-100	3.724877
GO:0005622	cellular_component	intracellular	1697	44	21396	<1E-100	3.656300
GO:0006457	biological_process	protein folding	347	8	3890	<1E-100	3.486848
GO:0045454	biological_process	cell redox homeostasis	441	6	2918	<1E-100	2.725967
GO:0005737	cellular_component	cytoplasm	958	11	5349	<1E-100	2.481189
GO:0003723	molecular_function	RNA binding	1214	9	4377	<1E-100	1.850012
GO:0003824	molecular_function	catalytic activity	3441	19	9239	<1E-100	1.424955
GO:0046872	molecular_function	metal ion binding	1333	7	3404	<1E-100	1.352533
GO:0016491	molecular_function	oxidoreductase activity	3280	17	8267	<1E-100	1.333622
GO:0055114	biological_process	oxidation-reduction process	7255	34	16533	<1E-100	1.188343
GO:0008152	biological_process	metabolic process	3120	12	5835	<1E-100	0.903272
GO:0006508	biological_process	proteolysis	2737	8	3890	<1E-100	0.507260
GO:0005524	molecular_function	ATP binding	11634	26	12643	5e-20	0.120020
AGene ontology ID significantly over-represented in the protein set; BName of the ontology source; Cname of the identified functional categories; DFrequency of the different functional categories observed in the entire wheat proteome; EFrequency of the different functional categories observed in the input set of proteins; FFrequency expected in the entire proteome calculated from the frequency ob…

## Sheet: Cluster_Cv3
GoidA	Ontology_sourceB	FunctionC	abundanceReferenceD	abundanceObservedE	abundanceExpectedF	pvalueFDRAdjustedG	abundanceLog2ratioH
GO:0008236	molecular_function	serine-type peptidase activity	133	6	5201	<1E-100	5.289235
GO:0006629	biological_process	lipid metabolic process	544	7	6068	<1E-100	3.479447
GO:0050660	molecular_function	flavin adenine dinucleotide binding	663	8	6934	<1E-100	3.386690
GO:0004553	molecular_function	hydrolase activity, hydrolyzing O-glycosyl compounds	1195	10	8668	<1E-100	2.858688
GO:0005975	biological_process	carbohydrate metabolic process	1827	14	12135	<1E-100	2.731649
GO:0016787	molecular_function	hydrolase activity	1125	8	6934	<1E-100	2.623845
GO:0005525	molecular_function	GTP binding	858	6	5201	<1E-100	2.599683
GO:0005488	molecular_function	binding	1100	7	6068	<1E-100	2.463622
GO:0006508	biological_process	proteolysis	2737	16	13869	<1E-100	2.341175
GO:0016491	molecular_function	oxidoreductase activity	3280	17	14736	<1E-100	2.167537
GO:0003723	molecular_function	RNA binding	1214	6	5201	<1E-100	2.098964
GO:0008152	biological_process	metabolic process	3120	11	9535	<1E-100	1.611656
GO:0003824	molecular_function	catalytic activity	3441	12	10402	<1E-100	1.595905
GO:0055114	biological_process	oxidation-reduction process	7255	20	17336	<1E-100	1.256723
GO:0003676	molecular_function	nucleic acid binding	5286	11	9535	<1E-100	0.851026
GO:0005524	molecular_function	ATP binding	11634	24	20803	<1E-100	0.838458
GO:0016020	cellular_component	membrane	4659	6	5201	1e-14	0.158713
AGene ontology ID significantly over-represented in the protein set; BName of the ontology source; Cname of the identified functional categories; DFrequency of the different functional categories observed in the entire wheat proteome; EFrequency of the different functional categories observed in the input set of proteins; FFrequency expected in the entire proteome calculated from the frequency ob…

## Sheet: Cluster_Cv4
GoidA	Ontology_sourceB	FunctionC	abundanceReferenceD	abundanceObservedE	abundanceExpectedF	pvalueFDRAdjustedG	abundanceLog2ratioH
GO:0004553	molecular_function	hydrolase activity, hydrolyzing O-glycosyl compounds	1195	18	18667	<1E-100	3.965419
GO:0005975	biological_process	carbohydrate metabolic process	1827	22	22815	<1E-100	3.642460
GO:0030246	molecular_function	carbohydrate binding	598	7	7259	<1E-100	3.601642
GO:0003824	molecular_function	catalytic activity	3441	21	21778	<1E-100	2.661994
GO:0016787	molecular_function	hydrolase activity	1125	6	6222	<1E-100	2.467542
GO:0016491	molecular_function	oxidoreductase activity	3280	14	14519	<1E-100	2.146164
GO:0008152	biological_process	metabolic process	3120	12	12445	<1E-100	1.995921
GO:0055114	biological_process	oxidation-reduction process	7255	23	23852	<1E-100	1.717091
GO:0003676	molecular_function	nucleic acid binding	5286	9	9334	<1E-100	0.820253
AGene ontology ID significantly over-represented in the protein set; BName of the ontology source; Cname of the identified functional categories; DFrequency of the different functional categories observed in the entire wheat proteome; EFrequency of the different functional categories observed in the input set of proteins; FFrequency expected in the entire proteome calculated from the frequency ob…

## Sheet: Cluster_T1
GoidA	Ontology_sourceB	FunctionC	abundanceReferenceD	abundanceObservedE	abundanceExpectedF	pvalueFDRAdjustedG	abundanceLog2ratioH
GO:0004470	molecular_function	malic enzyme activity	18	8	797	<1E-100	5.468720
GO:0009073	biological_process	aromatic amino acid family biosynthetic process	30	11	1096	<1E-100	5.191186
GO:0004471	molecular_function	malate dehydrogenase (decarboxylating) (NAD+) activity	22	8	797	<1E-100	5.179214
GO:0006207	biological_process	'de novo' pyrimidine nucleobase biosynthetic process	27	8	797	<1E-100	4.883758
GO:0003955	molecular_function	NAD(P)H dehydrogenase (quinone) activity	34	8	797	<1E-100	4.551182
GO:0008641	molecular_function	ubiquitin-like modifier activating enzyme activity	59	13	1295	<1E-100	4.456442
GO:0008237	molecular_function	metallopeptidase activity	53	11	1096	<1E-100	4.370156
GO:0016620	molecular_function	oxidoreductase activity, acting on the aldehyde or oxo group of donors, NAD or NADP as acceptor	49	10	996	<1E-100	4.345864
GO:0016810	molecular_function	hydrolase activity, acting on carbon-nitrogen (but not peptide) bonds	43	8	797	<1E-100	4.212381
GO:0007010	biological_process	cytoskeleton organization	44	8	797	<1E-100	4.179214
GO:0006108	biological_process	malate metabolic process	44	8	797	<1E-100	4.179214
GO:0004630	molecular_function	phospholipase D activity	42	7	697	<1E-100	4.053683
GO:0046470	biological_process	phosphatidylcholine metabolic process	42	7	697	<1E-100	4.053683
GO:0006464	biological_process	cellular protein modification process	50	8	797	<1E-100	3.994789
GO:0008536	molecular_function	Ran GTPase binding	64	10	996	<1E-100	3.960573
GO:0016627	molecular_function	oxidoreductase activity, acting on the CH-CH group of donors	62	9	897	<1E-100	3.854374
GO:0006631	biological_process	fatty acid metabolic process	71	10	996	<1E-100	3.810826
GO:0006807	biological_process	nitrogen compound metabolic process	72	10	996	<1E-100	3.790648
GO:0006221	biological_process	pyrimidine nucleotide biosynthetic process	47	6	598	<1E-100	3.669019
GO:0005874	cellular_component	microtubule	53	6	598	<1E-100	3.495687
GO:0006099	biological_process	tricarboxylic acid cycle	68	7	697	<1E-100	3.358537
GO:0051082	molecular_function	unfolded protein binding	241	24	2391	<1E-100	3.310718
GO:0008236	molecular_function	serine-type peptidase activity	133	13	1295	<1E-100	3.283803
GO:0016773	molecular_function	phosphotransferase activity, alcohol group as acceptor	138	13	1295	<1E-100	3.230561
GO:0036459	molecular_function	thiol-dependent ubiquitinyl hydrolase activity	136	12	1196	<1E-100	3.136145
GO:0010181	molecular_function	FMN binding	174	15	1495	<1E-100	3.102592
GO:0003779	molecular_function	actin binding	135	11	1096	<1E-100	3.021261
GO:0051287	molecular_function	NAD binding	331	26	2591	<1E-100	2.968398
GO:0006457	biological_process	protein folding	347	27	2690	<1E-100	2.954741
GO:0016579	biological_process	protein deubiquitination	155	12	1196	<1E-100	2.947483
GO:0051539	molecular_function	4 iron, 4 sulfur cluster binding	82	6	598	<1E-100	2.866056
GO:0008061	molecular_function	chitin binding	82	6	598	<1E-100	2.866056
GO:0006032	biological_process	chitin catabolic process	96	7	697	<1E-100	2.861038
GO:0004568	molecular_function	chitinase activity	96	7	697	<1E-100	2.861038
GO:0016998	biological_process	cell wall macromolecule catabolic process	97	7	697	<1E-100	2.846087
GO:0007017	biological_process	microtubule-based process	84	6	598	<1E-100	2.831290
GO:0006418	biological_process	tRNA aminoacylation for protein translation	250	17	1694	<1E-100	2.760324
GO:0005783	cellular_component	endoplasmic reticulum	121	8	797	<1E-100	2.719782
GO:0004812	molecular_function	aminoacyl-tRNA ligase activity	270	17	1694	<1E-100	2.649293
GO:0005737	cellular_component	cytoplasm	958	59	5879	<1E-100	2.617407
GO:0008299	biological_process	isoprenoid biosynthetic process	104	6	598	<1E-100	2.523168
GO:0030170	molecular_function	pyridoxal phosphate binding	373	21	2092	<1E-100	2.487931
GO:0016597	molecular_function	amino acid binding	108	6	598	<1E-100	2.468720
GO:0006096	biological_process	glycolytic process	202	11	1096	<1E-100	2.439865
GO:0003993	molecular_function	acid phosphatase activity	134	7	697	<1E-100	2.379911
GO:0006869	biological_process	lipid transport	156	8	797	<1E-100	2.353243
GO:0003824	molecular_function	catalytic activity	3441	172	17138	<1E-100	2.316298
GO:0008152	biological_process	metabolic process	3120	153	15245	<1E-100	2.288703
GO:0051536	molecular_function	iron-sulfur cluster binding	204	10	996	<1E-100	2.288148
GO:0016614	molecular_function	oxidoreductase activity, acting on CH-OH group of donors	252	12	1196	<1E-100	2.246328
GO:0016787	molecular_function	hydrolase activity	1125	53	5281	<1E-100	2.230856
GO:0006886	biological_process	intracellular protein transport	456	21	2092	<1E-100	2.198073
GO:0016616	molecular_function	oxidoreductase activity, acting on the CH-OH group of donors, NAD or NADP as acceptor	243	10	996	<1E-100	2.035761
GO:0004222	molecular_function	metalloendopeptidase activity	196	8	797	<1E-100	2.023935
GO:0008171	molecular_function	O-methyltransferase activity	226	9	897	<1E-100	1.988391
GO:0016301	molecular_function	kinase activity	202	8	797	<1E-100	1.980434
GO:0003743	molecular_function	translation initiation factor activity	181	7	697	<1E-100	1.946154
GO:0045454	biological_process	cell redox homeostasis	441	17	1694	<1E-100	1.941473
GO:0004553	molecular_function	hydrolase activity, hydrolyzing O-glycosyl compounds	1195	46	4583	<1E-100	1.939412
GO:0016758	molecular_function	transferase activity, transferring hexosyl groups	971	37	3687	<1E-100	1.924771
GO:0006950	biological_process	response to stress	348	13	1295	<1E-100	1.896142
GO:0016491	molecular_function	oxidoreductase activity	3280	121	12056	<1E-100	1.878028
GO:0050660	molecular_function	flavin adenine dinucleotide binding	663	24	2391	<1E-100	1.850743
GO:0005975	biological_process	carbohydrate metabolic process	1827	66	6576	<1E-100	1.847779
GO:0009058	biological_process	biosynthetic process	449	16	1594	<1E-100	1.828074
GO:0000166	molecular_function	nucleotide binding	535	19	1893	<1E-100	1.823178
GO:0008289	molecular_function	lipid binding	256	9	897	<1E-100	1.808570
GO:0003924	molecular_function	GTPase activity	548	19	1893	<1E-100	1.788541
GO:0005488	molecular_function	binding	1100	37	3687	<1E-100	1.744811
GO:0006520	biological_process	cellular amino acid metabolic process	184	6	598	<1E-100	1.700046
GO:0004252	molecular_function	serine-type endopeptidase activity	532	16	1594	<1E-100	1.583363
GO:0005525	molecular_function	GTP binding	858	25	2491	<1E-100	1.537668
GO:0046872	molecular_function	metal ion binding	1333	38	3786	<1E-100	1.506112
GO:0000287	molecular_function	magnesium ion binding	534	15	1495	<1E-100	1.484840
GO:0008168	molecular_function	methyltransferase activity	858	24	2391	<1E-100	1.478774
GO:0006334	biological_process	nucleosome assembly	216	6	598	<1E-100	1.468720
GO:0055114	biological_process	oxidation-reduction process	7255	198	19729	<1E-100	1.443242
GO:0006511	biological_process	ubiquitin-dependent protein catabolic process	518	14	1395	<1E-100	1.429192
GO:0030246	molecular_function	carbohydrate binding	598	16	1594	<1E-100	1.414644
GO:0006979	biological_process	response to oxidative stress	815	21	2092	<1E-100	1.360306
GO:0050662	molecular_function	coenzyme binding	272	7	697	<1E-100	1.358537
GO:0005507	molecular_function	copper ion binding	277	7	697	<1E-100	1.332258
GO:0005509	molecular_function	calcium ion binding	1366	33	3288	<1E-100	1.267298
GO:0004601	molecular_function	peroxidase activity	833	20	1993	<1E-100	1.258401
GO:0050661	molecular_function	NADP binding	306	7	697	<1E-100	1.188612
GO:0003723	molecular_function	RNA binding	1214	25	2491	<1E-100	1.036949
GO:0030145	molecular_function	manganese ion binding	296	6	598	6e-68	1.014154
GO:0016887	molecular_function	ATPase activity	700	14	1395	<1E-100	0.994789
GO:0009055	molecular_function	electron transfer activity	962	19	1893	<1E-100	0.976680
GO:0016747	molecular_function	transferase activity, transferring acyl groups other than amino-acyl groups	1026	18	1794	<1E-100	0.805755
GO:0045735	molecular_function	nutrient reservoir activity	408	7	697	1e-45	0.773575
GO:0006508	biological_process	proteolysis	2737	41	4085	<1E-100	0.577818
GO:0003899	molecular_function	DNA-directed 5'-3' RNA polymerase activity	475	6	598	1e-07	0.331824
GO:0005524	molecular_function	ATP binding	11634	144	14348	<1E-100	0.302511
GO:0005622	cellular_component	intracellular	1697	21	2092	7e-21	0.302192
GO:0006139	biological_process	nucleobase-containing compound metabolic process	492	6	598	1e-05	0.281093
GO:0020037	molecular_function	heme binding	3055	37	3687	3e-29	0.271142
GO:0006351	biological_process	transcription, DNA-templated	585	7	697	2e-05	0.253707
GO:0003676	molecular_function	nucleic acid binding	5286	63	6277	2e-41	0.247965
GO:0005576	cellular_component	extracellular region	594	7	697	0.0002	0.231681
AGene ontology ID significantly over-represented in the protein set; BName of the ontology source; Cname of the identified functional categories; DFrequency of the different functional categories observed in the entire wheat proteome; EFrequency of the different functional categories observed in the input set of proteins; FFrequency expected in the entire proteome calculated from the frequency ob…

## Sheet: Cluster_T2
GoidA	Ontology_sourceB	FunctionC	abundanceReferenceD	abundanceObservedE	abundanceExpectedF	pvalueFDRAdjustedG	abundanceLog2ratioH
GO:0004332	molecular_function	fructose-bisphosphate aldolase activity	24	6	1215	<1E-100	5.662174
GO:0006754	biological_process	ATP biosynthetic process	33	8	1620	<1E-100	5.617780
GO:0006108	biological_process	malate metabolic process	44	6	1215	<1E-100	4.787705
GO:0005852	cellular_component	eukaryotic translation initiation factor 3 complex	61	7	1418	<1E-100	4.538791
GO:0006413	biological_process	translational initiation	121	11	2228	<1E-100	4.202742
GO:0046034	biological_process	ATP metabolic process	106	8	1620	<1E-100	3.934253
GO:0000413	biological_process	protein peptidyl-prolyl isomerization	83	6	1215	<1E-100	3.872097
GO:0003743	molecular_function	translation initiation factor activity	181	12	2431	<1E-100	3.747290
GO:0003755	molecular_function	peptidyl-prolyl cis-trans isomerase activity	92	6	1215	<1E-100	3.723574
GO:0006096	biological_process	glycolytic process	202	13	2633	<1E-100	3.704402
GO:0016616	molecular_function	oxidoreductase activity, acting on the CH-OH group of donors, NAD or NADP as acceptor	243	10	2026	<1E-100	3.059289
GO:0019752	biological_process	carboxylic acid metabolic process	156	6	1215	<1E-100	2.961734
GO:0006886	biological_process	intracellular protein transport	456	17	3443	<1E-100	2.916747
GO:0016746	molecular_function	transferase activity, transferring acyl groups	163	6	1215	<1E-100	2.898408
GO:0006457	biological_process	protein folding	347	12	2431	<1E-100	2.808344
GO:0005737	cellular_component	cytoplasm	958	29	5874	<1E-100	2.616273
GO:0003723	molecular_function	RNA binding	1214	36	7292	<1E-100	2.586546
GO:0051287	molecular_function	NAD binding	331	9	1823	<1E-100	2.461411
GO:0016192	biological_process	vesicle-mediated transport	303	8	1620	<1E-100	2.419000
GO:0005488	molecular_function	binding	1100	29	5874	<1E-100	2.416867
GO:0003924	molecular_function	GTPase activity	548	14	2836	<1E-100	2.371497
GO:0005525	molecular_function	GTP binding	858	19	3849	<1E-100	2.165268
GO:0000287	molecular_function	magnesium ion binding	534	11	2228	<1E-100	2.060910
GO:0005975	biological_process	carbohydrate metabolic process	1827	37	7495	<1E-100	2.036366
GO:0003824	molecular_function	catalytic activity	3441	69	13976	<1E-100	2.022086
GO:0045735	molecular_function	nutrient reservoir activity	408	8	1620	<1E-100	1.989749
GO:0006633	biological_process	fatty acid biosynthetic process	307	6	1215	<1E-100	1.985041
GO:0015986	biological_process	ATP synthesis coupled proton transport	413	8	1620	<1E-100	1.972176
GO:0000166	molecular_function	nucleotide binding	535	9	1823	<1E-100	1.768704
GO:0004553	molecular_function	hydrolase activity, hydrolyzing O-glycosyl compounds	1195	20	4051	<1E-100	1.761307
GO:0030170	molecular_function	pyridoxal phosphate binding	373	6	1215	<1E-100	1.704105
GO:0016787	molecular_function	hydrolase activity	1125	18	3646	<1E-100	1.696390
GO:0004601	molecular_function	peroxidase activity	833	13	2633	<1E-100	1.660441
GO:0006979	biological_process	response to oxidative stress	815	12	2431	<1E-100	1.576480
GO:0016491	molecular_function	oxidoreductase activity	3280	45	9115	<1E-100	1.474547
GO:0045454	biological_process	cell redox homeostasis	441	6	1215	<1E-100	1.462501
GO:0008152	biological_process	metabolic process	3120	41	8305	<1E-100	1.412396
GO:0016887	molecular_function	ATPase activity	700	9	1823	<1E-100	1.380888
GO:0005622	cellular_component	intracellular	1697	21	4254	<1E-100	1.325720
GO:0003735	molecular_function	structural constituent of ribosome	2071	25	5064	<1E-100	1.289918
GO:0006412	biological_process	translation	2084	24	4861	<1E-100	1.221997
GO:0004252	molecular_function	serine-type endopeptidase activity	532	6	1215	<1E-100	1.191854
GO:0046872	molecular_function	metal ion binding	1333	15	3038	<1E-100	1.188603
GO:0006810	biological_process	transport	1101	12	2431	<1E-100	1.142538
GO:0005840	cellular_component	ribosome	1983	21	4254	<1E-100	1.101022
GO:0055114	biological_process	oxidation-reduction process	7255	75	15192	<1E-100	1.066233
GO:0050660	molecular_function	flavin adenine dinucleotide binding	663	6	1215	<1E-100	0.874271
GO:0006508	biological_process	proteolysis	2737	24	4861	<1E-100	0.828757
GO:0000786	cellular_component	nucleosome	687	6	1215	<1E-100	0.822970
GO:0003676	molecular_function	nucleic acid binding	5286	42	8507	<1E-100	0.686531
GO:0008168	molecular_function	methyltransferase activity	858	6	1215	2e-33	0.502303
GO:0016747	molecular_function	transferase activity, transferring acyl groups other than amino-acyl groups	1026	7	1418	2e-33	0.466714
GO:0005215	molecular_function	transporter activity	903	6	1215	2e-24	0.428554
GO:0005634	cellular_component	nucleus	2268	14	2836	7e-32	0.322324
GO:0005509	molecular_function	calcium ion binding	1366	8	1620	4e-11	0.246432
GO:0008234	molecular_function	cysteine-type peptidase activity	1214	7	1418	4e-08	0.223976
GO:0020037	molecular_function	heme binding	3055	16	3241	0.005	0.085217
AGene ontology ID significantly over-represented in the protein set; BName of the ontology source; Cname of the identified functional categories; DFrequency of the different functional categories observed in the entire wheat proteome; EFrequency of the different functional categories observed in the input set of proteins; FFrequency expected in the entire proteome calculated from the frequency ob…

## Sheet: Cluster_Cv+T1
GoidA	Ontology_sourceB	FunctionC	abundanceReferenceD	abundanceObservedE	abundanceExpectedF	pvalueFDRAdjustedG	abundanceLog2ratioH
GO:0010181	molecular_function	FMN binding	174	11	11585	<1E-100	6.057030
GO:0000287	molecular_function	magnesium ion binding	534	6	6319	<1E-100	3.564808
GO:0003824	molecular_function	catalytic activity	3441	25	26330	<1E-100	2.935786
GO:0016491	molecular_function	oxidoreductase activity	3280	20	21064	<1E-100	2.682990
GO:0008152	biological_process	metabolic process	3120	14	14745	<1E-100	2.240566
GO:0055114	biological_process	oxidation-reduction process	7255	22	23170	<1E-100	1.675213
GO:0005524	molecular_function	ATP binding	11634	15	15798	<1E-100	0.441373
GO:0005515	molecular_function	protein binding	20267	20	21064	1e-07	0.055625
AGene ontology ID significantly over-represented in the protein set; BName of the ontology source; Cname of the identified functional categories; DFrequency of the different functional categories observed in the entire wheat proteome; EFrequency of the different functional categories observed in the input set of proteins; FFrequency expected in the entire proteome calculated from the frequency ob…

## Sheet: Cluster_Cv+T2
GoidA	Ontology_sourceB	FunctionC	abundanceReferenceD	abundanceObservedE	abundanceExpectedF	pvalueFDRAdjustedG	abundanceLog2ratioH
GO:0004634	molecular_function	phosphopyruvate hydratase activity	15	7	9092	<1E-100	9.243444
GO:0006096	biological_process	glycolytic process	202	7	9092	<1E-100	5.492123
GO:0000287	molecular_function	magnesium ion binding	534	9	11689	<1E-100	4.452209
GO:0005737	cellular_component	cytoplasm	958	6	7793	<1E-100	3.024061
GO:0008152	biological_process	metabolic process	3120	18	23379	<1E-100	2.905575
GO:0016787	molecular_function	hydrolase activity	1125	6	7793	<1E-100	2.792233
GO:0005975	biological_process	carbohydrate metabolic process	1827	9	11689	<1E-100	2.677644
GO:0003824	molecular_function	catalytic activity	3441	12	15586	<1E-100	2.179330
GO:0016491	molecular_function	oxidoreductase activity	3280	8	10391	<1E-100	1.663500
GO:0006508	biological_process	proteolysis	2737	6	7793	<1E-100	1.509563
GO:0055114	biological_process	oxidation-reduction process	7255	15	19482	<1E-100	1.425111
AGene ontology ID significantly over-represented in the protein set; BName of the ontology source; Cname of the identified functional categories; DFrequency of the different functional categories observed in the entire wheat proteome; EFrequency of the different functional categories observed in the input set of proteins; FFrequency expected in the entire proteome calculated from the frequency ob…

## Sheet: Cluster_Cv+T3
GoidA	Ontology_sourceB	FunctionC	abundanceReferenceD	abundanceObservedE	abundanceExpectedF	pvalueFDRAdjustedG	abundanceLog2ratioH
GO:0009521	cellular_component	photosystem	113	7	3644	<1E-100	5.010996
GO:0016168	molecular_function	chlorophyll binding	119	7	3644	<1E-100	4.936357
GO:0009767	biological_process	photosynthetic electron transport chain	184	8	4164	<1E-100	4.500258
GO:0019684	biological_process	photosynthesis, light reaction	255	11	5726	<1E-100	4.488898
GO:0006457	biological_process	protein folding	347	11	5726	<1E-100	4.044460
GO:0051082	molecular_function	unfolded protein binding	241	7	3644	<1E-100	3.918286
GO:0050661	molecular_function	NADP binding	306	8	4164	<1E-100	3.766432
GO:0045454	biological_process	cell redox homeostasis	441	11	5726	<1E-100	3.698617
GO:0051287	molecular_function	NAD binding	331	8	4164	<1E-100	3.653133
GO:0015979	biological_process	photosynthesis	786	12	6246	<1E-100	2.990397
GO:0009523	cellular_component	photosystem II	434	6	3123	<1E-100	2.847231
GO:0009055	molecular_function	electron transfer activity	962	12	6246	<1E-100	2.698889
GO:0016491	molecular_function	oxidoreductase activity	3280	33	17177	<1E-100	2.388734
GO:0005737	cellular_component	cytoplasm	958	9	4685	<1E-100	2.289863
GO:0006412	biological_process	translation	2084	16	8328	<1E-100	1.998680
GO:0005840	cellular_component	ribosome	1983	15	7808	<1E-100	1.977242
GO:0003735	molecular_function	structural constituent of ribosome	2071	15	7808	<1E-100	1.914599
GO:0005622	cellular_component	intracellular	1697	12	6246	<1E-100	1.880012
GO:0003824	molecular_function	catalytic activity	3441	21	10931	<1E-100	1.667525
GO:0055114	biological_process	oxidation-reduction process	7255	41	21341	<1E-100	1.556612
GO:0003723	molecular_function	RNA binding	1214	6	3123	<1E-100	1.363230
GO:0046872	molecular_function	metal ion binding	1333	6	3123	<1E-100	1.228321
GO:0016020	cellular_component	membrane	4659	19	9890	<1E-100	1.085943
GO:0008152	biological_process	metabolic process	3120	11	5726	<1E-100	0.875921
GO:0003676	molecular_function	nucleic acid binding	5286	15	7808	<1E-100	0.562750
GO:0020037	molecular_function	heme binding	3055	8	4164	<1E-100	0.446863
GO:0016021	cellular_component	integral component of membrane	3664	9	4685	6e-63	0.354541
GO:0005524	molecular_function	ATP binding	11634	26	13534	1e-68	0.218200
AGene ontology ID significantly over-represented in the protein set; BName of the ontology source; Cname of the identified functional categories; DFrequency of the different functional categories observed in the entire wheat proteome; EFrequency of the different functional categories observed in the input set of proteins; FFrequency expected in the entire proteome calculated from the frequency ob…

## Sheet: Cluster_Cv+T4
GoidA	Ontology_sourceB	FunctionC	abundanceReferenceD	abundanceObservedE	abundanceExpectedF	pvalueFDRAdjustedG	abundanceLog2ratioH
GO:0003857	molecular_function	3-hydroxyacyl-CoA dehydrogenase activity	19	7	4100	<1E-100	7.753634
GO:0006631	biological_process	fatty acid metabolic process	71	8	4686	<1E-100	6.044460
GO:0006099	biological_process	tricarboxylic acid cycle	68	7	4100	<1E-100	5.914099
GO:0003824	molecular_function	catalytic activity	3441	45	26360	<1E-100	2.937448
GO:0004553	molecular_function	hydrolase activity, hydrolyzing O-glycosyl compounds	1195	15	8787	<1E-100	2.878303
GO:0008152	biological_process	metabolic process	3120	38	22260	<1E-100	2.834804
GO:0006979	biological_process	response to oxidative stress	815	9	5272	<1E-100	2.693476
GO:0005975	biological_process	carbohydrate metabolic process	1827	20	11716	<1E-100	2.680874
GO:0016491	molecular_function	oxidoreductase activity	3280	33	19331	<1E-100	2.559121
GO:0005737	cellular_component	cytoplasm	958	7	4100	<1E-100	2.097680
GO:0055114	biological_process	oxidation-reduction process	7255	53	31046	<1E-100	2.097367
GO:0016747	molecular_function	transferase activity, transferring acyl groups other than amino-acyl groups	1026	7	4100	<1E-100	1.998747
GO:0016758	molecular_function	transferase activity, transferring hexosyl groups	971	6	3515	<1E-100	1.855842
GO:0005622	cellular_component	intracellular	1697	7	4100	<1E-100	1.272791
GO:0020037	molecular_function	heme binding	3055	12	7029	<1E-100	1.202213
GO:0006508	biological_process	proteolysis	2737	7	4100	<1E-100	0.583182
AGene ontology ID significantly over-represented in the protein set; BName of the ontology source; Cname of the identified functional categories; DFrequency of the different functional categories observed in the entire wheat proteome; EFrequency of the different functional categories observed in the input set of proteins; FFrequency expected in the entire proteome calculated from the frequency ob…

[truncated: 6 more sheets: Cluster_Cv+T5, Cluster_CvxT1, Cluster_CvxT2, Cluster_CvxT3, Cluster_CvxT4, Cluster_CvxT5]
